# Supplementary material for: The hijacking of a wheat Exo70-like protein by a fungal pathogen triggers disease
Source: Research Square preprint supplement (doi:10.21203/rs.3.rs-8788414/v1), 2026-02-09
Supplement: Supplementary file 1 [file 573ef0506e5066f2621b4777.xlsx]

## Sheet: Supplementary Table 1
Supplementary Table 1. 2,037 single-nucleotide polymorphism (SNP) markers from the Illumina iSelect 90K SNP array used to assemble linkage groups corresponding to 14 chromosomes in the biparental population consisting of 149 recombinant inbred lines derived from the durum cultivars Kronos and Gredho. "A" represents Kronos allele and "B" represent Gredho allele.
Wheat-90K-SNP-index	Wheat-90K-SNP Name	Chrom	Genetic Position (cM)	KG-RIL-1	KG-RIL-2	KG-RIL-4	KG-RIL-5	KG-RIL-6	KG-RIL-7	KG-RIL-8	KG-RIL-9	KG-RIL-10	KG-RIL-11	KG-RIL-12	KG-RIL-13	KG-RIL-14	KG-RIL-15	KG-RIL-16	KG-RIL-17	KG-RIL-18	KG-RIL-19	KG-RIL-20	KG-RIL-21	KG-RIL-22	KG-RIL-24	KG-RIL-25	KG-RIL-26	KG-RIL-27	KG-RIL-28	KG-RIL-29	KG-RIL-30	KG-RIL-31	KG-RIL-32	KG-RIL-33	KG-RIL-34	KG-RIL-35	KG-RIL-36	KG-RIL-37	KG-RIL-38	KG-RIL-39	KG-RIL-40	KG-RIL-41	KG-RIL-42	KG-RIL-43	KG-RIL-44	KG-RIL-45	KG-RIL-46	KG-RIL-47	KG-RIL-48
IWB34801	IAAV3919	1A	0	A	A	B	B	B	A	A	A	A	A	A	B	A	A	A	B	B	B	A	A	B	A	A	A	A	A	A	A	A	B	A	A	A	A	B	B	B	B	A	A	A	B	B	A	A	A
IWB61980	RAC875_rep_c110533_92	1A	0	A	A	B	B	B	A	A	A	A	A	A	B	A	A	A	B	B	B	A	A	B	A	A	A	A	A	A	A	A	B	A	A	A	A	B	B	B	B	A	A	A	B	B	A	A	A
IWB17894	D_GA8KES402HR8TV_187	1A	19.1523	A	A	B	B	B	A	A	A	B	A	A	B	B	A	A	A	B	B	B	A	A	A	A	A	B	A	A	A	A	B	A	A	A	A	A	A	A	B	A	A	B	B	B	A	B	A
IWB73129	Tdurum_contig68827_61	1A	20.5711	A	A	B	B	B	A	A	A	B	A	A	B	B	A	A	A	B	B	B	A	A	A	A	A	B	A	A	A	A	B	A	A	A	A	A	A	A	B	A	A	B	B	B	A	A	A
IWB7333	BS00022943_51	1A	20.5711	A	A	B	B	B	A	A	A	B	A	A	B	B	A	A	A	B	B	B	A	A	A	A	A	B	A	A	A	A	B	A	A	A	A	A	A	A	B	A	A	B	B	B	A	A	A
IWB45715	Kukri_c46939_83	1A	20.5711	A	A	B	B	B	A	A	A	B	A	A	B	B	A	A	A	B	B	B	A	A	A	A	A	B	A	A	A	A	B	A	A	A	A	A	A	A	B	A	A	B	B	B	A	A	A
IWB5842	BS00003595_51	1A	20.5711	A	A	B	B	B	A	A	A	B	A	A	B	B	A	A	A	B	B	B	A	A	A	A	A	B	A	A	A	A	B	A	A	A	A	A	A	A	B	A	A	B	B	B	A	A	A
IWB71462	Tdurum_contig43943_56	1A	20.5711	A	A	B	B	B	A	A	A	B	A	A	B	B	A	A	A	B	B	B	A	A	A	A	A	B	A	A	A	A	B	A	A	A	A	A	A	A	B	A	A	B	B	B	A	A	A
IWB12795	CAP11_c2581_302	1A	20.5711	A	A	B	B	B	A	A	A	B	A	A	B	B	A	A	A	B	B	B	A	A	A	A	A	B	A	A	A	A	B	A	A	A	A	A	A	A	B	A	A	B	B	B	A	A	A
IWB71688	Tdurum_contig46413_779	1A	20.5711	A	A	B	B	B	A	A	A	B	A	A	B	B	A	A	A	B	B	B	A	A	A	A	A	B	A	A	A	A	B	A	A	A	A	A	A	A	B	A	A	B	B	B	A	A	A
IWB42196	Kukri_c1977_1940	1A	20.5711	A	A	B	B	B	A	A	A	B	A	A	B	B	A	A	A	B	B	B	A	A	A	A	A	B	A	A	A	A	B	A	A	A	A	A	A	A	B	A	A	B	B	B	A	A	A
IWB71687	Tdurum_contig46413_680	1A	20.5711	A	A	B	B	B	A	A	A	B	A	A	B	B	A	A	A	B	B	B	A	A	A	A	A	B	A	A	A	A	B	A	A	A	A	A	A	A	B	A	A	B	B	B	A	A	A
IWB69234	Tdurum_contig26035_231	1A	25.0605	A	A	B	B	B	A	A	A	B	A	A	B	B	A	A	A	B	B	B	A	A	B	A	A	B	A	A	A	A	B	B	A	A	A	A	A	B	B	A	B	B	B	B	A	A	A
IWB4186	BobWhite_c6558_234	1A	26.44	A	A	B	B	A	A	A	A	B	A	A	B	B	A	A	A	B	B	B	A	A	B	A	A	B	A	A	A	A	B	B	A	A	A	A	A	B	B	A	B	B	B	B	A	A	A
IWA4754	wsnp_Ex_c7965_13520238	1A	26.44	A	A	B	B	A	A	A	A	B	A	A	B	B	A	A	A	B	B	B	A	A	B	A	A	B	A	A	A	A	B	B	A	A	A	A	A	B	B	A	B	B	B	B	A	A	A
IWB12206	BS00103478_51	1A	26.44	A	A	B	B	A	A	A	A	B	A	A	B	B	A	A	A	B	B	B	A	A	B	A	A	B	A	A	A	A	B	B	A	A	A	A	A	B	B	A	B	B	B	B	A	A	A
IWB11053	BS00079071_51	1A	27.504	A	A	B	B	A	A	A	A	B	A	A	B	B	B	A	A	B	B	B	A	A	B	A	A	B	A	A	A	A	B	B	A	A	A	A	A	B	A	A	-	B	B	B	A	A	A
IWB73615	Tdurum_contig83113_134	1A	27.8512	A	A	B	B	A	A	A	A	B	A	A	B	B	B	A	A	B	B	B	A	A	B	A	A	B	A	A	A	A	B	B	A	A	A	A	A	B	A	A	-	B	B	B	A	A	A
IWB34675	IAAV3168	1A	27.8512	A	A	B	B	A	-	A	A	B	A	A	B	B	B	A	A	B	B	B	A	A	B	A	A	B	A	A	A	A	B	B	A	A	A	A	A	B	A	A	-	B	B	B	A	A	A
IWB53646	RAC875_c13012_174	1A	27.8512	A	A	B	B	A	A	A	A	B	A	A	B	B	B	A	A	B	B	B	A	A	B	A	A	B	A	A	A	A	B	B	A	A	A	A	A	B	A	A	-	B	B	B	A	A	A
IWB12251	BS00105601_51	1A	31.0698	A	A	B	A	A	A	A	A	B	A	A	B	B	B	A	A	B	A	B	A	A	B	A	A	B	A	A	A	A	B	B	A	A	A	A	A	B	A	A	B	B	B	B	A	A	A
IWA4008	wsnp_Ex_c48087_53105842	1A	31.0698	A	A	B	A	A	A	A	A	B	A	A	B	B	B	A	A	B	A	B	A	A	B	A	A	B	A	A	A	A	B	B	A	A	A	A	A	B	A	A	B	B	B	B	A	A	A
IWB14138	CAP7_c4833_55	1A	31.0698	A	A	B	A	A	A	A	A	B	A	A	B	B	B	A	A	B	A	B	A	A	B	A	A	B	A	A	A	A	B	B	A	A	A	A	A	B	A	A	B	B	B	B	A	A	A
IWA7050	wsnp_Ku_c42878_50516167	1A	31.0698	A	A	B	A	A	A	A	A	B	A	A	B	B	B	A	A	B	A	B	A	A	B	A	A	B	A	A	A	A	B	B	A	A	A	A	A	B	A	A	B	B	B	B	A	A	A
IWB54363	RAC875_c16820_419	1A	31.0698	A	A	B	A	A	A	A	A	B	A	A	B	B	B	A	A	B	A	B	A	A	B	A	A	B	A	A	A	A	B	B	A	A	A	A	A	B	A	A	B	B	B	B	A	A	A
IWB3294	BobWhite_c4328_1345	1A	32.0903	A	A	B	A	A	A	A	A	B	A	A	B	B	B	A	A	A	A	B	A	A	B	A	A	B	A	A	A	A	B	B	A	A	A	A	A	B	A	A	B	B	B	B	A	A	A
IWB31932	GENE-0507_285	1A	35.6934	A	A	B	A	A	A	A	A	B	A	A	B	B	B	A	A	A	A	B	A	A	B	A	A	B	A	A	A	A	B	B	A	A	A	A	A	B	A	A	B	B	B	B	A	A	A
IWA3373	wsnp_Ex_c31983_40709607	1A	35.6934	A	A	B	A	A	A	A	A	B	A	A	B	B	B	A	A	A	A	B	A	A	B	A	A	B	A	A	A	A	B	B	A	A	A	A	A	B	A	A	B	B	B	B	A	A	A
IWA3374	wsnp_Ex_c31983_40709866	1A	35.6934	A	A	B	A	A	-	A	A	B	A	A	B	B	B	A	A	A	A	B	A	A	B	A	A	B	A	A	A	A	B	B	A	A	A	A	A	B	A	A	B	B	B	B	A	A	A
IWB65739	TA003773-0807	1A	39.7462	A	A	B	A	B	A	A	A	A	A	A	B	B	B	A	A	A	A	B	A	A	B	A	A	B	A	A	A	A	B	B	A	A	A	A	A	B	B	A	A	B	B	B	A	A	A
IWB6538	BS00012210_51	1A	39.7462	A	A	B	A	B	A	A	A	A	A	A	B	B	B	A	A	A	A	B	A	A	B	A	A	B	A	A	A	A	B	B	A	A	A	A	A	B	B	A	A	B	B	B	A	A	A
IWB72042	Tdurum_contig5008_635	1A	41.9057	A	A	B	A	B	A	A	A	A	A	A	B	B	B	A	A	A	A	B	B	A	B	A	A	B	A	A	A	A	B	B	A	A	A	A	A	B	B	A	A	B	B	B	A	A	A
IWB7075	BS00022426_51	1A	41.9057	A	A	B	A	B	A	A	A	A	A	A	B	B	B	A	A	A	A	B	B	A	B	A	A	B	A	A	A	A	B	B	A	A	A	A	A	B	B	A	A	B	B	B	A	A	A
IWB73155	Tdurum_contig69753_513	1A	41.9057	A	A	B	A	B	A	A	A	A	A	A	B	B	B	A	A	A	A	B	B	A	B	A	A	B	A	A	A	A	B	B	A	A	A	A	A	B	B	A	A	B	B	B	A	A	A
IWB3515	BobWhite_c4646_119	1A	41.9057	A	A	B	A	B	A	A	A	A	A	A	B	B	B	A	A	A	A	B	B	A	B	A	A	B	A	A	A	A	B	B	A	A	A	A	A	B	B	A	A	B	B	B	A	-	A
IWA2922	wsnp_Ex_c24686_33942264	1A	45.2191	A	A	B	A	B	A	A	A	A	A	A	B	B	B	A	A	A	A	A	B	A	B	A	A	B	A	A	A	A	B	B	A	B	A	A	A	B	B	A	A	B	B	B	A	-	A
IWB34853	IAAV4243	1A	45.2191	A	A	B	A	B	A	A	A	A	A	A	B	B	B	A	A	A	A	A	B	A	B	A	A	B	A	A	A	A	B	B	A	B	A	A	A	B	B	A	A	B	B	B	A	-	A
IWB20438	Ex_c29914_480	1A	45.2191	A	A	B	A	B	A	A	A	A	A	A	B	B	B	A	A	A	A	A	B	A	B	-	A	B	A	A	A	A	B	B	A	B	A	A	A	B	B	A	A	B	B	B	A	-	A
IWB35435	IAAV814	1A	45.9334	A	A	B	A	B	A	A	A	A	A	A	B	B	B	A	A	A	A	A	B	A	B	A	A	B	A	A	A	A	B	B	A	B	A	A	A	B	B	A	A	B	B	B	B	A	A
IWB34385	IAAV1463	1A	45.9334	A	A	B	A	B	A	A	A	A	A	A	B	B	B	A	A	A	A	A	B	A	B	A	A	B	A	A	A	A	B	B	A	B	A	A	A	B	B	-	A	B	B	B	B	-	A
IWB52278	Ra_c5696_1556	1A	45.9334	A	A	B	A	B	A	A	A	A	A	A	B	B	B	A	A	A	A	A	B	A	B	A	A	B	A	A	A	A	B	B	A	B	A	A	A	B	B	A	A	B	B	B	B	-	A
IWB2715	BobWhite_c34661_208	1A	46.2831	A	A	B	A	B	A	A	A	A	-	A	B	B	B	A	A	A	A	A	B	A	B	A	A	B	A	A	A	A	B	B	A	B	A	A	A	B	B	A	A	B	B	B	B	-	A
IWB45874	Kukri_c48434_88	1A	46.2831	A	A	B	A	B	A	A	A	A	A	A	B	B	B	A	A	A	-	A	B	A	B	A	A	B	A	A	A	A	B	B	A	B	A	A	A	B	B	A	A	B	B	B	B	-	A
IWB25588	Excalibur_c35312_109	1A	46.9923	A	A	B	A	B	A	A	A	A	B	A	B	B	B	A	A	A	A	A	B	A	B	A	A	B	A	A	A	A	B	B	A	B	A	A	A	B	B	A	A	B	A	B	B	-	A
IWA1482	wsnp_Ex_c11374_18361760	1A	46.9923	A	A	B	A	B	-	A	A	A	B	A	B	B	B	A	A	A	A	A	B	A	B	A	A	B	A	A	A	A	B	B	A	B	A	A	A	B	B	A	A	B	A	B	B	-	A
IWA6942	wsnp_Ku_c3468_6420199	1A	46.9923	A	A	B	A	B	A	A	A	A	B	A	B	B	B	A	A	A	A	A	B	A	B	A	A	B	A	A	A	A	B	B	A	B	A	A	A	B	B	A	A	B	A	B	B	-	A
IWB55216	RAC875_c21620_1359	1A	46.9923	A	A	B	A	B	A	A	A	A	B	A	B	B	B	A	A	A	A	A	B	A	B	A	A	B	A	A	A	A	B	B	A	B	A	A	A	B	B	A	A	B	A	B	B	-	A
IWB11130	BS00080438_51	1A	46.9923	A	A	B	A	B	A	A	A	A	B	A	B	B	B	A	A	A	A	A	B	A	B	A	A	B	A	A	A	A	B	B	A	B	A	A	A	B	B	A	A	B	A	B	B	-	A
IWB20204	Ex_c23451_720	1A	46.9923	A	A	B	A	B	A	A	A	A	B	A	B	B	B	A	A	A	A	A	B	A	B	A	A	B	A	A	A	A	B	B	A	B	A	A	A	B	B	A	A	B	A	B	B	-	A
IWB7788	BS00030644_51	1A	46.9923	A	A	B	A	B	A	A	A	A	B	A	B	B	B	A	A	A	A	A	B	A	B	A	A	B	A	A	A	A	B	B	A	B	A	A	A	B	B	A	A	B	A	B	B	-	A
IWB28329	Excalibur_c64855_328	1A	46.9923	A	A	B	A	B	A	A	A	A	B	A	B	B	B	A	A	A	A	A	B	A	B	A	A	B	A	A	A	A	B	B	A	B	A	A	A	B	B	A	A	B	A	B	B	-	A
IWB5898	BS00003813_51	1A	46.9923	A	A	B	A	B	A	A	A	A	B	A	B	B	B	A	A	A	A	A	B	A	B	A	A	B	A	A	A	A	B	B	A	B	A	A	A	B	B	A	A	B	A	B	B	-	A
IWA2851	wsnp_Ex_c2389_4478238	1A	46.9923	A	A	B	A	B	-	A	A	A	B	A	B	B	B	A	A	A	A	A	B	A	B	-	A	B	A	A	A	A	B	B	A	B	A	A	A	B	B	A	A	B	A	B	B	-	A
IWB7945	BS00033760_51	1A	46.9923	A	A	B	A	B	A	A	A	A	-	A	B	B	B	A	A	A	A	A	B	A	B	A	A	B	A	A	A	A	B	B	A	B	A	A	A	B	B	A	A	B	A	B	B	-	A
IWB39080	Ku_c2898_221	1A	46.9923	A	A	B	A	B	A	A	A	A	B	A	B	B	B	A	A	A	A	A	B	A	B	A	A	B	A	A	A	A	B	B	A	B	A	A	A	B	B	A	A	B	A	B	B	-	A
IWB12461	BS00110039_51	1A	46.9923	A	A	B	A	B	A	A	A	A	B	A	B	B	B	A	A	A	A	A	B	A	B	A	A	B	A	A	A	A	B	B	A	B	A	A	A	B	B	A	A	B	A	B	B	-	A
IWA764	wsnp_CAP11_c3968_1874257	1A	46.9923	A	A	B	A	B	A	A	A	A	B	A	B	B	B	A	A	A	A	A	B	A	B	A	A	B	A	A	A	A	B	B	A	B	A	A	A	B	B	-	A	B	A	B	B	-	A
IWB34812	IAAV3998	1A	46.9923	A	A	B	A	B	A	A	A	A	B	A	B	B	B	A	A	A	A	A	B	A	B	A	A	B	A	A	A	A	B	B	A	B	A	A	A	B	B	A	A	B	A	B	B	-	A
IWA2248	wsnp_Ex_c17684_26426785	1A	46.9923	A	A	B	A	B	A	A	A	A	B	A	B	B	B	A	A	A	A	A	B	A	B	A	A	B	A	A	A	A	B	B	A	B	A	A	A	B	B	A	A	B	A	B	B	-	A
IWA7804	wsnp_Ra_c26956_36503468	1A	46.9923	A	A	B	A	B	A	A	A	A	B	A	B	B	B	A	A	A	A	A	B	A	B	A	A	B	A	A	A	A	B	B	A	B	A	A	A	B	B	A	A	B	A	B	B	-	A
IWA5320	wsnp_Ex_rep_c66875_65276404	1A	46.9923	A	A	B	A	B	A	A	A	A	B	A	B	B	B	A	A	A	A	A	B	A	B	A	A	B	A	A	A	A	B	B	A	B	A	A	A	B	B	A	A	B	A	B	B	-	A
IWA3612	wsnp_Ex_c3747_6824863	1A	46.9923	A	A	B	A	B	A	A	A	A	B	A	B	B	B	A	A	A	A	A	B	A	B	A	A	B	A	A	A	A	B	B	A	B	A	A	A	B	B	A	A	B	A	B	B	-	A
IWB35579	IAAV9022	1A	46.9923	A	A	B	A	B	A	A	A	A	B	A	B	B	B	A	A	A	A	A	B	A	B	A	A	B	A	A	A	A	B	B	A	B	A	A	A	B	B	A	A	B	A	B	B	-	A
IWB20564	Ex_c3567_1048	1A	46.9923	A	A	B	A	B	A	A	A	A	B	A	B	B	B	A	A	A	A	A	B	A	B	A	A	B	A	A	A	A	B	B	A	B	A	A	A	B	B	A	A	B	A	B	B	-	A
IWA3534	wsnp_Ex_c3567_6526582	1A	46.9923	A	A	B	A	B	A	A	A	A	B	A	B	B	B	A	A	A	A	A	B	A	B	A	A	B	A	A	A	A	B	B	A	B	A	A	A	B	B	A	A	B	A	B	B	-	A
IWA4591	wsnp_Ex_c6934_11953178	1A	46.9923	A	A	B	A	B	A	A	A	A	B	A	B	B	B	A	A	A	A	A	B	A	B	A	A	B	A	A	A	A	B	B	A	B	A	A	A	B	B	A	A	B	A	B	B	-	A
IWB10020	BS00067330_51	1A	46.9923	A	A	B	A	B	A	A	A	A	B	A	B	B	B	A	A	A	A	A	B	A	B	A	A	B	A	A	A	A	B	B	A	B	A	A	A	B	B	A	A	B	A	B	B	-	A
IWB10960	BS00077815_51	1A	46.9923	A	A	B	A	B	A	A	A	A	B	A	B	B	B	A	A	A	A	A	B	A	B	A	A	B	A	A	A	A	B	B	A	B	A	A	A	B	B	A	A	B	A	B	B	-	A
IWA4578	wsnp_Ex_c6826_11774795	1A	46.9923	A	A	B	A	B	A	A	A	A	B	A	B	B	B	A	A	A	-	A	B	A	B	A	A	B	A	A	A	A	B	B	A	B	A	A	A	B	B	A	A	B	A	B	B	-	A
IWB8993	BS00063063_51	1A	46.9923	A	A	B	A	B	A	A	A	A	B	A	B	B	B	A	A	A	A	A	B	A	B	A	A	B	A	A	A	A	B	B	A	B	A	A	A	B	B	A	A	B	A	B	B	-	A
IWB45313	Kukri_c4318_101	1A	47.3469	A	A	B	A	B	A	A	A	A	B	A	B	B	B	A	A	A	A	A	B	A	B	A	A	B	A	A	A	A	B	B	A	B	A	A	A	B	B	A	A	B	A	B	B	-	A
IWA639	wsnp_CAP11_c1029_611774	1A	50.3354	A	A	B	A	B	A	A	A	A	B	A	B	B	B	A	A	A	A	A	A	A	B	A	A	B	A	A	A	A	B	B	A	B	A	A	A	B	B	A	A	B	A	B	B	-	A
IWB71415	Tdurum_contig43360_1381	1A	50.3354	A	A	B	A	B	A	A	A	A	B	A	B	B	B	A	A	A	A	A	A	A	B	A	A	B	A	A	A	A	B	B	A	B	A	A	A	B	B	A	A	B	A	B	B	-	A
IWB34951	IAAV4916	1A	50.3354	A	A	B	A	B	A	A	A	A	B	A	B	B	B	A	A	A	A	A	A	A	B	A	A	B	A	A	A	A	B	B	A	B	A	A	A	B	B	A	A	B	A	B	B	-	A
IWB31665	GENE-0099_460	1A	50.3354	A	A	B	A	B	A	A	A	A	B	A	B	B	B	A	A	A	A	A	A	A	B	A	A	B	A	A	A	A	B	B	A	B	A	A	A	B	B	A	A	B	A	B	B	-	A
IWA2651	wsnp_Ex_c2178_4086161	1A	50.3354	A	A	B	A	B	A	A	A	A	B	A	B	B	B	A	A	A	A	A	A	A	B	A	A	B	A	A	A	A	B	B	A	B	A	A	A	B	B	A	A	B	A	B	B	-	A
IWB57739	RAC875_c41581_176	1A	50.3354	A	A	B	A	B	A	A	A	A	B	A	B	B	B	A	A	A	A	A	A	A	B	A	A	B	A	A	A	A	B	B	A	B	A	A	A	B	B	A	A	B	A	B	B	-	A
IWB10619	BS00072686_51	1A	50.3354	A	A	B	A	B	A	A	A	A	B	A	B	B	B	A	A	A	A	A	A	A	B	A	A	B	A	A	A	A	B	B	A	B	A	A	A	B	B	A	A	B	A	B	B	-	A
IWB12162	BS00101116_51	1A	50.3354	A	A	B	A	B	A	A	A	A	B	A	B	B	B	A	A	A	A	A	A	A	B	A	A	B	A	A	A	A	B	B	A	B	A	A	A	B	B	A	A	B	A	B	B	-	A
IWB71632	Tdurum_contig45671_799	1A	50.3354	A	A	B	A	B	-	A	A	A	B	A	B	B	B	A	A	A	A	A	A	A	B	A	A	B	A	A	A	A	B	B	A	B	A	A	A	B	B	A	A	B	A	B	B	-	A
IWA3882	wsnp_Ex_c44049_50205457	1A	51.0298	A	A	B	A	B	A	A	A	A	B	A	B	B	B	A	A	A	A	A	A	A	B	A	A	B	A	A	A	A	B	B	A	B	A	A	A	B	B	A	A	B	A	B	B	-	A
IWA4852	wsnp_Ex_c8885_14842394	1A	51.0298	A	A	B	A	B	A	A	A	A	B	A	B	B	B	A	A	A	A	A	A	A	B	A	A	B	A	A	A	A	B	B	A	B	A	A	A	B	B	A	A	B	A	B	B	A	A
IWB31690	GENE-0126_140	1A	51.0298	A	A	B	A	B	A	A	A	A	B	A	B	B	B	A	A	A	A	A	A	A	B	A	A	B	A	A	A	A	B	B	A	B	A	A	A	B	B	A	A	B	A	B	B	A	A
IWB45374	Kukri_c43730_841	1A	51.0298	A	A	B	A	B	A	A	A	A	B	A	B	B	B	A	A	A	A	A	A	A	B	A	A	B	A	A	A	A	B	B	A	B	A	A	A	B	B	A	A	B	A	B	B	A	A
IWA2629	wsnp_Ex_c21592_30743513	1A	51.0298	A	A	B	A	B	A	A	A	A	B	A	B	B	B	A	A	A	A	A	A	A	B	A	A	B	A	A	A	A	B	B	A	B	A	A	A	B	B	A	A	B	A	B	B	A	A
IWA3538	wsnp_Ex_c3572_6533892	1A	51.0298	A	A	B	A	B	A	A	A	A	B	A	B	B	B	A	A	A	A	A	A	A	B	A	A	B	A	A	A	A	B	B	A	B	A	A	A	B	B	A	A	B	A	B	B	A	A
IWB64861	RFL_Contig5001_1099	1A	51.0298	A	A	B	A	B	A	A	A	A	B	A	B	B	B	A	A	A	A	A	A	A	B	A	A	B	A	A	A	A	B	B	A	B	A	A	A	B	B	A	A	B	A	B	B	A	A
IWB35853	IACX2325	1A	51.377	A	A	B	A	B	A	A	A	A	B	A	B	B	B	A	A	A	A	A	A	A	B	A	A	B	A	A	A	A	B	B	A	B	A	A	A	B	B	A	A	B	A	B	B	A	A
IWB57405	RAC875_c38417_246	1A	51.377	A	A	B	A	B	A	A	A	A	B	A	B	B	B	A	A	A	A	A	A	A	B	A	A	B	A	A	A	A	B	B	A	B	A	A	A	B	B	A	A	B	A	B	B	A	A
IWB27064	Excalibur_c49588_76	1A	52.0667	A	A	B	A	B	A	A	A	A	B	A	B	B	B	A	A	A	A	A	A	A	B	A	A	B	A	A	A	A	B	B	A	B	A	A	A	B	B	A	A	B	A	B	B	A	A
IWB72896	Tdurum_contig62552_256	1A	52.0667	A	A	B	A	B	A	A	A	A	-	A	B	B	B	A	A	A	A	A	A	A	B	A	A	B	A	A	A	A	B	B	A	B	A	A	A	B	B	A	A	B	A	B	B	A	A
IWB11893	BS00094681_51	1A	52.0667	A	A	B	A	B	A	A	A	A	B	A	B	B	B	A	A	A	A	A	A	A	B	A	A	B	A	A	A	A	B	B	A	B	A	A	A	B	B	A	A	B	A	B	B	-	A
IWA42	wsnp_BE403956A_Ta_2_3	1A	52.0667	A	A	B	A	B	A	A	A	A	B	A	B	B	B	A	A	A	A	A	A	A	B	A	A	B	A	A	A	A	B	B	A	B	A	A	A	B	B	A	A	B	A	B	B	-	A
IWB10918	BS00077199_51	1A	52.0667	A	A	B	A	B	A	A	A	A	B	A	B	B	B	A	A	A	A	A	A	A	B	A	A	B	A	A	A	A	B	B	A	B	A	A	A	B	B	A	A	B	A	B	B	-	A
IWA7065	wsnp_Ku_c4413_8008008	1A	52.0667	A	A	B	A	B	A	A	A	A	B	A	B	B	B	A	A	A	A	A	A	A	B	A	A	B	A	A	A	A	B	B	A	B	A	A	A	B	B	A	A	B	A	B	B	-	A
IWB12595	BS00110766_51	1A	52.0667	A	A	B	A	B	A	A	A	A	B	A	B	B	B	A	A	A	A	A	A	A	B	A	A	B	A	A	A	A	B	B	A	B	A	A	A	B	B	A	A	B	A	B	B	-	A
IWA2981	wsnp_Ex_c25628_34888253	1A	52.0667	A	A	B	A	B	A	A	A	A	B	A	B	B	B	A	A	A	A	A	A	A	B	A	A	B	A	A	A	A	B	B	A	B	A	A	A	B	B	A	A	B	A	B	B	-	A
IWB42121	Kukri_c19389_97	1A	52.0667	A	A	B	A	B	A	A	A	A	B	A	B	B	B	A	A	A	A	A	A	A	B	A	A	B	A	A	A	A	B	B	A	B	A	A	A	B	B	A	A	B	A	B	B	-	A
IWB55848	RAC875_c25799_457	1A	52.0667	A	A	B	A	B	A	A	A	A	B	A	B	B	B	A	A	A	A	A	A	A	B	A	A	B	A	A	A	A	B	B	A	B	A	A	A	B	B	A	A	B	A	B	B	-	A
IWA6972	wsnp_Ku_c37925_46679146	1A	52.0667	A	A	B	A	B	A	A	A	A	B	A	B	B	B	A	A	A	A	A	A	A	B	A	A	B	A	A	A	A	B	B	A	B	A	A	A	B	B	A	A	B	A	B	B	-	A
IWB9465	BS00065146_51	1A	52.0667	A	A	B	A	B	A	A	A	A	B	A	B	B	B	A	A	A	A	A	A	A	B	A	A	B	A	A	A	A	B	B	A	B	A	A	A	B	B	A	A	B	A	B	B	-	A
IWA4576	wsnp_Ex_c6817_11761300	1A	52.0667	A	A	B	A	B	A	A	A	A	B	A	B	B	B	A	A	A	A	A	A	A	B	A	A	B	A	A	A	A	B	B	A	B	A	A	A	B	B	A	A	B	A	B	B	-	A
IWA4577	wsnp_Ex_c6817_11762714	1A	52.0667	A	A	B	A	B	A	A	A	A	B	A	B	B	B	A	A	A	A	A	A	A	B	A	A	B	A	A	A	A	B	B	A	B	A	A	A	B	B	A	A	B	A	B	B	-	A
IWA5268	wsnp_Ex_rep_c66562_64849366	1A	52.0667	A	A	B	A	B	A	A	A	A	B	A	B	B	B	A	A	A	A	A	A	A	B	A	A	B	A	A	A	A	B	B	A	B	A	A	A	B	B	A	A	B	A	B	B	-	A
IWB3707	BobWhite_c4942_140	1A	52.0667	A	A	B	A	B	A	A	A	A	B	A	B	B	B	A	A	A	A	A	A	A	B	A	A	B	A	A	A	A	B	B	A	B	A	A	A	B	B	A	A	B	A	B	B	A	A
IWB69155	Tdurum_contig25641_409	1A	54.3938	A	A	B	A	B	A	A	A	A	B	A	B	B	B	A	A	A	A	A	A	A	B	-	A	B	A	B	A	A	B	B	A	B	A	A	A	B	B	A	A	B	A	-	B	-	A
IWB66853	Tdurum_contig10964_143	1A	55.1457	A	A	B	A	B	A	A	A	A	B	A	B	B	B	A	-	A	A	A	A	A	B	A	A	B	A	B	A	B	B	B	A	B	A	A	A	B	B	A	A	B	A	-	B	-	A
IWB73536	Tdurum_contig81875_148	1A	55.1457	A	A	B	A	B	A	A	A	A	B	A	B	B	B	A	A	A	A	A	A	A	B	A	A	B	A	B	A	B	B	B	A	B	A	A	A	B	B	A	A	B	A	-	B	-	A
IWB20307	Ex_c25689_1606	1A	55.8549	A	A	B	A	B	A	A	A	A	B	A	B	B	B	A	A	A	A	A	B	A	B	A	A	B	A	B	A	B	B	B	A	B	A	A	A	B	B	A	A	B	A	-	B	-	A
IWB34823	IAAV4099	1A	57.2941	A	A	B	A	B	A	A	A	A	B	A	B	B	B	A	A	A	A	A	B	B	B	A	A	B	A	B	A	B	B	B	A	B	A	A	A	B	B	A	A	B	A	A	B	-	A
IWB37094	JD_c17158_393	1A	57.2941	A	A	B	A	B	A	A	A	A	B	A	B	B	B	A	A	A	A	A	B	B	B	A	A	B	A	B	A	B	B	B	A	B	A	A	A	B	B	A	A	B	A	A	B	-	A
IWB42650	Kukri_c22434_513	1A	57.2941	A	A	B	A	B	A	A	A	A	B	A	B	B	B	A	A	A	A	A	B	B	B	A	A	B	A	B	A	B	B	B	A	B	A	A	A	B	B	A	A	B	A	A	B	-	A
IWA4328	wsnp_Ex_c572_1138770	1A	57.2941	A	A	B	A	B	A	A	A	A	B	A	B	B	B	A	A	A	A	A	B	B	B	A	A	B	A	B	A	B	B	B	A	B	A	A	A	B	B	A	A	B	A	A	B	-	A
IWB51724	Ra_c2895_591	1A	57.2941	A	A	B	A	B	A	A	A	A	B	A	B	B	B	A	A	A	A	A	B	B	B	A	A	B	A	B	A	B	B	B	A	B	A	A	A	B	B	A	A	B	A	A	B	-	A
IWB6632	BS00016654_51	1A	57.9984	A	A	B	A	B	-	B	A	A	B	B	B	B	B	A	A	A	A	A	B	B	B	A	A	B	A	B	A	B	B	B	A	B	A	A	A	B	B	A	A	B	A	A	B	-	A
IWB60861	RAC875_c86680_391	1A	58.348	A	A	B	A	B	-	B	A	A	B	B	B	B	B	A	A	A	A	A	B	B	B	A	A	B	A	B	A	B	B	B	A	B	A	A	A	B	B	A	A	B	A	A	B	-	A
IWB35927	IACX3496	1A	59.0572	A	A	B	A	B	-	B	A	A	B	B	B	B	B	A	A	A	A	A	B	B	B	A	A	B	A	B	A	B	B	B	A	B	A	A	A	B	B	A	A	B	A	-	B	B	B
IWB34506	IAAV213	1A	59.0572	A	A	B	A	B	-	B	A	A	B	B	B	B	B	A	A	A	A	A	B	B	B	A	A	B	A	B	A	B	B	B	A	B	A	A	A	B	B	A	A	B	A	-	B	B	B
IWA2995	wsnp_Ex_c25734_34995416	1A	59.0572	A	A	B	A	B	-	B	A	A	B	B	B	B	B	A	A	A	A	A	B	B	B	A	A	B	A	B	A	B	B	B	A	B	A	A	A	B	B	A	A	B	A	-	B	B	B
IWB34341	IAAV1225	1A	60.8565	A	A	B	A	A	-	B	A	A	B	B	B	B	B	A	A	A	A	A	B	B	B	A	A	B	A	B	A	B	B	B	A	B	A	A	A	B	B	A	A	B	A	-	B	B	B
IWA2152	wsnp_Ex_c16592_25117132	1A	60.8565	A	A	B	A	A	-	B	A	A	B	B	B	B	B	A	A	A	A	A	B	B	B	A	A	B	A	B	A	B	B	B	A	B	A	A	A	B	B	A	A	B	A	-	B	B	B
IWA6729	wsnp_Ku_c23012_32893918	1A	84.0321	A	B	B	A	B	B	B	B	B	B	B	B	B	B	A	B	A	A	A	A	-	B	A	A	B	A	A	B	A	B	A	-	B	A	B	B	B	B	B	A	B	A	B	B	A	A
IWB279	BobWhite_c11946_277	1A	85.4923	A	B	B	A	B	B	B	B	B	B	B	B	B	B	B	B	A	A	A	A	-	B	A	A	B	A	A	B	A	B	A	-	B	A	B	B	B	B	B	A	B	A	B	B	A	A
IWA601	wsnp_BM137879A_Ta_2_1	1A	85.4923	A	B	B	A	B	B	B	B	B	-	B	B	B	B	B	B	A	A	A	A	-	B	A	A	B	A	A	B	A	B	A	-	B	A	B	B	B	B	B	A	B	A	B	B	A	A
IWB599	BobWhite_c14158_112	1A	93.2139	A	B	B	A	B	A	A	A	B	B	A	B	B	B	B	B	A	A	A	A	-	B	A	A	B	A	B	B	A	B	A	-	B	A	B	B	B	B	B	A	B	A	B	A	A	A
IWB14633	CAP8_c2578_452	1A	95.8086	A	B	B	A	A	A	A	A	B	B	A	B	B	B	B	B	A	A	A	A	-	B	A	A	B	A	B	A	A	B	-	-	B	A	B	B	B	B	B	A	B	A	B	A	A	A
IWB71487	Tdurum_contig44112_1850	1A	95.8086	A	B	B	A	A	A	A	A	B	B	A	B	B	B	B	B	A	A	A	A	-	B	A	A	B	A	B	A	A	B	-	-	B	A	B	B	B	B	B	A	B	A	B	A	A	A
IWB444	BobWhite_c13039_184	1A	96.1683	A	B	B	A	A	-	A	A	B	-	A	B	A	B	B	B	A	A	A	A	-	B	A	A	B	A	B	A	A	B	-	-	B	A	B	B	B	B	B	A	B	A	B	A	A	A
IWB14141	CAP7_c4879_249	1A	96.1683	A	B	B	A	A	A	A	A	B	B	A	B	A	B	B	B	A	A	A	A	-	B	A	A	B	A	B	A	A	B	-	-	B	A	B	B	B	B	B	A	B	A	B	A	A	A
IWB71829	Tdurum_contig47620_592	1A	96.1683	A	B	B	A	A	A	A	A	B	B	A	-	A	B	B	B	A	-	A	-	-	B	A	A	B	A	B	A	A	B	-	-	B	A	B	B	B	B	B	A	B	A	B	A	A	A
IWB72587	Tdurum_contig57566_1755	1A	96.1683	A	B	B	A	A	A	A	A	B	B	A	B	A	B	B	B	A	A	A	A	-	B	A	A	B	A	B	A	A	B	-	-	B	A	B	B	B	B	B	A	B	A	B	A	A	A
IWB72586	Tdurum_contig57566_1653	1A	96.1683	A	B	B	A	A	A	A	A	B	B	A	B	A	B	B	B	A	A	A	A	-	B	A	A	B	A	B	A	A	B	-	-	B	A	B	B	B	B	B	A	B	A	B	A	A	A
IWB52960	RAC875_c102343_204	1A	96.1683	A	B	B	A	A	A	A	A	B	B	A	B	A	B	B	B	A	A	A	A	-	B	A	A	B	A	B	A	A	B	-	-	B	A	B	B	B	B	B	A	B	A	B	A	A	A
IWB6517	BS00012042_51	1A	96.1683	A	B	B	A	A	A	A	A	B	B	A	B	A	B	B	B	A	A	A	A	-	B	A	A	B	A	B	A	A	B	-	-	B	A	B	B	B	B	B	A	B	A	B	A	A	A
IWB12454	BS00109991_51	1A	99.5064	A	B	B	A	A	A	A	A	B	B	A	B	A	B	B	B	A	A	A	A	-	B	A	A	B	A	B	A	A	B	-	-	B	A	B	B	B	B	B	A	B	B	B	A	A	A
IWB6995	BS00022261_51	1A	99.5064	A	B	B	A	A	A	A	A	B	B	A	B	A	B	B	B	A	A	A	A	-	B	A	A	B	A	B	A	A	B	-	-	B	A	B	B	B	B	B	A	B	B	B	A	A	A
IWB12579	BS00110627_51	1A	99.5064	A	B	B	A	A	A	A	A	B	B	A	B	A	B	B	B	A	A	A	A	-	B	A	A	B	A	B	A	A	B	-	-	B	A	B	B	B	B	B	A	B	B	B	A	A	A
IWB31771	GENE-0262_431	1A	99.5064	A	B	B	A	A	A	A	A	B	B	A	B	A	B	B	B	A	A	A	A	-	B	A	A	B	A	B	A	A	B	-	-	B	A	B	B	B	B	B	A	B	B	B	A	A	A
IWB29579	Excalibur_c97157_137	1A	101.345	B	B	B	A	B	A	A	A	B	B	A	A	A	B	B	B	A	A	A	A	-	B	A	A	B	A	B	A	A	B	A	-	B	A	B	B	B	B	B	A	B	B	B	A	A	A
IWB29580	Excalibur_c97157_65	1A	101.345	B	B	B	A	B	A	A	A	B	B	A	A	A	B	B	B	A	A	A	A	-	B	A	A	B	A	B	A	A	B	A	-	B	A	B	B	B	B	B	A	B	B	B	A	A	A
IWA8482	wsnp_RFL_Contig3542_3718200	1A	103.145	B	B	B	A	B	B	B	B	B	B	A	A	A	B	B	B	A	A	A	A	-	B	A	A	B	A	B	A	A	A	A	-	B	A	B	B	B	B	B	A	B	B	B	A	A	A
IWA5047	wsnp_Ex_rep_c102067_87314043	1A	104.216	B	B	B	A	B	B	B	B	B	B	A	A	A	B	B	B	A	A	A	A	-	B	A	A	B	A	B	A	A	A	A	-	B	A	B	B	B	B	B	A	B	A	B	A	A	A
IWB31625	GENE-0033_233	1A	104.216	B	B	B	A	B	B	B	B	B	B	A	A	A	B	B	B	A	A	A	A	B	B	A	A	B	A	B	A	A	A	A	-	B	A	B	B	B	B	B	A	B	A	B	A	A	A
IWB73951	Tdurum_contig96086_74	1A	104.216	B	B	B	A	B	-	B	B	B	-	A	A	A	B	B	B	A	A	A	A	B	B	A	A	B	A	B	A	A	A	A	-	B	A	B	B	B	B	B	A	B	A	B	A	A	A
IWB3160	BobWhite_c41272_159	1A	104.216	B	B	B	A	B	-	B	B	B	B	A	A	A	B	B	B	A	A	A	A	B	B	A	A	B	A	B	A	A	A	A	-	B	A	B	B	B	B	B	A	B	A	B	A	A	A
IWB10300	BS00068391_51	1A	104.216	B	B	B	A	B	B	B	B	B	-	A	A	A	B	B	B	A	A	A	A	B	B	A	A	B	A	B	A	A	A	A	-	B	A	B	B	B	B	B	A	B	A	B	A	A	A
IWB11932	BS00095510_51	1A	104.216	B	B	B	A	B	B	B	B	B	B	A	A	A	B	B	B	A	A	A	A	B	B	A	A	B	A	B	A	A	A	A	-	B	A	B	B	B	B	B	A	B	A	B	A	A	A
IWB10986	BS00078085_51	1A	104.911	B	B	B	A	B	B	B	B	B	B	A	A	A	B	B	B	A	A	A	A	B	A	A	A	B	A	B	A	A	A	A	-	B	A	B	B	B	B	B	A	B	A	B	A	A	A
IWB75206	tplb0059d21_1032	1A	105.96	B	B	B	A	B	A	A	A	B	B	A	A	A	B	B	B	A	A	A	A	B	A	A	A	B	A	B	A	A	A	A	-	B	A	B	B	B	B	B	A	B	A	B	A	A	A
IWB34750	IAAV3650	1A	110.043	B	B	B	A	B	A	A	A	B	-	A	A	A	B	B	B	A	A	A	A	B	A	A	A	B	A	B	A	A	A	A	-	B	B	B	B	B	A	B	A	B	A	B	A	A	A
IWA5822	wsnp_JD_c13024_13129681	1A	110.043	B	B	B	A	B	A	A	A	B	B	A	A	A	B	B	B	A	A	A	A	B	A	A	A	B	A	B	A	A	A	A	-	B	B	B	B	B	A	B	A	B	A	B	A	A	A
IWB36967	JD_c13024_360	1A	110.043	B	B	B	A	B	A	A	A	B	B	A	A	A	B	B	B	A	A	A	A	B	A	A	A	B	A	B	A	A	A	A	-	B	B	B	B	B	A	B	A	B	A	B	A	A	A
IWB73306	Tdurum_contig75762_406	1A	110.043	B	B	B	A	B	A	A	A	B	B	A	A	A	B	B	B	A	A	A	A	B	A	A	A	B	A	B	A	A	A	A	-	B	B	B	B	B	A	B	A	B	A	B	A	A	A
IWB73305	Tdurum_contig75762_377	1A	110.043	B	B	B	A	B	A	A	A	B	B	A	A	A	B	B	B	A	A	A	A	B	A	A	A	B	A	B	A	A	A	A	-	B	B	B	B	B	A	B	A	B	A	B	A	A	A
IWA254	wsnp_BE494527A_Ta_2_1	1A	110.395	B	B	B	A	B	-	A	A	B	B	A	A	A	B	B	B	A	A	A	A	B	A	A	A	B	A	B	A	A	A	A	-	B	B	B	B	B	A	B	A	B	A	B	A	A	A
IWB23648	Excalibur_c21534_1436	1A	110.747	B	B	B	A	B	A	A	A	B	B	A	A	A	B	B	B	A	A	A	A	B	A	A	A	B	A	B	A	A	A	A	-	B	A	B	B	B	A	B	A	B	A	B	A	A	A
IWB9746	BS00066212_51	1A	110.747	B	B	B	A	B	A	A	A	B	B	A	A	A	B	B	B	A	A	A	A	B	A	A	A	B	A	B	A	A	A	A	-	B	A	B	B	-	A	B	A	B	A	B	A	A	-
IWB72526	Tdurum_contig56662_54	1A	110.747	B	B	B	A	B	A	A	A	B	B	A	A	A	B	B	B	A	A	A	A	B	A	A	A	B	A	B	A	A	A	A	-	B	A	B	B	B	A	B	A	B	A	B	A	A	A
IWA3486	wsnp_Ex_c34594_42877243	1A	110.747	B	B	B	A	B	-	A	A	B	B	A	A	A	B	B	B	A	A	A	A	B	A	A	A	B	A	B	A	A	A	A	-	B	A	B	B	B	A	B	A	B	A	B	A	A	A
IWB10613	BS00072408_51	1A	110.747	B	B	B	A	B	A	A	A	B	-	A	A	A	B	B	B	A	A	A	A	B	A	A	A	B	A	B	A	A	A	A	-	B	A	B	B	B	A	B	A	B	A	B	A	A	A
IWB9856	BS00066659_51	1A	110.747	B	B	B	A	B	A	A	A	B	B	A	A	A	B	B	B	A	A	A	A	B	A	A	A	B	A	B	A	A	A	A	-	B	A	B	B	B	A	B	A	B	A	B	A	A	A
IWA1118	wsnp_CAP7_rep_c5385_2417464	1A	110.747	B	B	B	A	B	A	A	A	B	B	A	A	A	B	B	B	A	A	A	A	-	A	A	A	B	A	B	A	A	A	A	-	B	A	B	B	B	A	B	A	B	A	B	A	A	A
IWB73444	Tdurum_contig78830_348	1A	110.747	B	B	B	A	B	A	A	A	B	B	A	A	A	B	B	B	A	A	A	A	B	A	A	A	B	A	B	A	A	A	A	-	B	A	B	B	B	A	B	A	B	A	B	A	A	A
IWB73445	Tdurum_contig78830_745	1A	110.747	B	B	B	A	B	A	A	A	B	B	A	A	A	B	B	B	A	A	A	A	B	A	A	A	B	A	B	A	A	A	A	-	B	A	B	B	B	A	B	A	B	A	B	A	A	A
IWB72160	Tdurum_contig51167_390	1A	110.747	B	B	B	A	B	A	A	A	B	B	A	A	A	B	B	B	A	A	A	A	B	A	A	A	B	A	B	A	A	A	A	-	B	A	B	B	B	A	B	A	B	A	B	A	A	A
IWB68712	Tdurum_contig18174_283	1A	110.747	B	B	B	A	B	A	A	A	B	B	A	A	A	B	B	B	A	A	A	A	B	A	A	A	B	A	B	A	A	A	A	-	B	A	B	B	B	A	B	A	B	A	B	A	A	A
IWB28698	Excalibur_c73970_243	1A	110.747	B	B	B	A	B	A	A	A	B	B	A	A	A	B	B	-	A	A	A	A	B	A	A	A	B	A	B	A	A	A	A	-	B	A	B	B	B	A	B	A	B	A	B	A	A	A
IWB13551	CAP12_c8163_118	1A	110.747	B	B	B	A	B	A	A	A	B	B	A	A	A	B	B	B	A	A	A	A	B	A	A	A	B	A	B	A	A	A	A	-	B	A	B	B	B	A	B	A	B	A	B	A	A	A
IWB42798	Kukri_c2338_533	1A	110.747	B	B	B	A	B	A	A	A	B	B	A	A	A	B	B	B	A	A	A	A	B	A	A	A	B	A	B	A	A	A	A	-	B	A	B	B	B	A	B	A	B	A	B	A	A	A
IWA4713	wsnp_Ex_c7684_13109335	1A	110.747	B	B	B	A	B	A	A	A	B	B	A	A	A	B	B	B	A	A	A	A	B	A	A	A	B	A	B	A	A	A	A	-	B	A	B	B	B	A	B	A	B	A	B	A	A	A
IWB3350	BobWhite_c44164_151	1A	110.747	B	B	B	A	B	A	A	A	B	B	A	A	A	B	B	B	A	A	A	A	B	A	A	A	B	A	B	A	A	A	A	-	B	A	B	B	B	A	B	A	B	A	B	A	A	A
IWB28418	Excalibur_c66_147	1A	110.747	B	B	B	A	B	A	A	A	B	B	A	A	A	B	B	B	A	A	A	A	B	A	A	A	B	A	B	A	A	A	A	-	B	A	B	B	B	A	B	A	B	A	B	A	A	A
IWB73482	Tdurum_contig81011_244	1A	110.747	B	B	B	A	B	A	A	A	B	B	A	A	A	B	B	B	A	A	A	A	B	A	A	A	B	A	B	A	A	A	A	-	B	A	B	B	B	A	B	A	B	A	B	A	A	A
IWA672	wsnp_CAP11_c146_160903	1A	110.747	B	B	B	A	B	A	A	A	B	B	A	A	A	B	B	B	A	A	A	A	B	A	A	A	B	A	B	A	A	A	A	-	B	A	B	B	B	A	B	A	B	A	B	A	A	A
IWB7430	BS00023114_51	1A	117.083	B	B	B	A	B	A	A	A	B	B	B	A	A	B	-	B	A	A	B	A	B	A	A	A	A	A	B	A	A	A	A	-	B	A	B	B	B	A	A	A	B	A	B	A	A	A
IWB12293	BS00106641_51	1A	117.083	B	B	B	A	B	-	A	A	B	B	B	A	A	B	-	B	A	A	B	A	B	A	A	A	A	A	B	A	A	A	A	-	B	A	B	B	B	A	A	A	B	A	B	A	A	A
IWB7275	BS00022824_51	1A	117.787	B	B	A	A	B	A	A	A	B	B	B	A	A	B	-	B	A	A	B	A	B	A	A	A	A	A	B	A	A	A	A	-	B	A	B	B	B	A	A	A	B	A	B	A	A	A
IWA4898	wsnp_Ex_c9343_15514687	1A	120.344	B	A	A	A	B	A	A	A	B	B	B	A	A	B	B	B	B	A	B	A	B	B	A	A	A	A	B	A	A	A	A	A	B	A	B	B	B	A	A	A	B	A	B	A	B	A
IWA3377	wsnp_Ex_c3201_5910642	1A	121.048	B	A	A	A	B	A	A	A	B	B	B	A	A	B	B	A	B	A	B	A	A	B	A	A	A	A	B	A	A	A	A	A	B	A	B	B	B	A	A	A	B	A	B	A	B	A
IWB9141	BS00063847_51	1A	132.797	-	A	A	A	B	A	A	A	B	A	B	A	B	A	B	A	B	A	B	A	A	B	A	A	A	A	A	A	A	A	A	A	B	A	B	B	B	A	B	B	B	A	B	B	B	A
IWB8006	BS00035273_51	1A	135.299	-	A	A	A	B	B	B	B	B	A	B	A	B	A	B	A	B	A	B	A	A	B	A	A	A	A	A	A	A	A	A	A	B	A	B	B	A	A	B	B	B	A	A	B	B	A
IWB9191	BS00064087_51	1A	135.299	-	A	A	A	B	B	B	B	B	-	B	A	B	A	B	A	B	A	B	A	A	B	A	A	A	A	A	A	A	A	A	A	B	A	B	B	A	A	B	B	B	A	A	B	B	A
IWB35476	IAAV8446	1A	135.656	-	A	A	A	B	B	B	B	B	A	B	A	B	A	B	A	B	A	B	A	A	B	A	A	A	A	A	A	A	A	A	A	B	A	B	B	A	A	B	B	B	A	A	B	B	A
IWB37	BobWhite_c10251_382	1A	137.075	-	A	A	A	B	B	B	B	B	A	B	A	B	A	B	A	B	A	B	A	A	B	A	A	A	A	A	A	A	A	A	A	B	A	B	B	A	A	B	B	B	A	A	B	B	A
IWB7489	BS00023417_51	1A	137.774	-	A	A	A	B	B	B	B	B	A	B	A	B	A	B	A	B	A	B	A	A	B	A	A	A	A	A	A	A	A	A	A	B	A	B	B	A	A	B	B	B	A	A	B	B	A
IWB45352	Kukri_c43479_207	1A	137.774	A	A	A	A	B	B	B	B	B	A	B	A	B	A	B	A	B	A	B	A	A	B	A	A	A	A	A	A	A	A	A	A	B	A	B	B	-	A	B	B	B	A	A	B	B	A
IWB11979	BS00096930_51	1A	139.193	A	A	A	A	B	B	B	B	B	A	B	A	B	A	B	A	B	A	B	A	A	B	A	A	A	A	A	A	A	A	A	A	A	A	B	B	-	B	B	B	B	A	A	B	B	A
IWB30517	Excalibur_rep_c111074_76	1B	0	B	A	A	B	B	B	B	B	A	B	A	A	A	A	B	B	A	B	A	B	A	A	A	A	A	B	B	A	B	A	A	A	A	A	A	A	B	A	A	B	B	A	A	A	A	B
IWB8589	BS00050522_51	1B	0	B	A	A	B	B	B	B	B	A	B	A	A	A	A	B	B	A	B	A	B	A	A	A	A	A	B	B	A	B	A	A	A	A	A	A	A	B	A	A	B	B	A	A	A	A	B
IWB11805	BS00093336_51	1B	0	B	A	A	B	B	B	B	B	A	B	A	A	A	A	B	B	A	B	A	B	A	A	A	A	A	B	B	A	B	A	A	A	A	A	A	A	B	A	A	B	B	A	A	A	A	B
IWB11290	BS00083177_51	1B	0	B	A	A	B	B	B	B	B	A	B	A	A	A	A	B	B	A	B	A	B	A	A	A	A	A	B	B	A	B	A	A	A	A	A	A	A	B	A	A	B	B	A	A	A	A	B
IWB34802	IAAV392	1B	0.709231	B	A	A	B	B	B	B	B	A	B	A	A	A	A	B	B	A	B	A	B	A	A	A	A	A	B	B	B	B	A	A	A	A	A	A	A	B	A	B	B	B	A	A	A	A	B
IWB73733	Tdurum_contig8791_415	1B	0.709231	B	A	A	B	B	B	B	B	A	B	A	A	A	A	B	B	A	B	A	B	A	A	A	A	A	B	B	B	B	A	A	A	A	A	A	A	B	A	B	B	B	A	A	A	A	B
IWB57219	RAC875_c3692_2287	1B	3.61088	B	A	A	B	B	B	B	B	A	B	A	A	A	A	A	B	A	B	A	B	A	A	A	A	A	B	A	B	B	A	A	B	A	A	A	A	B	A	B	B	B	A	A	A	A	B
IWB24688	Excalibur_c28255_482	1B	3.61088	B	A	A	B	B	B	B	B	A	B	A	A	A	A	A	B	A	B	A	B	A	A	A	A	A	B	A	B	B	A	A	B	A	A	A	A	B	A	B	B	B	A	A	A	A	B
IWB10589	BS00072113_51	1B	6.92436	B	A	A	B	B	B	B	B	A	B	A	A	A	A	A	B	A	B	A	A	A	A	A	A	A	B	A	B	B	A	A	B	A	A	A	A	B	A	A	A	B	A	A	A	A	B
IWB72623	Tdurum_contig58525_304	1B	7.26918	B	A	A	B	B	B	B	B	A	B	A	A	A	A	A	B	A	B	A	A	A	A	A	A	A	B	A	B	B	A	A	B	A	A	A	A	B	A	A	A	B	B	A	A	A	B
IWB72083	Tdurum_contig50555_1144	1B	7.614	B	A	A	B	B	B	B	B	A	B	A	A	A	A	A	B	A	B	A	A	A	A	A	A	A	B	A	B	B	A	A	B	A	A	A	A	B	A	A	A	B	B	A	A	A	B
IWB73278	Tdurum_contig75546_247	1B	8.65576	B	A	A	B	B	B	B	B	A	B	A	A	A	A	A	B	A	B	A	A	B	A	A	A	A	B	A	B	B	A	A	B	A	B	A	A	B	A	A	A	B	B	A	A	A	B
IWB72109	Tdurum_contig50667_671	1B	10.0449	B	A	A	B	B	B	B	B	A	B	A	A	A	A	A	B	B	B	A	A	B	A	A	A	A	B	A	B	B	A	A	B	B	B	A	A	B	A	A	A	B	B	A	A	A	B
IWB12475	BS00110121_51	1B	11.0867	B	A	A	B	B	B	B	B	A	B	A	A	A	A	A	B	B	B	A	A	B	A	A	A	A	B	A	B	B	A	A	B	B	B	A	A	A	A	A	A	B	B	A	A	A	B
IWB70675	Tdurum_contig41904_446	1B	11.7812	B	A	A	B	B	B	B	B	A	B	A	A	A	A	A	B	B	B	A	A	B	A	A	A	A	B	A	B	B	A	A	B	B	B	A	A	A	A	A	A	B	B	A	A	A	B
IWB71556	Tdurum_contig44861_581	1B	12.1284	B	A	A	B	B	B	B	B	A	B	A	A	A	A	A	B	B	B	A	A	B	A	A	A	A	B	A	B	B	A	A	B	B	B	A	A	A	A	A	A	B	B	A	A	A	B
IWB71165	Tdurum_contig42446_1915	1B	14.2879	B	A	A	B	B	B	B	B	A	B	A	A	A	A	A	B	B	B	A	A	A	A	A	A	A	B	A	B	B	A	A	B	B	A	A	A	A	A	A	A	B	A	A	A	A	B
IWB67670	Tdurum_contig12598_408	1B	14.2879	B	A	A	B	B	B	B	B	A	B	A	A	A	A	A	B	B	B	A	A	A	A	A	A	A	B	A	B	B	A	A	B	B	A	A	A	A	A	A	A	B	A	A	A	A	B
IWB67669	Tdurum_contig12598_378	1B	14.2879	B	A	A	B	B	B	B	B	A	B	A	A	A	A	A	B	B	B	A	A	A	A	A	A	A	B	A	B	B	A	A	B	B	A	A	A	A	A	A	A	B	A	A	A	A	B
IWB7923	BS00033333_51	1B	14.6303	B	A	A	B	B	B	B	B	A	B	A	A	A	A	A	B	B	B	A	A	A	A	A	A	A	B	A	B	B	A	A	B	B	A	A	A	A	A	A	A	B	A	A	A	A	B
IWB74006	Tdurum_contig9762_314	1B	19.1197	B	A	A	B	A	B	B	B	A	B	A	A	A	B	A	B	B	B	A	A	B	B	A	A	A	A	A	A	B	A	A	B	B	A	A	A	A	A	A	A	A	A	A	A	A	B
IWB74039	Tdurum_contig98378_452	1B	19.1197	B	A	A	B	A	B	B	B	A	B	A	A	A	B	A	B	B	B	A	A	B	B	A	A	A	A	A	A	B	A	A	B	B	A	A	A	A	A	A	A	A	A	A	A	A	B
IWB31721	GENE-0173_168	1B	38.2255	B	A	A	B	A	A	A	A	A	B	B	A	A	A	A	B	B	A	A	A	B	B	B	B	A	A	A	B	B	A	A	B	A	A	A	A	A	A	B	A	A	B	B	A	A	B
IWB72742	Tdurum_contig60547_330	1B	38.2255	B	A	A	B	A	A	A	A	A	B	B	A	A	A	A	B	B	A	A	A	B	B	B	B	A	A	A	B	B	A	A	B	A	A	A	A	A	A	B	A	A	B	B	A	A	B
IWB72741	Tdurum_contig60547_129	1B	38.2255	B	A	A	B	A	-	A	A	A	B	B	A	A	A	A	B	B	A	A	A	B	B	B	B	A	A	A	B	B	A	A	B	A	A	A	A	A	A	B	A	A	B	B	A	A	B
IWB72967	Tdurum_contig63991_280	1B	38.2255	B	A	A	B	A	A	A	A	A	B	B	A	A	A	A	B	B	A	A	A	B	B	B	B	A	A	A	B	B	A	A	B	A	A	A	A	A	A	B	A	A	B	B	A	A	B
IWB67968	Tdurum_contig13391_680	1B	38.2255	B	A	A	B	A	-	A	A	A	B	B	A	A	A	A	B	B	-	A	A	B	B	B	B	A	A	A	B	B	A	A	B	A	A	-	A	A	A	B	A	A	B	B	A	A	B
IWB23446	Excalibur_c20228_135	1B	38.2255	B	A	A	B	A	A	A	A	A	B	B	A	A	A	A	B	B	A	A	A	B	B	B	B	A	A	A	B	B	A	A	B	A	A	A	A	A	A	B	A	A	B	B	A	A	B
IWB67237	Tdurum_contig11692_131	1B	38.2255	B	A	A	B	A	A	A	A	A	B	B	A	A	A	A	B	B	A	A	A	B	B	B	B	A	A	A	B	B	A	A	B	A	A	A	A	A	A	B	A	A	B	B	A	A	B
IWA580	wsnp_BG607036B_Ta_1_1	1B	38.2255	B	A	A	B	A	A	A	A	A	B	B	A	A	A	A	B	B	A	A	A	B	B	B	B	A	A	A	B	B	A	A	B	A	A	A	A	A	A	B	A	A	B	B	A	A	B
IWB35740	IACX1339	1B	38.2255	B	A	A	B	A	A	A	A	A	B	B	A	A	A	A	B	B	A	A	A	B	B	B	B	A	A	A	B	B	A	A	B	A	A	A	A	A	A	B	A	A	B	B	A	A	B
IWB63614	RFL_Contig1354_663	1B	38.2255	B	A	A	B	A	A	A	A	A	B	B	A	A	A	A	B	B	A	A	A	B	B	B	B	A	A	A	B	B	A	A	B	A	A	A	A	A	A	B	A	A	B	B	A	A	B
IWB71638	Tdurum_contig45715_549	1B	38.2255	B	A	A	B	A	A	A	A	A	B	B	A	A	A	A	B	B	A	A	A	B	B	B	B	A	A	A	B	B	A	A	B	A	A	A	A	A	A	B	A	A	B	B	A	A	B
IWB71637	Tdurum_contig45715_1246	1B	38.2255	B	A	A	B	A	A	A	A	A	B	B	A	A	A	A	B	B	A	A	A	B	B	B	B	A	A	A	B	B	A	A	B	A	A	A	A	A	A	B	A	A	B	B	A	A	B
IWB6654	BS00018461_51	1B	38.2255	B	A	A	B	A	A	A	A	A	B	B	A	A	A	A	B	B	A	A	A	B	B	B	B	A	A	A	B	B	A	A	B	A	A	A	A	A	A	B	A	A	B	B	A	A	B
IWB8848	BS00061923_51	1B	38.2255	B	A	A	B	A	A	A	A	A	B	B	A	A	A	A	B	B	A	A	A	B	B	B	B	A	A	A	B	B	A	A	B	A	A	A	A	A	A	B	A	A	B	B	A	A	B
IWB3159	BobWhite_c4126_442	1B	38.2255	B	A	A	B	A	A	A	A	A	B	B	A	A	A	A	B	B	A	A	A	B	B	B	B	A	A	A	B	B	A	A	B	A	A	A	A	A	A	B	A	A	B	B	A	A	B
IWB70284	Tdurum_contig31624_230	1B	38.5826	B	A	A	B	A	A	A	A	A	B	B	A	A	A	A	B	B	A	A	A	B	B	B	B	A	A	A	B	B	A	A	B	A	A	A	A	A	A	B	A	A	B	B	A	A	B
IWB10681	BS00073603_51	1B	38.9397	B	A	A	B	A	A	A	A	A	B	B	A	A	A	A	B	B	A	A	A	B	B	B	B	A	A	A	B	B	A	A	B	A	A	A	A	A	A	B	A	A	B	B	A	A	B
IWB72174	Tdurum_contig51348_326	1B	39.644	B	A	A	B	A	A	A	A	A	B	B	A	A	A	A	B	B	A	A	A	B	B	B	B	A	A	A	B	B	A	A	B	A	A	A	A	A	A	B	A	A	B	B	A	A	B
IWB67338	Tdurum_contig11877_785	1B	40.3583	B	A	A	B	A	A	A	A	A	B	B	A	A	A	A	B	B	A	A	A	B	B	B	B	A	A	A	B	B	A	A	B	A	A	A	A	A	A	B	A	A	B	B	B	A	B
IWA2073	wsnp_Ex_c15934_24341135	1B	40.7055	B	A	A	B	A	A	A	A	A	B	B	A	A	A	A	B	B	A	A	A	B	B	B	B	A	A	A	B	B	A	A	B	A	A	A	A	A	A	B	A	A	B	B	B	A	B
IWB8612	BS00052089_51	1B	40.7055	B	A	A	B	A	A	A	A	A	B	B	A	A	A	A	B	B	A	A	A	B	B	B	B	A	A	A	B	B	A	A	B	A	A	A	A	A	A	B	A	A	B	B	B	A	B
IWB24786	Excalibur_c29029_424	1B	41.777	B	A	A	B	A	A	A	A	A	B	B	A	A	A	A	B	B	A	A	A	B	B	B	B	A	A	A	B	B	A	A	B	A	A	A	A	A	A	B	A	A	B	B	B	A	B
IWB71008	Tdurum_contig42217_127	1B	42.841	B	A	A	B	A	A	A	A	A	B	B	A	A	A	A	B	A	A	A	A	B	B	B	B	A	A	A	B	B	A	A	B	A	A	A	A	A	A	B	A	A	B	B	B	A	B
IWB71459	Tdurum_contig43910_687	1B	42.841	B	A	A	B	A	A	A	A	A	B	B	A	A	A	A	B	A	A	A	A	B	B	B	B	A	A	A	B	B	A	A	B	A	A	A	A	A	A	B	A	A	B	B	B	A	B
IWA107	wsnp_BE442716B_Ta_2_2	1B	43.5354	B	A	A	B	A	A	A	A	A	B	B	A	A	A	A	B	A	A	A	B	B	B	B	B	A	A	A	B	B	A	A	B	A	A	A	A	A	A	B	A	B	B	B	B	A	B
IWB8804	BS00060270_51	1B	43.8779	B	A	A	B	A	A	A	A	A	B	B	A	A	A	A	B	A	A	A	B	B	B	B	B	A	A	A	B	B	A	A	B	A	A	A	A	A	A	B	A	B	B	B	B	A	B
IWB7163	BS00022581_51	1B	43.8779	B	A	A	B	A	A	A	A	A	B	B	A	A	A	A	B	A	A	A	B	B	B	B	B	A	A	A	B	B	A	A	B	A	A	A	A	A	A	B	A	B	B	B	B	A	B
IWB72559	Tdurum_contig57127_56	1B	43.8779	B	A	A	B	A	A	A	A	A	B	B	A	A	A	A	B	A	A	A	B	B	B	B	B	A	A	A	B	B	A	A	B	A	A	A	A	A	A	B	A	B	B	B	B	A	B
IWB73480	Tdurum_contig8081_2331	1B	43.8779	B	A	A	B	A	A	A	A	A	B	B	A	A	A	A	B	A	A	A	B	B	B	B	B	A	A	A	B	B	A	A	B	A	A	A	A	A	A	B	A	B	B	B	B	A	B
IWB10524	BS00071083_51	1B	44.9269	B	A	A	B	A	A	A	A	A	B	B	A	A	A	A	B	A	A	A	B	B	B	B	B	A	A	A	B	B	A	A	B	A	A	A	A	A	A	B	A	B	B	B	B	A	B
IWB72596	Tdurum_contig57700_204	1B	47.4469	B	A	A	B	A	A	A	A	A	B	B	A	A	A	A	B	A	A	A	B	B	B	-	B	A	A	A	B	B	A	A	B	A	B	A	A	A	A	B	A	B	B	B	B	A	B
IWB72861	Tdurum_contig62113_343	1B	47.4469	B	A	A	B	A	A	A	A	A	B	B	A	A	A	A	B	A	A	A	B	B	B	-	B	A	A	A	B	B	A	A	B	A	B	A	A	A	A	B	A	B	B	B	B	A	B
IWB71866	Tdurum_contig48063_1879	1B	49.6221	B	A	A	B	A	A	A	A	A	B	B	A	A	A	A	B	A	A	A	A	B	B	-	B	A	A	A	B	B	B	A	B	A	B	A	A	A	A	B	A	B	B	B	B	A	B
IWB73189	Tdurum_contig70846_226	1B	51.0408	B	A	A	B	A	A	A	A	A	B	B	A	A	A	A	B	A	A	A	A	B	B	-	B	A	A	A	B	B	B	A	B	A	B	A	A	A	A	B	B	B	B	B	B	A	B
IWB7028	BS00022324_51	1B	51.0408	B	A	A	B	A	A	A	A	A	B	B	A	A	A	A	B	A	A	A	A	B	B	-	B	A	A	A	B	B	B	A	B	A	B	A	A	A	A	B	B	B	B	B	B	A	B
IWB65744	TA003801-1144	1B	51.0408	B	A	A	B	A	A	A	A	A	B	B	A	A	A	A	B	A	A	A	A	B	B	-	B	A	A	A	B	B	B	A	B	A	B	A	A	A	A	B	B	B	B	B	B	A	B
IWA3588	wsnp_Ex_c3681_6716255	1B	53.5791	B	A	A	B	A	A	A	A	A	B	A	A	A	A	A	B	A	A	A	A	B	B	-	B	A	A	B	B	B	B	B	B	A	B	A	A	A	A	B	B	B	B	B	B	A	B
IWA7721	wsnp_Ra_c2027_3943938	1B	53.5791	B	A	A	B	A	A	A	A	A	B	A	A	A	A	A	B	A	A	A	A	B	B	-	B	A	A	B	B	B	B	B	B	A	B	A	A	A	A	B	B	B	B	B	B	A	B
IWB72708	Tdurum_contig60052_184	1B	55.3655	B	A	A	B	A	A	A	A	A	B	A	A	A	A	A	B	A	A	A	A	B	B	-	B	A	A	B	B	B	B	B	B	-	B	A	A	A	A	B	B	B	B	B	B	A	B
IWA6758	wsnp_Ku_c24323_34285350	1B	55.3655	B	A	A	B	A	A	A	A	A	B	A	A	A	A	A	B	A	A	A	A	B	B	-	B	A	A	B	B	B	B	B	B	-	B	A	A	A	A	B	B	B	B	B	B	A	B
IWB31711	GENE-0142_178	1B	55.7151	B	A	A	B	A	A	A	A	A	B	A	A	A	A	A	B	A	A	A	A	B	B	-	B	A	A	B	B	B	B	B	B	-	B	A	A	A	A	B	B	B	B	B	B	A	B
IWB14021	CAP7_c3456_113	1B	55.7151	B	A	A	B	A	A	A	A	A	B	A	A	A	A	A	B	A	A	A	A	B	B	-	B	A	A	B	B	B	B	B	B	-	B	A	A	A	A	B	B	B	B	B	B	A	B
IWB72532	Tdurum_contig56873_1237	1B	55.7151	B	A	A	B	A	A	A	A	A	B	A	A	A	A	A	B	A	A	A	A	B	B	-	B	A	A	B	B	B	B	B	B	-	B	A	A	A	A	B	B	B	B	B	B	A	B
IWB10551	BS00071465_51	1B	55.7151	B	A	A	B	A	A	A	A	A	B	A	A	A	A	A	B	A	A	A	A	B	B	-	B	A	A	B	B	B	B	B	B	-	B	A	A	A	A	B	B	B	B	B	B	A	B
IWB7443	BS00023142_51	1B	55.7151	B	A	A	B	A	A	A	A	A	B	A	A	A	A	A	B	A	A	A	A	B	B	-	B	A	A	B	B	B	B	B	B	-	B	A	A	A	A	B	B	B	B	B	B	A	B
IWB7992	BS00034925_51	1B	55.7151	B	A	A	B	A	A	A	A	A	B	A	A	A	A	A	B	A	A	A	A	B	B	-	B	A	A	B	B	B	B	B	B	-	B	A	A	A	A	B	B	B	B	B	B	A	B
IWB69496	Tdurum_contig28316_442	1B	55.7151	B	A	A	B	A	A	A	A	A	B	A	A	A	A	A	B	A	A	A	A	B	B	-	B	A	A	B	B	B	B	B	B	-	B	A	A	A	A	B	B	B	B	B	B	A	B
IWB9969	BS00067146_51	1B	56.4193	B	A	A	B	A	A	A	A	A	B	A	A	A	A	A	B	B	A	A	A	B	B	-	B	A	A	B	B	B	B	B	B	-	B	A	A	A	A	B	B	B	B	B	B	A	B
IWA4556	wsnp_Ex_c6611_11451949	1B	59.3638	B	B	A	B	A	B	B	B	A	B	A	A	A	-	A	B	B	B	A	A	B	B	-	B	A	A	B	B	B	B	B	B	-	B	A	A	A	A	B	B	B	B	B	-	A	B
IWB71511	Tdurum_contig44232_132	1B	59.3638	B	B	A	B	A	B	B	B	A	B	A	A	A	-	A	B	B	B	A	A	B	B	-	B	A	A	B	B	B	B	B	B	-	B	A	A	A	A	B	B	B	B	B	-	A	B
IWB38741	Ku_c20478_390	1B	60.443	B	B	A	B	A	B	B	B	A	B	A	A	A	-	A	B	B	B	A	A	B	B	-	B	A	A	B	A	B	B	B	B	-	B	A	A	A	A	B	B	B	B	B	-	A	B
IWB12819	CAP11_c2974_53	1B	65.1813	B	B	A	B	A	B	B	B	A	A	A	A	A	-	A	B	B	B	B	A	A	B	A	B	B	A	B	A	B	B	B	B	B	B	A	A	A	A	B	B	B	B	B	-	A	B
IWA270	wsnp_BE495786B_Ta_2_2	1B	66.2528	B	B	A	B	A	B	B	B	A	A	A	A	A	-	A	B	B	B	B	A	A	B	A	B	B	A	B	A	B	B	B	B	B	B	A	A	A	A	B	B	B	B	B	-	A	B
IWB72738	Tdurum_contig60509_232	1B	66.962	B	A	A	B	A	B	B	B	A	A	A	A	A	-	A	B	B	B	B	A	A	B	A	B	B	A	B	A	B	B	B	B	B	B	A	A	A	A	B	B	B	B	B	-	A	B
IWA7836	wsnp_Ra_c29782_39115548	1B	66.962	B	A	A	B	A	B	B	B	A	A	A	A	A	-	A	B	B	B	B	A	A	B	A	B	B	A	B	A	B	B	B	B	B	B	A	A	A	A	B	B	B	B	B	-	A	B
IWB63365	RAC875_rep_c98040_92	1B	66.962	B	A	A	B	A	B	B	B	A	-	A	A	A	-	A	B	B	B	B	A	A	B	A	B	B	A	B	A	B	B	B	B	B	B	A	A	A	A	B	B	B	B	B	-	A	B
IWB72498	Tdurum_contig56276_226	1B	66.962	B	A	A	B	A	B	B	B	A	-	A	A	A	-	A	B	B	B	B	A	A	B	A	B	B	A	B	A	B	B	B	B	B	B	A	A	A	A	B	B	B	B	B	-	A	B
IWB31603	GENE-0004_125	1B	66.962	B	A	A	B	A	B	B	B	A	-	A	A	A	-	A	B	B	B	B	A	A	B	A	B	B	A	B	A	B	B	B	B	B	B	A	A	A	A	B	B	B	B	B	-	A	B
IWB7684	BS00028318_51	1B	66.962	B	A	A	B	A	B	B	B	A	-	A	A	A	-	A	B	B	B	B	A	A	B	A	B	B	A	B	A	B	B	B	B	B	B	A	A	A	A	B	B	B	B	B	-	A	B
IWB70168	Tdurum_contig31102_299	1B	69.2022	B	A	B	B	A	B	B	B	A	-	A	A	A	-	A	B	B	B	B	A	A	B	A	B	B	A	B	A	B	B	B	B	B	B	A	A	A	A	B	B	B	B	B	-	A	B
IWB73734	Tdurum_contig87938_342	1B	69.2022	B	A	B	B	A	B	B	B	A	-	A	A	A	-	A	B	B	B	B	A	A	B	A	B	B	A	B	A	B	B	B	B	B	B	A	A	A	A	B	B	B	B	B	-	A	B
IWB6215	BS00010399_51	1B	69.2022	B	A	B	B	A	B	B	B	A	-	A	-	A	-	A	B	B	B	B	A	A	B	A	B	B	A	B	A	B	B	B	B	B	B	A	A	A	A	B	B	B	B	B	-	A	B
IWB64848	RFL_Contig4977_2333	1B	70.3134	B	A	B	B	A	B	B	B	A	-	A	A	A	-	A	B	B	B	B	A	A	B	A	B	B	A	B	A	B	B	B	B	B	B	A	A	B	A	B	B	B	B	A	-	A	B
IWB9457	BS00065126_51	1B	72.6405	B	A	B	A	A	B	B	B	A	B	A	A	A	-	A	B	B	B	A	A	A	B	A	B	B	A	B	A	A	B	B	B	B	B	A	A	B	A	B	B	B	B	A	-	A	B
IWB23636	Excalibur_c21451_352	1B	72.6405	B	A	B	A	A	B	B	B	A	B	A	A	A	A	A	B	B	B	A	A	A	B	A	B	B	A	B	A	A	B	B	B	B	B	A	A	B	A	B	B	B	B	A	-	A	B
IWA775	wsnp_CAP11_c543_375403	1B	72.6405	B	A	B	A	A	B	B	B	A	B	A	A	A	A	A	B	B	B	A	A	A	B	A	B	B	A	B	A	A	B	B	B	B	B	A	A	B	A	B	B	B	B	A	-	A	B
IWB71351	Tdurum_contig42797_1576	1B	76.4355	B	A	B	A	A	B	B	B	A	B	A	A	A	B	A	B	B	B	A	B	A	B	A	B	B	B	B	A	A	B	B	B	B	B	A	A	B	A	B	B	B	B	A	-	A	B
IWB35192	IAAV6383	1B	76.4355	B	A	B	A	A	B	B	B	A	B	A	A	A	B	A	B	B	B	A	B	A	B	A	B	B	B	B	A	A	B	B	B	B	B	A	A	B	A	B	B	B	B	A	-	A	B
IWA3713	wsnp_Ex_c402_791233	1B	76.4355	B	A	B	A	A	B	B	B	A	B	A	A	A	B	A	B	B	B	A	B	A	B	A	B	B	B	B	A	A	B	B	B	B	B	A	A	B	A	B	B	B	B	A	-	A	B
IWB40124	Ku_c892_425	1B	76.4355	B	A	B	A	A	B	B	B	A	B	A	A	A	B	A	B	B	B	A	B	A	B	A	B	B	B	B	A	A	B	B	B	B	B	A	A	B	A	B	B	B	B	A	-	A	B
IWB38882	Ku_c241_1597	1B	76.4355	B	A	B	A	A	B	B	B	A	B	A	A	A	B	A	B	B	B	A	B	A	B	A	B	B	B	B	A	A	B	B	B	B	B	A	A	B	A	B	B	B	B	A	-	A	B
IWB36985	JD_c13631_863	1B	76.4355	B	A	B	A	A	B	B	B	A	B	A	A	A	B	A	B	B	B	A	B	A	B	A	B	B	B	B	A	A	B	B	B	B	B	A	A	B	A	B	B	B	B	A	-	A	B
IWB38843	Ku_c23096_550	1B	76.4355	B	A	B	A	A	B	B	B	A	B	A	A	A	B	A	B	B	B	A	B	A	B	A	B	B	B	B	A	A	B	B	B	B	B	A	A	B	A	B	B	B	B	A	-	A	B
IWB71347	Tdurum_contig42749_3287	1B	76.4355	B	A	B	A	A	B	B	B	A	B	A	A	A	B	A	B	B	B	A	B	A	B	A	B	B	B	B	A	A	B	B	B	B	B	A	A	B	A	B	B	B	B	A	-	A	B
IWA4139	wsnp_Ex_c5245_9283053	1B	76.4355	B	A	B	A	A	B	B	B	A	B	A	A	A	B	A	B	B	B	A	B	A	B	A	B	B	B	B	A	A	B	B	B	B	B	A	A	B	A	B	B	B	B	A	-	A	B
IWA4999	wsnp_Ex_rep_c101231_86636951	1B	77.1447	B	A	B	A	A	B	B	B	A	B	A	A	A	-	A	B	B	B	A	B	A	B	A	B	B	A	B	A	A	B	B	B	B	B	A	A	B	A	B	B	B	B	A	-	A	-
IWB5184	BobWhite_rep_c57575_65	1B	77.1447	B	A	B	A	A	B	B	B	A	B	A	A	A	B	A	B	B	B	A	B	A	B	A	B	B	A	B	A	A	B	B	B	B	B	A	A	B	A	B	B	B	B	A	-	A	B
IWB71903	Tdurum_contig48523_1605	1B	77.5178	B	A	B	A	A	B	B	B	A	B	A	A	A	B	A	B	B	B	A	B	A	B	A	B	B	A	B	A	A	B	B	B	B	B	A	A	B	A	B	B	B	B	A	B	A	B
IWB71595	Tdurum_contig45301_1322	1B	77.5178	B	A	B	A	A	B	B	B	A	B	A	A	A	B	A	B	B	B	A	B	A	B	A	B	B	A	B	A	A	B	B	B	B	B	A	A	B	A	B	B	B	B	A	B	A	B
IWB72552	Tdurum_contig57101_2158	1B	78.5743	B	A	B	A	A	B	B	B	B	B	A	A	B	B	A	B	B	B	A	B	A	B	A	B	B	A	B	A	A	B	B	B	B	B	A	A	B	A	B	B	B	B	A	B	A	B
IWB72549	Tdurum_contig57101_1235	1B	78.5743	B	A	B	A	A	B	B	B	B	B	A	A	B	B	A	B	B	B	A	B	A	B	A	B	B	A	B	A	A	B	B	B	B	B	A	A	B	A	B	B	B	B	A	B	A	B
IWB71367	Tdurum_contig42852_667	1B	78.5743	B	A	B	A	A	B	B	B	B	B	A	A	B	B	A	B	B	B	A	B	A	B	A	B	B	A	B	A	A	B	B	B	B	B	A	A	B	A	B	B	B	B	A	B	A	B
IWB15607	D_contig11230_635	1B	79.2785	B	A	B	A	A	B	B	B	B	B	A	A	B	B	A	B	B	B	A	B	A	B	A	B	B	A	B	A	A	B	B	B	B	B	A	A	B	A	B	B	B	B	A	B	A	B
IWB10877	BS00076394_51	1B	82.2014	A	A	B	A	A	B	B	B	B	B	A	A	B	B	A	B	A	B	A	B	A	B	A	B	B	A	B	A	A	B	B	B	B	B	A	A	B	A	B	A	B	B	A	B	A	B
IWB5761	BS00000651_51	1B	84.0269	B	A	B	A	A	B	B	B	B	B	A	A	B	B	A	B	A	A	A	B	A	B	A	B	A	A	B	A	A	B	B	B	B	B	A	A	B	A	B	A	B	B	A	B	A	B
IWB9781	BS00066338_51	1B	84.379	B	A	B	A	A	B	B	B	B	B	A	A	B	B	A	B	A	A	A	B	A	B	A	B	A	A	B	A	A	B	B	B	B	B	A	A	B	A	B	A	B	B	A	B	A	B
IWA6876	wsnp_Ku_c30494_40319867	1B	84.7215	B	A	B	A	A	B	B	B	A	B	A	A	B	B	A	B	A	A	A	B	A	B	A	B	A	A	B	A	A	B	B	B	B	B	A	A	B	A	B	A	B	B	A	B	A	B
IWB1073	BobWhite_c17644_456	1B	84.7215	B	A	B	A	A	B	B	B	A	B	A	A	B	B	A	B	A	A	A	B	A	B	A	B	A	A	B	A	A	B	B	B	B	B	A	A	B	A	B	A	B	B	A	B	A	B
IWB63380	RAC875_rep_c99365_219	1B	84.7215	B	A	B	A	A	B	B	B	A	B	A	A	B	B	A	B	A	A	A	B	A	B	A	B	A	A	B	A	A	B	B	B	B	B	A	A	B	A	B	A	B	B	A	B	A	B
IWB12322	BS00107589_51	1B	84.7215	B	A	B	A	A	B	B	B	A	B	A	A	B	B	A	B	A	A	A	B	A	B	A	B	A	A	B	A	A	B	B	B	B	B	A	A	B	A	B	A	B	B	A	B	A	B
IWB7446	BS00023148_51	1B	84.7215	B	A	B	A	A	B	B	B	A	B	A	A	B	B	A	B	A	A	A	B	A	B	A	B	A	A	B	A	A	B	B	B	B	B	A	A	B	A	B	A	B	B	A	B	A	B
IWB70045	Tdurum_contig30536_152	1B	86.8503	B	B	B	A	A	B	B	B	A	B	A	A	B	B	B	B	A	A	A	B	A	B	A	B	A	A	B	A	A	B	B	B	B	B	A	A	B	A	B	A	B	B	A	B	A	B
IWB73681	Tdurum_contig85180_99	1B	87.54	B	B	B	A	A	B	B	B	A	B	A	A	B	B	B	B	A	A	A	B	A	B	A	B	A	A	B	A	A	B	B	B	B	B	A	A	B	A	B	A	B	B	A	B	A	A
IWB3260	BobWhite_c42716_71	1B	99.8509	B	A	B	A	A	B	B	B	B	-	A	A	B	B	B	B	A	A	A	A	A	B	A	A	B	A	B	A	B	A	B	B	B	B	A	A	B	A	B	A	B	B	A	B	A	A
IWB31454	Excalibur_rep_c96924_118	1B	99.8509	B	A	B	A	A	B	B	B	B	B	A	A	B	B	B	B	A	A	A	A	A	B	A	A	B	A	B	A	B	A	B	B	B	B	A	A	B	A	B	A	B	B	A	B	A	A
IWB4407	BobWhite_c8016_301	1B	99.8509	B	A	B	A	A	B	B	B	B	B	A	A	B	B	B	B	A	A	A	A	A	B	A	A	B	A	B	A	B	A	B	B	B	B	A	A	B	A	B	A	B	B	A	B	A	A
IWB56287	RAC875_c291_647	1B	100.56	B	A	B	A	A	B	B	B	B	B	A	A	B	B	B	A	A	A	A	A	A	B	A	A	B	A	B	A	B	A	B	B	B	B	A	A	B	A	B	A	B	B	A	B	A	A
IWB71777	Tdurum_contig47253_1624	1B	100.905	B	A	B	A	A	B	B	B	B	B	A	A	B	B	B	A	A	A	A	A	A	B	A	A	B	A	B	A	B	A	B	A	B	B	A	A	B	A	B	A	B	B	A	B	A	A
IWA5861	wsnp_JD_c1544_2179305	1B	100.905	B	A	B	A	A	-	B	B	B	-	A	A	B	B	B	A	A	A	A	A	A	B	A	A	B	A	B	A	B	A	B	A	B	B	A	A	B	A	B	A	B	B	A	B	A	A
IWB70705	Tdurum_contig41945_748	1B	101.29	B	A	B	-	A	B	B	B	B	B	A	A	B	B	B	-	-	-	A	A	A	B	A	A	B	A	A	A	B	A	B	-	B	B	A	A	B	A	B	A	B	B	A	B	A	A
IWB73073	Tdurum_contig67656_387	1B	101.29	B	A	B	A	A	B	B	B	B	B	A	A	B	B	B	A	A	A	A	A	A	B	A	A	B	A	A	A	B	A	B	A	B	B	A	A	B	A	B	A	B	B	A	B	A	A
IWB71400	Tdurum_contig43232_811	1B	106.066	B	A	B	A	B	B	B	B	B	B	A	A	A	B	B	A	A	A	A	A	A	B	A	A	B	A	A	-	A	B	B	A	B	B	A	A	B	A	B	A	B	B	A	A	A	A
IWB9493	BS00065257_51	1B	106.066	B	A	B	A	B	B	B	B	B	B	A	A	A	B	B	A	A	A	A	A	A	B	A	A	B	A	A	-	A	B	B	A	B	B	A	A	B	A	B	A	B	B	A	A	A	A
IWB68408	Tdurum_contig15410_446	1B	107.484	B	A	B	A	B	B	B	B	B	B	A	A	A	B	B	A	A	A	A	A	A	B	A	A	B	A	A	-	A	B	B	A	B	B	A	A	B	A	B	A	B	B	A	A	A	A
IWB53690	RAC875_c13258_955	1B	107.832	B	B	B	A	B	B	B	B	B	B	A	A	A	B	B	A	A	A	A	A	A	B	A	A	B	A	A	-	A	B	B	A	B	B	A	A	B	A	B	A	B	B	A	A	A	A
IWB11625	BS00089790_51	1B	111.914	B	B	B	A	A	B	B	B	B	B	A	B	A	B	B	A	A	A	A	A	A	B	A	A	B	A	A	-	A	B	B	A	B	B	A	A	B	A	B	A	A	B	A	A	A	A
IWB73882	Tdurum_contig93532_89	1B	114.043	B	B	B	A	A	B	B	B	B	B	A	B	A	B	B	A	A	A	A	A	A	B	A	A	B	B	A	-	B	B	B	A	B	B	A	A	B	A	B	A	A	B	A	A	A	A
IWB65905	TA004946-0577	1B	114.043	B	B	B	A	A	B	B	B	B	B	A	B	A	B	B	A	A	A	A	A	A	B	A	A	B	B	A	-	B	B	B	A	B	B	A	A	B	A	B	A	A	B	A	A	A	A
IWB29570	Excalibur_c96904_336	1B	114.758	B	B	B	A	A	B	B	B	B	B	A	B	A	B	B	A	A	A	A	A	A	B	A	A	B	B	A	-	B	B	B	A	B	B	A	A	B	A	B	A	A	B	A	A	A	A
IWB12399	BS00109244_51	1B	121.77	B	B	B	A	B	B	B	B	B	A	A	B	B	A	B	A	A	A	A	A	A	B	A	A	A	B	A	A	B	B	B	A	A	B	A	A	B	A	B	A	A	B	A	A	A	A
IWB29151	Excalibur_c8585_701	1B	121.77	B	B	B	A	B	B	B	B	B	-	A	B	B	A	B	A	A	A	A	A	A	B	A	A	A	B	A	A	B	B	B	A	A	B	A	A	B	A	B	A	A	B	A	A	A	A
IWB12093	BS00099794_51	1B	121.77	B	B	B	A	B	B	B	B	B	A	A	B	B	A	B	A	A	A	A	A	A	B	A	A	A	B	A	A	B	B	B	A	A	B	A	A	B	A	B	A	A	B	A	A	A	A
IWB10454	BS00070285_51	1B	121.77	B	B	B	A	B	B	B	B	B	A	A	B	B	A	B	A	A	A	A	A	A	B	A	A	A	B	A	A	B	B	B	A	A	B	A	A	B	A	B	A	A	B	A	A	A	A
IWB69589	Tdurum_contig28675_228	1B	122.5	B	B	B	A	B	B	B	B	B	A	A	B	B	A	B	A	A	A	A	A	A	B	A	A	A	B	A	A	B	B	B	A	A	B	A	A	B	A	B	A	A	B	A	A	A	A
IWB72823	Tdurum_contig61829_706	1B	122.865	B	B	B	A	B	B	B	B	B	A	A	B	B	A	B	A	A	A	A	A	A	B	A	A	A	B	A	A	B	B	B	A	A	B	A	A	B	A	B	A	A	B	A	A	A	A
IWB10224	BS00068077_51	1B	122.865	B	B	B	A	B	B	B	B	B	A	A	B	B	A	B	A	A	A	A	A	A	B	A	A	A	B	A	A	B	B	B	A	A	B	A	A	B	A	B	A	A	B	A	A	A	A
IWB73738	Tdurum_contig8840_575	1B	123.584	B	B	B	A	B	B	B	B	B	A	A	B	B	A	B	A	A	A	A	A	A	B	A	A	A	B	A	A	B	B	B	A	A	B	A	A	B	A	B	A	A	B	A	A	B	A
IWB67636	Tdurum_contig12518_200	1B	123.584	B	B	B	A	B	B	B	B	B	A	A	B	B	A	B	A	A	A	A	A	A	B	A	A	A	B	A	A	B	B	B	A	A	B	A	A	B	A	B	A	A	B	A	A	B	A
IWB8840	BS00061472_51	1B	123.584	B	B	B	A	B	B	B	B	B	A	A	B	B	A	B	A	A	A	A	A	A	B	A	A	A	B	A	A	B	B	B	A	A	B	A	A	B	A	B	A	A	B	A	A	B	A
IWB7686	BS00028476_51	1B	123.584	B	B	B	A	B	B	B	B	B	A	A	B	B	A	B	A	A	A	A	A	A	B	A	A	A	B	A	A	B	B	B	A	A	B	A	A	B	A	B	A	A	B	A	A	B	A
IWB9182	BS00064052_51	1B	123.584	B	B	B	A	B	B	B	B	B	A	A	B	B	A	B	A	A	A	A	A	A	B	A	A	A	B	A	A	B	B	B	A	A	B	A	A	B	A	B	A	A	B	A	A	B	A
IWB7459	BS00023173_51	1B	123.584	B	B	B	A	B	B	B	B	B	A	A	B	B	A	B	A	A	A	A	A	A	B	A	A	A	B	A	A	B	B	B	A	A	B	A	A	B	A	B	A	A	B	A	A	B	A
IWB12812	CAP11_c2892_176	1B	124.294	B	B	B	A	B	B	B	B	B	A	A	B	B	A	B	A	A	A	A	B	A	B	A	A	A	B	A	A	B	B	B	A	A	B	A	A	B	A	B	A	A	B	A	A	B	A
IWB31692	GENE-0129_123	1B	125.069	B	B	-	A	B	B	B	B	B	A	A	-	B	A	-	A	A	A	A	B	A	B	A	A	A	B	A	A	B	B	-	A	A	B	A	A	B	A	B	A	A	B	A	A	B	A
IWB31693	GENE-0129_190	1B	125.462	B	B	-	A	B	B	B	B	B	A	A	B	B	A	B	A	A	A	A	B	A	B	A	A	A	B	A	A	-	B	B	A	A	B	A	A	B	A	-	A	A	B	A	A	B	A
IWB65780	TA004059-0492	1B	125.462	B	B	B	A	B	B	B	B	B	-	A	B	B	A	B	A	A	A	A	B	A	B	A	A	A	B	A	A	B	B	B	A	A	B	A	A	B	A	B	A	A	B	A	A	B	A
IWB68779	Tdurum_contig19203_152	1B	125.825	B	B	B	A	B	B	B	B	B	A	A	B	B	A	B	A	A	A	A	B	A	B	A	A	A	B	A	A	B	B	B	A	A	B	A	A	B	A	B	A	A	B	A	A	B	B
IWB23772	Excalibur_c22205_573	1B	127.274	B	B	A	A	B	B	B	B	B	A	A	A	B	A	B	A	A	A	A	B	A	B	A	A	A	B	A	A	B	B	B	A	A	B	A	A	B	A	B	A	A	B	A	A	B	B
IWB69702	Tdurum_contig29087_757	1B	127.984	B	B	A	A	B	B	B	B	B	A	A	A	B	A	B	A	A	A	A	B	A	B	A	A	A	B	A	A	B	B	B	A	A	B	A	A	B	A	B	A	A	B	A	A	B	B
IWB69701	Tdurum_contig29087_628	1B	127.984	B	B	A	A	B	B	B	B	B	A	A	A	B	A	B	A	A	A	A	B	A	B	A	A	A	B	A	A	B	B	B	A	A	B	A	A	B	A	B	A	A	B	A	A	B	B
IWB71943	Tdurum_contig4904_2923	1B	130.241	B	B	A	A	B	B	B	B	B	A	A	A	B	A	B	A	B	A	A	B	A	B	A	A	A	B	A	A	B	-	B	A	A	B	A	A	B	-	B	A	A	B	A	A	B	-
IWA5758	wsnp_Ex_rep_c88749_79992654	1B	142.65	B	B	B	A	-	B	B	B	B	A	A	A	A	-	A	A	B	B	B	-	A	-	A	B	A	B	A	A	B	-	B	A	B	B	A	A	B	-	B	B	A	B	B	A	B	-
IWB9040	BS00063302_51	1B	142.65	B	B	B	A	B	B	B	B	B	A	A	A	A	A	A	A	B	B	B	B	A	B	A	B	A	B	A	A	B	-	B	A	B	B	A	A	B	-	B	B	A	B	B	A	B	-
IWB11800	BS00093275_51	1B	142.65	B	B	B	A	B	B	B	B	B	A	A	A	A	A	A	A	B	B	B	B	A	B	A	B	A	B	A	A	B	B	B	A	B	B	A	A	B	-	B	B	A	B	B	A	B	-
IWB25940	Excalibur_c38500_494	1B	143.013	B	B	B	A	B	B	B	B	B	A	B	A	A	A	A	A	B	B	B	B	A	B	A	B	A	B	A	A	B	-	B	A	B	B	A	A	B	-	B	B	A	B	B	A	B	-
IWB72245	Tdurum_contig52086_342	1B	143.013	B	B	B	A	B	B	B	B	B	A	B	A	A	A	A	A	B	B	B	B	A	B	A	B	A	B	A	A	B	-	B	A	B	B	A	A	B	-	B	B	A	B	B	A	B	-
IWB72244	Tdurum_contig52086_264	1B	143.013	B	B	B	A	B	B	B	B	B	A	B	A	A	A	A	A	B	B	B	B	A	B	A	B	A	B	A	A	B	-	B	A	B	B	A	A	B	-	B	B	A	B	B	A	B	-
IWB71547	Tdurum_contig44851_593	1B	149.834	B	B	B	B	B	-	A	A	B	A	B	A	A	A	A	A	B	B	B	B	B	A	A	B	A	B	A	A	B	-	B	A	B	B	A	A	B	-	B	B	A	B	B	A	B	-
IWB38247	Ku_c11537_539	1B	150.21	B	B	B	B	B	B	A	A	B	-	B	A	A	A	A	A	B	B	B	B	B	A	A	B	A	B	A	A	B	-	B	A	B	B	A	A	A	-	B	B	A	B	B	A	B	-
IWB71898	Tdurum_contig4851_653	1B	150.21	B	B	B	B	B	-	A	A	B	A	B	A	A	A	A	A	B	B	B	B	B	A	A	B	A	B	A	A	B	-	B	A	B	B	A	A	A	-	B	B	A	B	B	A	B	-
IWA4935	wsnp_Ex_c955_1827567	1B	150.21	B	B	B	B	B	B	A	A	B	A	B	A	A	A	A	A	B	B	B	B	B	A	A	B	A	B	A	A	B	-	B	A	B	B	A	A	A	-	B	B	A	B	B	A	B	-
IWB11265	BS00082577_51	1B	150.21	B	B	B	B	B	B	A	A	B	A	B	A	A	A	A	A	B	B	B	B	B	A	A	B	A	B	A	A	B	-	B	A	B	B	A	A	A	-	B	B	A	B	B	A	B	-
IWB73820	Tdurum_contig92835_177	1B	150.578	B	B	B	B	B	B	A	A	B	A	B	A	A	-	A	A	B	B	B	B	B	A	A	B	A	B	A	A	B	-	B	-	B	B	A	A	A	-	B	B	A	B	B	A	B	-
IWB72625	Tdurum_contig58710_411	1B	150.578	B	B	B	B	B	B	A	A	B	A	B	A	A	-	A	A	B	B	B	B	B	A	A	B	A	B	A	A	B	-	B	-	B	B	A	A	A	-	B	B	A	B	B	A	B	-
IWB4373	BobWhite_c7691_195	1B	150.578	B	B	B	B	B	B	A	A	B	A	B	A	A	-	A	A	B	B	B	B	B	A	A	B	A	B	A	A	B	-	B	-	B	B	A	A	A	-	B	B	A	B	B	A	B	-
IWA965	wsnp_CAP12_c455_248396	2A	0	B	B	B	B	A	B	B	B	A	A	A	B	B	B	-	A	A	A	B	B	A	B	A	A	B	A	B	B	A	A	B	B	A	B	B	B	B	A	A	B	A	A	B	B	-	B
IWB9974	BS00067159_51	2A	3.44033	-	B	B	B	A	B	B	B	A	A	A	A	B	B	-	A	A	A	B	B	A	B	A	A	B	A	B	B	A	A	B	B	A	B	B	B	B	B	A	B	A	A	B	B	-	B
IWB7033	BS00022332_51	2A	24.9932	-	B	A	B	A	B	B	B	A	A	B	B	B	A	A	A	B	-	B	B	B	B	A	A	A	B	B	A	B	B	A	A	A	B	B	B	B	B	B	B	A	A	A	B	B	B
IWB10811	BS00075524_51	2A	25.3609	-	B	A	B	A	B	B	B	A	-	B	B	B	A	A	A	B	-	B	B	B	B	A	A	A	B	B	A	B	B	A	A	A	B	B	B	B	B	B	B	A	A	A	B	B	B
IWB9401	BS00064905_51	2A	25.3609	-	B	A	B	A	B	B	B	A	A	B	B	B	A	A	A	B	-	B	B	B	B	A	A	A	B	B	A	B	B	A	A	A	B	B	B	B	B	B	B	A	A	A	B	B	B
IWB71719	Tdurum_contig46797_585	2A	25.3609	-	B	A	B	A	B	B	B	A	A	B	B	B	A	A	A	B	-	B	B	B	B	A	A	A	B	B	A	B	B	A	A	A	B	B	B	B	B	B	B	A	A	A	B	B	B
IWB35896	IACX304	2A	34.2012	A	B	A	A	B	B	B	B	A	A	B	B	B	A	A	A	B	A	B	B	B	B	A	A	A	B	B	A	B	B	A	A	A	B	B	B	B	B	A	B	A	B	A	B	B	A
IWA2730	wsnp_Ex_c22645_31845530	2A	36.0267	B	B	A	A	B	B	B	B	A	A	B	B	B	A	A	A	B	A	B	B	B	B	A	A	A	B	B	A	B	B	A	A	A	B	B	B	B	B	A	B	A	-	A	A	B	A
IWB71778	Tdurum_contig47258_1039	2A	37.4869	B	B	A	B	B	B	B	B	A	B	B	B	B	A	A	A	A	A	B	B	B	B	A	A	A	B	B	A	B	B	A	A	A	B	B	B	B	B	A	B	A	-	A	A	B	A
IWA6566	wsnp_Ku_c15567_24224486	2A	37.4869	B	B	A	B	B	B	B	B	A	B	B	B	B	A	A	A	A	A	B	B	B	B	A	A	A	B	B	A	B	B	A	A	A	B	B	B	B	B	A	B	A	-	A	A	B	A
IWB10489	BS00070692_51	2A	39.2862	A	B	A	B	B	B	B	B	A	B	B	B	B	B	A	A	A	A	B	B	B	B	A	A	A	B	B	B	B	B	A	A	A	B	B	B	B	B	A	B	A	-	A	A	B	A
IWB8160	BS00039209_51	2A	45.6694	A	B	A	B	A	B	B	B	A	B	B	B	A	B	A	A	A	B	B	A	B	B	A	A	A	B	B	A	B	B	A	A	A	B	B	B	B	B	A	A	A	A	A	B	B	A
IWB73981	Tdurum_contig9731_121	2A	45.6694	A	B	A	B	A	B	B	B	A	B	B	B	A	B	A	A	A	B	B	A	B	B	A	A	A	B	B	A	B	B	A	A	A	B	B	B	B	B	A	A	A	A	A	B	B	A
IWB30556	Excalibur_rep_c111743_194	2A	45.6694	A	B	A	B	A	B	B	B	A	B	B	B	A	B	A	A	A	B	B	A	B	B	A	A	A	B	B	A	B	B	A	A	A	B	B	B	B	B	A	A	A	A	A	B	B	A
IWB55048	RAC875_c20700_853	2A	45.6694	A	B	A	B	A	B	B	B	A	B	B	B	A	B	A	A	A	B	B	A	B	B	A	A	A	B	B	A	B	B	A	A	A	B	B	B	B	B	A	A	A	A	A	B	B	A
IWB32426	GENE-1365_255	2A	45.6694	A	B	A	B	A	B	B	B	A	B	B	B	A	B	A	A	A	B	B	A	B	B	A	A	A	B	B	A	B	B	A	A	A	B	B	B	B	B	A	A	A	A	A	B	B	A
IWB65942	TA005222-0574	2A	45.6694	A	B	A	B	A	B	B	B	A	B	B	B	A	B	A	A	A	B	B	A	B	B	A	A	A	B	B	A	B	B	A	A	A	B	B	B	B	B	A	A	A	A	A	B	B	A
IWB72304	Tdurum_contig5311_67	2A	45.6694	A	B	A	B	A	B	B	B	A	B	B	B	A	B	A	A	A	B	B	A	B	B	A	A	A	B	B	A	B	B	A	A	A	B	B	B	B	B	A	A	A	A	A	B	B	A
IWB73597	Tdurum_contig82812_213	2A	45.6694	A	B	A	B	A	B	B	B	A	B	B	B	A	B	A	A	A	B	B	A	B	B	A	A	A	B	B	A	B	B	A	A	A	B	B	B	B	B	A	A	A	A	A	B	B	A
IWB8202	BS00039983_51	2A	45.6694	A	B	A	B	A	B	B	B	A	B	B	B	A	B	A	A	A	B	B	A	B	B	A	A	A	B	B	A	B	B	A	A	A	B	B	B	B	B	A	A	A	A	A	B	B	A
IWA5495	wsnp_Ex_rep_c68113_66877517	2A	46.0191	A	B	A	B	A	B	B	B	A	B	B	B	A	B	A	A	A	B	B	A	B	B	A	A	A	B	B	A	B	A	A	A	A	B	B	B	B	B	A	A	A	A	A	B	B	A
IWB49021	Kukri_rep_c104727_91	2A	46.0191	A	B	A	B	A	B	B	B	A	B	B	B	A	B	A	A	A	B	B	A	B	B	A	A	A	B	B	A	B	A	A	A	A	B	B	B	B	B	A	A	A	A	A	B	B	A
IWB6749	BS00021739_51	2A	48.5759	A	B	A	B	A	B	B	B	A	B	B	B	A	B	A	A	A	B	B	A	B	B	A	A	A	B	B	A	B	A	A	A	A	B	B	B	B	B	A	B	B	A	A	B	A	B
IWB26523	Excalibur_c44080_386	2A	50.7511	A	B	A	B	A	B	B	B	A	B	B	B	A	B	A	A	A	B	B	A	B	B	A	A	A	B	B	B	B	A	A	A	A	B	B	B	B	B	A	B	A	A	A	B	A	B
IWA3803	wsnp_Ex_c41913_48628389	2A	52.15	A	B	A	A	A	B	B	B	A	B	B	B	A	B	A	A	A	B	B	A	B	B	A	A	A	B	B	B	B	A	A	A	A	B	B	B	B	B	A	B	A	A	A	B	A	B
IWB45265	Kukri_c42616_467	2A	52.4972	A	B	A	A	A	B	B	B	A	B	B	B	A	A	A	A	A	B	B	A	B	B	A	A	A	B	B	B	B	A	A	A	A	B	B	B	B	B	A	B	A	A	A	B	A	B
IWB69592	Tdurum_contig28682_120	2A	53.1916	A	B	A	A	A	B	B	B	A	B	B	B	A	A	A	A	A	B	B	A	B	B	A	A	A	B	B	B	B	A	A	A	A	B	B	B	B	A	A	B	A	A	A	B	A	B
IWB23707	Excalibur_c21872_135	2A	53.1916	A	B	A	A	A	B	B	B	A	B	B	B	A	A	A	A	A	B	B	A	B	B	A	A	A	B	B	B	B	A	A	A	A	B	B	B	B	A	A	B	A	A	A	B	A	B
IWA2758	wsnp_Ex_c22862_32074455	2A	63.1496	A	B	A	B	A	B	B	B	A	B	B	B	A	A	A	A	A	A	B	A	B	B	A	A	A	B	B	A	A	B	A	A	A	B	B	B	B	A	A	B	A	A	A	A	A	B
IWA534	wsnp_BG263521A_Ta_2_2	2A	63.1496	A	B	A	B	A	B	B	B	A	B	B	B	A	A	A	A	A	A	B	A	B	B	A	A	A	B	B	A	A	B	A	A	A	B	B	B	B	A	A	B	A	A	A	A	A	B
IWB32157	GENE-0940_83	2A	66.0724	A	B	A	B	A	A	A	A	A	B	B	B	A	A	A	A	B	A	B	A	B	B	A	A	A	B	B	A	A	B	A	A	A	B	B	B	B	A	A	B	A	A	A	A	A	B
IWB14447	CAP7_rep_c6939_197	2A	66.0724	A	B	A	B	A	A	A	A	A	B	B	B	A	A	A	A	B	A	B	A	B	B	A	A	A	B	B	A	A	B	A	A	A	B	B	B	B	A	A	B	A	A	A	A	A	B
IWB20771	Ex_c4639_2631	2A	66.0724	A	B	A	B	A	-	A	A	A	B	B	B	A	A	A	A	B	A	B	A	B	B	A	A	A	B	B	A	A	B	A	A	A	B	B	B	B	A	A	B	A	A	A	A	A	B
IWB12880	CAP11_c4420_138	2A	66.0724	A	B	A	B	A	A	A	A	A	B	B	B	A	A	A	A	B	A	B	A	B	B	A	A	A	B	B	A	A	B	A	A	A	B	B	B	B	A	A	B	A	A	A	A	A	B
IWB13915	CAP7_c239_267	2A	66.0724	A	B	A	B	A	A	A	A	A	B	B	B	A	A	A	A	B	A	B	A	B	B	A	A	A	B	B	A	A	B	A	A	A	B	B	B	B	A	A	B	A	A	A	A	A	B
IWB52829	Ra_c9532_3551	2A	66.0724	A	B	A	B	A	A	A	A	A	B	B	B	A	A	A	A	B	A	B	A	B	B	A	A	A	B	B	A	A	B	A	A	A	B	B	B	B	A	A	B	A	A	A	A	A	B
IWB52560	Ra_c7199_1504	2A	66.0724	A	B	A	B	A	A	A	A	A	B	B	B	A	A	A	A	B	A	B	A	B	B	A	A	A	B	B	A	A	B	A	A	A	B	B	B	B	A	A	B	A	A	A	A	A	B
IWB23105	Excalibur_c18267_118	2A	66.0724	A	B	A	B	A	A	A	A	A	B	B	B	A	A	A	A	B	A	B	A	B	B	A	A	A	B	B	A	A	B	A	A	A	B	B	B	B	A	A	B	A	A	A	A	A	B
IWA336	wsnp_BE517627A_Ta_2_1	2A	66.0724	A	B	A	B	A	A	A	A	A	B	B	B	A	A	A	A	B	A	B	A	B	B	A	A	A	B	B	A	A	B	A	A	A	B	B	B	B	A	A	B	A	A	A	A	A	B
IWA1252	wsnp_CD452951A_Ta_2_1	2A	66.0724	A	B	A	B	A	A	A	A	A	B	B	B	A	A	A	A	B	A	B	A	B	B	A	A	A	B	B	A	A	B	A	A	A	B	B	B	B	A	A	B	A	A	A	A	A	B
IWB74893	tplb0047f03_349	2A	66.4126	A	B	A	B	A	A	A	A	A	B	B	B	A	A	A	A	B	A	B	A	B	B	A	A	A	B	B	A	A	B	A	A	A	B	B	B	B	A	A	B	A	A	A	A	A	B
IWB51950	Ra_c37220_262	2A	66.4126	A	B	A	B	A	A	A	A	A	B	B	B	A	A	A	A	B	A	B	A	B	B	A	A	A	B	B	A	A	B	A	A	A	B	B	B	B	A	A	B	A	A	A	A	A	B
IWB73280	Tdurum_contig75565_1388	2A	66.4126	A	B	A	B	A	A	A	A	A	B	B	B	A	A	A	A	B	A	B	A	B	B	A	A	A	B	B	A	A	B	A	A	A	B	B	B	B	A	A	B	A	A	A	A	A	B
IWB30726	Excalibur_rep_c66270_789	2A	66.4126	A	B	A	B	A	A	A	A	A	B	B	B	A	A	A	A	B	A	B	A	B	B	A	A	A	B	B	A	A	B	A	A	A	B	B	B	B	A	A	B	A	A	A	A	A	B
IWB13733	CAP7_c11156_108	2A	66.4126	A	B	A	B	A	A	A	A	A	B	B	B	A	A	A	A	B	A	B	A	B	B	A	A	A	B	B	A	A	B	A	A	A	B	B	B	B	A	A	B	A	A	A	A	A	B
IWB72292	Tdurum_contig52873_265	2A	66.4126	A	B	A	B	A	A	A	A	A	B	B	B	A	A	A	A	B	A	B	A	B	B	A	A	A	B	B	A	A	B	A	A	A	B	B	B	B	A	A	B	A	A	A	A	A	B
IWA1532	wsnp_Ex_c11728_18862315	2A	66.4126	A	B	A	B	A	A	A	A	A	B	B	B	A	A	A	A	B	A	B	A	B	B	A	A	A	B	B	A	A	B	A	A	A	B	B	B	B	A	A	B	A	A	A	A	A	B
IWA309	wsnp_be498599A_Ta_2_2	2A	66.4126	A	B	A	B	A	A	A	A	A	B	B	B	A	A	A	A	B	A	B	A	B	B	A	A	A	B	B	A	A	B	A	A	A	B	B	B	B	A	A	B	A	A	A	A	A	B
IWB1463	BobWhite_c2099_337	2A	66.4126	A	B	A	B	A	A	A	A	A	B	B	B	A	A	A	A	B	A	B	A	B	B	A	A	A	B	B	A	A	B	A	A	A	B	B	B	B	A	A	B	A	A	A	A	A	B
IWA5273	wsnp_Ex_rep_c66615_64916512	2A	66.4126	A	B	A	B	A	A	A	A	A	B	B	B	A	A	A	A	B	A	B	A	B	B	A	A	A	B	B	A	A	B	A	A	A	B	B	B	B	A	A	B	A	A	A	A	A	B
IWB51504	Ra_c22880_760	2A	66.4126	A	B	A	B	A	A	A	A	A	B	B	B	A	A	A	A	B	A	B	A	B	B	A	A	A	B	B	A	A	B	A	A	A	B	B	B	B	A	A	B	A	A	A	A	A	B
IWA5303	wsnp_Ex_rep_c66800_65171259	2A	67.4472	A	B	A	B	A	A	A	A	A	B	B	B	A	A	A	A	B	A	B	A	B	B	A	A	A	B	B	A	A	B	A	A	A	B	B	B	B	A	A	B	A	A	A	A	A	B
IWB35580	IAAV9024	2A	67.7896	A	B	A	B	A	A	A	A	A	B	B	B	A	A	A	A	B	A	B	A	B	B	A	A	A	B	B	A	A	B	A	A	A	B	B	B	B	A	A	B	A	A	A	A	A	B
IWB65363	TA001220-1276	2A	67.7896	A	B	A	B	A	A	A	A	A	B	B	B	A	A	A	A	B	A	B	A	B	B	A	A	A	B	B	A	A	B	A	A	A	B	B	B	B	A	A	B	A	A	A	A	A	B
IWB34874	IAAV444	2A	68.1321	A	B	A	B	A	A	A	A	A	B	B	B	A	A	A	A	B	A	B	A	B	B	A	A	A	B	B	A	A	B	A	A	A	B	B	B	B	A	A	B	A	A	A	A	A	B
IWB10949	BS00077693_51	2A	69.1811	A	B	A	B	A	A	A	A	A	B	B	B	A	A	A	A	B	A	B	B	B	B	A	A	A	B	B	A	A	B	A	A	A	B	B	B	B	A	A	A	A	-	A	A	A	B
IWB8846	BS00061867_51	2A	69.5236	A	B	A	B	A	A	A	A	A	B	B	B	A	A	A	A	B	A	B	B	B	B	A	A	A	B	B	A	A	B	A	A	A	B	B	B	B	A	A	A	A	B	A	A	A	B
IWB32272	GENE-1166_304	2A	70.2085	A	B	A	B	A	A	A	A	A	B	B	B	A	A	A	A	B	A	B	B	B	B	A	A	A	B	A	A	A	B	A	A	A	B	B	B	B	A	A	A	A	B	A	A	A	B
IWB32273	GENE-1166_419	2A	70.2085	A	B	A	B	A	A	A	A	A	B	B	B	A	A	A	A	B	A	B	B	B	B	A	A	A	B	A	A	A	B	A	A	A	B	B	B	B	A	A	A	A	B	A	A	A	B
IWA32	wsnp_BE403597A_Ta_2_1	2A	72.3373	A	B	A	A	A	A	A	A	A	B	A	B	A	A	A	A	B	A	B	B	B	B	A	A	A	B	A	A	A	B	A	A	A	B	B	B	B	B	A	A	A	B	A	A	A	B
IWB23044	Excalibur_c1793_97	2A	72.3373	A	B	A	A	A	A	A	A	A	B	A	B	A	A	A	A	B	A	B	B	B	B	A	A	A	B	A	A	A	B	A	A	A	B	B	B	B	B	A	A	A	B	A	A	A	B
IWB35496	IAAV8552	2A	72.3373	A	B	A	A	A	A	A	A	A	B	A	B	A	A	A	A	B	A	B	B	B	B	A	A	A	B	A	A	A	B	A	A	A	B	B	B	B	B	A	A	A	B	A	A	A	B
IWB11422	BS00085765_51	2A	72.3373	A	B	A	A	A	A	A	A	A	B	A	B	A	A	A	A	B	A	B	B	B	B	A	A	A	B	A	A	A	B	A	A	A	B	B	B	B	B	A	A	A	B	A	A	A	B
IWB59834	RAC875_c63975_307	2A	72.3373	A	B	A	A	A	A	A	A	A	B	A	B	A	A	A	A	B	A	B	B	B	B	A	A	A	B	A	A	A	B	A	A	A	B	B	B	B	B	A	A	A	B	A	A	A	B
IWA812	wsnp_CAP11_c838_518859	2A	73.0223	A	B	A	A	A	A	A	A	A	B	A	B	A	A	A	A	B	A	B	B	B	B	A	A	A	B	A	A	A	B	A	A	A	B	B	B	B	B	A	A	A	B	A	A	A	B
IWB8290	BS00041816_51	2A	79.2522	A	B	A	A	A	-	A	A	A	B	-	B	A	A	A	A	B	-	B	B	B	B	-	A	A	B	A	A	A	B	A	A	A	B	B	B	A	B	A	A	A	B	A	A	A	B
IWB66316	Tdurum_contig101781_53	2A	81.6161	A	B	A	A	A	A	A	A	A	B	A	B	A	A	A	A	B	A	B	B	-	B	A	A	A	B	A	B	A	B	A	A	A	B	B	B	A	B	A	B	A	B	A	A	A	B
IWB72154	Tdurum_contig5114_319	2A	92.7977	A	B	A	A	B	-	A	B	A	-	A	-	A	A	A	B	B	-	B	B	-	-	-	B	A	A	A	B	A	B	A	A	A	B	B	B	A	B	A	B	A	B	A	A	A	A
IWB22730	Excalibur_c1604_2710	2A	107.157	B	A	A	A	B	-	A	B	B	B	A	B	A	A	A	B	A	A	B	B	B	B	A	A	A	B	B	A	A	B	A	A	A	B	B	B	-	B	B	B	A	B	A	A	A	B
IWA542	wsnp_BG274584A_Ta_2_4	2A	107.157	B	A	A	A	B	B	A	B	B	B	A	B	A	-	A	B	A	A	B	B	B	B	A	A	A	B	B	A	A	B	-	A	-	B	B	B	B	B	B	B	A	B	A	-	A	B
IWB11977	BS00096882_51	2A	110.126	B	A	A	A	B	-	A	-	B	B	A	B	A	A	A	B	A	A	B	B	B	B	A	A	A	A	B	A	A	B	A	A	A	B	B	B	-	B	B	B	A	B	A	A	A	B
IWB10941	BS00077597_51	2A	110.486	B	A	A	A	B	-	A	-	B	B	A	B	A	A	A	B	A	A	B	B	B	B	A	A	A	A	B	A	A	B	A	A	A	B	B	B	-	B	B	B	A	B	A	A	A	B
IWB1460	BobWhite_c20952_105	2A	111.946	B	A	A	A	B	-	A	-	B	B	A	B	A	A	A	B	A	A	B	B	B	B	A	A	A	A	B	A	A	B	A	A	A	B	B	B	-	A	B	B	A	B	A	A	A	B
IWB7714	BS00029332_51	2A	111.946	B	A	A	A	B	-	A	-	B	B	A	B	A	A	A	B	A	A	B	B	B	B	A	A	A	A	B	A	A	B	A	A	A	B	B	B	-	A	B	B	A	B	A	A	A	B
IWB28643	Excalibur_c7282_512	2A	115.386	B	A	A	A	B	-	A	-	B	B	A	B	B	A	A	B	A	B	B	B	B	B	A	A	A	A	B	A	A	B	A	A	A	A	B	B	A	A	B	B	A	B	A	A	A	B
IWB36821	Jagger_c9554_114	2A	116.101	B	A	A	A	B	-	A	-	B	B	A	B	B	A	A	B	A	B	B	B	B	B	A	A	A	A	B	A	A	B	A	A	A	A	B	B	B	A	B	B	A	B	A	A	A	B
IWB36583	Jagger_c4026_255	2A	116.101	B	A	A	A	B	-	A	-	B	B	A	B	B	A	A	B	A	B	B	B	B	B	A	A	A	A	B	A	A	B	A	A	A	A	B	B	B	A	B	B	A	B	A	A	A	B
IWB36584	Jagger_c4026_328	2A	116.101	B	A	A	A	B	-	A	-	B	B	A	B	B	A	A	B	A	B	B	B	B	B	A	A	A	A	B	A	A	B	A	A	A	A	B	B	B	A	B	B	A	B	A	A	A	B
IWB26349	Excalibur_c42512_584	2A	116.101	B	A	A	A	B	-	A	B	B	B	A	B	B	A	A	B	A	B	B	B	B	B	-	A	-	A	B	A	A	B	A	A	A	A	B	B	B	A	B	B	A	B	A	A	A	B
IWB11143	BS00080752_51	2A	117.519	B	A	A	A	B	-	A	-	B	B	B	B	B	A	A	B	A	B	B	B	B	B	A	A	A	A	B	A	A	B	A	A	A	A	B	B	A	A	B	B	A	B	A	A	A	B
IWB11193	BS00081506_51	2A	117.869	B	A	A	A	B	-	A	-	B	B	B	B	B	A	A	B	A	B	B	B	B	B	A	A	A	A	B	A	A	B	A	A	A	A	B	B	A	A	B	B	A	B	A	A	A	B
IWB38933	Ku_c25175_1248	2A	120.835	B	A	A	B	B	-	A	-	B	B	B	B	B	A	A	B	A	B	B	B	B	B	A	A	A	A	B	A	A	B	A	A	A	A	B	B	A	A	A	B	A	B	A	A	A	B
IWB73879	Tdurum_contig93508_295	2A	136.616	B	A	A	B	B	A	A	A	B	B	B	A	A	A	A	B	B	A	A	B	B	B	A	A	B	A	A	A	A	B	A	A	A	B	B	B	B	A	A	B	A	B	A	A	A	B
IWB6997	BS00022265_51	2A	136.616	B	A	A	B	B	A	A	A	B	B	B	A	A	A	A	B	B	A	A	B	B	B	A	A	B	A	A	A	A	B	A	A	A	B	B	B	B	A	A	B	A	B	A	A	A	B
IWB72722	Tdurum_contig60298_219	2A	136.616	B	A	A	B	B	A	A	A	B	B	B	A	A	A	A	B	B	A	A	B	B	B	A	A	B	A	A	A	A	B	A	A	A	B	B	B	B	A	A	B	A	B	A	A	A	B
IWA2051	wsnp_Ex_c15681_24015303	2A	136.965	B	A	A	B	B	A	A	A	B	B	B	A	A	A	A	B	B	A	A	B	B	B	A	A	B	A	A	A	A	B	A	A	A	B	B	B	B	A	A	B	A	B	A	A	A	B
IWB72757	Tdurum_contig6086_269	2A	139.931	B	A	A	B	B	A	A	A	B	B	B	A	A	A	A	B	B	A	A	B	B	A	A	A	B	A	B	A	A	A	A	A	B	B	B	B	B	A	A	B	A	B	A	A	A	A
IWB7758	BS00030165_51	2A	139.931	B	A	A	B	B	A	A	A	B	B	B	A	A	A	A	B	B	A	A	B	B	A	A	A	B	A	B	A	A	A	A	A	B	B	B	B	B	A	A	B	A	B	A	A	A	A
IWB49434	Kukri_rep_c110061_249	2A	139.931	B	A	A	B	B	A	A	A	B	B	B	A	A	A	A	B	B	A	A	B	B	A	A	A	B	A	B	A	A	A	A	A	B	B	B	B	B	A	A	B	A	B	A	A	A	A
IWB49774	Kukri_rep_c68300_216	2A	139.931	B	A	A	B	B	A	A	A	B	B	B	A	A	A	A	B	B	A	A	B	B	A	A	A	B	A	B	A	A	A	A	A	B	B	B	B	B	A	A	B	A	B	A	A	A	A
IWB71948	Tdurum_contig49145_914	2A	140.284	B	A	A	B	B	A	A	A	B	B	B	A	A	A	A	B	B	A	A	B	B	A	A	A	B	A	B	A	A	A	A	A	B	B	B	B	B	A	A	B	A	B	A	A	A	A
IWB7065	BS00022409_51	2A	140.284	B	A	A	B	B	A	A	A	B	B	B	A	A	A	A	B	B	A	A	B	B	A	A	A	B	A	B	A	A	A	A	A	B	B	B	B	B	A	A	B	A	B	A	A	A	A
IWB35910	IACX3245	2A	141.347	B	A	A	B	B	-	A	A	B	B	B	A	A	A	A	B	B	A	A	B	B	A	A	A	B	A	A	A	A	A	A	A	B	A	B	B	B	A	A	B	A	B	A	A	A	A
IWB72933	Tdurum_contig63071_67	2A	141.347	B	A	A	B	B	A	A	A	B	B	B	A	A	A	A	B	B	A	A	B	B	A	A	A	B	A	A	A	A	A	A	A	B	A	B	B	B	A	A	B	A	B	A	A	A	A
IWB73747	Tdurum_contig8926_1118	2A	141.71	B	A	A	B	B	A	A	A	B	B	B	A	A	A	A	B	B	A	A	B	B	A	A	A	B	A	A	A	A	A	A	A	B	A	B	B	B	A	A	B	A	B	A	A	A	A
IWB8635	BS00053834_51	2A	142.429	B	A	A	B	B	A	A	A	B	B	B	A	A	A	A	B	B	A	A	B	B	A	A	A	B	A	A	A	A	A	A	A	B	A	B	B	B	A	A	B	A	B	A	A	A	A
IWB8636	BS00053835_51	2A	142.429	B	A	A	B	B	A	A	A	B	B	B	A	A	A	A	B	B	A	A	B	B	A	A	A	B	A	A	A	A	A	A	A	B	A	B	B	B	A	A	B	A	B	A	A	A	A
IWB73777	Tdurum_contig9212_1287	2A	143.478	B	A	A	B	B	A	A	A	B	B	B	A	B	A	A	B	B	A	A	B	B	A	A	A	B	A	A	A	A	A	A	A	B	A	B	B	A	A	A	B	A	B	A	A	A	A
IWB73776	Tdurum_contig9212_1196	2A	143.478	B	A	A	B	B	A	A	A	B	B	B	A	B	A	A	B	B	A	A	B	B	A	A	A	B	A	A	A	A	A	A	A	B	A	B	B	A	A	A	B	A	B	A	A	A	A
IWB73782	Tdurum_contig9212_527	2A	143.478	B	A	A	B	B	A	A	A	B	B	B	A	B	A	A	B	B	A	A	B	B	A	A	A	B	A	A	A	A	A	A	A	B	A	B	B	A	A	A	B	A	B	A	A	A	A
IWB73779	Tdurum_contig9212_182	2A	143.478	B	A	A	B	B	A	A	A	B	B	B	A	B	A	A	B	B	A	A	B	B	A	A	A	B	A	A	A	A	A	A	A	B	A	B	B	A	A	A	B	A	B	A	A	A	A
IWB72339	Tdurum_contig54056_501	2A	147.189	B	A	A	A	B	A	A	A	B	-	B	A	B	A	A	B	B	A	A	B	B	A	A	A	B	A	A	A	A	A	A	A	B	B	B	B	A	A	A	B	A	B	A	A	A	A
IWA6797	wsnp_Ku_c26323_36285601	2A	147.883	B	A	A	A	B	A	A	A	B	A	B	A	B	A	A	B	B	A	A	B	B	A	A	A	B	A	A	A	A	A	A	A	B	B	B	B	A	A	A	B	A	B	A	A	A	A
IWB3216	BobWhite_c42181_327	2A	148.225	B	A	A	A	B	A	A	A	B	A	B	A	B	A	A	B	B	A	A	B	B	A	A	A	B	A	A	A	A	A	A	A	B	B	B	B	A	A	A	B	A	B	A	A	A	A
IWB26593	Excalibur_c44834_80	2A	148.225	B	A	A	A	B	A	A	A	B	A	B	A	B	A	A	B	B	A	A	B	B	A	A	A	B	A	A	A	A	A	A	A	B	B	B	B	A	A	A	B	A	B	A	A	A	A
IWB26001	Excalibur_c39151_104	2A	148.225	B	A	A	A	B	A	A	A	B	A	B	A	B	A	A	B	B	A	A	B	B	A	A	A	B	A	A	A	A	A	A	A	B	B	B	B	A	A	A	B	A	B	A	A	A	A
IWB35144	IAAV6102	2A	148.225	B	A	A	A	B	A	A	A	B	A	B	A	B	A	A	B	B	A	A	B	B	A	A	A	B	A	A	A	A	A	A	A	B	B	B	B	A	A	A	B	A	B	A	A	A	A
IWB12001	BS00097473_51	2A	148.225	B	A	A	A	B	A	A	A	B	A	B	A	B	A	A	B	B	A	A	B	B	A	A	A	B	A	A	A	A	A	A	A	B	B	B	B	A	A	A	B	A	B	A	A	A	A
IWB72261	Tdurum_contig52350_296	2A	148.225	B	A	A	A	B	A	A	A	B	A	B	A	B	A	A	B	B	A	A	B	B	A	A	A	B	A	A	A	A	A	A	A	B	B	B	B	A	A	A	B	A	B	A	A	A	A
IWB72264	Tdurum_contig52350_902	2A	148.225	B	A	A	A	B	A	A	A	B	A	B	A	B	A	A	B	B	A	A	B	B	A	A	A	B	A	A	A	A	A	A	A	B	B	B	B	A	A	A	B	A	B	A	A	A	A
IWA6600	wsnp_Ku_c16547_25454123	2A	148.225	B	A	A	A	B	A	A	A	B	A	B	A	B	A	A	B	B	A	A	B	B	A	A	A	B	A	A	A	A	A	A	A	B	B	B	B	A	A	A	B	A	B	A	A	A	A
IWA319	wsnp_BE498892A_Ta_2_25	2A	148.225	B	A	A	A	B	A	A	A	B	A	B	A	B	A	A	B	B	A	A	B	B	A	A	A	B	A	A	A	A	A	A	A	B	B	B	B	A	A	A	B	A	B	A	A	A	A
IWB72114	Tdurum_contig50720_482	2A	148.225	B	A	A	A	B	A	A	A	B	A	B	A	B	A	A	B	B	A	A	B	B	A	A	A	B	A	A	A	A	A	A	A	B	B	B	B	A	A	A	B	A	B	A	A	A	A
IWB73790	Tdurum_contig92425_1324	2A	152.17	B	A	A	A	B	A	A	A	B	A	A	A	B	A	A	A	B	A	A	B	B	A	A	A	A	A	B	A	A	A	A	A	B	B	A	A	A	A	A	B	-	B	A	A	A	B
IWB73799	Tdurum_contig92425_431	2A	152.17	B	A	A	A	B	A	A	A	B	A	A	A	B	A	A	A	B	A	A	B	B	A	A	A	A	A	-	A	A	A	A	A	B	B	A	A	A	A	A	B	-	B	A	A	A	-
IWB71583	Tdurum_contig45196_487	2A	153.62	B	A	A	A	B	A	A	A	B	A	A	A	B	A	A	A	B	A	A	B	B	A	A	A	A	A	B	B	A	A	A	A	B	B	A	A	A	A	A	B	-	B	A	A	A	B
IWB11240	BS00082153_51	2A	155.86	B	B	A	A	B	A	A	A	B	A	A	A	B	A	A	A	B	-	A	B	B	A	A	A	A	A	B	B	A	A	A	A	B	B	A	A	A	A	A	B	-	B	A	A	A	B
IWB7101	BS00022467_51	2A	155.86	B	B	A	A	B	A	A	A	B	A	A	A	B	A	A	A	B	A	A	B	B	A	A	A	A	A	B	B	A	A	A	A	B	B	A	A	A	A	A	B	-	B	A	A	A	B
IWB70730	Tdurum_contig42013_538	2A	155.86	B	B	A	A	B	A	A	A	B	A	A	A	B	A	A	A	B	A	A	B	B	A	A	A	A	A	B	B	A	A	A	A	B	B	A	A	A	A	A	B	-	B	A	A	A	B
IWA3688	wsnp_Ex_c3964_7181151	2A	157.331	B	B	A	A	B	A	A	A	B	A	A	A	B	A	A	A	B	A	A	B	B	A	B	B	A	A	B	B	A	B	A	A	B	B	A	A	A	A	A	B	-	B	A	A	A	B
IWB31831	GENE-0361_486	2A	159.926	A	B	A	A	B	A	A	A	B	A	A	A	B	A	A	A	B	A	A	B	B	A	B	B	A	A	B	B	A	B	A	A	B	A	A	A	A	A	A	B	-	B	A	A	A	B
IWB65399	TA001453-0801	2A	159.926	A	B	A	A	B	A	A	A	B	A	A	A	B	A	A	A	B	A	A	B	B	A	B	B	A	A	B	B	A	B	A	A	B	A	A	A	A	A	A	B	A	B	A	A	A	B
IWB7669	BS00028028_51	2B	0	A	B	A	A	A	B	B	B	A	A	B	B	A	A	B	A	B	B	B	A	B	B	A	A	A	B	A	A	B	B	A	A	A	A	A	A	A	B	B	A	B	B	B	B	B	A
IWB26054	Excalibur_c39493_251	2B	0	A	B	A	A	A	B	B	B	A	A	B	B	A	A	B	A	B	B	B	A	B	B	A	A	A	B	A	A	B	B	A	A	A	A	A	A	A	B	B	A	B	B	B	B	B	A
IWB50555	Kukri_rep_c97239_133	2B	0	A	B	A	A	A	B	B	B	A	A	B	B	A	A	B	A	B	B	B	A	B	B	A	A	A	B	A	A	B	B	A	A	A	A	A	A	A	B	B	A	B	B	B	B	B	A
IWB7661	BS00027693_51	2B	3.65594	A	B	A	A	A	B	B	B	A	A	B	B	A	A	B	A	B	B	B	A	B	B	A	A	A	B	A	A	B	B	A	A	A	A	A	A	A	B	B	A	B	A	B	B	A	A
IWB8365	BS00044332_51	2B	3.65594	A	B	A	A	A	B	B	B	A	A	B	-	A	A	B	A	B	B	B	A	B	B	A	A	A	B	A	A	B	B	A	A	A	A	A	A	A	B	B	A	B	A	B	-	A	A
IWB72374	Tdurum_contig54649_798	2B	5.52237	A	B	A	A	A	B	B	B	A	A	B	B	A	A	B	A	B	B	B	A	B	B	A	A	A	B	A	A	B	B	A	B	A	A	A	A	A	B	B	A	B	A	B	B	A	A
IWA2304	wsnp_Ex_c18354_27181431	2B	5.52237	A	B	A	A	A	B	B	B	A	A	B	B	A	A	B	A	B	B	B	A	B	B	A	A	A	B	A	A	B	B	A	B	A	A	A	A	A	B	B	A	B	A	B	B	A	A
IWA2303	wsnp_Ex_c18354_27181086	2B	5.52237	A	B	A	A	A	B	B	B	A	A	B	B	A	A	B	A	B	B	B	A	B	B	A	A	A	B	A	A	B	B	A	B	A	A	A	A	A	B	B	A	B	A	B	B	A	A
IWB60877	RAC875_c87052_193	2B	7.29607	A	B	A	A	A	B	B	B	A	A	B	B	A	A	B	A	B	B	B	A	B	B	A	A	A	B	A	A	B	B	A	B	A	A	A	A	A	B	B	A	B	A	B	B	A	A
IWB227	BobWhite_c1149_539	2B	7.64089	A	B	A	A	A	B	B	B	A	A	B	B	A	A	B	A	B	B	B	A	B	B	A	A	A	B	A	A	B	B	A	B	A	A	A	A	A	B	B	A	B	A	B	B	A	A
IWB8851	BS00061979_51	2B	7.64089	A	B	A	A	A	B	B	B	A	A	B	B	A	A	B	A	B	B	B	A	B	B	A	A	A	B	A	A	B	B	A	B	A	A	A	A	A	B	B	A	B	A	B	B	A	A
IWB24437	Excalibur_c26388_776	2B	7.64089	A	B	A	A	A	B	B	B	A	A	B	B	A	A	B	A	B	B	B	A	B	B	A	A	A	B	A	A	B	B	A	B	A	A	A	A	A	B	B	A	B	A	B	B	A	A
IWB10434	BS00070050_51	2B	12.1987	A	B	A	A	A	A	A	A	A	A	B	B	A	A	B	A	B	A	B	A	B	B	A	A	A	B	A	A	B	B	A	B	A	A	A	A	A	B	B	A	A	A	B	B	A	A
Tsc2	Tsc2	2B	12.1987	A	B	A	A	A	A	A	A	A	A	B	B	A	A	B	A	B	A	B	A	B	B	A	A	A	B	A	A	B	B	A	B	A	A	A	A	A	B	B	A	A	A	B	B	A	A
IWB6204	BS00010318_51	2B	12.9029	A	A	A	A	A	A	A	A	A	A	B	B	A	A	B	A	B	A	B	A	B	B	A	A	A	B	A	A	B	B	A	B	A	A	A	A	A	B	B	A	A	A	B	B	A	A
IWB10512	BS00070900_51	2B	12.9029	A	A	A	A	A	A	A	A	A	A	B	B	A	A	B	A	B	A	B	A	B	B	A	A	A	B	A	A	B	B	A	B	A	A	A	A	A	B	B	A	A	A	B	B	A	A
IWB9352	BS00064706_51	2B	12.9029	A	A	A	A	A	A	A	A	A	A	B	B	A	A	B	A	B	A	B	A	B	B	A	A	A	B	A	A	B	B	A	B	A	A	A	A	A	B	B	A	A	A	B	B	A	A
IWA2407	wsnp_Ex_c19371_28311667	2B	13.2477	A	A	A	A	A	A	A	A	A	A	B	A	A	A	B	A	B	A	B	A	B	B	A	A	A	B	A	A	B	B	A	B	A	A	A	A	A	B	B	A	A	A	B	B	A	A
IWB8132	BS00038498_51	2B	13.2477	A	A	A	A	A	A	A	A	A	A	B	A	A	A	B	A	B	A	B	A	B	B	A	A	A	B	A	A	B	B	A	B	A	A	A	A	A	B	B	A	A	A	B	B	A	A
IWB69830	Tdurum_contig29563_197	2B	21.9402	A	A	A	A	A	A	A	A	A	A	B	A	A	B	B	A	B	A	B	A	A	A	A	A	A	B	A	A	B	A	A	A	A	A	A	A	A	A	A	A	A	A	A	A	A	A
IWB69976	Tdurum_contig30210_226	2B	22.6347	A	A	A	A	A	A	A	A	A	A	B	A	A	B	B	A	B	A	B	A	A	A	A	A	A	B	A	A	B	A	A	A	A	A	A	A	A	A	A	A	A	A	A	A	B	A
IWB69894	Tdurum_contig29819_61	2B	24.8257	A	A	A	A	A	B	A	A	A	A	B	A	A	B	B	A	B	A	B	A	-	A	A	A	A	B	A	A	A	A	A	A	A	A	A	A	A	A	A	A	A	A	A	A	B	A
IWB65439	TA001688-0396-w	2B	24.8257	A	A	A	A	A	B	A	A	A	A	B	A	A	B	B	A	B	A	B	A	-	A	A	A	A	B	A	A	A	A	A	A	A	A	A	A	A	A	A	A	A	A	A	A	B	A
IWA413	wsnp_BF146221B_Ta_2_2	2B	39.002	-	B	A	A	A	A	A	A	A	B	B	B	B	B	B	A	B	A	B	A	B	B	A	A	A	A	A	A	B	A	A	A	B	A	A	A	A	A	A	A	B	A	B	A	B	B
IWB72205	Tdurum_contig51706_1758	2B	41.5968	A	B	A	A	A	A	A	A	A	B	B	B	B	B	B	A	A	A	B	A	B	B	B	B	A	A	A	A	B	A	B	A	B	A	A	A	A	A	A	A	B	A	B	A	B	B
IWB72204	Tdurum_contig51706_157	2B	41.5968	A	B	A	A	A	A	A	A	A	B	B	B	B	B	B	A	A	A	B	A	B	B	B	B	A	A	A	A	B	A	B	A	B	A	A	A	A	A	A	A	B	A	B	A	B	B
IWB56962	RAC875_c34516_70	2B	41.5968	A	B	A	A	A	A	A	A	A	B	B	B	B	B	B	A	A	A	B	A	B	B	B	B	A	A	A	A	B	A	B	A	B	A	A	A	A	A	A	A	B	A	B	A	B	B
IWB27894	Excalibur_c5958_1398	2B	41.5968	A	B	A	A	A	A	A	A	A	B	B	B	B	B	B	A	A	A	B	A	B	B	B	B	A	A	A	A	B	A	B	A	B	A	A	A	A	A	A	A	B	A	B	A	B	B
IWB69396	Tdurum_contig27976_414	2B	41.944	A	B	A	A	A	A	A	A	A	-	B	B	B	B	B	A	A	A	B	A	B	B	B	B	A	A	A	A	A	A	B	A	B	A	A	A	A	A	A	A	B	A	B	A	B	B
IWB73973	Tdurum_contig9716_2337	2B	41.944	A	B	A	A	A	A	A	A	A	B	B	B	B	B	B	A	A	A	B	A	B	B	B	B	A	A	A	A	A	A	B	A	B	A	A	A	A	A	A	A	B	A	B	A	B	B
IWB49277	Kukri_rep_c107572_121	2B	41.944	A	B	A	A	A	A	A	A	A	B	B	B	B	B	B	A	A	A	B	A	B	B	B	B	A	A	A	A	A	A	B	A	B	A	A	A	A	A	A	A	B	A	B	A	B	B
IWB72086	Tdurum_contig5056_173	2B	41.944	A	B	A	A	A	A	A	A	A	-	B	B	B	B	B	A	A	A	B	A	B	B	B	B	A	A	A	A	A	A	B	A	B	A	A	A	A	A	A	A	B	A	B	A	B	B
IWA6893	wsnp_Ku_c31_62657	2B	42.6385	A	B	A	A	A	A	A	A	A	B	B	B	B	B	B	A	A	A	B	A	B	B	B	B	A	A	A	A	A	A	B	A	B	A	A	A	A	A	A	A	B	A	B	A	B	B
IWB60830	RAC875_c86069_517	2B	48.3885	A	B	A	A	A	B	B	B	A	B	A	B	B	B	B	A	A	A	B	B	B	B	B	B	A	B	B	A	A	A	B	A	B	A	A	A	A	A	A	A	B	A	B	A	B	B
IWB7346	BS00022966_51	2B	48.3885	A	B	A	A	A	B	B	B	A	B	A	B	B	B	B	A	A	A	B	B	B	B	B	B	A	B	B	A	A	A	B	A	B	A	A	A	A	A	A	A	B	A	B	A	B	B
IWB36124	IACX6223	2B	48.3885	A	B	A	A	A	B	B	B	A	B	A	B	B	B	B	A	A	A	B	B	B	B	B	B	A	B	B	A	A	A	B	A	B	A	A	A	A	A	A	A	B	A	B	A	B	B
IWB72760	Tdurum_contig60978_352	2B	48.3885	A	B	A	A	A	B	B	B	A	B	A	B	B	B	B	A	A	A	B	B	B	B	B	B	A	B	B	A	A	A	B	A	B	A	A	A	A	A	A	A	B	A	B	A	B	B
IWB13691	CAP7_c1018_75	2B	49.0878	A	B	A	A	A	B	B	B	A	B	A	B	B	B	B	A	A	A	B	B	B	B	B	B	A	B	B	B	A	A	B	A	B	A	A	A	A	A	A	A	B	A	B	A	B	B
IWA5818	wsnp_JD_c12687_12877994	2B	49.0878	A	B	A	A	A	B	B	B	A	B	A	B	B	B	B	A	A	A	B	B	B	B	B	B	A	B	B	B	A	A	B	A	B	A	A	A	A	A	A	A	B	A	B	A	B	B
IWB73437	Tdurum_contig7800_228	2B	49.4375	A	B	A	A	A	B	B	B	A	B	A	B	B	B	B	A	A	A	B	B	B	B	B	B	A	B	B	B	A	A	B	A	B	A	A	A	A	A	A	A	B	A	B	A	B	B
IWB47380	Kukri_c67276_76	2B	49.7847	A	B	A	A	A	B	B	B	A	B	A	B	B	B	B	A	A	A	B	B	B	B	B	B	A	B	B	B	A	A	B	A	B	A	A	A	A	A	A	A	B	A	B	A	B	B
IWB10430	BS00070001_51	2B	50.8411	A	B	A	A	A	B	B	B	A	B	A	B	B	B	B	A	A	A	B	B	B	B	B	B	A	B	A	B	A	A	B	A	B	A	A	A	A	A	A	A	B	A	B	A	B	B
IWB11568	BS00088575_51	2B	53.398	A	B	A	A	A	B	B	B	A	B	A	B	B	B	B	A	A	A	B	B	B	B	B	B	A	B	A	B	A	A	B	A	B	A	A	A	A	A	A	A	B	A	B	B	B	B
IWB60585	RAC875_c79857_301	2B	53.398	A	B	A	A	A	B	B	B	A	B	A	B	B	B	B	A	A	A	B	B	B	B	B	B	A	B	A	B	A	A	B	A	B	A	A	A	A	A	A	A	B	A	B	B	B	B
IWB12056	BS00099097_51	2B	53.398	A	B	A	A	A	B	B	B	A	B	A	B	B	B	B	A	A	A	B	B	B	B	B	B	A	B	A	B	A	A	B	A	B	A	A	A	A	A	A	A	B	A	B	B	B	B
IWB7069	BS00022417_51	2B	53.7381	A	B	A	A	A	B	B	B	A	B	A	B	B	B	B	A	A	A	A	B	B	B	B	B	A	B	A	B	A	A	B	A	B	A	A	A	A	A	A	A	B	A	B	B	B	B
IWB37206	JD_c2280_91	2B	53.7381	A	B	A	A	A	B	B	B	A	B	A	B	B	B	B	A	A	A	A	B	B	B	B	B	A	B	A	B	A	A	B	A	B	A	A	A	A	A	A	A	B	A	B	B	B	B
IWA1010	wsnp_CAP12_rep_c4678_2134259	2B	53.7381	A	B	A	A	A	B	B	B	A	B	A	B	B	B	B	A	A	A	A	B	B	B	B	B	A	B	A	B	A	A	B	A	B	A	A	A	A	A	A	A	B	A	B	B	B	B
IWB57431	RAC875_c38625_105	2B	53.7381	A	B	A	A	A	B	B	B	A	B	A	B	B	B	B	A	A	A	A	B	B	B	B	B	A	B	A	B	A	A	B	A	B	A	A	A	A	A	A	A	B	A	B	B	B	B
IWB63570	RFL_Contig1139_817	2B	53.7381	A	B	A	A	A	B	B	B	A	B	A	B	B	B	B	A	A	A	A	B	B	B	B	B	A	B	A	B	A	A	B	A	B	A	A	A	A	A	A	A	B	A	B	B	B	B
IWB34871	IAAV4434	2B	53.7381	A	B	A	A	A	B	B	B	A	B	A	B	B	B	B	A	A	A	A	B	B	B	B	B	A	B	A	B	A	A	B	A	B	A	A	A	A	A	A	A	B	A	B	B	B	B
IWB73197	Tdurum_contig71387_65	2B	53.7381	A	B	A	A	A	B	B	B	A	B	A	B	B	B	B	A	A	A	A	B	B	B	B	B	A	B	A	B	A	A	B	A	B	A	A	A	A	A	A	A	B	A	B	B	B	B
IWB68715	Tdurum_contig18197_86	2B	53.7381	A	B	A	A	A	B	B	B	A	B	A	B	B	B	B	A	A	A	A	B	B	B	B	B	A	B	A	B	A	A	B	A	B	A	A	A	A	A	A	A	B	A	B	B	B	B
IWB11527	BS00087793_51	2B	53.7381	A	B	A	A	A	B	B	B	A	B	A	B	B	B	B	A	A	A	A	B	B	B	B	B	A	B	A	B	A	A	B	A	B	A	A	A	A	A	A	A	B	A	B	B	B	B
IWA6509	wsnp_Ku_c13905_22034406	2B	53.7381	A	B	A	A	A	B	B	B	A	B	A	B	B	B	B	A	A	A	A	B	B	B	B	B	A	B	A	B	A	A	B	A	B	A	A	A	A	A	A	A	B	A	B	B	B	B
IWB17890	D_GA8KES402HPK9H_258	2B	53.7381	A	B	A	A	A	B	B	B	A	B	A	B	B	B	B	A	A	A	A	B	B	B	B	B	A	B	A	B	A	A	B	A	B	A	A	A	A	A	A	A	B	A	B	B	B	B
IWB8214	BS00040251_51	2B	54.0805	A	B	A	A	A	B	B	B	A	B	A	B	B	B	B	A	A	A	A	B	B	B	B	B	A	B	A	B	A	A	B	B	B	A	A	A	A	A	A	A	B	A	B	B	B	B
IWB73367	Tdurum_contig76426_861	2B	54.0805	A	B	A	A	A	B	B	B	A	B	A	B	B	B	B	A	A	A	A	B	B	B	B	B	A	B	A	B	A	A	B	B	B	A	A	A	A	A	A	A	B	A	B	B	B	B
IWB32260	GENE-1147_486	2B	54.4277	A	B	A	A	A	B	B	B	A	B	A	B	B	B	B	A	A	A	A	B	B	B	B	B	A	B	A	B	A	A	B	B	B	A	A	A	A	A	A	A	B	A	B	B	B	B
IWB46352	Kukri_c53629_239	2B	61.1074	A	B	A	A	A	B	A	A	A	B	A	B	B	B	B	A	A	A	A	B	A	B	B	B	B	B	A	B	A	A	B	A	B	A	A	A	B	A	A	A	B	A	B	B	B	B
IWB34490	IAAV2018	2B	61.1074	A	B	A	A	A	B	A	A	A	B	A	B	B	B	B	A	A	A	A	B	A	B	B	B	B	B	A	B	A	A	B	A	B	A	A	A	B	A	A	A	B	A	B	B	B	B
IWA2151	wsnp_Ex_c16582_25102216	2B	62.1492	A	B	A	A	A	B	A	A	A	B	A	B	B	B	B	A	A	A	A	B	A	B	B	B	B	B	A	B	A	A	B	A	B	A	A	A	B	A	A	A	B	A	B	B	B	B
IWB34350	IAAV1296	2B	65.9441	A	B	A	A	A	B	A	A	A	B	A	B	A	B	B	A	A	A	A	B	A	B	B	B	B	B	A	B	A	A	B	A	B	A	A	A	B	B	A	A	A	A	B	B	-	B
IWA439	wsnp_BF291736B_Ta_1_1	2B	66.2987	A	B	B	A	A	B	A	A	A	B	A	B	A	B	B	A	A	A	A	B	A	B	B	B	B	B	A	B	A	A	B	A	B	A	A	A	B	B	A	A	A	A	B	B	-	B
IWB36818	Jagger_c9472_305	2B	66.6459	A	B	B	A	A	B	A	A	A	B	A	B	A	B	B	A	A	A	A	B	A	B	B	B	B	B	A	B	A	A	B	A	B	B	A	A	B	B	A	A	A	A	B	B	-	B
IWB64964	RFL_Contig5290_1493	2B	67.3452	A	B	B	A	A	B	A	A	A	B	A	B	A	B	B	A	A	A	A	B	A	B	B	B	B	B	A	B	A	A	B	A	B	B	A	A	B	B	A	A	A	A	B	B	-	B
IWA169	wsnp_BE445278B_Ta_2_1	2B	67.3452	A	B	B	A	A	B	A	A	A	B	A	B	A	B	B	A	A	A	A	B	A	B	B	B	B	B	A	B	A	A	B	A	B	B	A	A	B	B	A	A	A	A	B	B	-	B
IWB9584	BS00065558_51	2B	67.3452	A	B	B	A	A	B	A	A	A	-	A	B	A	B	B	A	A	A	A	B	A	B	B	B	B	B	A	B	A	A	B	A	B	B	A	A	B	B	A	A	A	A	B	B	A	B
IWB10611	BS00072379_51	2B	71.0555	A	B	B	A	A	B	B	B	A	B	A	B	A	B	B	A	A	A	A	B	A	B	B	B	B	B	A	B	A	A	B	A	B	B	A	A	A	A	A	A	A	A	B	B	-	B
IWB65533	TA002306-1975	2B	71.0555	A	B	B	A	A	B	B	B	A	B	A	B	A	B	B	A	A	A	A	B	A	B	-	B	B	B	A	B	A	A	B	A	B	B	A	A	A	A	A	A	A	A	B	B	-	B
IWB43921	Kukri_c3096_1411	2B	71.0555	A	B	B	A	A	B	B	B	A	B	A	B	A	B	B	A	A	A	A	B	A	B	B	B	B	B	A	B	A	A	B	A	B	B	A	A	A	A	A	A	A	A	B	B	-	B
IWB10875	BS00076369_51	2B	71.0555	A	B	B	A	A	B	B	B	A	B	A	B	A	B	B	A	A	A	A	B	A	B	B	B	B	-	A	B	A	A	B	A	B	B	A	A	A	A	A	A	A	A	B	B	-	B
IWB8863	BS00062485_51	2B	71.0555	A	B	B	A	A	B	B	B	A	B	A	B	A	B	B	A	A	A	A	B	A	B	B	B	B	-	A	B	A	A	B	A	B	B	A	A	A	A	A	A	A	A	B	B	-	B
IWA4751	wsnp_Ex_c7947_13490279	2B	71.0555	A	B	B	A	A	B	B	B	A	B	A	B	A	B	B	A	A	A	A	B	A	B	B	B	B	-	A	B	A	A	B	A	B	B	A	A	A	A	A	A	A	A	B	B	-	B
IWA4752	wsnp_Ex_c7947_13490335	2B	71.0555	A	B	B	A	A	B	B	B	A	B	A	B	A	B	B	A	A	A	A	B	A	B	B	B	B	-	A	B	A	A	B	A	B	B	A	A	A	A	A	A	A	A	B	B	A	B
IWA3258	wsnp_Ex_c30037_39004913	2B	71.0555	A	B	B	A	A	B	B	B	A	B	A	B	A	B	B	A	A	A	A	B	A	B	B	B	B	-	A	B	A	A	B	A	B	B	A	A	A	A	A	A	A	A	B	B	-	B
IWB27089	Excalibur_c4984_162	2B	71.0555	A	B	B	A	A	B	B	B	A	B	A	B	A	B	B	A	A	A	A	B	A	B	B	B	B	-	A	B	A	A	B	A	B	B	A	A	A	A	A	A	A	A	B	B	-	B
IWA207	wsnp_BE488220B_Ta_1_1	2B	71.0555	A	B	B	A	A	B	B	B	A	B	A	B	A	B	B	A	A	A	A	B	A	B	B	B	B	-	A	B	A	A	B	A	B	B	A	A	A	A	A	A	A	A	B	B	A	B
IWA2025	wsnp_Ex_c1541_2943791	2B	71.0555	A	B	B	A	A	B	B	B	A	B	A	B	A	B	B	A	A	A	A	B	A	B	B	B	B	-	A	B	A	A	B	A	B	B	A	A	A	A	A	A	A	A	B	B	A	B
IWA3045	wsnp_Ex_c26375_35620271	2B	71.0555	A	B	B	A	A	B	B	B	A	B	A	B	A	B	B	A	A	A	A	B	A	B	B	B	B	-	A	B	A	A	B	A	B	B	A	A	A	A	A	A	A	A	B	B	-	B
IWB74647	tplb0038f13_1219	2B	71.0555	A	B	B	A	A	B	B	B	A	B	A	B	A	B	B	A	A	A	A	B	A	B	B	B	B	-	A	B	A	A	B	A	B	B	A	A	A	A	A	A	A	A	B	B	-	B
IWB45726	Kukri_c47082_109	2B	72.1348	A	B	B	A	A	B	B	B	A	B	A	B	A	B	B	A	A	A	A	B	A	B	B	B	B	-	A	A	A	A	B	A	B	B	A	A	A	A	A	A	A	A	B	B	A	B
IWB34687	IAAV3255	2B	72.1348	A	B	B	A	A	B	B	B	A	B	A	B	A	B	B	A	A	A	A	B	A	B	B	B	B	-	A	A	A	A	B	A	B	B	A	A	A	A	A	A	A	A	B	B	-	B
IWA3153	wsnp_Ex_c28243_37383894	2B	72.1348	A	B	B	A	A	B	B	B	A	B	A	B	A	B	B	A	A	A	A	B	A	B	B	B	B	-	A	A	A	A	B	A	B	B	A	A	A	A	A	A	A	A	B	B	A	B
IWA6215	wsnp_JD_c9251_10121113	2B	72.1348	A	B	B	A	A	B	B	B	A	B	A	B	A	B	B	A	A	A	A	B	A	B	B	B	B	-	A	A	A	A	B	A	B	B	A	A	A	A	A	A	A	A	B	B	-	B
IWA697	wsnp_CAP11_c1956_1045077	2B	72.1348	A	B	B	A	A	B	B	B	A	B	A	B	A	B	B	A	A	A	A	B	A	B	B	B	B	-	A	A	A	A	B	A	B	B	A	A	A	A	A	A	A	A	B	B	-	B
IWA5117	wsnp_Ex_rep_c104478_89183627	2B	72.1348	A	B	B	A	A	B	B	B	A	B	A	B	A	B	B	A	A	A	A	B	A	B	B	B	B	-	A	A	A	A	B	A	B	B	A	A	A	A	A	A	A	A	B	B	-	B
IWB42378	Kukri_c20819_497	2B	75.101	A	B	B	A	A	B	B	B	A	B	A	B	A	B	B	A	A	A	A	B	A	B	A	A	B	A	A	A	A	A	B	A	B	B	A	A	A	B	A	A	B	A	B	B	-	B
IWA2972	wsnp_Ex_c25438_34703568	2B	75.101	A	B	B	A	A	B	B	B	A	B	A	B	A	B	B	A	A	A	A	B	A	B	A	A	B	A	A	A	A	A	B	A	B	B	A	A	A	B	A	A	B	A	B	B	-	B
IWA587	wsnp_BG608232B_Ta_2_2	2B	75.101	A	B	B	A	A	B	B	B	A	B	A	B	A	B	B	A	A	A	A	B	A	B	A	A	B	A	A	A	A	A	B	A	B	B	A	A	A	B	A	A	B	A	B	B	-	B
IWA586	wsnp_BG608232B_Ta_2_1	2B	75.101	A	B	B	A	A	B	B	B	A	B	A	B	A	B	B	A	A	A	A	B	A	B	A	A	B	A	A	A	A	A	B	A	B	B	A	A	A	B	A	A	B	A	B	B	-	B
IWB29666	Excalibur_c99477_90	2B	75.101	A	B	B	A	A	B	B	B	A	B	A	B	A	B	B	A	A	A	A	B	A	B	A	A	B	A	A	A	A	A	B	A	B	B	A	A	A	B	A	A	B	A	B	B	-	B
IWB42581	Kukri_c22002_793	2B	75.101	A	B	B	A	A	B	B	B	A	B	A	B	A	B	B	A	A	A	A	B	A	B	A	A	B	A	A	A	A	A	B	A	B	B	A	A	A	B	A	A	B	A	B	B	-	B
IWB2143	BobWhite_c27816_523	2B	75.101	A	B	B	A	A	B	B	B	A	B	A	B	A	B	B	A	A	A	A	B	A	B	A	A	B	A	A	A	A	A	B	A	B	B	A	A	A	B	A	A	B	A	B	B	A	B
IWA326	wsnp_be499362B_Td_2_1	2B	75.101	A	B	B	A	A	B	B	B	A	B	A	B	A	B	B	A	A	A	A	B	A	B	A	A	B	A	A	A	A	A	B	A	B	B	A	A	A	B	A	A	B	A	B	B	-	B
IWB1518	BobWhite_c21705_196	2B	77.1345	A	B	B	A	A	-	B	B	A	-	A	B	A	B	B	A	A	A	A	B	A	B	A	A	B	A	A	A	A	A	B	A	B	B	A	A	B	B	A	A	B	A	B	B	-	B
IWB69363	Tdurum_contig27880_75	2B	80.4177	A	B	B	A	A	-	B	B	B	B	A	B	B	B	B	A	A	A	A	B	A	B	A	A	B	A	A	A	B	A	B	A	B	B	A	A	A	B	A	A	B	A	B	B	-	B
IWB56441	RAC875_c30185_376	2B	80.4177	A	B	B	A	A	B	B	B	B	B	A	B	B	B	B	A	A	A	A	B	A	B	A	A	B	A	A	A	B	A	B	A	B	B	A	A	A	B	A	A	B	A	B	B	-	B
IWA2955	wsnp_Ex_c25217_34481787	2B	80.4177	A	B	B	A	A	B	B	B	B	B	A	B	B	B	B	A	A	A	A	B	A	B	A	A	B	A	A	A	B	A	B	A	B	B	A	A	A	B	A	A	B	A	B	B	-	B
IWB36708	Jagger_c6853_60	2B	80.4177	A	B	B	A	A	B	B	B	B	B	A	B	B	B	B	A	A	A	A	B	A	B	A	A	B	A	A	A	B	A	B	A	B	B	A	A	A	B	A	A	B	A	B	B	B	B
IWB36256	IACX790	2B	81.8466	A	B	B	A	A	B	B	B	B	B	A	B	B	B	B	A	B	A	A	A	A	B	A	A	B	B	A	A	B	A	B	A	B	B	A	A	A	B	A	A	B	A	B	B	B	B
IWA2512	wsnp_Ex_c20169_29215401	2B	81.8466	A	B	B	A	A	B	B	B	B	B	A	B	B	B	B	A	B	A	A	A	A	B	A	A	B	B	A	A	B	A	B	A	B	B	A	A	A	B	A	A	B	A	B	B	B	B
IWA243	wsnp_BE490763B_Ta_2_2	2B	82.5508	A	B	B	A	A	B	B	B	B	-	A	A	B	B	B	A	A	A	A	A	A	B	A	A	B	B	A	A	B	A	B	A	B	B	A	A	A	B	A	A	B	A	B	B	B	B
IWB35658	IACX11084	2B	82.5508	A	B	B	A	A	B	B	B	B	B	A	A	B	B	B	A	A	A	A	A	A	B	A	A	B	B	A	A	B	A	B	A	B	B	A	A	A	B	A	A	B	A	B	B	B	B
IWB9286	BS00064448_51	2B	82.8981	A	B	B	A	A	B	B	B	B	A	A	A	B	B	B	A	A	A	A	A	A	B	A	A	B	B	A	A	B	A	B	A	B	B	A	A	A	B	A	A	B	A	B	B	B	B
IWB35303	IAAV717	2B	82.8981	A	B	B	A	A	B	B	B	B	A	A	A	B	B	B	A	A	A	A	A	A	B	A	A	B	B	A	A	B	A	B	A	B	B	A	A	A	B	A	A	B	A	B	B	B	B
IWB6667	BS00019285_51	2B	82.8981	A	B	B	A	A	B	B	B	B	A	A	A	B	B	B	A	A	A	A	A	A	B	A	A	B	B	A	A	B	A	B	A	B	B	A	A	A	B	A	A	B	A	B	B	B	B
IWB53902	RAC875_c14316_584	2B	83.9851	A	B	B	A	A	B	B	B	B	A	A	A	B	B	B	A	A	A	A	A	A	B	A	A	B	B	A	A	B	A	B	A	B	B	A	A	A	-	A	A	B	A	B	B	B	B
IWB23356	Excalibur_c19649_1500	2B	83.9851	A	B	B	A	A	B	B	B	B	A	A	A	B	B	B	A	A	A	A	A	A	B	A	A	B	B	A	A	B	A	B	A	B	B	A	A	A	-	A	A	B	A	B	B	B	B
IWB21140	Ex_c68194_1994	2B	83.9851	A	B	B	A	A	B	B	B	B	A	A	A	B	B	B	A	A	A	A	A	A	B	A	A	B	B	A	A	B	A	B	A	B	B	A	A	A	-	A	A	B	A	B	B	B	B
IWB27166	Excalibur_c5064_765	2B	83.9851	A	B	B	A	A	B	B	B	B	A	A	A	B	B	B	A	A	A	A	A	A	B	A	A	B	B	A	A	B	A	B	A	B	B	A	A	A	-	A	A	B	A	B	B	B	B
IWB59086	RAC875_c54947_108	2B	83.9851	A	B	B	A	A	B	B	B	B	A	A	A	B	B	B	A	A	A	A	A	A	B	A	A	B	B	A	A	B	A	B	A	B	B	A	A	A	-	A	A	B	A	B	B	B	B
IWB37941	JG_c2092_196	2B	83.9851	A	B	B	A	A	B	B	B	B	A	A	A	B	B	B	A	A	A	A	A	A	B	A	A	B	B	A	A	B	A	B	A	B	B	A	A	A	-	A	A	B	A	B	B	B	B
IWB73040	Tdurum_contig66317_77	2B	83.9851	A	B	B	A	A	B	B	B	B	A	A	A	B	B	B	A	A	A	A	A	A	B	A	A	B	B	A	A	B	A	B	A	B	B	A	A	A	-	A	A	B	A	B	B	B	B
IWB7263	BS00022800_51	2B	84.3348	A	B	B	A	A	B	B	B	B	A	A	A	B	B	B	A	A	A	A	A	A	B	A	A	B	B	A	A	B	A	B	A	B	B	A	A	A	B	A	A	B	A	B	B	B	B
IWB11848	BS00093992_51	2B	84.3348	A	B	B	A	A	B	B	B	B	A	A	A	B	B	B	A	A	A	A	A	A	B	A	A	B	B	A	A	B	A	B	A	B	B	A	A	A	B	A	A	B	A	B	B	B	B
IWB12242	BS00105409_51	2B	87.6729	A	B	B	A	A	B	B	B	B	B	A	A	B	B	B	A	A	A	A	A	A	B	A	A	B	B	A	A	B	A	B	A	B	B	A	A	A	B	A	A	B	A	B	B	B	B
IWB35393	IAAV7841	2B	87.6729	A	B	B	A	A	B	B	B	B	B	A	A	B	B	B	A	A	A	A	A	A	B	A	A	B	B	A	A	B	A	B	A	B	B	A	A	A	B	A	A	B	A	B	B	B	B
IWB1661	BobWhite_c23046_293	2B	87.6729	A	B	B	A	A	B	B	B	B	B	A	A	B	B	B	A	A	A	A	A	A	B	A	A	B	B	A	A	B	A	B	A	B	B	A	A	A	B	A	A	B	A	B	B	B	B
IWB45932	Kukri_c49007_501	2B	87.6729	A	B	B	A	A	B	B	B	B	B	A	A	B	B	B	A	A	A	A	A	A	B	A	A	B	B	A	A	B	A	B	A	B	B	A	A	A	B	A	A	B	A	B	B	B	B
IWB72474	Tdurum_contig55801_1012	2B	89.0816	A	B	B	A	A	B	B	B	B	A	A	A	B	B	B	A	A	A	A	A	A	B	A	A	B	B	A	A	B	A	B	A	B	B	A	A	A	B	A	A	B	A	B	B	B	B
IWB72542	Tdurum_contig5691_596	2B	89.0816	A	B	B	A	A	B	B	B	B	A	A	A	B	B	B	A	A	A	A	A	A	B	A	A	B	B	A	A	B	A	B	A	B	B	A	A	A	B	A	A	B	A	B	B	B	B
IWB8768	BS00059115_51	2B	89.7809	A	B	B	A	A	B	B	B	B	A	A	A	B	B	B	A	A	A	A	A	A	B	A	A	B	B	A	A	B	A	B	A	B	B	A	A	A	B	A	A	B	A	B	B	B	B
IWB73172	Tdurum_contig70510_462	2B	89.7809	A	B	B	A	A	B	B	B	B	A	A	A	B	B	B	A	A	A	A	A	A	B	A	A	B	B	A	A	B	A	B	A	B	B	A	A	A	B	A	A	B	A	B	B	B	B
IWB102	BobWhite_c1072_100	2B	90.1257	A	B	B	A	A	B	B	B	B	A	A	A	B	B	B	A	A	A	A	-	A	B	A	A	B	B	A	A	B	A	B	A	B	B	A	A	A	B	A	A	B	A	B	B	B	B
IWB49323	Kukri_rep_c108243_143	2B	90.1257	A	B	B	A	A	B	B	B	B	A	A	A	B	B	B	A	A	A	A	-	A	B	A	A	B	B	A	A	B	A	B	A	B	B	A	A	A	B	A	A	B	A	B	B	B	B
IWB72468	Tdurum_contig55699_246	2B	90.1257	A	B	B	A	A	B	B	B	B	A	A	A	B	B	B	A	A	A	A	-	A	B	A	A	B	B	A	A	B	A	B	A	B	B	A	A	A	B	A	A	B	A	B	B	B	B
IWB7433	BS00023124_51	2B	90.1257	A	B	B	A	A	B	B	B	B	A	A	A	B	B	B	A	A	A	A	-	A	B	A	A	B	B	A	A	B	A	B	A	B	B	A	A	A	B	A	A	B	A	B	B	B	B
IWB9247	BS00064318_51	2B	90.1257	A	B	B	A	A	B	B	B	B	A	A	-	B	B	B	A	A	A	A	-	A	B	A	A	B	B	A	A	B	A	B	A	B	B	A	A	A	B	A	A	B	A	B	B	B	B
IWB6150	BS00010012_51	2B	90.1257	A	B	B	A	A	B	B	B	B	A	A	A	B	B	B	A	A	A	A	-	A	B	A	A	B	B	A	A	B	A	B	A	B	B	A	A	A	B	A	A	B	A	B	B	B	B
IWB8007	BS00035276_51	2B	90.1257	A	B	B	A	A	B	B	B	B	A	A	A	B	B	B	A	A	A	A	-	A	B	A	A	B	B	A	A	B	A	B	A	B	B	A	A	A	B	A	A	B	A	B	B	B	B
IWB30560	Excalibur_rep_c111801_55	2B	90.8251	A	B	B	A	A	B	B	B	B	A	A	A	B	B	B	A	A	A	A	-	A	B	A	A	B	B	A	A	B	A	B	A	B	B	A	A	A	B	A	A	B	A	B	B	B	B
IWB36126	IACX6231	2B	91.1699	A	B	B	A	A	B	B	B	B	A	A	A	B	B	B	A	A	A	A	A	A	B	A	A	B	B	A	A	B	A	B	A	B	B	A	A	A	B	A	A	B	B	B	B	B	B
IWB54520	RAC875_c17658_1419	2B	91.1699	A	B	B	A	A	B	B	B	B	A	A	A	B	B	B	A	A	A	A	-	A	B	A	A	B	B	A	A	B	A	B	A	B	B	A	A	A	B	A	A	B	B	B	B	B	B
IWB73960	Tdurum_contig96648_102	2B	91.1699	A	B	B	A	A	B	B	B	B	A	A	A	B	B	B	A	A	A	A	-	A	B	A	A	B	B	A	A	B	A	B	A	B	B	A	A	A	B	A	A	B	B	B	B	B	B
IWA5051	wsnp_Ex_rep_c102127_87360034	2B	94.8802	A	B	B	A	A	B	B	B	B	A	A	A	B	B	B	A	A	A	B	-	A	B	A	A	B	B	A	A	B	A	B	A	B	B	A	A	A	A	A	A	B	B	B	B	B	B
IWB24602	Excalibur_c27629_473	2B	94.8802	A	B	B	A	A	B	B	B	B	A	A	A	B	B	B	A	A	A	B	-	A	B	A	A	B	B	A	A	B	A	B	A	B	B	A	A	A	A	A	A	B	B	B	B	B	B
IWB49829	Kukri_rep_c68903_708	2B	101.456	A	B	B	A	A	B	B	B	B	A	A	A	B	B	B	B	A	A	B	-	A	B	B	B	B	B	A	B	B	A	B	A	B	B	A	A	A	A	A	A	B	B	B	B	B	B
IWB73846	Tdurum_contig93103_284	2B	108.189	A	B	B	A	A	B	B	B	B	A	B	A	B	A	A	B	A	A	B	-	A	B	B	B	B	B	A	B	B	A	B	A	B	B	A	A	A	A	A	A	B	B	B	B	B	A
IWB479	BobWhite_c13295_407	2B	109.988	A	B	B	A	A	B	B	B	B	B	B	A	B	A	A	B	A	A	B	-	A	B	B	B	B	B	B	B	B	A	B	A	B	B	A	A	A	A	A	A	B	B	B	B	B	A
IWB23010	Excalibur_c17745_493	2B	110.338	A	B	B	A	A	B	B	B	B	B	B	B	B	A	A	B	A	A	B	B	A	B	B	B	B	B	B	B	B	A	B	A	B	B	A	A	A	A	A	A	B	B	B	B	B	A
IWB55966	RAC875_c26697_589	2B	110.338	A	B	B	A	A	B	B	B	B	B	B	B	B	A	A	B	A	A	B	B	A	B	B	B	B	B	B	B	B	A	B	A	B	B	A	A	A	A	A	A	B	B	B	B	B	A
IWB25868	Excalibur_c37753_655	2B	110.338	A	B	B	A	A	B	B	B	B	B	B	B	B	A	A	B	A	A	B	B	A	B	B	B	B	B	B	B	B	A	B	A	B	B	A	A	A	A	A	A	B	B	B	B	B	A
IWB7050	BS00022374_51	2B	111.737	A	B	B	A	A	B	B	B	B	B	B	B	B	A	A	B	A	A	B	B	A	B	A	A	B	B	B	B	B	A	B	A	B	B	A	A	A	A	A	A	B	B	B	B	B	A
IWB4273	BobWhite_c7050_792	2B	112.077	A	B	B	A	A	B	B	B	B	B	B	B	B	A	A	B	A	A	B	B	A	B	A	A	B	B	B	B	B	A	B	A	B	B	A	A	A	A	A	A	B	B	B	B	B	A
IWB4272	BobWhite_c7050_564	2B	112.077	A	B	B	A	A	B	B	B	B	B	B	B	B	A	A	B	A	A	B	B	A	B	A	A	B	B	B	B	B	A	B	A	B	B	A	A	A	A	A	A	B	B	B	B	B	A
IWB8338	BS00043338_51	2B	112.077	A	B	B	A	A	B	B	B	B	B	B	B	B	A	A	B	A	A	B	B	A	B	A	A	B	B	B	B	B	A	B	A	B	B	A	A	A	A	A	A	B	B	B	B	B	A
IWB57069	RAC875_c35399_497	2B	112.077	A	B	B	A	A	B	B	B	B	B	B	B	B	A	A	B	A	A	B	B	A	B	A	A	B	B	B	B	B	A	B	A	B	B	A	A	A	A	A	A	B	B	B	B	B	A
IWB43633	Kukri_c29052_75	2B	112.077	A	B	B	A	A	B	B	B	B	B	B	B	B	A	A	B	A	A	B	B	A	B	A	A	B	B	B	B	B	A	B	A	B	B	A	A	A	A	A	A	B	B	B	B	B	A
IWB14677	CAP8_c3234_216	2B	112.077	A	B	B	A	A	B	B	B	B	B	B	B	B	A	A	B	A	A	B	B	A	B	A	A	B	B	B	B	B	A	B	A	B	B	A	A	A	A	A	A	B	B	B	B	B	A
IWB10162	BS00067828_51	2B	113.838	A	B	B	A	A	B	B	B	B	B	B	B	B	A	A	B	A	A	B	B	A	B	A	A	B	B	B	B	B	A	B	A	B	A	A	A	B	A	A	A	B	B	B	B	B	A
IWB71976	Tdurum_contig49532_53	2B	116.358	A	B	B	A	A	B	B	B	B	B	B	B	B	A	B	B	A	A	B	B	A	B	A	A	B	B	B	B	B	A	B	A	B	A	A	A	B	A	B	A	B	A	B	B	B	A
IWB52447	Ra_c69149_345	2B	116.358	A	B	B	A	A	B	B	B	B	B	B	B	B	A	B	B	A	A	B	B	A	B	A	A	B	B	B	B	B	A	B	A	B	A	A	A	B	A	B	A	B	A	B	B	B	A
IWB22835	Excalibur_c16679_215	2B	118.878	A	B	B	A	A	B	B	B	B	B	B	B	B	A	B	B	A	A	B	B	A	B	A	A	B	B	B	B	B	A	B	A	B	A	A	A	B	A	B	A	B	B	B	B	B	A
IWB10455	BS00070301_51	2B	118.878	A	B	B	A	A	B	B	B	B	B	B	B	B	A	B	B	A	A	B	B	A	B	A	A	B	B	B	B	B	A	B	A	B	A	A	A	B	A	B	A	B	B	B	B	B	A
IWB21324	Ex_c7795_2122	2B	120.664	A	B	B	A	A	B	B	B	B	B	B	A	B	A	B	B	A	A	B	B	B	B	A	A	B	B	B	B	B	A	B	A	B	A	A	A	B	A	B	A	B	B	B	B	B	A
IWB73759	Tdurum_contig9071_215	2B	128.095	A	B	B	A	B	-	A	A	B	-	B	A	B	A	B	B	A	A	B	A	B	B	A	A	B	B	B	B	B	A	B	B	B	A	A	A	A	B	B	A	B	B	B	B	B	B
IWB8157	BS00039187_51	2B	130.335	A	B	B	A	B	B	A	A	B	B	B	A	B	A	B	B	A	A	B	A	B	A	A	A	B	B	A	B	B	A	B	B	B	A	A	A	A	B	B	A	B	B	B	B	B	B
IWB11295	BS00083329_51	2B	131.044	A	B	B	A	B	A	A	A	B	B	B	A	B	A	B	B	A	A	B	A	B	A	A	A	B	B	A	B	B	A	B	B	B	A	A	A	A	B	B	A	B	B	B	B	B	B
IWB60460	RAC875_c7735_338	2B	131.044	A	B	B	A	B	A	A	A	B	B	B	A	B	A	B	B	A	A	B	A	B	A	A	A	B	B	A	B	B	A	B	B	B	A	A	A	A	B	B	A	B	B	B	B	B	B
IWB7569	BS00025106_51	2B	132.093	A	B	B	A	B	A	A	A	B	B	B	A	B	A	B	B	A	A	B	A	B	A	A	A	A	B	A	B	B	A	B	B	B	A	A	A	A	B	B	A	B	B	B	B	B	B
IWB6010	BS00007384_51	2B	132.093	A	B	B	A	B	A	A	A	B	B	B	A	B	A	B	B	A	A	B	A	B	A	A	A	A	B	A	B	B	A	B	B	B	A	A	A	A	B	B	A	B	B	B	B	B	B
IWB4120	BobWhite_c62684_270	2B	132.093	A	B	B	A	B	A	A	A	B	B	B	A	B	A	B	B	A	A	B	A	B	A	A	A	A	B	A	B	B	A	B	B	B	A	A	A	A	B	B	A	B	B	B	B	B	B
IWA3315	wsnp_Ex_c31064_39902843	2B	133.522	B	B	B	A	B	A	A	A	B	B	B	A	B	A	B	B	A	A	B	A	B	A	A	A	A	B	A	B	B	A	B	B	B	A	A	A	A	B	B	A	B	B	B	B	B	B
IWB11333	BS00083998_51	2B	133.522	B	B	B	A	B	A	A	A	B	B	B	A	B	A	B	B	A	A	B	A	B	A	A	A	A	B	A	B	B	A	B	B	B	A	A	A	A	B	B	A	B	B	B	B	B	B
IWB7605	BS00026032_51	2B	133.877	B	B	B	A	B	A	A	A	B	B	B	A	B	A	B	B	A	A	B	B	B	A	A	A	A	B	A	B	B	A	B	B	B	A	A	A	A	B	B	A	B	B	B	B	B	B
IWB72721	Tdurum_contig60260_89	3A	0	B	B	A	A	A	A	A	A	B	A	A	A	B	B	A	A	B	B	B	A	A	B	A	A	B	B	B	B	A	B	A	A	B	A	A	B	A	A	A	B	B	A	A	A	B	A
IWB74070	Tdurum_contig99640_243	3A	0	B	B	A	A	A	A	A	A	B	A	A	A	B	B	A	A	B	B	B	A	A	B	A	A	B	B	B	B	A	B	A	A	B	A	A	B	A	A	A	B	B	A	A	A	B	A
IWB73771	Tdurum_contig91865_242	3A	0.347211	B	B	A	A	A	A	A	A	B	A	A	A	B	B	A	A	B	B	B	A	A	B	A	A	B	B	B	B	A	B	A	A	B	A	A	B	A	A	A	B	B	A	A	A	B	A
IWB56304	RAC875_c29241_165	3A	0.347211	B	B	A	A	A	-	A	A	B	A	A	A	B	B	A	A	B	B	B	A	A	B	A	A	B	B	B	B	A	B	A	A	B	A	A	B	A	A	A	B	B	A	A	A	B	A
IWB40102	Ku_c8627_745	3A	0.347211	B	B	A	A	A	A	A	A	B	A	A	A	B	B	A	A	B	B	B	A	A	B	A	A	B	B	B	B	A	B	A	A	B	A	A	B	A	A	A	B	B	A	A	A	B	A
IWA1996	wsnp_Ex_c15264_23484855	3A	0.347211	B	B	A	A	A	A	A	A	B	A	A	A	B	B	A	A	B	B	B	-	A	B	A	A	B	B	B	B	A	B	A	A	B	A	A	B	A	A	A	B	B	A	A	A	B	A
IWB67571	Tdurum_contig12371_197	3A	1.40365	B	B	A	A	A	A	A	A	B	A	A	A	B	B	A	A	B	B	B	A	A	B	A	A	B	B	B	B	A	B	A	B	B	A	A	B	A	A	A	B	B	A	A	A	B	A
IWB61907	RAC875_rep_c109701_76	3A	1.40365	B	B	A	A	A	A	A	A	B	A	A	A	B	B	A	A	B	B	B	A	A	B	A	A	B	B	B	B	A	B	A	B	B	A	A	B	A	A	A	B	B	A	A	A	B	A
IWB60047	RAC875_c66845_466	3A	2.10296	B	B	A	A	A	A	A	A	B	A	A	A	B	B	A	A	B	B	B	A	A	B	A	A	B	B	B	B	A	B	A	B	B	B	A	B	A	A	A	B	B	A	A	A	B	A
IWB7895	BS00032524_51	3A	2.44778	B	B	A	A	A	A	A	A	B	A	A	A	B	B	A	A	B	B	B	A	A	B	A	A	B	B	B	B	A	B	A	B	B	B	A	B	A	A	A	B	B	A	A	A	B	A
IWB24102	Excalibur_c24123_165	3A	2.44778	B	B	A	A	A	A	A	A	B	A	A	A	B	B	A	A	B	B	B	A	A	B	A	A	B	B	B	B	A	B	A	B	B	B	A	B	A	A	A	B	B	A	A	A	B	A
IWB9559	BS00065468_51	3A	2.44778	B	B	A	A	A	A	A	A	B	A	A	A	B	B	A	A	B	B	B	A	A	B	A	A	B	B	B	B	A	B	A	B	B	B	A	B	A	A	A	B	B	A	A	A	B	A
IWB6719	BS00021694_51	3A	2.44778	B	B	A	A	A	A	A	A	B	A	A	A	B	B	A	A	B	B	B	A	A	B	A	A	B	B	B	B	A	B	A	B	B	B	A	B	A	A	A	B	B	A	A	A	B	A
IWB11867	BS00094366_51	3A	2.44778	B	B	A	A	A	A	A	A	B	A	A	A	B	B	A	A	B	B	B	A	A	B	A	A	B	B	B	B	A	B	A	B	B	B	A	B	A	A	A	B	B	A	A	A	B	A
IWB50038	Kukri_rep_c70575_722	3A	9.58197	A	B	A	A	A	A	A	A	B	B	A	A	B	B	A	A	B	B	B	A	A	B	A	A	B	B	B	B	A	B	A	B	B	B	B	B	B	A	A	B	B	B	B	A	B	A
IWB9991	BS00067216_51	3A	11.0109	A	B	A	A	A	A	A	A	B	-	A	A	B	B	A	A	B	A	B	A	A	B	A	A	B	B	B	B	A	B	A	B	B	B	B	B	B	A	A	B	B	B	B	A	B	A
IWB9990	BS00067215_51	3A	11.0109	A	B	A	A	A	A	A	A	B	B	A	A	B	B	A	A	B	A	B	A	A	B	A	A	B	B	B	B	A	B	A	B	B	B	B	B	B	A	A	B	B	B	B	A	B	A
IWB71453	Tdurum_contig43850_675	3A	14.7771	A	B	A	A	A	B	B	B	B	B	A	A	B	B	A	B	B	A	B	A	A	B	A	A	B	B	B	B	A	B	A	B	B	A	B	B	B	-	A	B	B	B	B	A	B	A
IWB70107	Tdurum_contig30790_154	3A	15.1244	A	B	A	A	A	B	B	B	B	B	A	A	B	B	A	B	B	A	B	A	A	B	A	A	B	B	B	B	A	B	A	B	B	A	B	B	B	-	A	B	B	B	B	A	B	A
IWB52961	RAC875_c102362_59	3A	18.4874	A	B	A	A	A	B	B	B	B	B	A	A	B	B	A	B	B	A	B	A	A	B	A	A	B	B	B	A	A	B	A	B	B	A	B	B	B	-	A	B	B	A	B	A	B	A
IWB57771	RAC875_c41729_1539	3A	18.4874	A	B	A	A	A	B	B	B	B	B	A	A	B	B	A	B	B	A	B	A	A	B	A	A	B	B	B	A	A	B	A	B	B	A	B	B	B	-	A	B	B	A	B	A	B	A
IWB72436	Tdurum_contig55335_316	3A	18.4874	A	B	A	A	A	B	B	B	B	B	A	A	B	B	A	B	B	A	B	A	A	B	A	A	B	B	B	A	A	B	A	B	B	A	B	B	B	-	A	B	B	A	B	A	B	A
IWB39272	Ku_c3602_226	3A	20.7276	A	B	B	A	A	B	B	B	B	-	A	A	B	B	A	B	B	A	B	A	A	B	A	A	B	B	B	A	A	B	A	B	B	B	B	B	B	-	A	B	B	A	B	A	B	A
IWA5006	wsnp_Ex_rep_c101340_86719239	3A	22.9512	A	B	B	A	A	B	B	B	B	B	A	A	B	B	A	B	B	A	A	A	A	B	A	A	B	B	B	A	B	A	A	B	B	B	B	B	B	-	A	B	B	A	B	A	B	A
IWB71668	Tdurum_contig46252_1395	3A	22.9512	A	B	B	A	A	B	B	B	B	B	A	A	B	B	A	B	B	A	A	A	A	B	A	A	B	B	B	A	B	A	A	B	B	B	B	B	B	-	A	B	B	A	B	A	B	A
IWB34943	IAAV488	3A	22.9512	A	B	B	A	A	B	B	B	B	B	A	A	B	B	A	B	B	A	A	A	A	B	A	A	B	B	B	A	B	A	A	B	B	B	B	B	B	-	A	B	B	A	B	A	B	A
IWB32630	GENE-1742_70	3A	24.0227	A	B	B	A	A	B	B	B	B	B	A	A	B	B	A	B	B	A	A	A	A	B	A	A	B	B	B	A	B	A	A	B	B	B	B	B	B	-	A	A	B	A	B	A	B	B
IWB72935	Tdurum_contig63129_238	3A	25.4619	A	B	B	A	A	B	B	B	B	B	A	A	B	B	B	B	A	A	A	A	A	B	A	A	B	B	B	A	B	B	A	B	B	B	B	B	B	-	A	A	B	A	A	A	B	B
IWB72687	Tdurum_contig59782_86	3A	26.9221	A	B	B	A	A	B	B	B	B	B	A	A	B	B	B	B	A	A	A	A	A	B	A	A	B	B	B	B	B	B	A	A	B	B	B	B	B	A	A	A	B	A	A	A	B	B
IWB14015	CAP7_c3367_68	3A	26.9221	A	B	B	A	A	B	B	B	B	B	A	A	B	B	B	B	A	A	A	A	A	B	A	A	B	B	B	B	B	B	A	A	B	B	B	B	B	A	A	A	B	A	A	A	B	B
IWA3929	wsnp_Ex_c45213_51068305	3A	26.9221	A	B	B	A	A	B	B	B	B	B	A	A	B	B	B	B	A	A	A	A	A	B	A	A	B	B	B	B	B	B	A	A	B	B	B	B	B	A	A	A	B	A	A	A	B	B
IWA8061	wsnp_Ra_c7280_12576178	3A	26.9221	A	B	B	A	A	B	B	B	B	-	A	-	B	B	B	B	A	A	A	A	A	B	A	A	B	B	B	B	B	B	A	A	B	B	B	B	B	A	A	A	B	A	A	A	B	B
IWB50023	Kukri_rep_c70479_411	3A	26.9221	A	B	B	A	A	B	B	B	B	B	A	A	B	B	B	B	A	A	A	A	A	B	A	A	B	B	B	B	B	B	A	A	B	B	B	B	B	A	A	A	B	A	A	A	B	B
IWA1019	wsnp_CAP12_rep_c8867_3720285	3A	26.9221	A	B	B	A	A	B	B	B	B	B	A	A	B	B	B	B	A	A	A	A	A	B	A	A	B	B	B	B	B	B	A	A	B	B	B	B	B	A	A	A	B	A	A	A	B	B
IWB65798	TA004174-0504	3A	26.9221	A	B	B	A	A	B	B	B	B	B	A	A	B	B	B	B	A	A	A	A	A	B	A	A	B	B	B	B	B	B	A	A	B	B	B	B	B	A	A	A	B	A	A	A	B	B
IWB7614	BS00026189_51	3A	26.9221	A	B	B	A	A	B	B	B	B	B	A	A	B	B	B	B	A	A	A	A	A	B	A	A	B	B	B	B	B	B	A	A	B	B	B	B	B	A	A	A	B	A	A	A	B	B
IWB65564	TA002508-0190	3A	26.9221	A	B	B	A	A	B	B	B	B	B	A	A	B	B	B	B	A	A	A	A	A	B	A	A	B	B	B	B	B	B	A	A	B	B	B	B	B	A	A	A	B	A	A	A	B	B
IWB9982	BS00067190_51	3A	27.6165	A	B	B	A	A	B	B	B	B	B	A	A	B	B	B	B	A	A	A	A	A	B	A	A	B	B	B	B	B	B	A	A	B	B	B	B	B	A	A	A	B	A	A	A	B	B
IWA4075	wsnp_Ex_c5047_8963671	3A	27.6165	A	B	B	A	A	B	B	B	B	B	A	A	B	B	B	B	A	A	A	A	A	B	A	A	B	B	B	B	B	B	A	A	B	B	B	B	B	A	A	A	B	A	A	A	B	B
IWA234	wsnp_BE490613A_Ta_2_1	3A	28.3308	A	B	B	A	A	B	B	B	B	B	A	A	B	B	B	B	A	A	A	A	A	A	A	A	B	B	B	B	B	B	A	A	B	B	B	B	B	A	A	A	B	A	A	A	B	B
IWB73647	Tdurum_contig83663_371	3A	28.3308	A	B	B	A	A	B	B	B	B	B	A	A	B	B	B	B	A	A	A	A	A	A	A	A	B	B	B	B	B	B	A	A	B	B	B	B	B	A	A	A	B	A	A	A	B	B
IWB66938	Tdurum_contig11121_739	3A	30.1045	A	A	B	A	A	B	B	B	B	B	A	A	B	B	B	B	A	A	A	A	A	A	A	A	B	B	B	B	B	B	A	A	B	B	B	B	B	A	A	A	B	A	B	A	B	B
IWB36133	IACX6277	3A	30.8088	A	A	B	A	A	B	B	B	B	B	A	A	B	B	B	B	A	A	A	A	A	A	A	A	B	B	B	B	B	B	A	A	B	B	B	B	B	A	A	A	B	A	B	A	B	B
IWB5937	BS00003971_51	3A	30.8088	A	A	B	A	A	B	B	B	B	B	A	A	B	B	B	B	A	A	A	A	A	A	A	A	B	B	B	B	B	B	A	A	B	B	B	B	B	A	A	A	B	A	B	A	B	B
IWA5284	wsnp_Ex_rep_c66685_65003087	3A	30.8088	A	A	B	A	A	B	B	B	B	B	A	A	B	B	B	B	A	A	A	A	A	A	A	A	B	B	B	B	B	B	A	A	B	B	B	B	B	A	A	A	B	A	B	A	B	B
IWA3198	wsnp_Ex_c28930_38008757	3A	31.156	A	A	B	A	A	B	B	B	B	B	A	A	B	B	B	B	A	A	A	A	A	A	A	A	B	B	B	B	B	B	A	A	B	B	B	B	B	A	A	A	B	A	B	A	B	B
IWB50458	Kukri_rep_c87640_135	3A	31.8602	A	A	B	A	A	-	B	B	B	B	A	A	B	B	B	B	A	A	A	A	A	A	A	A	B	B	B	B	B	B	A	A	B	B	B	B	B	A	A	A	B	A	B	A	B	B
IWB36252	IACX787	3A	31.8602	A	A	B	A	A	B	B	B	B	B	A	A	B	B	B	B	A	A	A	A	A	A	A	A	B	B	B	B	B	B	A	A	B	B	B	B	B	A	A	A	B	A	B	A	B	B
IWB46127	Kukri_c51055_223	3A	36.8767	A	B	B	A	A	B	B	B	B	B	A	A	B	B	B	B	A	A	A	A	A	A	A	A	B	A	B	B	B	B	A	B	B	B	B	B	B	A	A	A	B	A	B	A	B	B
IWB71817	Tdurum_contig47509_93	3A	45.5692	A	A	B	A	A	B	B	B	B	A	A	A	B	B	B	B	B	B	A	A	A	A	A	A	B	A	A	B	B	B	A	B	B	B	B	B	B	A	A	A	B	B	A	A	B	B
IWB8831	BS00061179_51	3A	48.126	A	A	B	A	B	B	B	B	B	A	B	A	B	B	B	B	B	B	A	A	A	A	A	A	B	A	A	B	B	B	A	B	B	B	B	B	B	A	A	A	B	A	A	A	B	B
IWB8830	BS00061173_51	3A	48.126	A	A	B	A	B	B	B	B	B	A	B	A	B	B	B	B	B	B	A	A	A	A	A	A	B	A	A	B	B	B	A	B	B	B	B	B	B	A	A	A	B	A	A	A	B	B
IWA4926	wsnp_Ex_c9483_15722127	3A	48.126	A	A	B	A	B	B	B	B	B	A	B	A	B	B	B	B	B	B	A	A	A	A	A	A	B	A	A	B	B	B	A	B	B	B	B	B	B	A	A	A	B	A	A	A	B	B
IWB68047	Tdurum_contig13671_297	3A	51.1599	A	A	B	A	B	B	B	B	B	A	B	A	B	B	B	B	B	B	A	A	A	A	A	A	B	A	A	B	B	A	A	B	A	B	B	B	B	B	A	A	B	A	A	A	B	B
IWB71773	Tdurum_contig47186_1848	3A	51.1599	A	A	B	A	B	B	B	B	B	A	B	A	B	B	B	B	B	B	A	A	A	A	A	A	B	A	A	B	B	A	A	B	A	B	B	B	B	B	A	A	B	A	A	A	B	B
IWB71795	Tdurum_contig4742_140	3A	51.1599	A	A	B	A	B	-	B	B	B	A	B	A	B	B	B	B	B	B	A	A	A	A	A	A	B	A	A	B	B	A	A	B	A	B	B	B	B	B	A	A	B	A	A	A	B	B
IWB7357	BS00022989_51	3A	51.5145	A	A	B	A	B	B	B	B	B	A	B	A	B	B	B	B	B	B	A	A	A	A	A	A	B	A	A	B	B	A	A	B	A	B	B	B	B	B	A	A	B	A	A	A	B	B
IWB32613	GENE-1724_72	3A	51.5145	A	A	B	A	B	B	B	B	B	A	B	A	B	B	B	B	B	B	A	A	A	A	A	A	B	A	A	B	B	A	A	B	A	B	B	B	B	B	A	A	B	A	A	A	B	B
IWB74060	Tdurum_contig9912_451	3A	51.5145	A	A	B	A	B	B	B	B	B	A	B	A	B	B	B	B	B	B	A	A	A	A	A	A	B	A	A	B	B	A	A	B	A	B	B	B	B	B	A	A	B	A	A	A	B	B
IWB8136	BS00038663_51	3A	51.5145	A	A	B	A	B	B	B	B	B	A	B	A	B	B	B	B	B	B	A	A	A	A	A	A	B	A	A	B	B	A	A	B	A	B	B	B	B	B	A	A	B	A	A	A	B	B
IWB8137	BS00038664_51	3A	51.5145	A	A	B	A	B	B	B	B	B	A	B	A	B	B	B	B	B	B	A	A	A	A	A	A	B	A	A	B	B	A	A	B	A	B	B	B	B	B	A	A	B	A	A	A	B	B
IWB74059	Tdurum_contig9912_228	3A	51.5145	A	A	B	A	B	B	B	B	B	A	B	A	B	B	B	B	B	B	A	A	A	A	A	A	B	A	A	B	B	A	A	B	A	B	B	B	B	B	A	A	B	A	A	A	B	B
IWB74058	Tdurum_contig9912_216	3A	51.5145	A	A	B	A	B	B	B	B	B	A	B	A	B	B	B	B	B	B	A	A	A	A	A	A	B	A	A	B	B	A	A	B	A	B	B	B	B	B	A	A	B	A	A	A	B	B
IWB68005	Tdurum_contig13548_158	3A	51.5145	A	A	B	A	B	B	B	B	B	A	B	A	B	B	B	B	B	B	A	A	A	A	A	A	B	A	A	B	B	A	A	B	A	B	B	B	B	B	A	A	B	A	A	A	B	B
IWB4301	BobWhite_c716_644	3A	51.5145	A	A	B	A	B	B	B	B	B	A	B	A	B	B	B	B	B	B	A	A	A	A	A	A	B	A	A	B	B	A	A	B	A	B	B	B	B	B	A	A	B	A	A	A	B	B
IWA2348	wsnp_Ex_c18747_27625264	3A	51.5145	A	A	B	A	B	B	B	B	B	A	B	A	B	B	B	B	B	B	A	A	A	A	A	A	B	A	A	B	B	A	A	B	A	B	B	B	B	B	A	A	B	A	A	A	B	B
IWB9284	BS00064445_51	3A	51.8641	B	A	B	A	B	B	B	B	B	A	B	A	B	B	B	B	B	B	A	A	A	A	A	A	B	A	A	B	B	A	A	B	A	B	B	B	B	B	A	A	B	A	A	A	B	B
IWA4296	wsnp_Ex_c5623_9891427	3A	55.2525	B	A	B	A	B	B	B	B	B	A	B	A	B	B	B	B	B	B	A	B	A	A	A	A	B	A	B	B	B	A	A	B	A	B	B	B	B	B	A	A	B	B	A	A	B	B
IWA4298	wsnp_Ex_c5623_9891584	3A	55.2525	B	A	B	A	B	B	B	B	B	A	B	A	B	B	B	B	B	B	A	B	A	A	A	A	B	A	B	B	B	A	A	B	A	B	B	B	B	B	A	A	B	B	A	A	B	B
IWB7240	BS00022752_51	3A	55.6046	B	A	B	A	B	B	B	B	B	A	B	A	B	B	B	B	B	B	A	B	A	A	A	A	B	A	B	B	B	A	A	B	A	B	B	B	B	B	A	A	B	B	A	A	B	B
IWA7696	wsnp_Ra_c19079_28210937	3A	55.9643	B	A	B	A	B	B	B	B	B	A	B	A	B	B	B	B	B	B	A	B	A	A	A	A	B	B	B	B	B	A	A	B	A	B	B	B	B	B	A	A	B	B	A	A	B	B
IWB40965	Kukri_c1308_2782	3A	55.9643	B	A	B	A	B	B	B	B	B	A	B	A	B	B	B	B	B	B	A	B	A	A	A	A	B	B	B	B	B	A	A	B	A	B	B	B	B	B	A	A	B	B	A	A	B	B
IWB13444	CAP12_c5387_372	3A	57.0359	B	A	B	A	B	-	B	B	B	A	B	A	B	B	B	B	B	B	A	B	A	A	A	A	B	B	B	B	B	A	A	B	A	B	B	B	B	B	A	A	B	B	B	A	B	A
IWB39571	Ku_c52173_572	3A	57.0359	B	A	B	A	B	B	B	B	B	A	B	A	B	B	B	B	B	B	A	B	A	A	A	A	B	B	B	B	B	A	A	B	A	B	B	B	B	B	A	A	B	B	B	A	B	A
IWA4810	wsnp_Ex_c8517_14315660	3A	57.0359	B	A	B	A	B	B	B	B	B	A	B	A	B	B	B	B	B	B	A	B	A	A	A	A	B	B	B	B	B	A	A	B	A	B	B	B	B	B	A	A	B	B	B	A	B	A
IWB73699	Tdurum_contig8584_354	3A	61.6286	A	A	B	A	B	B	B	B	B	A	B	A	B	B	B	B	B	B	A	A	B	A	A	A	B	B	B	B	B	A	A	B	A	B	B	B	B	B	A	A	B	B	B	A	B	A
IWB73056	Tdurum_contig67196_285	3A	61.6286	A	A	B	A	B	B	B	B	B	A	B	A	B	B	B	B	B	B	A	A	B	A	A	A	B	B	B	B	B	A	A	B	A	B	B	B	B	B	A	A	B	B	B	A	B	A
IWB71562	Tdurum_contig44880_134	3A	61.6286	A	A	B	A	B	B	B	B	B	A	B	A	B	B	B	B	B	B	A	A	B	A	A	A	B	B	B	B	B	A	A	B	A	B	B	B	B	B	A	A	B	B	B	A	B	A
IWB71564	Tdurum_contig44880_420	3A	61.6286	A	A	B	A	B	B	B	B	B	A	B	A	B	B	B	B	B	B	A	A	B	A	A	A	B	B	B	B	B	A	A	B	A	B	B	B	B	B	A	A	B	B	B	A	B	A
IWA855	wsnp_CAP11_rep_c4226_1995152	3A	64.9917	A	A	A	A	B	B	B	B	B	A	B	A	B	B	B	B	B	B	A	A	B	A	A	A	B	B	B	B	B	B	A	B	A	B	B	B	B	B	B	A	B	B	B	A	B	A
IWB40736	Kukri_c12079_204	3A	64.9917	A	A	A	A	B	B	B	B	B	A	B	A	B	B	B	B	B	B	A	A	B	A	A	A	B	B	B	B	B	B	A	B	A	B	B	B	B	B	B	A	B	B	B	A	B	A
IWB11200	BS00081610_51	3A	64.9917	A	A	A	A	B	B	B	B	B	A	B	A	B	B	B	B	B	B	A	A	B	A	A	A	B	B	B	B	B	B	A	B	A	B	B	B	B	B	B	A	B	B	B	A	B	A
IWB2973	BobWhite_c38444_238	3A	64.9917	A	A	A	A	B	B	B	B	B	A	B	A	B	B	B	B	B	B	A	A	B	A	A	A	B	B	B	B	B	B	A	B	A	B	B	B	B	B	B	A	B	B	B	A	B	A
IWB72897	Tdurum_contig62557_263	3A	65.3413	A	A	A	A	B	B	B	B	B	A	B	A	B	B	B	B	B	B	A	A	B	A	A	A	B	B	B	B	B	B	A	B	A	B	B	B	B	B	B	A	B	B	B	A	B	A
IWB73102	Tdurum_contig68305_703	3A	65.3413	A	A	A	A	B	B	B	B	B	A	B	A	B	B	B	B	B	B	A	A	B	A	A	A	B	B	B	B	B	B	A	B	A	B	B	B	B	B	B	A	B	B	B	A	B	A
IWB11581	BS00088756_51	3A	65.3413	A	A	A	A	B	B	B	B	B	A	B	A	B	B	B	B	B	B	A	A	B	A	A	A	B	B	B	B	B	B	A	B	A	B	B	B	B	B	B	A	B	B	B	A	B	A
IWB11580	BS00088755_51	3A	65.3413	A	A	A	A	B	B	B	B	B	A	B	A	B	B	B	B	B	B	A	A	B	A	A	A	B	B	B	B	B	B	A	B	A	B	B	B	B	B	B	A	B	B	B	A	B	A
IWB72394	Tdurum_contig54800_615	3A	69.9696	A	A	A	A	B	B	B	B	B	A	B	A	B	B	B	B	B	A	A	A	B	A	A	A	B	B	B	-	B	B	B	B	A	B	B	B	B	B	B	A	B	B	B	A	B	A
IWB12566	BS00110564_51	3A	70.6789	A	A	A	A	B	B	B	B	B	A	B	A	B	B	B	B	B	A	A	A	B	A	A	A	B	B	B	-	B	B	B	B	A	B	B	B	B	B	B	A	B	B	B	A	B	A
IWB20737	Ex_c4465_882	3A	70.6789	A	A	A	A	B	B	B	B	B	A	B	A	B	B	B	B	B	A	A	A	B	A	A	A	B	B	B	-	B	B	B	B	A	B	B	B	B	B	B	A	B	B	B	A	B	A
IWB12563	BS00110550_51	3A	70.6789	A	A	A	A	B	-	B	B	B	A	B	A	B	B	B	B	B	A	A	A	B	A	A	A	B	B	B	-	B	B	B	B	A	B	B	B	B	B	B	A	B	B	B	A	B	A
IWB7543	BS00024548_51	3A	74.5624	A	A	A	A	B	B	B	B	B	A	B	A	B	B	B	B	B	A	B	A	B	A	A	A	B	B	B	-	B	B	B	B	A	B	B	B	B	B	B	A	B	B	B	A	B	A
IWB9995	BS00067228_51	3A	74.5624	A	A	A	A	B	B	B	B	B	A	B	A	B	B	B	B	B	A	B	A	B	A	A	A	B	B	B	-	B	B	B	B	A	B	B	B	B	B	B	A	B	B	B	A	B	A
IWA1207	wsnp_CAP8_c6939_3242530	3A	84.265	A	B	A	A	B	B	B	B	A	-	B	A	B	B	B	B	B	A	B	A	B	A	B	B	A	B	B	B	B	B	B	B	A	A	B	B	B	B	B	A	B	B	B	A	B	A
IWB2639	BobWhite_c3356_442	3A	88.0313	A	B	A	A	B	B	B	B	A	-	B	A	B	B	A	B	B	A	B	A	B	B	B	B	A	B	B	B	B	B	B	B	A	-	B	B	A	B	B	A	B	B	B	A	B	A
IWB37509	JD_c48734_1188	3A	88.381	A	B	A	A	B	B	B	B	A	-	B	A	B	B	A	B	B	A	B	A	B	B	B	B	A	B	B	B	B	B	B	B	A	-	B	B	A	B	B	A	B	B	B	A	B	A
IWB51851	Ra_c3287_1405	3A	88.381	A	B	A	A	B	B	B	B	A	-	B	A	B	B	A	B	B	A	B	A	B	B	B	B	A	B	B	B	B	B	B	B	A	-	B	B	A	B	B	A	B	B	B	A	B	A
IWB366	BobWhite_c12428_371	3A	91.719	A	B	A	A	B	B	B	B	A	-	B	B	B	B	A	B	B	B	B	A	B	B	B	B	A	B	B	B	B	B	B	B	A	-	B	B	A	B	A	A	A	B	B	A	B	A
IWB39410	Ku_c4231_940	3A	92.4184	A	B	A	A	B	B	B	B	A	-	B	B	B	B	A	B	B	B	B	A	B	B	B	B	A	B	B	B	B	B	B	B	A	-	B	B	A	B	A	A	A	B	B	A	A	A
IWB8509	BS00048633_51	3A	101.534	A	B	A	A	B	B	B	B	A	-	B	A	B	B	A	B	B	B	B	B	B	A	B	B	A	B	B	A	B	A	B	A	A	B	B	B	A	B	A	B	A	B	B	A	-	A
IWB7347	BS00022968_51	3A	105.244	A	B	A	B	B	B	B	B	A	-	B	A	B	B	A	A	B	B	A	B	B	A	B	B	A	B	B	A	B	A	B	A	A	B	B	B	A	B	B	B	A	B	B	A	-	A
IWB5933	BS00003956_51	3A	105.244	A	B	A	B	B	B	B	B	A	A	B	A	B	B	A	A	B	B	A	B	B	A	B	B	A	B	B	A	B	A	B	A	A	B	B	B	A	B	B	B	A	B	B	A	A	A
IWB12103	BS00099980_51	3A	105.244	A	B	A	B	B	B	B	B	A	A	B	A	B	B	A	A	B	B	A	B	B	A	B	B	A	B	B	A	B	A	B	A	A	B	B	B	A	B	B	B	A	B	B	A	-	A
IWB14374	CAP7_rep_c12537_81	3A	105.244	A	B	A	B	B	B	B	B	A	A	B	A	B	B	A	A	B	B	A	B	B	A	B	B	A	B	B	A	B	A	B	A	A	B	B	B	A	B	B	B	A	B	B	A	-	A
IWB8784	BS00059618_51	3A	105.594	A	B	A	B	B	B	B	B	A	-	B	A	B	B	A	A	B	B	A	B	B	A	B	B	A	B	B	A	B	A	B	A	A	B	B	B	A	B	B	B	A	B	B	A	A	A
IWB12017	BS00097939_51	3A	105.594	A	B	A	B	B	B	B	B	A	-	B	A	B	B	A	A	B	B	A	B	B	A	B	B	A	B	B	A	B	A	B	A	A	B	B	B	A	B	B	B	A	B	B	A	-	A
IWB814	BobWhite_c15582_253	3A	105.943	A	B	A	B	B	B	B	B	A	-	B	A	B	B	A	A	B	B	A	B	B	A	B	B	A	B	B	A	B	A	B	A	A	B	B	B	A	B	B	B	A	B	B	A	-	A
IWA5190	wsnp_Ex_rep_c66274_64426834	3A	111.783	A	B	A	B	A	A	A	A	A	-	B	A	B	B	A	A	B	B	A	B	B	A	B	B	A	B	B	A	B	A	B	A	A	B	B	B	A	B	B	B	A	A	B	A	-	A
IWB68042	Tdurum_contig13646_292	3A	111.783	A	B	A	B	A	A	A	A	A	-	-	A	B	-	A	A	B	B	A	B	B	A	B	B	A	B	B	A	B	A	B	A	A	B	B	B	A	B	B	B	A	A	B	A	-	A
IWA2396	wsnp_Ex_c19309_28242774	3A	111.783	A	B	A	B	A	-	A	A	A	-	B	A	B	B	A	A	B	B	A	B	B	A	B	B	A	B	B	A	B	A	B	A	A	B	B	B	A	B	B	B	A	A	B	A	-	A
IWA1457	wsnp_Ex_c11229_18163892	3A	118.796	A	B	A	A	A	A	A	A	B	A	B	A	A	B	A	B	B	B	A	B	B	A	B	B	A	B	B	A	B	A	A	A	A	B	B	B	A	B	B	B	B	A	B	A	A	A
IWA4407	wsnp_Ex_c60462_60905848	3A	119.141	A	B	A	A	A	A	A	A	B	A	B	A	A	B	A	B	B	B	A	B	B	A	B	B	A	B	B	A	B	A	A	A	A	B	B	B	A	B	B	B	B	A	B	A	A	A
IWB64431	RFL_Contig3626_521	3B	0	B	A	A	B	A	B	B	B	B	B	B	A	B	B	B	B	B	B	A	B	B	A	A	A	B	B	A	B	A	A	B	A	A	A	B	B	B	B	B	A	A	B	A	B	A	B
IWB41709	Kukri_c17082_378	3B	0	B	A	A	B	A	B	B	B	B	B	B	A	B	B	B	B	B	B	A	B	B	A	A	A	B	B	A	B	A	A	B	A	A	A	B	B	B	B	B	A	A	B	A	B	A	B
IWB11873	BS00094406_51	3B	0	B	A	A	B	A	B	B	B	B	B	B	A	B	B	B	B	B	B	A	B	B	A	A	A	B	B	A	B	A	A	B	A	A	A	B	B	B	B	B	A	A	B	A	B	A	B
IWB55980	RAC875_c26767_158	3B	0	B	A	A	B	A	B	B	B	B	B	B	A	B	B	B	B	B	B	A	B	B	A	A	A	B	B	A	B	A	A	B	A	A	A	B	B	B	B	B	A	A	B	A	B	A	B
IWB9366	BS00064776_51	3B	1.43917	B	A	A	B	A	B	B	B	A	B	B	A	B	B	B	B	B	B	A	B	B	A	A	A	B	B	A	B	A	A	B	-	A	A	B	B	B	A	B	A	A	B	A	B	A	B
IWB8883	BS00062676_51	3B	1.43917	B	A	A	B	A	B	B	B	A	B	B	A	B	B	B	B	B	B	A	B	B	A	A	A	B	B	A	B	A	A	B	-	A	A	B	B	B	A	B	A	A	B	A	B	A	B
IWB71815	Tdurum_contig47506_495	3B	1.43917	B	A	A	B	A	B	B	B	A	B	B	A	B	B	B	B	B	B	A	B	B	A	A	A	B	B	A	B	A	A	B	-	A	A	B	B	B	A	B	A	A	B	A	B	A	B
IWB71814	Tdurum_contig47506_269	3B	1.43917	B	A	A	B	A	B	B	B	A	B	B	A	B	B	B	B	B	B	A	B	B	A	A	A	B	B	A	B	A	A	B	-	A	A	B	B	B	A	B	A	A	B	A	B	A	B
IWB71813	Tdurum_contig47506_251	3B	1.43917	B	A	A	B	A	B	B	B	A	B	B	A	B	B	B	B	B	B	A	B	B	A	A	A	B	B	A	B	A	A	B	-	A	A	B	B	B	A	B	A	A	B	A	B	A	B
IWB64176	RFL_Contig3008_1370	3B	1.43917	B	A	A	B	A	B	B	B	A	B	B	A	B	B	B	B	B	B	A	B	B	A	A	A	B	B	A	B	A	A	B	-	A	A	B	B	B	A	B	A	A	B	A	B	A	B
IWB24960	Excalibur_c30368_56	3B	1.43917	B	A	A	B	A	B	B	B	A	B	B	A	B	B	B	B	B	B	A	B	B	A	A	A	B	B	A	B	A	A	B	-	A	A	B	B	B	A	B	A	A	B	A	B	A	B
IWB33644	GENE-3869_1166	3B	1.43917	B	A	A	B	A	B	B	B	A	B	B	A	B	B	B	B	B	B	A	B	B	A	A	A	B	B	A	B	A	A	B	-	A	A	B	B	B	A	B	A	A	B	A	B	A	B
IWB71498	Tdurum_contig44159_245	3B	1.43917	B	A	A	B	A	B	B	B	A	B	B	A	B	B	B	B	B	B	A	B	B	A	A	A	B	B	A	B	A	A	B	-	A	A	B	B	B	A	B	A	A	B	A	B	A	B
IWB36829	Jagger_c9935_144	3B	2.12884	B	A	A	B	A	B	B	B	A	B	B	A	B	B	B	B	B	B	A	B	B	A	A	A	B	B	A	B	A	A	B	-	A	A	B	B	A	A	B	A	A	B	A	B	A	B
IWB35226	IAAV6644	3B	2.12884	B	A	A	B	A	B	B	B	A	B	B	A	B	B	B	B	B	B	A	B	B	A	A	A	B	B	A	B	A	A	B	-	A	A	B	B	A	A	B	A	A	B	A	B	A	B
IWB67771	Tdurum_contig12899_83	3B	2.12884	B	A	A	B	A	B	B	B	A	B	B	A	B	B	B	B	B	B	A	B	B	A	A	A	B	B	A	B	A	A	B	-	A	A	B	B	A	A	B	A	A	B	A	B	A	B
IWB8756	BS00058861_51	3B	2.12884	B	A	A	B	A	B	B	B	A	B	B	A	B	B	B	B	B	B	A	B	B	A	A	A	B	B	A	B	A	A	B	-	A	A	B	B	A	A	B	A	A	B	A	B	A	B
IWB6979	BS00022229_51	3B	4.98895	B	A	A	B	A	B	B	B	A	B	B	A	B	B	B	B	A	B	A	B	B	A	A	A	B	B	A	B	A	A	B	A	A	A	B	A	A	A	-	A	A	B	A	B	A	B
IWB51276	Ra_c17608_960	3B	5.32907	B	A	A	B	A	B	B	B	A	B	B	A	B	B	B	B	A	B	A	B	B	A	A	A	B	B	A	B	A	A	B	A	A	A	B	A	A	A	-	A	A	B	A	B	A	B
IWB72762	Tdurum_contig61004_483	3B	5.32907	B	A	A	B	A	B	B	B	A	B	B	A	B	B	B	B	A	B	A	B	B	A	A	A	B	B	A	B	A	A	B	A	A	A	B	A	A	A	-	A	A	B	A	B	A	B
IWA4801	wsnp_Ex_c8386_14128029	3B	6.70867	B	A	A	B	A	B	B	B	A	B	B	A	B	B	B	B	A	B	A	B	B	A	A	A	B	B	A	B	A	A	B	A	A	A	B	A	A	A	-	A	A	B	A	B	A	B
IWB73474	Tdurum_contig8045_402	3B	6.70867	B	A	A	B	A	B	B	B	A	B	B	A	B	B	B	B	A	B	A	B	B	A	A	A	B	B	A	B	A	A	B	A	A	A	B	A	A	A	-	A	A	B	A	B	A	B
IWB12745	CAP11_c2057_200	3B	6.70867	B	A	A	B	A	B	B	B	A	B	B	A	B	B	B	B	A	B	A	B	B	A	A	A	B	B	A	B	A	A	B	A	A	A	B	A	A	A	-	A	A	B	A	B	A	B
IWB66636	Tdurum_contig10608_948	3B	6.70867	B	A	A	B	A	B	B	B	A	B	B	A	B	B	B	B	A	B	A	B	B	A	A	A	B	B	A	B	A	A	B	A	A	A	B	A	A	A	A	A	A	B	A	B	A	B
IWB8467	BS00047528_51	3B	6.70867	B	A	A	B	A	B	B	B	A	B	B	A	B	B	B	B	A	B	A	B	B	A	A	A	B	B	A	B	A	A	B	A	A	A	B	A	A	A	A	A	A	B	A	B	A	B
IWB73269	Tdurum_contig75400_998	3B	9.24694	B	A	A	B	A	-	B	-	A	B	B	A	B	B	B	B	A	B	A	B	B	A	A	A	A	B	A	B	A	A	B	A	A	A	B	A	A	B	A	A	A	B	A	B	A	B
IWA2691	wsnp_Ex_c22154_31342077	3B	9.24694	B	A	A	B	A	-	B	-	A	B	B	A	B	B	B	B	A	B	A	B	B	A	A	A	A	B	A	B	A	A	B	A	A	A	B	A	A	B	A	A	A	B	A	B	A	B
IWA2908	wsnp_Ex_c24548_33795073	3B	9.24694	B	A	A	B	A	-	B	-	A	B	B	A	B	B	B	B	A	B	A	B	B	A	A	A	A	B	A	B	A	A	B	A	A	A	B	A	A	B	A	A	A	B	A	B	A	B
IWB73877	Tdurum_contig93507_1345	3B	16.0339	B	A	B	B	B	A	A	A	A	B	B	A	B	B	B	B	A	A	A	B	B	A	A	A	A	B	A	B	A	A	B	A	A	A	B	A	A	B	B	A	A	B	A	B	A	B
IWB32689	GENE-1856_1151	3B	17.4328	A	A	B	B	B	A	A	A	A	B	B	A	B	B	B	B	B	A	A	B	B	A	A	A	A	B	A	B	A	A	B	A	A	A	B	A	A	B	B	A	A	B	A	B	A	B
IWB29378	Excalibur_c9206_836	3B	17.4328	A	A	B	B	B	A	A	A	A	-	B	A	B	-	B	B	B	A	A	B	B	A	A	A	A	B	A	B	A	A	B	A	A	A	B	A	A	B	B	A	A	B	A	B	A	B
IWA7647	wsnp_Ra_c16264_24873670	3B	18.4968	A	A	B	B	B	A	A	A	A	B	B	A	B	B	B	B	B	A	A	B	B	A	A	A	A	B	A	B	A	A	B	A	A	A	B	A	A	B	B	A	A	B	A	B	A	B
IWB36123	IACX6214	3B	19.5313	A	A	B	B	B	A	A	A	A	B	B	A	B	B	B	B	A	A	A	B	B	A	A	A	A	B	A	B	A	A	B	A	A	A	B	A	A	B	B	A	A	B	A	B	A	B
IWB34803	IAAV3924	3B	22.7967	A	A	B	B	B	A	A	A	B	A	B	A	B	B	B	B	A	A	A	B	B	A	A	A	A	B	A	B	A	A	B	A	A	A	B	A	A	B	B	A	A	B	B	B	A	B
IWB67002	Tdurum_contig11297_571	3B	23.1391	A	A	B	B	B	A	A	A	B	A	B	A	B	B	B	B	A	A	A	B	B	A	A	A	A	B	A	B	A	A	B	A	A	A	B	A	A	B	B	A	B	B	B	B	A	B
IWB72015	Tdurum_contig49753_191	3B	23.1391	A	A	B	B	B	A	A	A	B	A	B	A	B	B	B	B	A	A	A	B	B	A	A	A	A	B	A	B	A	A	B	A	A	A	B	A	A	B	B	A	B	B	B	B	A	B
IWB39127	Ku_c30806_235	3B	26.4283	A	A	B	B	B	A	A	A	B	A	B	A	B	A	B	B	A	A	A	B	B	A	A	A	A	B	A	B	A	A	B	A	A	A	A	A	A	B	B	A	B	A	-	B	A	B
IWB68984	Tdurum_contig22897_107	3B	27.1326	A	A	B	B	A	A	A	A	B	A	B	A	B	A	B	B	A	A	A	B	B	A	A	A	A	B	A	B	A	A	B	A	A	A	A	A	A	B	B	A	B	B	-	B	A	B
IWB6987	BS00022242_51	3B	38.7393	B	A	B	A	A	A	A	A	B	A	B	A	B	A	B	B	A	A	B	B	B	A	B	B	A	B	A	B	A	-	B	A	B	B	A	A	A	B	B	A	B	A	-	A	A	A
IWB25620	Excalibur_c35645_587	3B	41.8199	B	A	B	A	A	A	A	A	B	A	B	A	B	A	B	B	A	A	B	B	B	A	B	B	A	B	A	A	A	-	B	A	B	B	A	A	A	B	B	A	B	A	-	A	A	A
IWB41163	Kukri_c14140_347	3B	42.5499	B	A	B	A	A	A	A	A	B	A	A	A	B	A	B	B	A	A	B	B	B	A	B	B	A	B	A	A	A	-	B	A	B	B	A	A	A	B	B	A	B	A	-	A	A	A
IWB14564	CAP8_c1799_237	3B	42.5499	B	A	B	A	A	A	A	A	B	A	A	A	B	A	B	B	A	A	B	B	B	A	B	B	A	B	A	A	A	-	B	A	B	B	A	A	A	B	B	A	B	A	-	A	A	A
IWA747	wsnp_CAP11_c323_263628	3B	42.5499	B	A	B	A	A	A	A	A	B	A	A	A	B	A	B	B	A	A	B	B	B	A	B	B	A	B	A	A	A	-	B	A	B	B	A	A	A	B	B	A	B	A	-	A	A	A
IWB32713	GENE-1900_115	3B	44.0208	B	A	B	A	A	A	A	A	B	A	A	A	B	A	B	B	A	A	B	B	B	A	B	B	A	B	A	A	A	-	B	A	B	B	A	A	A	B	B	A	B	A	-	A	A	A
IWB245	BobWhite_c11621_123	3B	44.0208	B	A	B	A	A	A	A	A	B	A	A	A	B	A	B	B	A	A	B	B	B	A	B	B	A	B	A	A	A	-	B	A	B	B	A	A	A	B	B	A	B	A	-	A	A	A
IWB27781	Excalibur_c58066_180	3B	44.3831	B	A	B	A	A	A	A	A	B	A	A	A	B	A	B	B	A	A	B	B	B	A	B	B	A	B	A	A	A	-	B	A	B	B	A	A	A	B	B	A	B	A	-	A	A	A
IWA3726	wsnp_Ex_c4063_7344641	3B	44.3831	B	A	B	A	A	A	A	A	B	A	A	A	B	A	B	B	A	A	B	B	B	A	B	B	A	B	A	A	A	-	B	A	B	B	A	A	A	B	B	A	B	A	-	A	A	A
IWA1459	wsnp_Ex_c11246_18191331	3B	46.9779	B	A	B	B	A	A	A	A	B	A	A	B	B	A	B	B	A	A	B	B	B	A	B	B	A	B	A	A	A	-	B	A	B	B	A	A	A	A	B	A	B	A	A	A	A	A
IWB12191	BS00102622_51	3B	46.9779	B	A	B	B	A	A	A	A	B	A	A	B	B	A	B	B	A	A	B	B	B	A	B	B	A	B	A	A	A	-	B	A	B	B	A	A	A	A	B	A	B	A	A	A	A	A
IWB35398	IAAV7872	3B	46.9779	B	A	B	B	A	A	A	A	B	A	A	B	B	A	B	B	A	A	B	B	B	A	B	B	A	B	A	A	A	-	B	A	B	B	A	A	A	A	B	A	B	A	A	A	A	A
IWB6436	BS00011570_51	3B	46.9779	B	A	B	B	A	A	A	A	B	A	A	B	B	A	B	B	A	A	B	B	B	A	B	B	A	B	A	A	A	-	B	A	B	B	A	A	A	A	B	A	B	A	A	A	A	A
IWA5325	wsnp_Ex_rep_c66896_65307566	3B	47.335	B	A	B	B	A	A	A	A	B	A	A	B	B	A	B	B	A	A	B	B	B	A	B	B	A	B	A	A	A	-	B	A	B	B	A	A	A	A	B	A	B	A	A	A	A	A
IWB60844	RAC875_c86306_256	3B	48.7952	B	A	B	B	A	-	A	A	B	A	A	B	B	A	B	B	A	A	B	B	B	A	B	B	A	B	A	A	A	-	B	A	B	B	A	A	A	A	B	A	B	A	A	A	A	A
IWB71531	Tdurum_contig44588_1549	3B	54.6812	B	A	B	B	B	A	A	A	B	A	A	B	B	A	B	A	A	A	A	B	B	A	B	B	A	A	A	A	A	-	B	A	B	B	A	A	B	A	B	A	B	A	A	A	A	A
IWB11463	BS00086717_51	3B	56.8564	B	A	B	B	B	A	A	A	B	A	A	B	B	A	B	A	A	A	A	B	B	A	B	B	A	A	A	A	A	B	B	A	B	B	A	A	B	A	-	A	B	A	A	A	A	A
IWB71405	Tdurum_contig43263_243	3B	56.8564	B	A	B	B	B	A	A	A	B	A	A	B	B	A	B	A	A	A	A	B	B	A	-	B	A	A	A	A	A	B	B	A	B	B	A	A	B	A	-	A	B	A	A	A	A	A
IWB9734	BS00066149_51	3B	56.8564	B	A	B	B	B	A	A	A	B	A	A	B	B	A	B	A	A	A	A	B	B	A	B	B	A	A	A	A	A	B	B	A	B	B	A	A	B	A	-	A	B	A	A	A	A	A
IWB27448	Excalibur_c54025_104	3B	56.8564	B	A	B	B	B	A	A	A	B	A	A	B	B	A	B	A	A	A	A	B	B	A	B	B	A	A	A	A	A	B	B	A	B	B	A	A	B	A	-	A	B	A	A	A	A	A
IWB7733	BS00029548_51	3B	63.4837	B	B	B	B	B	A	A	A	B	A	A	B	B	A	B	A	A	A	A	B	B	A	B	B	A	A	A	A	A	B	A	A	B	B	A	A	B	A	-	A	A	B	A	A	A	A
IWB12042	BS00098496_51	3B	63.4837	B	B	B	B	B	A	A	A	B	A	A	B	B	A	B	A	A	A	A	B	B	A	B	B	A	A	A	A	A	B	A	A	B	B	A	A	B	A	-	A	A	B	A	A	A	A
IWB8317	BS00042337_51	3B	63.4837	B	B	B	B	B	A	A	A	B	A	A	B	B	A	B	A	A	A	A	B	B	A	B	B	A	A	A	A	A	B	A	A	B	B	A	A	B	A	-	A	A	B	A	A	A	A
IWB73051	Tdurum_contig6693_787	3B	63.8309	B	B	B	B	B	A	A	A	B	A	A	B	B	A	B	A	A	A	A	B	B	A	B	B	A	A	A	A	A	B	A	A	B	A	A	A	B	A	B	A	A	B	A	A	A	A
IWB72453	Tdurum_contig55486_176	3B	65.2598	B	B	A	B	B	A	A	A	-	A	A	B	B	A	B	A	A	A	A	B	B	A	B	B	A	A	-	A	A	B	A	A	B	A	A	A	B	A	B	A	A	B	B	A	A	A
IWB40103	Ku_c8631_308	3B	67.0462	B	B	A	B	B	A	A	A	-	A	A	B	B	A	B	A	A	A	A	B	B	A	B	B	A	A	-	A	A	B	A	A	B	A	A	A	B	A	B	A	A	B	B	A	A	A
IWA7595	wsnp_Ra_c12935_20587578	3B	67.0462	B	B	A	B	B	A	A	A	-	A	A	B	B	A	B	A	A	A	A	B	B	A	B	B	A	A	-	A	A	B	A	A	B	A	A	A	B	A	B	A	A	B	B	A	A	A
IWB36387	IACX9430	3B	67.0462	B	B	A	B	B	A	A	A	-	A	A	B	B	A	B	A	A	A	A	B	B	A	B	B	A	A	-	A	A	B	A	A	B	A	A	A	B	A	B	A	A	B	B	A	A	A
IWB7502	BS00023645_51	3B	69.2057	B	B	A	B	A	A	A	A	-	B	A	B	B	A	B	A	A	A	A	B	B	A	B	B	A	A	-	A	A	B	A	A	B	A	A	A	B	A	B	A	A	B	B	A	A	A
IWA7905	wsnp_Ra_c38981_46788555	3B	69.2057	B	B	A	B	A	A	A	A	-	B	A	B	B	A	B	A	A	A	A	B	B	A	B	B	A	A	-	A	A	B	A	A	B	A	A	A	B	A	B	A	A	B	B	A	A	A
IWB35700	IACX11401	3B	69.2057	B	B	A	B	A	A	A	A	-	B	A	B	B	A	B	A	A	A	A	B	B	A	-	B	A	A	-	A	A	B	A	A	B	A	A	A	B	A	B	A	A	B	B	A	A	A
IWA5886	wsnp_JD_c1816_2522844	3B	69.2057	B	B	A	B	A	A	A	A	-	B	A	B	B	A	B	A	A	A	A	B	B	A	-	B	A	A	-	A	A	B	A	A	B	A	A	A	B	A	B	A	A	B	B	A	A	A
IWB28828	Excalibur_c77101_90	3B	69.2057	B	B	A	B	A	A	A	A	-	B	A	B	B	A	B	A	A	A	A	B	B	A	B	B	A	A	-	A	A	B	A	A	B	A	A	A	B	A	B	A	A	B	B	A	A	A
IWB40552	Kukri_c11259_55	3B	69.2057	B	B	A	B	A	A	A	A	-	B	A	B	B	A	B	A	A	A	A	B	B	A	B	B	A	A	-	A	A	B	A	A	B	A	A	A	B	A	B	A	A	B	B	A	A	A
IWB35991	IACX5407	3B	69.2057	B	B	A	B	A	A	A	A	-	B	A	B	B	A	B	A	A	A	A	B	B	A	B	B	A	A	-	A	A	B	A	A	B	A	A	A	B	A	B	A	A	B	B	A	A	A
IWB8186	BS00039734_51	3B	69.2057	B	B	A	B	A	A	A	A	B	B	A	B	B	A	B	A	A	A	A	B	B	A	B	B	A	A	-	A	A	B	A	A	B	A	A	A	B	A	B	A	A	B	B	A	A	A
IWA1898	wsnp_Ex_c14462_22457559	3B	69.2057	B	B	A	B	A	A	A	A	B	B	A	B	B	A	B	A	A	A	A	B	B	A	B	B	A	A	-	A	A	B	A	A	B	A	A	A	B	A	B	A	A	B	B	A	A	A
IWB65618	TA002920-0166-w	3B	69.2057	B	B	A	B	A	A	A	A	-	B	A	B	B	A	B	A	A	A	A	B	B	A	B	B	A	A	-	A	A	B	A	A	B	A	A	A	B	A	B	A	A	B	B	A	A	A
IWB2766	BobWhite_c35249_110	3B	69.5553	B	B	A	B	A	A	A	A	-	B	A	B	B	A	B	A	A	A	A	B	B	A	B	B	A	B	-	A	A	B	A	A	B	A	A	A	B	A	B	A	A	B	B	A	A	A
IWB73314	Tdurum_contig75784_771	3B	69.5553	B	B	A	B	A	A	A	A	-	B	A	B	B	A	B	A	A	A	A	B	B	A	B	B	A	B	A	A	A	B	A	A	B	A	A	A	B	A	B	A	A	B	B	A	A	A
IWB10777	BS00074997_51	3B	69.5553	B	B	A	B	A	A	A	A	-	B	A	B	B	A	B	A	A	A	A	B	B	A	B	B	A	B	A	A	A	B	A	A	B	A	A	A	B	A	B	A	A	B	B	A	A	A
IWB22528	Excalibur_c14999_712	3B	69.9001	B	B	A	B	A	A	A	A	-	B	A	B	B	A	B	A	A	A	A	B	B	A	B	B	A	B	A	A	A	B	A	A	B	A	A	A	B	A	B	A	A	B	B	A	A	A
IWB73215	Tdurum_contig73039_241	3B	74.0136	B	B	A	B	A	A	A	A	A	B	A	B	B	A	B	B	A	A	A	B	B	A	B	B	A	B	A	A	A	B	A	A	B	A	A	A	B	B	B	A	A	B	A	A	A	A
IWB72928	Tdurum_contig63030_778	3B	74.0136	B	B	A	B	A	A	A	A	A	B	A	B	B	A	B	B	A	A	A	B	B	A	B	B	A	B	A	A	A	B	A	A	B	A	A	A	B	B	B	A	A	B	A	A	A	A
IWB73182	Tdurum_contig70783_1548	3B	74.0136	B	B	A	B	A	A	A	A	A	B	A	B	B	A	B	B	A	A	A	B	B	A	B	B	A	B	A	A	A	B	A	A	B	A	A	A	B	B	B	A	A	B	A	A	A	A
IWB11599	BS00089166_51	3B	77.4278	-	B	A	B	A	A	A	A	A	B	B	B	B	A	A	B	B	A	A	B	B	A	B	B	A	B	A	A	A	B	A	A	B	A	A	A	B	A	A	A	A	B	A	A	A	A
IWA7516	wsnp_Ku_rep_c72821_72480395	3B	79.2271	B	B	A	B	A	A	A	A	A	B	B	B	A	A	A	B	A	A	A	B	B	A	B	B	A	B	-	A	A	B	A	A	B	A	A	A	B	A	A	A	A	B	A	A	A	A
IWB11493	BS00087279_51	3B	79.2271	B	B	A	B	A	A	A	A	A	B	B	B	A	A	A	B	A	A	A	B	B	A	B	B	A	B	-	A	A	B	A	A	B	A	A	A	B	A	A	A	A	B	A	A	A	A
IWB65525	TA002266-1244	3B	79.2271	B	B	A	B	A	A	A	A	A	B	B	B	A	A	A	B	A	A	A	B	B	A	B	B	A	B	-	A	A	B	A	A	B	A	A	A	B	A	A	A	A	B	A	A	A	A
IWB71876	Tdurum_contig48224_272	3B	79.2271	B	B	A	B	A	A	A	A	A	B	B	B	A	A	A	B	A	A	A	B	B	A	B	B	A	B	-	A	A	B	A	A	B	A	A	A	B	A	A	A	A	B	A	A	A	A
IWB6001	BS00005265_51	3B	79.2271	B	B	A	B	A	A	A	A	A	B	B	B	A	A	A	B	A	A	A	B	B	A	B	B	A	B	-	A	A	B	A	A	B	A	A	A	B	A	A	A	A	B	A	A	A	A
IWB71969	Tdurum_contig49477_548	3B	79.2271	B	B	A	B	A	A	A	A	A	B	B	B	A	A	A	B	A	A	A	B	B	A	B	B	A	B	A	A	A	B	A	A	B	A	A	A	B	A	A	A	A	B	A	A	A	A
IWB36652	Jagger_c5649_59	3B	79.2271	B	B	A	B	A	A	A	A	A	B	B	B	A	A	A	B	A	A	A	B	B	A	B	B	A	B	-	A	A	B	A	A	B	A	A	A	B	A	A	A	A	B	A	A	A	A
IWB71967	Tdurum_contig49477_187	3B	79.2271	B	B	A	B	A	A	A	A	A	B	B	B	A	A	A	B	A	A	A	B	B	A	B	B	A	B	-	A	A	B	A	A	B	A	A	A	B	A	A	A	A	B	A	A	A	A
IWB72934	Tdurum_contig63110_433	3B	79.2271	B	B	A	B	A	A	A	A	A	B	B	B	A	A	A	B	A	A	A	B	B	A	B	B	A	B	-	A	A	B	A	A	B	A	A	A	B	A	A	A	A	B	A	A	A	A
IWB73084	Tdurum_contig67750_272	3B	79.5743	B	B	A	B	A	A	A	A	A	B	B	B	A	A	A	B	A	A	A	B	B	A	B	B	A	B	-	A	A	B	A	A	B	A	A	A	B	A	A	A	A	B	A	A	A	A
IWA3304	wsnp_Ex_c3096_5708642	3B	79.5743	B	B	A	B	A	A	A	A	A	B	B	B	A	A	A	B	A	A	A	B	B	A	B	B	A	B	-	A	A	B	A	A	B	A	A	A	B	A	A	A	A	B	A	A	A	A
IWB35687	IACX11310	3B	79.5743	B	B	A	B	A	A	A	A	A	B	B	B	A	A	A	B	A	A	A	B	B	A	B	B	A	B	-	A	A	B	A	A	B	A	A	A	B	A	A	A	A	B	A	A	A	A
IWA3305	wsnp_Ex_c3096_5709257	3B	79.5743	B	B	A	B	A	A	A	A	A	B	B	B	A	A	A	B	A	A	A	B	B	A	B	B	A	B	-	A	A	B	A	A	B	A	A	A	B	A	A	A	A	B	A	A	A	A
IWB32599	GENE-1687_367	3B	79.5743	B	B	A	B	A	A	A	A	A	B	B	B	A	A	A	B	A	A	A	B	B	A	B	B	A	B	-	A	A	B	A	A	B	A	A	A	B	A	A	A	A	B	A	A	A	A
IWB72775	Tdurum_contig61288_745	3B	79.5743	B	B	A	B	A	A	A	A	A	B	B	B	A	A	A	B	A	A	A	B	B	A	B	B	A	B	-	A	A	B	A	A	B	A	A	A	B	A	A	A	A	B	A	A	A	A
IWA5775	wsnp_JD_c10602_11238420	3B	79.5743	B	B	A	B	A	A	A	A	A	B	B	B	A	A	A	B	A	A	A	B	B	A	B	B	A	B	-	A	A	B	A	A	B	A	A	A	B	A	A	A	A	B	A	A	A	A
IWB63403	RAC875_s108395_60	3B	82.1125	B	B	A	B	A	A	A	A	A	B	B	B	A	A	A	B	A	A	A	B	B	A	B	B	A	B	-	A	A	B	A	A	B	A	A	A	B	B	A	A	A	B	A	A	A	A
IWB53113	RAC875_c10595_473	3B	82.1125	B	B	A	B	A	A	A	A	A	B	B	B	A	A	A	B	A	A	A	B	B	A	B	B	A	B	-	A	A	B	A	A	B	A	A	A	B	B	A	A	A	B	A	A	A	A
IWB10364	BS00068816_51	3B	82.1125	B	B	A	B	A	A	A	A	A	B	B	B	A	A	A	B	A	A	A	B	B	A	B	B	A	B	-	A	A	B	A	A	B	A	A	A	B	-	A	A	A	B	A	A	A	A
IWB35816	IACX1932	3B	82.1125	B	B	A	B	A	A	A	A	A	B	B	B	A	A	A	B	A	A	A	B	B	A	B	B	A	B	-	A	A	B	A	A	B	A	A	A	B	-	A	A	A	B	A	A	A	A
IWA6104	wsnp_JD_c5643_6802088	3B	82.8218	B	B	A	B	A	A	A	A	A	B	A	B	A	A	A	B	A	A	A	B	B	A	B	B	A	B	-	A	A	B	A	A	B	A	A	A	B	-	A	A	A	B	A	A	A	A
IWA6105	wsnp_JD_c5643_6802211	3B	82.8218	B	B	A	B	A	A	A	A	A	B	A	B	A	A	A	B	A	A	A	B	B	A	B	B	A	B	-	A	A	B	A	A	B	A	A	A	B	-	A	A	A	B	A	A	A	A
IWB72547	Tdurum_contig57086_66	3B	83.1739	B	B	A	B	A	A	A	A	A	B	A	B	A	A	A	B	A	A	A	B	B	A	B	B	A	B	-	A	A	B	A	A	B	A	A	A	B	-	A	A	A	B	A	A	A	A
IWB71336	Tdurum_contig42711_1483	3B	83.1739	B	B	A	B	A	A	A	A	A	B	A	B	A	A	A	B	A	A	A	B	B	A	B	B	A	B	-	A	A	B	A	A	B	A	A	A	B	-	A	A	A	B	A	A	A	A
IWB71337	Tdurum_contig42711_1545	3B	83.1739	B	B	A	B	A	A	A	A	A	B	A	B	A	A	A	B	A	A	A	B	B	A	B	B	A	B	-	A	A	B	A	A	B	A	A	A	B	-	A	A	A	B	A	A	A	A
IWB73162	Tdurum_contig70056_255	3B	83.1739	B	B	A	B	A	A	A	A	A	B	A	B	A	A	A	B	A	A	A	B	B	A	B	B	A	B	-	A	A	B	A	A	B	A	A	A	B	-	A	A	A	B	A	A	A	A
IWB45792	Kukri_c47648_531	3B	83.1739	B	B	A	B	A	A	A	A	A	B	A	B	A	A	A	B	A	A	A	B	B	A	B	B	A	B	-	A	A	B	A	A	B	A	A	A	B	-	A	A	A	B	A	A	A	A
IWA1467	wsnp_Ex_c11313_18277285	3B	83.1739	B	B	A	B	A	A	A	A	A	B	A	B	A	A	A	B	A	A	A	B	B	A	B	B	A	B	-	A	A	B	A	A	B	A	A	A	B	-	A	A	A	B	A	A	A	A
IWA1468	wsnp_Ex_c11313_18277396	3B	83.1739	B	B	A	B	A	A	A	A	A	B	A	B	A	A	A	B	A	A	A	B	B	A	B	B	A	B	-	A	A	B	A	A	B	A	A	A	B	-	A	A	A	B	A	A	A	A
IWB11998	BS00097383_51	3B	84.2303	B	B	A	B	A	A	A	A	A	B	A	B	A	A	B	B	A	A	A	B	B	A	B	B	A	B	-	A	A	B	A	A	B	A	A	A	B	-	A	A	A	B	A	A	A	A
IWB23689	Excalibur_c21751_421	3B	93.2237	B	A	A	B	B	-	A	A	A	B	A	B	A	A	B	B	A	A	A	B	A	A	A	A	A	B	B	A	B	B	B	A	B	B	A	A	B	-	A	A	A	B	A	A	A	A
IWB7911	BS00032926_51	3B	93.2237	B	A	A	B	B	-	A	A	A	B	A	B	A	A	B	B	A	A	A	B	A	A	A	A	A	B	B	A	B	B	B	A	B	B	A	A	B	-	A	A	A	B	A	A	A	A
IWB9408	BS00064940_51	3B	93.2237	B	A	A	B	B	-	A	A	A	B	A	B	A	A	B	B	A	A	A	B	A	A	A	A	A	B	B	A	B	B	B	A	B	B	A	A	B	-	A	A	A	B	A	A	A	A
IWB11501	BS00087427_51	3B	93.2237	B	A	A	B	B	-	A	A	A	B	A	B	A	A	B	B	A	A	A	B	A	A	A	A	A	B	B	A	B	B	B	A	B	B	A	A	B	-	A	A	A	B	A	A	A	A
IWB9451	BS00065107_51	3B	93.2237	B	A	A	B	B	-	A	A	A	B	A	B	A	A	B	B	A	A	A	B	A	A	A	A	A	B	B	A	B	B	B	A	B	B	A	A	B	-	A	A	A	B	A	A	A	A
IWB54260	RAC875_c16281_195	3B	93.9484	B	A	B	B	B	-	A	A	A	B	A	B	A	A	B	B	A	A	A	B	A	A	A	A	A	B	B	A	B	B	B	A	B	B	A	A	B	-	A	A	A	B	A	A	A	A
IWA3244	wsnp_Ex_c29623_38630871	3B	93.9484	B	A	B	B	B	-	A	A	A	B	A	B	A	A	B	B	A	A	A	B	A	A	A	A	A	B	B	A	B	B	B	A	B	B	A	A	B	-	A	A	A	B	A	A	A	A
IWB7617	BS00026264_51	3B	95.4302	B	A	B	B	B	B	A	A	A	B	A	B	A	A	B	B	A	A	A	B	A	A	A	A	A	B	B	A	B	A	B	A	B	B	A	A	B	B	A	A	A	B	A	A	A	A
IWB27956	Excalibur_c60319_127	3B	103.91	B	A	B	B	B	B	B	B	A	B	A	B	A	A	B	A	B	A	A	B	A	B	A	A	A	B	B	A	B	B	B	A	B	B	A	A	B	B	B	A	A	B	B	A	A	A
IWA2167	wsnp_Ex_c1676_3185400	3B	103.91	B	A	B	B	B	B	B	B	A	B	A	B	A	A	B	A	B	A	A	B	A	B	A	A	A	B	B	A	B	B	B	A	B	B	A	A	B	B	B	A	A	B	B	A	A	A
IWB57606	RAC875_c403_2247	3B	107.224	B	A	B	B	B	B	B	B	A	B	A	B	A	A	B	A	B	A	A	B	A	B	A	A	A	B	A	A	B	B	B	A	B	B	A	A	A	A	B	A	A	B	B	A	A	A
IWB10748	BS00074614_51	4A	0	B	A	B	A	B	-	B	B	A	B	B	-	A	B	A	A	B	A	A	B	A	A	A	A	A	B	A	B	A	A	B	A	A	B	A	A	A	B	B	B	A	B	B	A	-	A
IWB8337	BS00043286_51	4A	9.5142	A	A	B	A	B	B	B	A	A	B	B	A	B	B	A	A	A	A	A	B	A	A	A	A	B	B	A	B	A	B	B	A	A	-	A	A	A	B	B	B	A	B	B	A	A	A
IWB72664	Tdurum_contig59603_74	4A	9.5142	A	A	B	A	B	B	B	A	A	B	B	A	B	B	A	A	A	A	A	B	A	A	A	A	B	B	A	B	A	B	B	A	A	-	A	A	A	B	B	B	A	B	B	A	A	A
IWB68749	Tdurum_contig1868_249	4A	11.7544	A	A	B	A	B	-	-	A	A	A	B	A	B	B	A	A	A	A	A	B	A	A	A	A	B	B	B	A	A	B	B	A	A	A	A	A	A	B	B	B	A	B	B	A	A	A
IWA54	wsnp_BE405275A_Ta_1_1	4A	11.7544	A	A	B	A	B	-	-	A	A	A	B	-	B	B	A	A	A	A	A	B	A	A	A	A	B	B	B	A	A	B	B	A	A	A	A	A	A	B	B	B	A	B	B	A	A	A
IWB52625	Ra_c74035_586	4A	13.6491	A	A	B	A	B	B	B	B	A	A	B	A	B	B	A	A	A	A	A	B	A	A	A	A	B	B	B	A	A	B	B	A	A	A	A	A	A	B	B	B	A	B	B	A	A	A
IWB72314	Tdurum_contig53373_192	4A	13.6491	A	A	B	A	B	B	B	B	A	A	B	A	B	B	A	A	A	A	A	B	A	A	A	A	B	B	B	A	A	B	B	A	A	A	A	A	A	B	B	B	A	B	B	A	A	A
IWB73476	Tdurum_contig8061_56	4A	24.0414	A	A	A	A	B	B	B	B	A	A	B	A	A	B	A	A	A	A	A	B	A	B	A	A	B	B	B	B	A	B	A	A	B	A	A	B	A	A	B	B	A	B	B	A	B	A
IWB59410	RAC875_c58868_397	4A	25.0905	A	A	A	A	B	B	B	B	A	A	B	A	A	B	A	A	A	A	A	B	A	B	A	A	B	B	B	B	A	B	A	A	B	A	A	B	A	A	B	B	A	B	B	A	B	-
IWB26155	Excalibur_c40618_182	4A	26.1322	A	A	A	A	B	B	B	B	A	A	B	A	A	B	A	A	A	A	A	B	A	B	A	A	B	B	B	B	A	B	A	A	B	A	A	B	A	A	B	B	A	B	B	A	B	-
IWB67355	Tdurum_contig11919_360	4A	26.1322	A	A	A	A	B	B	B	B	A	A	B	A	A	B	A	A	A	A	A	B	A	B	A	A	B	B	B	B	A	B	A	A	B	A	A	B	A	A	B	B	A	B	B	A	B	-
IWB70442	Tdurum_contig33628_129	4A	26.1322	A	A	A	A	B	B	B	B	A	A	B	A	A	B	A	A	A	A	A	B	A	B	A	A	B	B	B	B	A	B	A	A	B	A	A	B	A	A	B	B	A	B	B	A	B	A
IWB11606	BS00089283_51	4A	26.1322	A	A	A	A	B	B	B	B	A	A	B	A	A	B	A	A	A	-	A	B	A	B	A	A	B	B	B	B	A	B	A	A	B	A	A	B	A	A	B	B	A	B	B	A	B	A
IWB21625	Excalibur_c10390_104	4A	45.6342	B	A	B	A	A	B	B	B	A	A	A	B	A	B	A	B	B	B	A	B	A	A	A	A	B	B	B	A	A	B	A	A	B	A	A	B	A	A	A	A	A	B	B	A	B	B
IWA6702	wsnp_Ku_c2114_4088504	4A	45.6342	B	A	B	A	A	B	B	B	A	A	A	B	A	B	A	B	B	B	A	B	A	A	A	A	B	B	B	A	A	B	A	A	B	A	A	B	A	A	A	A	A	B	B	A	B	B
IWB50863	Ra_c108749_837	4A	45.6342	B	A	B	A	A	B	B	B	A	A	A	B	A	B	A	B	B	B	A	B	A	A	A	A	B	B	B	A	A	B	A	A	B	A	A	B	A	A	A	A	A	B	B	A	B	B
IWA5236	wsnp_Ex_rep_c66426_64644630	4A	45.6342	B	A	B	A	A	B	B	B	A	A	A	B	A	B	A	B	B	B	A	B	A	A	A	A	B	B	B	A	A	B	A	A	B	A	A	B	A	A	A	A	A	B	B	A	B	B
IWB43069	Kukri_c25072_508	4A	52.8258	B	A	B	A	A	B	B	B	A	A	A	B	A	A	A	A	B	-	A	B	A	A	B	B	B	B	B	A	A	A	A	A	B	B	A	B	A	A	A	A	A	B	B	A	A	A
IWA8416	wsnp_RFL_Contig3024_2910610	4A	52.8258	B	A	B	A	A	B	B	B	A	A	A	B	A	A	A	A	B	-	A	B	A	A	B	B	B	B	B	A	A	A	A	A	B	B	A	B	A	A	A	A	A	B	B	A	A	A
IWA6443	wsnp_Ku_c11945_19406789	4A	54.286	B	B	B	A	A	B	B	B	A	A	A	B	A	A	A	A	B	-	A	B	A	A	B	B	B	B	B	A	A	A	A	A	A	B	A	B	A	A	A	A	A	B	B	A	A	A
IWB51756	Ra_c30013_483	4A	54.9853	B	B	B	A	A	B	B	B	A	A	A	B	A	A	A	A	B	-	A	B	A	A	B	B	B	B	B	A	A	A	A	A	A	B	A	B	A	A	A	A	A	B	B	A	A	A
IWB34384	IAAV1461	4A	55.3301	B	B	B	A	A	B	B	B	A	A	A	B	A	A	A	A	B	-	A	B	A	A	B	B	B	B	B	A	A	A	A	A	A	B	A	B	A	A	A	A	A	B	B	A	A	A
IWA7107	wsnp_Ku_c48043_54334230	4A	55.3301	B	B	B	A	A	B	B	B	A	A	A	B	A	A	A	A	B	-	A	B	A	A	B	B	B	B	B	A	A	A	A	A	A	B	A	B	A	A	A	A	A	B	B	A	A	A
IWB58994	RAC875_c5394_1052	4A	55.3301	B	B	B	A	A	B	B	B	A	A	A	B	A	A	A	A	B	-	A	B	A	A	B	B	B	B	B	A	A	A	A	A	A	B	A	B	A	A	A	A	A	B	B	A	A	A
IWA4768	wsnp_Ex_c8092_13695482	4A	55.3301	B	B	B	A	A	B	B	B	A	A	A	B	A	A	A	A	B	-	A	B	A	A	B	B	B	B	B	A	A	A	A	A	A	B	A	B	A	A	A	A	A	B	B	A	A	A
IWA4253	wsnp_Ex_c5492_9691241	4A	55.3301	B	B	B	A	A	B	B	B	A	A	A	B	A	A	A	A	B	-	A	B	A	A	B	B	B	B	B	A	A	A	A	A	A	B	A	B	A	A	A	A	A	B	B	A	A	A
IWA4254	wsnp_Ex_c5492_9691880	4A	55.3301	B	B	B	A	A	-	B	B	A	A	A	B	A	A	A	A	B	-	A	B	A	A	B	B	B	B	B	A	A	A	A	A	A	B	A	B	A	A	A	A	A	B	B	A	A	A
IWA1804	wsnp_Ex_c1373_2628597	4A	59.413	B	B	B	A	A	B	B	B	A	A	A	B	A	B	A	A	B	-	B	B	A	A	B	B	B	A	B	A	A	A	A	A	A	B	A	B	A	A	A	A	A	B	B	A	A	A
IWB6937	BS00022160_51	4A	60.4621	B	B	B	A	A	B	B	B	A	A	A	B	A	B	A	A	B	-	B	A	A	A	B	B	B	A	B	A	A	A	A	A	A	B	A	B	A	A	A	A	A	B	B	A	A	A
IWB33175	GENE-3043_289	4A	61.861	B	B	B	A	A	B	B	B	B	A	A	B	A	B	A	A	B	B	B	A	A	A	B	B	B	A	B	A	A	A	A	A	A	B	A	B	A	B	A	A	A	B	B	A	A	A
IWB33174	GENE-3043_279	4A	61.861	B	B	B	A	A	B	B	B	B	A	A	B	A	B	A	A	B	B	B	A	A	A	B	B	B	A	B	A	A	A	A	A	A	B	A	B	A	B	A	A	A	B	B	A	A	A
IWB6208	BS00010339_51	4A	65.9745	B	B	B	A	B	B	B	B	B	A	A	B	A	B	A	B	B	B	B	A	A	A	B	B	B	A	B	A	A	A	B	A	A	B	A	B	A	B	A	A	A	B	B	A	B	A
IWB36333	IACX8919	4A	65.9745	B	B	B	A	B	B	B	B	B	A	A	B	A	B	A	B	B	B	B	A	A	A	B	B	B	A	B	A	A	A	B	A	A	B	A	B	A	B	A	A	A	B	B	A	B	A
IWB20891	Ex_c53906_571	4A	65.9745	B	B	B	A	B	B	B	B	B	A	A	B	A	B	A	B	B	B	B	A	A	A	B	B	B	A	B	A	A	A	B	A	A	B	A	B	A	B	A	A	A	B	B	A	B	A
IWA101	wsnp_BE442666A_Ta_2_1	4A	66.6641	B	B	B	A	B	B	B	B	B	A	A	B	A	B	A	B	B	B	B	A	A	A	B	B	B	A	B	A	A	A	B	A	A	B	A	B	A	B	A	A	A	B	B	A	B	A
IWB43375	Kukri_c2706_1424	4A	78.5184	B	B	B	A	B	B	B	B	B	A	B	A	A	B	A	B	A	B	B	A	A	A	B	B	B	A	B	A	B	A	B	B	B	B	B	B	A	B	A	A	A	A	B	A	B	A
IWB11778	BS00092859_51	4A	79.2177	B	B	B	A	B	B	B	B	B	A	B	A	A	B	A	B	A	B	B	A	A	A	B	B	B	A	B	A	B	A	B	B	B	B	B	B	A	B	A	A	A	A	B	A	B	A
IWB12303	BS00107097_51	4A	79.2177	B	B	B	A	B	B	B	B	B	A	B	A	A	B	A	B	A	B	B	A	A	A	B	B	B	A	B	A	B	A	B	B	B	B	B	B	A	B	A	A	A	A	B	A	B	A
IWB12329	BS00107766_51	4A	79.2177	B	B	B	A	B	B	B	B	B	A	B	A	A	B	A	B	A	B	B	A	A	A	B	B	B	A	B	A	B	A	B	B	B	B	B	B	A	B	A	A	A	A	B	A	B	A
IWA1720	wsnp_Ex_c13031_20625900	4A	90.9309	B	B	B	B	B	B	B	B	B	A	B	A	B	B	A	B	A	B	B	A	A	A	B	B	-	A	B	-	B	A	B	B	B	B	B	B	B	B	A	B	A	A	A	A	B	A
IWB71770	Tdurum_contig47148_651	4A	95.2046	B	B	B	B	B	B	B	B	B	A	B	A	B	B	B	B	A	B	B	A	A	A	B	B	-	A	B	-	B	A	B	B	B	B	B	B	B	B	A	B	A	A	A	A	B	A
IWB72783	Tdurum_contig61343_177	4A	97.0572	B	B	B	B	B	B	B	B	B	-	B	A	B	B	B	B	A	B	B	A	A	A	B	B	-	A	A	-	B	A	-	B	B	B	B	B	B	B	A	B	B	A	A	A	B	A
IWB2776	BobWhite_c35402_66	4A	97.0572	B	B	B	B	B	B	B	B	B	A	B	A	B	B	B	B	A	B	B	A	A	A	B	B	-	A	A	-	B	A	-	B	B	B	B	B	B	B	A	B	B	A	A	A	B	A
IWB64452	RFL_Contig3679_315	4A	97.0572	B	B	B	B	B	B	B	B	B	A	B	A	B	B	B	B	A	B	B	A	A	A	B	B	A	A	A	-	B	A	B	B	B	B	B	B	B	B	A	B	B	A	A	A	B	A
IWB24962	Excalibur_c30378_673	4A	97.4044	B	B	B	B	B	B	B	B	B	A	B	A	B	B	B	B	A	B	B	A	A	A	B	B	A	A	A	-	B	A	B	B	B	B	B	B	B	B	A	B	B	A	A	A	B	A
IWB37469	JD_c4438_839	4A	105.255	A	B	B	B	B	B	B	B	-	A	B	A	B	B	B	B	B	A	B	A	A	A	A	A	B	A	A	B	B	A	B	B	B	B	B	B	B	B	A	A	B	A	B	A	B	A
IWB42242	Kukri_c20012_1362	4A	110.35	A	B	B	B	B	B	B	B	B	A	B	A	B	B	B	B	B	A	B	A	B	A	A	A	B	A	A	B	B	A	B	B	A	B	B	B	B	B	A	A	B	A	B	A	B	A
IWB29438	Excalibur_c9370_966	4A	114.526	A	B	B	B	B	B	B	B	B	B	B	A	B	B	B	B	B	B	B	A	B	A	A	A	B	A	A	B	B	A	B	A	A	B	B	B	B	B	A	A	B	A	B	A	B	A
IWB8782	BS00059503_51	4A	116.338	A	B	B	B	B	B	B	B	-	B	B	A	B	B	B	B	B	B	B	A	B	A	A	A	B	A	A	B	B	B	B	A	A	B	B	B	B	A	A	A	B	A	B	A	B	A
IWB8154	BS00039147_51	4A	118.562	A	B	B	B	B	B	B	B	-	B	B	A	B	B	B	B	B	B	B	A	B	A	A	A	B	A	A	B	B	B	B	A	A	B	B	B	B	A	A	A	B	A	B	A	B	A
IWB8155	BS00039148_51	4A	118.562	A	B	B	B	B	B	B	B	-	B	B	A	B	B	B	B	B	B	B	A	B	A	A	A	B	A	A	B	B	B	B	A	A	B	B	B	B	A	A	A	B	A	B	A	B	A
IWB44902	Kukri_c39261_561	4A	125.049	A	B	B	B	B	-	B	B	B	B	B	A	A	-	B	B	A	B	B	A	B	A	A	A	B	A	A	B	A	B	B	A	A	B	B	B	B	A	A	B	A	A	B	A	B	A
IWB14501	CAP8_c1180_342	4A	125.049	A	B	B	B	B	B	B	B	B	B	B	A	A	-	B	B	A	B	B	A	B	A	A	A	B	A	A	B	A	B	B	A	A	B	B	B	B	A	A	B	A	A	B	A	B	A
IWB74847	tplb0046a02_804	4A	127.289	A	B	B	B	B	B	B	B	B	B	B	A	A	-	B	B	A	B	B	A	B	A	A	A	B	A	A	B	A	B	B	A	A	B	B	B	-	A	A	B	A	A	B	A	B	A
IWB26481	Excalibur_c4370_1451	4A	128.393	A	B	B	B	B	B	B	B	B	B	B	B	A	B	B	B	A	B	B	A	B	A	A	A	B	A	A	B	A	B	B	A	A	B	B	B	-	A	A	B	A	A	B	A	B	A
IWA5968	wsnp_JD_c27162_22206547	4A	128.752	A	B	B	B	B	B	B	B	B	B	B	B	A	B	B	B	A	B	B	A	B	A	A	A	B	A	A	B	A	B	B	A	A	A	B	B	-	A	A	B	A	A	B	A	B	A
IWB9891	BS00066809_51	4A	129.461	A	B	B	B	B	B	B	B	B	B	B	B	A	B	B	B	A	B	B	A	B	A	A	A	B	A	A	B	A	B	B	A	A	A	B	B	-	A	A	B	A	A	B	A	B	A
IWB18371	D_GBF1XID01C0IF4_111	4A	129.461	A	B	B	B	B	B	B	B	B	B	B	B	A	B	B	B	A	B	B	A	B	A	A	A	B	A	A	B	A	B	B	A	A	A	B	B	-	A	A	B	A	A	B	A	B	A
IWB12180	BS00101512_51	4A	129.461	A	B	B	B	B	B	B	B	B	-	B	B	A	B	B	B	A	B	B	A	B	A	A	A	B	A	A	B	A	B	B	A	A	A	B	B	-	A	A	B	A	A	B	A	B	A
IWB28552	Excalibur_c7034_692	4A	129.461	A	B	B	B	B	B	B	B	B	B	B	B	A	B	B	B	A	B	B	A	B	A	A	A	B	A	A	B	A	B	B	A	A	A	B	B	-	A	A	B	A	A	B	A	B	A
IWB60738	RAC875_c83401_115	4A	132.428	A	B	B	B	B	B	B	B	B	B	B	B	A	B	B	B	A	B	B	A	B	A	B	B	B	A	A	B	A	B	B	A	A	A	B	B	-	A	A	B	B	A	B	A	B	A
IWB66086	TA006348-0950	4A	133.877	A	B	B	B	-	B	B	B	B	B	B	B	A	B	B	B	A	B	B	A	B	A	B	B	B	-	A	B	A	B	B	A	A	A	B	B	-	A	B	B	B	A	B	A	B	B
IWB1080	BobWhite_c17731_247	4A	138.389	A	B	B	A	A	A	A	A	B	-	B	B	A	B	B	B	A	B	B	A	B	A	B	B	B	-	A	B	A	B	B	A	A	A	B	B	B	A	B	B	A	A	B	B	B	B
IWB51215	Ra_c16330_1160	4A	138.389	A	B	B	A	A	-	-	-	B	B	B	B	-	B	B	B	-	B	B	A	B	-	B	B	B	-	-	B	-	B	B	-	A	A	B	B	B	-	B	B	A	A	B	B	B	B
IWB50550	Kukri_rep_c96828_86	4A	140.613	A	B	B	A	A	A	A	A	B	B	B	B	A	B	B	B	A	B	B	B	B	A	B	B	B	-	A	B	A	B	B	A	A	A	B	B	B	A	B	B	A	A	B	B	B	B
IWB6821	BS00021957_51	4A	141.302	A	B	B	A	A	A	A	A	A	B	B	B	A	B	B	B	A	B	B	B	B	A	B	B	B	-	A	B	A	B	B	A	A	A	B	B	B	A	B	B	A	A	B	B	B	B
IWA559	wsnp_BG313770B_Ta_1_3	4A	145.385	A	B	B	A	A	B	B	B	A	B	B	B	A	B	B	B	A	B	B	B	B	A	B	B	B	-	A	B	A	B	B	A	A	A	B	B	B	A	B	B	A	B	B	B	B	B
IWB8184	BS00039641_51	4A	147.545	A	B	B	A	A	B	B	B	A	B	B	B	A	B	B	B	A	B	B	B	B	A	B	B	B	-	A	A	A	B	B	A	A	A	B	B	B	A	B	A	A	B	B	B	B	B
IWB11380	BS00084703_51	4A	148.259	A	B	B	A	A	B	B	B	A	B	B	B	A	B	B	B	A	B	B	B	B	A	B	B	B	-	A	A	A	B	B	A	A	A	B	B	B	A	B	A	A	B	B	B	B	B
IWB51337	Ra_c1897_2401	4A	148.259	A	B	B	A	A	B	B	B	A	B	B	B	A	B	B	B	A	B	B	B	B	A	B	B	B	-	A	A	A	B	B	A	A	A	B	B	B	A	B	A	A	B	B	B	B	B
IWB34144	GENE-4750_495	4A	148.259	A	B	B	A	A	B	B	B	A	B	B	B	A	B	B	B	A	B	B	B	B	A	B	B	B	-	A	A	A	B	B	A	A	A	B	B	B	A	B	A	A	B	B	B	B	B
IWB8193	BS00039811_51	4A	150.854	A	B	B	A	A	B	B	B	A	B	B	B	A	B	B	A	A	B	B	B	B	A	B	B	B	-	A	A	A	B	B	A	A	A	B	B	B	A	B	A	A	B	B	A	B	B
IWB11801	BS00093289_51	4A	150.854	A	B	B	A	A	B	B	B	A	B	B	B	A	B	B	A	A	B	B	B	B	A	B	B	B	-	A	A	A	B	B	A	A	A	B	B	B	A	B	A	A	B	B	A	B	B
IWB70620	Tdurum_contig39549_245	4A	151.918	A	B	B	A	A	B	B	B	A	B	B	B	A	B	B	A	A	B	B	B	B	A	B	B	B	-	A	A	A	B	B	A	A	A	B	B	B	A	B	A	A	B	B	A	B	B
IWB25400	Excalibur_c33995_302	4A	152.27	A	B	B	A	A	B	B	B	A	B	B	B	A	B	B	A	A	B	B	B	B	A	B	B	B	-	A	A	A	B	B	A	A	A	B	B	B	A	B	A	A	B	B	A	B	B
IWB54755	RAC875_c1899_1089	4A	152.27	A	B	B	A	A	B	B	B	A	-	B	B	-	B	B	A	A	B	B	B	B	-	B	B	B	B	A	A	A	B	B	A	A	A	B	B	B	-	B	A	A	B	B	A	B	B
IWB72220	Tdurum_contig51959_1408	4A	152.27	A	B	B	A	A	B	B	B	A	B	B	B	A	B	B	A	A	B	B	B	B	A	B	B	B	-	A	A	A	B	B	A	A	A	B	B	B	A	B	A	A	B	B	A	B	B
IWB8842	BS00061710_51	4A	152.979	A	B	B	A	A	B	B	B	A	B	B	B	A	B	B	A	A	B	B	B	B	A	B	B	B	-	A	A	A	B	B	B	A	A	B	B	B	A	B	A	A	B	B	A	B	B
IWB66653	Tdurum_contig10654_375	4A	152.979	A	B	B	A	A	B	B	B	A	B	B	B	A	B	B	A	A	B	B	B	B	A	B	B	B	-	A	A	A	B	B	B	A	A	B	B	B	A	B	A	A	B	B	A	B	B
IWB36777	Jagger_c8310_70	4A	152.979	A	B	B	A	A	B	B	B	A	B	B	B	A	B	B	A	A	B	B	B	B	A	B	B	B	-	A	A	A	B	B	B	A	A	B	B	B	A	B	A	A	B	B	A	B	B
IWB69385	Tdurum_contig27944_266	4A	152.979	A	B	B	A	A	B	B	B	A	B	B	B	A	B	B	A	A	B	B	B	B	A	B	B	B	-	A	A	A	B	B	B	A	A	B	B	B	A	B	A	A	B	B	A	B	B
IWB1407	BobWhite_c20558_413	4A	153.683	A	B	B	A	A	B	B	B	A	B	B	B	A	B	B	A	A	B	B	B	B	A	B	B	B	A	A	A	A	A	B	B	A	A	B	B	B	A	B	A	A	B	B	A	B	B
IWB11370	BS00084514_51	4A	155.102	A	B	B	A	A	B	B	B	A	B	B	B	A	B	B	A	A	B	B	B	B	A	B	B	B	A	A	A	A	A	B	B	A	A	B	B	B	B	B	A	A	B	B	A	B	B
IWB71694	Tdurum_contig46583_1378	4A	155.102	A	B	B	A	A	B	B	B	A	B	B	B	A	B	B	A	A	B	B	B	B	A	B	B	B	A	A	A	A	A	B	B	A	A	B	B	B	B	B	A	A	B	B	A	B	B
IWB73932	Tdurum_contig9530_103	4A	157.678	A	B	B	A	A	-	B	B	A	B	B	B	A	A	B	A	A	B	B	B	B	A	B	B	B	A	A	A	A	A	B	B	A	A	B	B	B	B	B	A	A	B	B	A	B	A
IWB70193	Tdurum_contig31218_279	4A	157.678	A	B	B	A	A	B	B	B	A	B	B	B	A	A	B	A	A	B	B	B	B	A	B	B	B	A	A	A	A	A	B	B	A	A	B	B	B	B	B	A	A	B	B	A	B	A
IWB70192	Tdurum_contig31218_208	4A	157.678	A	B	B	A	A	B	B	B	A	B	B	B	A	A	B	A	A	B	B	B	B	A	B	B	B	A	A	A	A	A	B	B	A	A	B	B	B	B	B	A	A	B	B	A	B	A
IWA4859	wsnp_Ex_c8976_14964359	4A	158.043	A	B	B	A	A	-	B	B	A	B	B	B	A	A	B	A	A	-	B	B	B	A	B	B	B	A	A	A	A	A	B	B	A	A	B	B	B	B	B	A	A	B	B	A	B	A
IWB8207	BS00040127_51	4B	0	B	A	A	B	A	B	B	B	A	B	B	A	A	B	B	B	B	A	B	B	B	A	A	A	B	B	A	A	B	A	A	B	A	B	B	B	A	A	B	A	A	B	A	A	A	A
IWB10565	BS00071658_51	4B	0.367634	B	A	A	B	A	B	B	B	A	B	B	A	A	B	B	B	B	A	B	B	B	A	A	A	B	B	A	A	B	A	A	B	A	B	B	B	A	A	B	A	A	B	A	A	A	A
IWB72348	Tdurum_contig5427_314	4B	10.8793	B	B	B	B	-	B	B	B	A	B	B	B	B	B	B	A	B	A	B	A	B	A	A	A	A	B	A	A	A	A	A	B	B	B	B	B	A	A	A	A	A	B	A	A	A	A
IWB74228	tplb0025f09_973	4B	10.8793	B	B	B	B	-	B	B	B	A	B	B	B	B	B	B	A	B	A	B	A	B	A	A	A	A	B	A	A	A	A	A	B	B	B	B	B	A	A	A	A	A	B	A	A	A	A
IWB12274	BS00106142_51	4B	10.8793	B	B	B	B	B	B	B	B	A	B	B	B	B	B	B	A	B	A	B	A	B	A	A	A	A	B	A	A	A	A	A	B	B	B	B	B	A	A	A	A	A	B	A	A	A	A
IWB34965	IAAV5038	4B	11.2443	A	B	B	B	B	B	B	B	A	B	B	B	B	B	B	A	B	A	B	A	B	A	A	A	A	B	A	A	A	A	A	B	B	B	B	B	A	A	A	A	A	B	A	A	A	A
IWB47977	Kukri_c8386_767	4B	11.9905	A	B	B	B	B	B	B	B	A	B	B	B	B	B	-	A	A	A	B	A	B	A	A	A	A	B	B	A	A	A	A	B	B	B	B	B	A	A	A	A	A	B	A	A	A	A
IWB66459	Tdurum_contig10322_1908	4B	16.7666	B	B	B	B	B	B	B	B	A	B	B	B	B	B	-	A	A	A	B	A	B	A	B	B	B	B	B	A	B	A	A	B	B	B	B	B	A	A	A	A	A	B	A	A	A	A
IWB73893	Tdurum_contig93710_409	4B	17.8459	B	B	B	B	B	B	B	B	A	B	B	B	B	B	-	A	A	A	B	A	B	A	B	B	B	B	B	A	B	A	-	B	B	B	B	B	A	A	A	A	A	B	A	A	A	A
IWA1316	wsnp_Ex_c10347_16946522	4B	17.8459	B	B	B	B	B	B	B	B	A	B	B	B	B	B	-	A	A	A	B	A	B	A	B	B	B	B	B	A	B	A	-	B	B	B	B	B	A	A	A	A	A	B	A	A	A	A
IWA7268	wsnp_Ku_c7180_12403155	4B	17.8459	B	B	B	B	B	B	B	B	A	B	B	B	B	B	-	A	A	A	B	A	B	A	B	B	B	B	B	A	B	A	-	B	B	B	B	B	A	A	A	A	A	B	A	A	A	A
IWB8084	BS00037094_51	4B	17.8459	B	B	B	B	B	B	B	B	A	B	B	B	B	B	-	A	A	A	B	A	B	A	B	B	B	B	B	A	B	A	-	B	B	B	B	B	A	A	A	A	A	B	A	A	A	A
IWB71830	Tdurum_contig47622_234	4B	17.8459	B	B	B	B	B	B	B	B	A	B	B	B	B	B	-	A	A	A	B	A	B	A	B	B	B	B	B	A	B	A	-	B	B	B	B	B	A	A	A	A	A	B	A	A	A	A
IWB73063	Tdurum_contig67399_676	4B	18.1955	B	B	B	B	B	B	B	B	A	B	B	B	B	B	-	A	A	A	B	A	B	A	B	B	B	B	B	A	B	A	-	B	B	B	B	B	A	A	A	A	A	B	A	A	A	A
IWB2333	BobWhite_c30050_125	4B	21.6893	B	B	B	B	B	B	B	B	A	B	B	B	B	B	-	A	A	A	B	A	B	A	B	B	B	B	B	A	B	A	-	B	B	B	A	A	B	A	A	A	A	B	A	A	A	A
IWB47849	Kukri_c80544_61	4B	21.6893	B	B	B	B	B	B	B	B	A	B	B	B	B	B	-	A	A	A	B	A	B	A	B	B	B	B	B	A	B	A	-	B	B	B	A	A	B	A	A	A	A	B	A	A	A	A
IWB73117	Tdurum_contig68677_480	4B	21.6893	B	B	B	B	B	B	B	B	A	B	B	B	B	B	-	A	A	A	B	A	B	A	B	B	B	B	B	A	B	A	-	B	B	B	A	A	B	A	A	A	A	B	A	A	A	A
IWB6297	BS00010830_51	4B	26.1362	B	B	B	B	B	B	B	B	A	A	B	B	B	B	-	B	A	A	B	A	B	A	B	B	A	B	B	A	B	A	B	B	B	-	A	A	B	A	A	A	B	B	A	A	A	A
IWB72442	Tdurum_contig55414_154	4B	26.1362	B	B	B	B	B	B	B	B	A	A	B	B	B	B	-	B	A	A	B	A	B	A	B	B	A	B	B	A	B	A	B	B	B	-	A	A	B	A	A	A	B	B	A	A	A	A
IWB70674	Tdurum_contig41902_730	4B	27.2233	B	B	B	B	B	B	B	B	A	A	B	B	B	B	-	B	A	A	B	A	B	A	B	B	A	B	B	A	B	A	B	B	B	-	A	A	B	A	A	A	B	B	A	A	A	A
IWB73001	Tdurum_contig64772_417	4B	28.3183	B	B	-	B	B	B	B	B	A	A	B	B	B	B	-	B	A	A	B	A	B	A	B	B	A	B	B	A	B	A	B	B	B	-	A	A	B	A	A	A	B	B	A	A	A	A
IWB73540	Tdurum_contig81905_502	4B	30.9325	B	B	A	B	B	B	B	B	A	A	B	B	B	B	-	B	A	A	B	A	B	A	B	B	A	B	B	A	B	A	B	B	B	-	A	A	B	A	A	A	B	B	A	A	A	B
IWB6839	BS00021984_51	4B	34.816	B	B	B	B	A	B	B	B	A	-	B	B	B	B	-	B	A	A	B	A	B	A	B	B	A	B	B	A	B	A	B	B	B	-	A	B	B	A	A	A	B	B	A	A	A	B
IWB73561	Tdurum_contig82364_132	4B	34.816	B	B	B	B	-	B	B	B	A	-	B	B	B	B	-	B	A	A	B	A	B	A	B	B	A	B	B	A	B	A	B	B	B	-	A	B	B	A	A	A	B	B	A	A	A	B
IWB73831	Tdurum_contig92931_787	4B	34.816	B	B	B	B	-	B	B	B	A	A	B	B	B	B	-	B	A	A	B	A	B	A	B	B	A	B	B	A	B	A	B	B	B	-	A	B	B	A	A	A	B	B	A	A	A	B
IWB7934	BS00033614_51	4B	35.1757	B	B	B	B	-	B	B	B	A	A	B	B	B	B	-	B	A	A	B	A	B	A	B	B	A	B	B	A	B	A	B	B	B	-	A	B	B	A	A	A	B	B	A	A	A	B
IWB7491	BS00023431_51	4B	43.0259	B	B	A	B	-	B	B	B	A	A	B	B	B	B	-	B	A	A	B	B	B	A	B	B	A	B	B	A	B	B	A	B	B	-	A	B	B	A	A	A	B	B	A	A	A	B
IWB71836	Tdurum_contig47706_190	4B	43.7402	B	B	A	B	-	B	B	B	A	A	B	B	B	B	-	B	A	A	B	B	B	A	B	B	A	B	B	A	B	B	A	B	B	-	A	B	B	A	A	A	B	B	A	A	A	B
IWB71676	Tdurum_contig46368_742	4B	45.1898	B	B	A	B	-	B	B	B	A	A	B	B	B	B	-	B	A	A	B	B	B	A	B	B	A	B	B	A	B	B	A	B	B	-	A	B	B	A	A	A	B	B	A	A	A	B
IWB32939	GENE-2462_1056	4B	45.1898	B	B	A	B	-	B	B	B	A	A	B	B	B	B	-	B	A	A	B	B	B	A	B	B	A	B	B	A	B	B	A	B	B	-	A	B	B	A	A	A	B	B	A	A	A	B
IWB66164	Tdurum_contig100205_499	4B	45.9041	B	B	A	B	-	B	B	B	A	A	B	B	B	B	-	B	A	A	B	B	B	A	B	B	A	B	B	A	B	B	A	B	B	-	A	B	B	A	A	A	B	B	A	A	A	B
IWB73915	Tdurum_contig94552_326	4B	45.9041	B	B	A	B	-	B	B	B	A	A	B	B	B	B	-	B	A	A	B	B	B	A	B	B	A	B	B	A	B	B	A	B	B	-	A	B	B	A	A	A	B	B	A	A	A	B
IWB67887	Tdurum_contig13165_767	4B	45.9041	B	B	A	B	-	B	B	B	A	A	B	B	B	B	-	B	A	A	B	B	B	A	B	B	A	B	B	A	B	B	A	B	B	-	A	B	B	A	A	A	B	B	A	A	A	B
IWB72008	Tdurum_contig4974_3193	4B	47.3433	B	B	A	B	-	B	B	B	B	A	B	B	B	B	A	B	A	A	B	A	B	A	B	B	A	B	B	A	B	B	A	B	B	-	A	B	B	A	A	A	B	B	A	A	A	B
IWB72010	Tdurum_contig4974_486	4B	47.3433	B	B	A	B	-	B	B	B	B	A	B	B	B	B	A	B	A	A	B	A	B	A	B	B	A	B	B	A	B	B	A	B	B	-	A	B	B	A	A	A	B	B	A	A	A	B
IWB72009	Tdurum_contig4974_355	4B	47.3433	B	B	A	B	-	B	B	B	B	A	B	B	B	B	A	B	A	A	B	A	B	A	B	B	A	B	B	A	B	B	A	B	B	-	A	B	B	A	A	A	B	B	A	A	A	B
IWB72007	Tdurum_contig4974_243	4B	47.3433	B	B	A	B	-	B	B	B	B	A	B	B	B	B	A	B	A	A	B	A	B	A	B	B	A	B	B	A	B	B	A	B	B	-	A	B	B	A	A	A	B	B	A	A	A	B
IWB70202	Tdurum_contig31250_273	4B	48.0525	B	B	A	B	-	B	B	B	B	A	B	B	B	B	A	B	A	A	B	A	B	A	B	B	A	B	B	A	B	B	A	B	B	-	A	B	B	A	A	A	B	B	A	A	A	B
IWB10265	BS00068242_51	4B	48.0525	B	B	A	B	-	B	B	B	B	A	B	B	B	B	A	B	A	A	B	A	B	A	B	B	A	B	B	A	B	B	A	B	B	-	A	B	B	A	A	A	B	B	A	A	A	B
IWB72885	Tdurum_contig62310_490	4B	48.0525	B	B	A	B	-	B	B	B	B	A	B	B	B	B	A	B	A	A	B	A	B	A	B	B	A	B	B	A	B	B	A	B	B	-	A	B	B	A	A	A	B	B	A	A	A	B
IWB70250	Tdurum_contig31451_173	4B	48.0525	B	B	A	B	-	B	B	B	B	A	B	B	B	B	A	B	A	A	B	A	B	A	B	B	A	B	B	A	B	B	A	B	B	-	A	B	B	A	A	A	B	B	A	A	A	B
IWB67738	Tdurum_contig12801_136	4B	48.0525	B	B	A	B	-	B	B	B	B	A	B	B	B	B	A	B	A	A	B	A	B	A	B	B	A	B	B	A	B	B	A	B	B	-	A	B	B	A	A	A	B	B	A	A	A	B
IWB12238	BS00105308_51	4B	48.4046	B	B	A	B	-	B	B	B	B	A	B	B	B	B	A	B	B	A	B	A	B	A	B	B	A	B	B	A	B	B	A	B	B	-	A	B	B	A	A	A	B	B	A	A	A	B
IWB10045	BS00067428_51	4B	48.4046	B	B	A	B	-	B	B	B	B	A	B	B	B	B	A	B	B	A	B	A	B	A	B	B	A	B	B	A	B	B	A	B	B	-	A	B	B	A	A	A	B	B	A	A	A	B
IWB70755	Tdurum_contig42038_596	4B	48.4046	B	B	A	B	-	B	B	B	B	A	B	B	B	B	A	B	B	A	B	A	B	A	B	B	A	B	B	A	B	B	A	B	B	-	A	B	B	A	A	A	B	B	A	A	A	B
IWB70749	Tdurum_contig42038_1736	4B	48.4046	B	B	A	B	-	B	B	B	B	A	B	B	B	B	A	B	B	A	B	A	B	A	B	B	A	B	B	A	B	B	A	B	B	-	A	B	B	A	A	A	B	B	A	A	A	B
IWB70750	Tdurum_contig42038_1770	4B	48.4046	B	B	A	B	-	B	B	B	B	A	B	B	B	B	A	B	B	A	B	A	B	A	B	B	A	B	B	A	B	B	A	B	B	-	A	B	B	A	A	A	B	B	A	A	A	B
IWB32822	GENE-2129_76	4B	48.7543	B	B	A	B	-	B	B	B	B	A	B	B	B	B	A	B	B	A	B	A	B	A	B	B	A	B	B	A	B	B	A	B	B	-	A	B	B	A	A	A	B	B	A	A	A	B
IWB57047	RAC875_c35152_372	4B	48.7543	B	B	A	B	-	B	B	B	B	A	B	B	B	B	A	B	B	A	B	A	B	A	B	B	A	B	B	A	B	B	A	B	B	-	A	B	B	A	A	A	B	B	A	A	A	B
IWB10577	BS00071792_51	4B	48.7543	B	B	A	B	-	B	B	B	B	A	B	B	B	B	A	B	B	A	B	A	B	A	B	B	A	B	B	A	B	B	A	B	B	-	A	B	B	A	A	A	B	B	A	A	A	B
IWB70047	Tdurum_contig30545_715	4B	48.7543	B	B	A	B	-	B	B	B	B	A	B	B	B	B	A	B	B	A	B	A	B	A	B	B	A	B	B	A	B	B	A	B	B	-	A	B	B	A	A	A	B	B	A	A	A	B
IWB72508	Tdurum_contig56402_57	4B	48.7543	B	B	A	B	-	B	B	B	B	A	B	B	B	B	A	B	B	A	B	A	B	A	B	B	A	B	B	A	B	B	A	B	B	-	A	B	B	A	A	A	B	B	A	A	A	B
IWB35802	IACX1853	4B	48.7543	B	B	A	B	-	B	B	B	B	A	B	B	B	B	A	B	B	A	B	A	B	A	B	B	A	B	B	A	B	B	A	B	B	-	A	B	B	A	A	A	B	B	A	A	A	B
IWB72465	Tdurum_contig5562_730	4B	49.8413	B	B	A	B	-	B	B	B	B	A	B	B	B	B	A	B	B	A	B	A	B	A	B	B	A	B	B	A	B	B	A	B	B	-	A	B	B	A	A	A	B	B	A	A	A	B
IWB21302	Ex_c7593_754	4B	51.2909	B	B	A	B	-	B	B	B	B	A	B	B	B	B	A	B	B	A	B	A	B	A	B	B	A	B	B	A	B	B	A	B	B	-	A	B	B	A	A	A	B	B	A	A	A	B
IWB65829	TA004394-0527	4B	51.2909	B	B	A	B	-	B	B	B	B	A	B	B	B	B	A	B	B	A	B	A	B	A	B	B	A	B	B	A	B	B	A	B	B	-	A	B	B	A	A	A	B	B	A	A	A	B
IWB2965	BobWhite_c38340_243	4B	51.2909	B	B	A	B	-	B	B	B	B	A	B	B	B	B	A	B	B	A	B	A	B	A	B	B	A	B	B	A	B	B	A	B	B	-	A	B	B	A	A	A	B	B	A	A	A	B
IWB34629	IAAV2880	4B	51.6455	B	B	A	B	-	B	B	B	B	A	B	B	B	B	A	B	B	A	B	A	B	A	B	B	A	B	B	A	A	B	A	B	B	-	A	B	B	A	A	A	B	B	A	A	A	B
IWB28921	Excalibur_c7964_1290	4B	57.6259	B	B	B	B	-	B	B	B	B	A	B	A	B	B	A	B	B	A	B	A	B	A	B	B	A	B	B	A	A	B	B	B	B	A	A	A	B	A	B	A	B	B	A	A	A	B
IWB72571	Tdurum_contig57254_254	4B	57.6259	B	B	B	B	-	B	B	B	B	A	B	A	B	B	A	B	B	A	B	A	B	A	B	B	A	B	B	A	A	B	B	B	B	A	A	A	B	A	B	A	B	B	A	A	A	B
IWB72565	Tdurum_contig57212_71	4B	57.9805	B	B	B	B	-	B	B	B	B	A	B	A	B	B	A	B	B	A	B	A	B	A	B	B	A	B	B	A	A	B	B	B	B	A	A	A	B	A	B	A	B	A	A	A	A	B
IWB73838	Tdurum_contig92997_676	4B	57.9805	B	B	B	B	-	B	B	B	B	-	B	A	B	B	A	B	B	A	B	A	B	A	B	B	A	B	B	A	A	B	B	B	B	A	A	A	B	A	B	A	B	A	A	A	A	B
IWB72364	Tdurum_contig54548_1002	4B	57.9805	B	B	B	B	-	B	B	B	B	A	B	A	B	B	A	B	B	A	B	A	B	A	B	B	A	B	B	A	A	B	B	B	B	A	A	A	B	A	B	A	B	A	A	A	A	B
IWB72365	Tdurum_contig54548_1282	4B	57.9805	B	B	B	B	-	B	B	B	B	A	B	A	B	B	A	B	B	A	B	A	B	A	B	B	A	B	B	A	A	B	B	B	B	A	A	A	B	A	B	A	B	A	A	A	A	B
IWB44068	Kukri_c322_1394	4B	67.4121	B	B	-	B	-	B	B	B	B	A	B	A	B	B	A	B	B	B	B	B	B	A	B	B	A	B	B	B	A	B	A	B	B	A	A	A	B	A	B	A	B	A	A	A	B	B
IWB11483	BS00087144_51	4B	69.9878	B	B	-	B	-	B	B	B	B	A	B	A	B	B	A	B	B	B	B	B	B	A	B	B	A	B	B	B	A	B	A	B	B	A	A	A	B	A	B	A	B	A	A	B	B	B
IWB71823	Tdurum_contig47552_957	4B	69.9878	B	B	A	B	-	B	B	B	B	A	B	A	B	B	A	B	B	B	B	B	B	A	B	B	A	B	B	B	A	B	A	B	B	A	A	A	B	A	B	A	B	A	A	B	B	B
IWA1007	wsnp_CAP12_rep_c4278_1949864	4B	70.7072	B	B	-	B	-	-	B	B	B	A	B	A	B	B	A	B	B	B	B	B	B	A	B	B	A	B	B	B	A	B	A	B	B	A	A	A	B	A	B	A	B	A	A	B	B	B
IWB51169	Ra_c15473_681	4B	71.4372	B	B	-	B	-	B	B	B	B	A	B	A	B	B	A	B	B	B	B	B	B	A	B	B	A	B	B	B	A	B	A	B	B	A	A	A	B	A	B	A	B	A	A	B	B	B
IWB73143	Tdurum_contig69157_375	4B	72.1566	B	B	-	B	-	B	B	B	B	A	B	A	B	B	A	B	B	B	B	B	B	A	B	B	A	B	B	B	A	B	A	B	B	A	A	A	B	A	B	A	B	A	A	B	B	B
IWB976	BobWhite_c16963_143	4B	72.5062	B	B	-	B	-	B	B	B	B	A	B	A	B	B	A	B	B	B	B	B	B	A	B	B	A	B	B	B	A	B	A	B	B	A	A	A	B	A	B	A	B	A	A	B	B	B
IWA187	wsnp_BE446161B_Td_2_2	4B	72.5062	B	B	-	B	-	B	B	B	B	A	B	A	B	B	A	B	B	B	B	B	B	A	B	B	A	B	B	B	A	B	A	B	B	A	A	A	B	A	B	A	B	A	A	B	B	B
IWB71858	Tdurum_contig4795_404	4B	73.9351	B	B	-	B	-	B	B	B	B	A	B	A	B	B	A	B	B	B	A	B	B	A	B	B	A	B	B	B	A	B	A	B	B	A	A	A	B	A	B	A	B	A	A	B	B	B
IWB8082	BS00037020_51	4B	76.1423	B	B	-	B	B	B	B	B	B	A	B	A	B	B	A	-	B	B	A	B	B	A	B	B	A	B	B	B	A	B	A	B	B	A	A	A	B	A	B	A	B	A	A	B	-	B
IWB7042	BS00022364_51	4B	76.1423	B	B	-	B	B	B	B	B	B	A	B	A	B	B	A	-	B	B	A	B	B	A	B	B	A	B	B	B	A	B	A	B	B	A	A	A	B	A	B	A	B	A	A	B	-	B
IWB72709	Tdurum_contig60114_525	4B	76.1423	B	B	-	B	B	B	B	B	B	A	B	A	B	B	A	-	B	B	A	B	B	A	B	B	A	B	B	B	A	B	A	B	B	A	A	A	B	A	B	A	B	A	A	B	-	B
IWB35047	IAAV5572	4B	78.0088	B	B	-	B	B	B	B	B	B	A	B	A	B	B	B	-	B	B	A	A	B	A	B	B	A	B	B	B	A	B	A	B	B	A	A	A	B	A	B	A	B	A	A	B	-	B
IWB44538	Kukri_c36207_91	4B	78.0088	B	B	A	B	B	B	B	B	B	A	B	A	B	B	B	-	B	B	A	A	B	A	B	B	A	B	B	B	A	B	A	B	B	A	A	A	B	A	B	A	B	A	A	B	-	B
IWB12276	BS00106144_51	4B	78.0088	B	B	A	B	B	B	B	B	B	A	B	A	B	B	B	-	B	B	A	A	B	A	B	B	A	B	B	B	A	B	A	B	B	A	A	A	B	A	B	A	B	A	A	B	-	B
IWB12223	BS00104364_51	4B	78.0088	B	B	A	B	B	B	B	B	B	A	B	A	B	B	B	-	B	B	A	A	B	A	B	B	A	B	B	B	A	B	A	B	B	A	A	A	B	A	B	A	B	A	A	B	-	B
IWB71580	Tdurum_contig45125_230	4B	79.1283	B	B	A	B	B	-	B	B	B	A	B	A	B	B	A	-	B	B	A	A	B	B	B	B	A	B	B	B	A	B	A	B	B	A	A	A	B	A	B	A	B	A	A	B	-	B
IWA892	wsnp_CAP11_rep_c8663_3738968	4B	79.4959	B	B	A	B	B	-	B	B	B	A	B	A	B	B	A	-	A	B	A	A	B	B	B	B	A	B	B	B	A	B	A	B	B	A	A	A	B	A	-	A	B	A	A	B	-	B
IWB71667	Tdurum_contig46247_300	4B	84.3104	B	B	A	B	B	B	B	B	A	A	B	B	B	B	A	-	A	B	A	A	B	B	B	B	A	B	B	B	A	B	A	B	B	B	A	A	B	A	B	A	B	A	A	B	-	B
IWB72379	Tdurum_contig5470_570	4B	85.7706	B	B	A	B	B	B	B	B	A	A	B	B	B	B	A	-	A	B	A	A	B	B	B	B	A	B	A	B	A	B	A	B	B	B	A	A	B	A	B	A	B	A	A	A	-	B
IWB70997	Tdurum_contig42208_263	4B	85.7706	B	B	A	B	B	B	B	B	A	A	B	B	B	B	A	-	A	B	A	A	B	B	B	B	A	B	A	B	A	B	A	B	B	B	A	A	B	A	B	A	B	A	A	A	-	B
IWB71654	Tdurum_contig45927_663	4B	85.7706	B	B	A	B	B	B	B	B	A	-	B	B	B	B	A	-	A	B	A	A	B	B	B	B	A	B	A	B	A	B	A	B	B	B	A	A	B	A	B	A	B	A	A	A	-	B
IWB72696	Tdurum_contig59914_323	4B	96.1738	B	B	A	A	B	-	B	B	B	A	A	B	B	B	A	A	A	B	A	-	B	B	B	B	A	B	A	B	A	A	B	B	B	B	A	A	B	A	B	A	B	A	A	A	A	B
IWB73977	Tdurum_contig97207_435	4B	99.9978	B	B	A	A	B	-	B	-	B	A	A	B	B	B	A	A	A	B	A	-	B	B	B	B	A	B	A	B	A	A	B	A	B	B	A	A	B	A	B	A	B	A	A	A	A	B
IWB69745	Tdurum_contig29247_404	4B	105.093	B	B	A	A	B	B	B	B	B	A	A	B	B	A	B	A	A	B	A	-	B	B	B	B	A	B	A	B	A	A	B	A	B	B	A	A	B	A	B	A	B	A	A	A	A	B
IWB8229	BS00040517_51	4B	111.376	A	B	A	A	B	B	B	B	B	A	A	B	B	A	B	A	A	B	A	-	B	B	A	A	A	B	A	B	A	A	B	A	B	B	B	B	B	A	B	A	B	A	B	A	A	B
IWB71335	Tdurum_contig42695_410	4B	129.407	A	B	A	A	A	B	B	B	B	A	B	B	B	A	B	A	B	A	A	B	A	B	A	A	B	B	A	A	A	A	B	A	B	B	A	B	B	B	A	A	A	B	B	A	A	B
IWB9483	BS00065222_51	4B	129.749	A	B	A	A	A	B	B	B	B	A	B	B	B	A	B	A	B	A	A	B	A	B	A	A	B	B	A	A	A	A	B	A	B	B	A	B	B	B	A	A	A	B	B	A	A	B
IWB71133	Tdurum_contig42421_1167	5A	0	-	A	-	B	A	A	A	A	A	B	B	A	B	A	A	A	A	A	B	B	A	B	A	A	B	B	B	A	B	A	A	A	A	B	A	A	A	B	B	A	B	B	A	A	B	B
IWB71135	Tdurum_contig42421_552	5A	0	-	A	-	B	A	A	A	A	A	B	B	A	B	A	A	A	A	A	B	B	A	B	A	A	B	B	B	A	B	A	A	A	A	B	A	A	A	B	B	A	B	B	A	A	B	B
IWB10603	BS00072264_51	5A	13.0122	-	A	B	B	A	A	A	A	A	-	B	A	B	B	A	A	A	A	B	B	B	B	A	A	B	B	B	B	B	A	B	B	A	B	A	A	A	B	-	B	B	B	A	B	-	B
IWB7817	BS00031073_51	5A	14.4618	B	A	B	B	A	A	A	A	A	B	B	A	B	B	B	A	A	A	B	B	B	B	A	A	B	B	B	B	B	A	B	B	A	B	A	A	A	B	-	B	B	B	A	B	-	B
IWA4534	wsnp_Ex_c65569_63926293	5A	14.4618	B	A	B	B	A	A	A	A	A	B	B	A	B	B	B	A	A	A	B	B	B	B	A	A	B	B	B	B	B	A	B	B	A	B	A	A	A	B	-	B	B	B	A	B	B	B
IWB41715	Kukri_c17126_1211	5A	14.4618	B	A	B	B	A	A	A	A	A	B	B	A	B	B	B	A	A	A	B	B	B	B	A	A	B	B	B	B	B	A	B	B	A	B	A	A	A	B	-	B	B	B	A	B	-	B
IWB50844	Ra_c10762_1137	5A	14.4618	B	A	B	B	A	A	A	A	A	B	B	A	B	B	B	A	A	A	B	B	B	B	A	A	B	B	B	B	B	A	B	B	A	B	A	A	A	B	-	B	B	B	A	B	-	B
IWA14	wsnp_BE399966A_Ta_2_3	5A	16.669	B	A	B	B	A	A	A	A	A	B	B	A	B	B	B	A	A	A	B	B	B	B	A	A	B	B	B	B	B	A	B	B	A	B	B	B	A	B	-	B	B	B	A	B	-	B
IWB11440	BS00086096_51	5A	16.669	B	A	B	B	A	A	A	A	A	B	B	A	B	B	B	A	A	A	B	B	B	B	A	A	B	B	B	B	B	A	B	B	A	B	B	B	A	B	A	B	B	B	A	B	-	B
IWB11068	BS00079189_51	5A	22.9515	A	B	B	B	A	A	A	A	A	B	B	A	B	B	A	A	A	A	B	B	B	B	A	A	B	A	B	B	A	A	B	B	A	A	A	A	A	B	A	B	B	B	A	B	-	B
IWA4765	wsnp_Ex_c807_1585614	5A	26.3399	A	B	B	B	A	A	A	A	A	A	B	A	B	B	A	A	A	-	B	B	B	B	B	B	B	A	B	B	A	A	-	B	A	A	A	A	A	B	A	B	A	B	A	B	-	B
IWA4766	wsnp_Ex_c807_1586158	5A	26.3399	A	B	B	B	A	A	A	A	A	A	B	A	B	B	A	A	A	-	B	B	B	B	B	B	B	A	B	B	A	A	-	B	A	A	A	A	A	B	A	B	A	B	A	B	-	B
IWB71078	Tdurum_contig42309_627	5A	26.3399	A	B	B	B	A	A	A	A	A	A	B	A	B	B	A	A	A	A	B	B	B	B	B	B	B	A	B	B	A	A	-	B	A	A	A	A	A	B	A	B	A	B	A	B	-	B
IWB8704	BS00056932_51	5A	36.755	A	B	A	B	B	A	A	A	A	A	B	A	B	B	A	A	A	A	B	B	A	B	B	B	B	A	B	B	A	A	-	B	B	A	A	A	A	B	A	B	B	B	A	B	A	B
IWB8460	BS00047242_51	5A	36.755	A	B	A	B	B	A	A	A	A	A	B	A	B	B	A	A	A	A	B	B	A	B	B	B	B	A	B	B	A	A	-	B	B	A	A	A	A	B	A	B	B	B	A	B	A	B
IWB8709	BS00057293_51	5A	36.755	A	B	A	B	B	A	A	A	A	A	B	A	B	B	A	A	A	A	B	B	A	B	B	B	B	A	B	B	A	A	-	B	B	A	A	A	A	B	A	B	B	B	A	B	A	B
IWB8401	BS00045473_51	5A	40.7314	A	B	A	A	B	A	A	A	A	A	-	A	B	B	A	A	A	-	B	B	A	B	B	B	B	A	B	B	A	A	-	A	B	-	B	A	A	A	A	B	B	B	A	B	A	B
IWB10981	BS00077990_51	5A	40.7314	A	B	A	A	B	-	A	A	A	A	B	A	B	B	A	A	A	A	B	B	A	B	B	B	B	A	B	B	A	A	-	A	B	A	B	A	A	A	A	B	B	B	A	B	A	B
IWB49259	Kukri_rep_c107435_940	5A	40.7314	A	B	A	A	B	A	A	A	A	A	B	A	B	B	A	A	A	A	B	B	A	B	B	B	B	A	B	B	A	A	B	A	B	A	B	A	A	A	A	B	B	B	A	B	A	B
IWB6696	BS00021660_51	5A	40.7314	A	B	A	A	B	-	A	A	A	-	B	A	B	B	A	A	A	A	B	B	A	B	B	B	B	A	B	B	A	A	B	A	B	A	B	A	A	A	A	B	B	B	A	B	A	B
IWB12010	BS00097623_51	5A	40.7314	A	B	A	A	B	A	A	A	A	A	B	A	B	B	A	A	A	A	B	B	A	B	B	B	B	A	B	B	A	A	B	A	B	A	B	A	A	A	A	B	B	B	A	B	A	B
IWA3100	wsnp_Ex_c2718_5038582	5A	40.7314	A	B	A	A	B	A	A	A	A	A	B	A	B	B	A	A	A	A	B	B	A	B	B	B	B	A	B	B	A	A	B	A	B	A	B	A	A	A	A	B	B	B	A	B	A	B
IWB11025	BS00078654_51	5A	40.7314	A	B	A	A	B	A	A	A	A	A	B	A	B	B	A	A	A	A	B	B	A	B	B	B	B	A	B	B	A	A	B	A	B	A	B	A	A	A	A	B	B	B	A	B	A	B
IWB54064	RAC875_c15192_51	5A	40.7314	A	B	A	A	B	A	A	A	A	A	B	A	B	B	A	A	A	A	B	B	A	B	B	B	B	A	B	B	A	A	B	A	B	A	B	A	A	A	A	B	B	B	A	B	A	B
IWA7565	wsnp_Ra_c11420_18529863	5A	40.7314	A	B	A	A	B	A	A	A	A	A	B	A	B	B	A	A	A	A	B	B	A	B	B	B	B	A	B	B	A	A	B	A	B	A	B	A	A	A	A	B	B	B	A	B	A	B
IWB8437	BS00046773_51	5A	40.7314	A	B	A	A	B	A	A	A	A	A	B	A	B	B	A	A	A	A	B	B	A	B	B	B	B	A	B	B	A	A	B	A	B	A	B	A	A	A	A	B	B	B	A	B	A	B
IWB10525	BS00071087_51	5A	40.7314	A	B	A	A	B	A	A	A	A	A	B	A	B	B	A	A	A	A	B	B	A	B	B	B	B	A	B	B	A	A	B	A	B	A	B	A	A	A	A	B	B	B	A	B	A	B
IWA6412	wsnp_Ku_c1102_2211433	5A	40.7314	A	B	A	A	B	A	A	A	A	A	B	A	B	B	A	A	A	A	B	B	A	B	B	B	B	A	B	B	A	A	B	A	B	A	B	A	A	A	A	B	B	B	A	B	A	B
IWB8259	BS00041077_51	5A	40.7314	A	B	A	A	B	A	A	A	A	A	B	A	B	B	A	A	A	A	B	B	A	B	B	B	B	A	B	B	A	A	B	A	B	A	B	A	A	A	A	B	B	B	A	B	A	B
IWA8119	wsnp_Ra_rep_c105791_89683548	5A	41.0937	A	B	A	A	B	A	A	A	A	A	B	A	B	B	A	A	A	A	B	B	A	B	B	B	B	A	B	B	A	A	B	A	B	A	B	A	A	A	A	B	B	B	A	B	A	B
IWB8225	BS00040403_51	5A	41.0937	A	B	A	A	B	A	A	A	A	A	B	A	B	B	A	A	A	A	B	B	A	B	B	B	B	A	B	B	A	A	B	A	B	A	B	A	A	A	A	B	B	B	A	B	A	B
IWB56717	RAC875_c323_951	5A	41.0937	A	B	A	A	B	A	A	A	A	-	B	A	B	B	A	A	A	A	B	-	A	B	B	B	B	A	B	B	A	A	B	A	B	A	B	A	A	A	A	B	B	B	A	B	A	B
IWB64755	RFL_Contig4646_526	5A	41.0937	A	B	A	A	B	A	A	A	A	A	B	A	B	B	A	A	A	A	B	B	A	B	B	B	B	A	B	B	A	A	B	A	B	A	B	A	A	A	A	B	B	B	A	B	A	B
IWB64756	RFL_Contig4646_564	5A	41.0937	A	B	A	A	B	A	A	A	A	A	B	A	B	B	A	A	A	A	B	B	A	B	B	B	B	A	B	B	A	A	B	A	B	A	B	A	A	A	A	B	B	B	A	B	A	B
IWA2815	wsnp_Ex_c23509_32746909	5A	41.0937	A	B	A	A	B	A	A	A	A	A	B	A	B	B	A	A	A	A	B	B	A	B	B	B	B	A	B	B	A	A	B	A	B	A	B	A	A	A	A	B	B	B	A	B	A	B
IWB1332	BobWhite_c19985_446	5A	41.793	A	B	A	A	B	A	A	A	A	A	B	A	B	B	A	A	A	A	B	B	A	B	B	B	B	A	B	B	A	A	B	B	B	A	B	A	A	A	A	B	B	B	A	B	A	B
IWA5175	wsnp_Ex_rep_c110023_92574403	5A	42.1426	A	B	A	A	B	A	A	A	A	A	B	A	B	B	A	A	A	A	B	B	A	B	B	B	B	A	B	B	A	A	B	B	B	A	B	A	A	A	A	B	B	B	A	B	A	B
IWA1718	wsnp_Ex_c130_259533	5A	42.1426	A	B	A	A	B	A	A	A	A	A	B	A	B	B	A	A	A	A	B	B	A	B	B	B	B	A	B	B	A	A	B	B	B	A	B	A	A	A	A	B	B	B	A	B	A	B
IWB34955	IAAV4939	5A	42.1426	A	B	A	A	B	A	A	A	A	A	B	A	B	B	A	A	A	A	B	B	A	B	B	B	B	A	B	B	A	A	B	B	B	A	B	A	A	A	A	B	B	B	A	B	A	B
IWB8393	BS00045284_51	5A	42.1426	A	B	A	A	B	-	A	A	A	A	B	A	B	B	A	A	A	A	B	B	A	B	B	B	B	A	B	B	A	A	B	B	B	A	B	A	A	A	A	B	B	B	A	B	A	B
IWB11020	BS00078573_51	5A	42.4972	A	B	A	A	B	A	A	A	A	A	B	A	B	B	A	A	A	A	B	B	A	B	B	B	B	A	B	B	A	A	B	B	B	A	B	A	A	A	A	B	B	B	A	B	A	B
IWB59522	RAC875_c60415_154	5A	42.4972	A	B	A	A	B	A	A	A	A	A	B	A	B	B	A	A	A	A	B	B	A	B	B	B	B	A	B	B	A	A	B	B	B	A	B	A	A	A	A	B	B	B	A	B	A	B
IWB9264	BS00064371_51	5A	42.4972	A	B	A	A	B	A	A	A	A	A	B	A	B	B	A	A	A	-	B	B	A	B	B	B	B	A	B	B	A	A	B	B	B	A	B	A	A	A	A	B	B	B	A	B	A	B
IWB33441	GENE-3524_570	5A	42.4972	A	B	A	A	B	A	A	A	A	A	B	A	B	B	A	A	A	A	B	B	A	B	B	B	B	A	B	B	A	A	B	B	B	A	B	A	A	A	A	B	B	B	A	B	A	B
IWB52121	Ra_c45265_219	5A	42.4972	A	B	A	A	B	-	A	A	A	A	B	A	B	B	A	A	A	A	B	B	A	B	B	B	B	A	B	B	A	A	B	B	B	A	B	A	A	A	A	B	B	B	A	B	A	B
IWB50975	Ra_c1184_61	5A	42.4972	A	B	A	A	B	A	A	A	A	A	B	A	B	B	A	A	A	A	B	B	A	B	B	B	B	A	B	B	A	A	B	B	B	A	B	A	A	A	A	B	B	B	A	B	A	B
IWB67370	Tdurum_contig11975_607	5A	47.5926	A	B	A	A	B	A	A	A	A	A	B	A	B	B	A	A	B	A	A	B	A	B	B	B	B	A	A	B	A	A	B	B	B	A	-	A	A	B	A	B	B	B	A	B	A	B
IWB74726	tplb0041o08_752	5A	47.5926	A	B	A	A	B	A	A	A	A	A	B	A	B	B	A	A	B	A	A	B	A	B	B	B	B	A	A	B	A	A	B	B	B	A	-	A	A	B	A	B	B	B	A	B	A	B
IWB74727	tplb0041o08_974	5A	47.5926	A	B	A	A	B	A	A	A	A	A	B	A	B	B	A	A	B	A	A	B	A	B	B	B	B	A	A	B	A	A	B	B	B	A	-	A	A	B	A	B	B	B	A	B	A	B
IWB53725	RAC875_c13462_66	5A	47.9549	A	B	A	A	B	A	A	A	A	-	B	A	B	B	A	A	B	A	A	B	A	B	B	B	B	A	A	B	A	A	B	B	B	A	-	A	A	B	A	A	B	B	A	B	A	B
IWB10273	BS00068257_51	5A	48.312	A	B	A	A	B	A	A	A	A	A	B	A	B	B	A	A	B	A	A	B	A	B	B	B	B	A	A	B	A	A	B	B	B	A	-	A	A	B	A	A	B	B	A	B	A	B
IWB68380	Tdurum_contig15250_312	5A	48.6692	A	B	A	A	B	A	A	A	A	A	B	A	B	B	A	A	B	A	A	B	A	B	B	B	B	A	A	B	A	A	B	B	B	A	-	A	A	B	A	A	B	B	A	B	A	B
IWB9723	BS00066127_51	5A	49.0263	A	B	A	A	B	A	A	A	A	A	B	A	B	B	A	A	B	A	A	B	A	B	B	B	B	A	A	B	A	A	B	B	B	A	-	A	A	B	A	A	B	B	A	B	A	B
IWA7597	wsnp_Ra_c13_24576	5A	49.0263	A	B	A	A	B	A	A	A	A	A	B	A	B	B	A	A	B	A	A	B	A	B	B	B	B	A	A	B	A	A	B	B	B	A	-	A	A	B	A	A	B	B	A	B	A	B
IWB53643	RAC875_c13_2258	5A	49.0263	A	B	A	A	B	A	A	A	A	A	B	A	B	B	A	A	B	A	A	B	A	B	B	B	B	A	A	B	A	A	B	B	B	A	-	A	A	B	A	A	B	B	A	B	A	B
IWB71584	Tdurum_contig45240_1309	5A	49.7457	A	B	A	A	B	A	A	A	A	A	B	A	B	B	A	A	B	A	A	B	A	B	B	B	B	B	A	B	A	A	B	B	B	A	-	A	A	B	A	A	B	B	A	B	A	B
IWB13508	CAP12_c667_143	5A	49.7457	A	B	A	A	B	A	A	A	A	-	B	A	B	B	A	A	B	-	A	B	A	B	B	B	B	B	A	B	A	A	B	B	B	A	-	A	A	B	A	A	B	B	A	B	A	B
IWB51874	Ra_c33743_472	5A	49.7457	A	B	A	A	B	A	A	A	A	A	B	A	B	B	A	A	B	A	A	B	A	B	B	B	B	B	A	B	A	A	B	B	B	A	-	A	A	B	A	A	B	B	A	B	A	B
IWB38790	Ku_c21587_754	5A	49.7457	A	B	A	A	B	A	A	A	A	A	B	-	B	B	A	A	B	A	A	B	A	B	B	B	B	B	A	B	A	A	B	B	B	A	-	A	A	B	A	A	B	B	A	B	A	B
IWB74436	tplb0031i04_452	5A	50.1134	A	B	A	A	B	A	A	A	A	-	B	A	B	B	A	A	B	A	A	B	A	B	B	B	B	B	A	B	A	A	B	B	B	A	-	A	A	B	A	A	B	B	A	B	A	B
IWB72022	Tdurum_contig49844_958	5A	50.1134	A	B	A	A	B	-	A	A	A	-	B	A	B	B	A	A	B	A	A	B	A	B	B	B	B	B	A	B	A	A	B	B	B	A	-	A	A	B	A	A	B	B	A	B	A	B
IWB9138	BS00063822_51	5A	50.481	A	B	A	A	B	A	A	A	A	A	B	A	B	B	A	A	B	A	A	B	A	B	B	B	B	A	A	B	A	A	B	B	B	A	-	A	A	B	A	A	B	B	A	B	A	B
IWB71919	Tdurum_contig48766_257	5A	54.7882	A	B	A	A	B	A	A	A	A	A	B	B	B	B	A	A	B	A	B	B	A	B	-	A	B	A	A	B	A	A	B	B	-	B	-	A	A	B	A	A	B	B	A	B	A	B
IWB71786	Tdurum_contig4731_1108	5A	54.7882	A	B	A	A	B	A	A	A	A	A	B	B	B	B	A	A	B	A	B	B	A	B	-	A	B	A	A	B	A	A	B	B	-	B	-	A	A	B	A	A	B	B	A	B	A	B
IWB71788	Tdurum_contig4731_552	5A	54.7882	A	B	A	A	B	A	A	A	A	A	B	B	B	B	A	A	B	A	B	B	A	B	-	A	B	A	A	B	A	A	B	B	-	B	-	A	A	B	A	A	B	B	A	B	A	B
IWB71787	Tdurum_contig4731_469	5A	54.7882	A	B	A	A	B	A	A	A	A	A	B	B	B	B	A	A	B	A	B	B	A	B	-	A	B	A	A	B	A	A	B	B	-	B	-	A	A	B	A	A	B	B	A	B	A	B
IWB12396	BS00109052_51	5A	54.7882	A	B	A	A	B	A	A	A	A	A	B	B	B	B	A	A	B	A	B	B	A	B	-	A	B	A	A	B	A	A	B	B	-	B	-	A	A	B	A	A	B	B	A	B	A	B
IWB10054	BS00067453_51	5A	57.0284	A	B	A	A	A	A	A	A	A	A	B	B	B	B	A	A	B	A	B	B	A	B	-	A	B	A	A	B	A	A	B	A	-	B	-	A	A	B	A	A	B	B	B	B	A	B
IWB73508	Tdurum_contig81510_198	5A	57.7584	A	B	A	A	A	A	A	A	A	A	B	B	A	B	A	A	B	A	B	B	A	B	-	A	B	A	A	B	A	A	B	A	-	B	-	A	A	B	A	A	B	B	B	B	A	B
IWB72062	Tdurum_contig50282_279	5A	60.4122	A	B	A	B	A	A	A	A	A	A	B	B	A	B	A	A	B	A	B	B	A	B	-	A	B	A	A	B	A	A	B	A	-	B	-	A	A	B	A	A	B	B	B	B	A	B
IWB73195	Tdurum_contig71302_122	5A	60.4122	A	B	A	B	A	A	A	A	A	A	B	B	A	B	A	A	B	A	B	B	A	B	-	A	B	A	A	B	A	A	B	A	-	B	-	A	A	B	A	A	B	B	B	B	A	B
IWB73545	Tdurum_contig82048_224	5A	62.6864	A	B	A	B	A	A	A	A	A	A	B	B	A	B	A	A	B	A	B	A	A	B	A	A	B	A	A	B	A	A	B	A	A	B	A	A	A	B	A	A	B	B	B	B	A	B
IWB35903	IACX3152	5A	62.6864	A	B	A	B	A	A	A	A	A	A	B	B	A	B	A	A	B	A	B	A	A	B	-	A	B	A	A	B	A	A	B	A	-	B	-	A	A	B	A	A	B	B	B	B	A	B
IWB7653	BS00027465_51	5A	63.4058	A	B	A	B	A	A	A	A	A	-	B	B	A	B	A	A	B	A	B	A	A	B	-	A	B	A	A	B	A	A	B	A	-	B	A	A	A	B	A	A	B	B	B	B	A	A
IWB7654	BS00027466_51	5A	63.4058	A	B	A	B	A	A	A	A	A	A	B	B	A	B	A	A	B	A	B	A	A	B	-	A	B	A	A	B	A	A	B	A	-	B	A	A	A	B	A	A	B	B	B	B	A	A
IWB7125	BS00022509_51	5A	63.4058	A	B	A	B	A	A	A	A	A	A	B	B	A	B	A	A	B	A	B	A	A	B	-	A	B	A	A	B	A	A	B	A	-	B	A	A	A	B	A	A	B	B	B	B	A	A
IWA703	wsnp_CAP11_c2100_1109583	5A	63.4058	A	B	A	B	A	A	A	A	A	A	B	B	A	B	A	A	B	A	B	A	A	B	-	A	B	A	A	B	A	A	B	A	-	B	A	A	A	B	A	A	B	B	B	B	A	A
IWB5443	BobWhite_rep_c64197_143	5A	63.4058	A	B	A	B	A	A	A	A	A	A	B	B	A	B	A	A	B	A	B	A	A	B	-	A	B	A	A	B	A	A	B	A	-	B	A	A	A	B	A	A	B	B	B	B	A	A
IWB7271	BS00022815_51	5A	63.4058	A	B	A	B	A	A	A	A	A	A	B	B	A	B	A	A	B	A	B	A	A	B	-	A	B	A	A	B	A	A	B	A	-	B	A	A	A	B	A	A	B	B	B	B	A	A
IWB73141	Tdurum_contig69079_300	5A	64.1411	A	B	A	B	A	A	A	A	A	A	B	B	A	B	A	A	B	A	B	A	A	B	-	A	B	A	A	B	A	A	B	A	-	B	-	A	A	B	A	A	B	B	B	B	A	B
IWB2714	BobWhite_c34650_78	5A	64.1411	A	B	A	B	A	A	A	A	A	A	B	B	A	B	A	A	B	A	B	A	A	B	-	A	B	A	A	B	A	A	B	A	-	B	-	A	A	B	A	A	B	B	B	B	A	B
IWB5955	BS00004202_51	5A	64.1411	A	B	A	B	A	A	A	A	A	-	B	B	A	B	A	A	B	A	B	A	A	B	-	A	B	A	A	B	A	A	B	A	-	B	-	A	A	B	A	A	B	B	B	B	A	B
IWA5327	wsnp_Ex_rep_c66900_65314012	5A	64.1411	A	B	A	B	A	A	A	A	A	A	B	B	A	B	A	A	B	A	B	A	A	B	-	A	B	A	A	B	A	A	B	A	-	B	-	A	A	B	A	A	B	B	B	B	A	B
IWB7558	BS00024854_51	5A	64.1411	A	B	A	B	A	A	A	A	A	A	B	B	A	B	A	A	B	A	B	A	A	B	-	A	B	A	A	B	A	A	B	A	-	B	-	A	A	B	A	A	B	B	B	B	A	B
IWB6585	BS00013563_51	5A	64.1411	A	B	A	B	A	A	A	A	A	A	B	B	A	B	A	A	B	A	B	A	A	B	-	A	B	A	A	B	A	A	B	A	-	B	-	A	A	B	A	A	B	B	B	B	A	B
IWA6544	wsnp_Ku_c14958_23427256	5A	64.1411	A	B	A	B	A	A	A	A	A	A	B	B	A	B	A	A	B	A	B	A	A	B	-	A	B	A	A	B	A	A	B	A	-	B	-	A	A	B	A	A	B	B	B	B	A	B
IWB64699	RFL_Contig4500_912	5A	64.1411	A	B	A	B	A	A	A	A	A	A	B	B	A	B	A	A	B	A	B	A	A	B	-	A	B	A	A	B	A	A	B	A	-	B	-	A	A	B	A	A	B	B	B	B	A	B
IWB49769	Kukri_rep_c68263_657	5A	64.1411	A	B	A	B	A	A	A	A	A	A	B	B	A	B	A	A	B	A	B	A	A	B	-	A	B	A	A	B	A	A	B	A	-	B	-	A	A	B	A	A	B	B	B	B	A	B
IWB71630	Tdurum_contig4567_172	5A	64.1411	A	B	A	B	A	A	A	A	A	A	B	B	A	B	A	A	B	A	B	A	A	B	-	A	B	A	A	B	A	A	B	A	-	B	-	A	A	B	A	A	B	B	B	B	A	B
IWB73422	Tdurum_contig77524_228	5A	64.1411	A	B	A	B	A	A	A	A	A	A	B	B	A	B	A	A	B	A	B	A	A	B	-	A	B	A	A	B	A	A	B	A	-	B	-	A	A	B	A	A	B	B	B	B	A	B
IWA2917	wsnp_Ex_c24594_33843836	5A	64.1411	A	B	A	B	A	A	A	A	A	A	B	B	A	B	A	A	B	A	B	A	A	B	-	A	B	A	A	B	A	A	B	A	-	B	-	A	A	B	A	A	B	B	B	B	A	B
IWB39499	Ku_c47168_563	5A	71.4573	A	B	A	B	B	A	A	A	A	A	B	B	A	B	A	A	B	A	A	B	B	B	-	B	B	A	A	B	A	B	A	A	A	B	A	A	A	B	A	A	B	B	A	B	A	B
IWB71850	Tdurum_contig47852_422	5A	72.1819	A	B	A	B	B	A	A	A	A	A	B	B	A	B	A	A	B	A	A	B	B	B	-	B	B	A	A	B	A	B	A	A	A	B	A	A	A	B	A	A	B	B	A	B	A	B
IWB73348	Tdurum_contig76136_404	5A	72.1819	A	B	A	B	B	A	A	A	A	-	B	B	A	B	A	A	B	A	A	B	B	B	-	B	B	A	A	B	A	B	A	A	A	B	A	A	A	B	A	A	B	B	A	B	A	B
IWB73963	Tdurum_contig96830_155	5A	72.1819	A	B	A	B	B	A	A	A	A	A	B	B	A	B	A	A	B	A	A	B	B	B	-	B	B	A	A	B	A	B	A	A	A	B	A	A	A	B	A	A	B	B	A	B	A	B
IWB21444	Ex_c9327_1907	5A	72.1819	A	B	A	B	B	A	A	A	A	A	B	B	A	B	A	A	B	A	A	B	B	B	-	B	B	A	A	B	A	B	A	A	A	B	A	A	A	B	A	A	B	B	A	B	A	B
IWB72632	Tdurum_contig59338_1902	5A	72.1819	A	B	A	B	B	A	A	A	A	A	B	B	A	B	A	A	B	A	A	B	B	B	-	B	B	A	A	B	A	B	A	A	A	B	A	A	A	B	A	A	B	B	A	B	A	B
IWB22035	Excalibur_c1208_72	5A	76.0355	A	A	B	B	B	A	A	A	A	A	B	B	A	B	A	A	B	A	B	B	B	B	-	B	B	A	A	B	A	B	A	A	A	B	A	A	B	B	A	A	B	B	A	B	A	B
IWA6574	wsnp_Ku_c15816_24541712	5A	77.1385	A	A	B	B	B	A	A	A	A	A	B	B	A	B	A	A	B	A	B	B	B	B	-	B	B	A	B	B	A	A	A	A	A	B	A	A	B	B	A	A	B	B	A	B	A	B
IWB66091	TA006419-0680	5A	78.6656	A	A	B	B	B	A	A	A	A	A	B	B	A	B	A	A	B	A	B	B	B	B	-	-	B	A	B	B	A	A	-	A	A	B	A	A	B	A	A	A	B	B	A	B	A	B
IWB31092	Excalibur_rep_c69868_123	5A	79.7769	A	A	B	B	A	A	A	A	A	A	B	B	A	B	A	A	B	A	B	B	B	B	-	-	B	A	B	B	A	A	-	A	A	B	A	A	B	A	A	A	B	B	A	B	A	B
IWB19609	Ex_c104539_35	5A	79.7769	A	A	B	B	A	A	A	A	A	A	B	B	A	B	A	A	B	A	B	B	B	B	-	-	B	A	B	B	A	A	-	A	A	B	A	A	B	A	A	A	B	B	A	B	A	B
IWB50162	Kukri_rep_c72046_78	5A	79.7769	A	A	B	B	A	A	A	A	A	A	B	B	A	B	A	A	B	A	B	B	B	B	-	-	B	A	B	B	A	A	-	A	A	B	A	A	B	A	A	A	B	B	A	B	A	B
IWA8588	wsnp_RFL_Contig44_5147697	5A	87.8978	A	B	B	B	A	A	A	A	A	A	A	B	A	A	A	A	B	A	B	A	B	B	-	B	B	A	B	B	A	B	A	A	A	B	A	A	B	A	A	A	B	B	A	B	A	B
IWB7246	BS00022761_51	5A	88.2549	A	B	B	B	A	A	A	A	A	A	A	B	A	A	A	A	A	A	B	A	B	B	-	B	B	A	B	B	A	B	A	A	A	B	A	A	B	A	A	A	B	B	A	B	A	B
IWB7247	BS00022762_51	5A	88.2549	A	B	B	B	A	A	A	A	A	A	A	B	A	A	A	A	A	A	B	A	B	B	-	B	B	A	B	B	A	B	A	A	A	B	A	A	B	A	A	A	B	B	A	B	A	B
IWB8838	BS00061387_51	5A	88.2549	A	B	B	B	A	A	A	A	A	A	A	B	A	A	A	A	A	A	B	A	B	B	-	B	B	A	B	B	A	B	A	A	A	B	A	A	B	A	A	A	B	B	A	B	A	B
IWB6762	BS00021805_51	5A	88.607	A	B	B	B	A	A	A	A	A	A	A	B	A	A	A	A	A	A	B	A	B	B	-	B	B	A	B	B	A	B	A	A	A	B	A	A	B	A	A	A	B	B	A	B	A	B
IWB73108	Tdurum_contig68445_462	5A	89.3213	A	B	B	B	A	A	A	A	A	A	A	B	A	A	B	A	A	A	B	A	B	B	-	B	B	A	B	B	A	B	A	A	A	B	A	A	B	A	A	A	B	B	B	B	A	B
IWB68680	Tdurum_contig17712_200	5A	91.5285	A	B	B	B	A	A	A	A	A	A	A	B	A	A	B	A	A	A	B	A	B	B	-	B	B	A	B	A	A	B	A	A	A	B	A	A	B	A	A	A	B	B	B	B	A	B
IWB71918	Tdurum_contig48760_112	5A	91.5285	A	B	B	B	A	A	A	A	A	A	A	B	A	A	B	A	A	A	B	A	B	B	-	B	B	A	B	A	A	B	A	A	A	B	A	A	B	A	A	A	B	B	B	B	A	B
IWB47646	Kukri_c75754_239	5A	92.2278	A	B	B	B	A	A	A	A	A	A	A	B	A	A	B	A	A	A	B	A	B	B	-	B	B	A	B	A	A	B	A	A	A	B	A	A	B	A	A	A	A	B	B	B	A	B
IWB10250	BS00068178_51	5A	92.2278	A	B	B	B	A	A	A	A	A	A	A	B	A	A	B	A	A	A	B	A	B	B	-	B	B	A	B	A	A	B	A	A	A	B	A	A	B	A	A	A	A	B	B	B	A	B
IWB10594	BS00072156_51	5A	92.2278	A	B	B	B	A	A	A	A	A	A	A	B	A	A	B	A	A	A	B	A	B	B	-	B	B	A	B	A	A	B	A	A	A	B	A	A	B	A	A	A	A	B	B	B	A	B
IWA4687	wsnp_Ex_c7487_12808011	5A	92.5726	A	B	B	B	A	A	A	A	A	A	A	B	A	A	B	A	A	A	B	A	B	B	-	B	B	A	B	A	A	B	A	A	A	B	A	A	B	A	A	A	A	B	B	B	A	B
IWB6371	BS00011235_51	5A	101.413	A	B	B	B	A	A	A	A	B	A	A	A	A	A	B	B	A	A	B	A	B	B	B	B	B	A	B	A	B	A	A	A	A	A	A	A	B	A	B	A	A	B	B	B	A	B
IWB55492	RAC875_c23340_2243	5A	107.491	A	A	B	A	A	A	A	A	B	A	A	A	A	A	B	B	A	A	A	A	B	B	A	-	A	B	B	A	B	B	A	A	A	A	A	A	B	A	B	A	A	A	B	B	B	B
IWB7746	BS00029871_51	5A	113.519	A	A	B	B	A	A	A	A	A	A	A	A	A	A	B	B	A	A	A	A	B	B	B	-	A	B	B	A	B	B	A	A	A	A	A	A	B	A	B	A	A	A	B	B	B	B
IWB73552	Tdurum_contig82190_124	5A	114.591	A	A	B	B	A	A	A	A	A	A	A	A	A	A	B	B	A	A	A	A	B	B	B	-	A	B	B	A	B	B	A	A	A	A	A	A	B	A	B	A	A	A	B	B	B	B
IWB38386	Ku_c13370_656	5A	114.936	A	A	B	B	A	A	A	A	A	A	A	A	A	A	B	B	A	A	A	A	B	B	B	-	A	B	B	A	B	B	A	A	A	A	A	A	B	A	B	A	A	A	B	B	B	B
IWA7025	wsnp_Ku_c40349_48594583	5A	115.64	A	A	B	B	A	A	A	A	A	A	A	A	A	A	B	B	A	A	A	A	B	B	B	-	A	B	B	A	B	B	A	A	A	A	A	A	B	A	B	A	A	A	B	B	B	B
IWB11626	BS00089795_51	5A	115.64	A	A	B	B	A	A	A	A	A	A	A	A	A	A	B	B	A	A	A	A	B	B	B	-	A	B	B	A	B	B	A	A	A	A	A	A	B	A	B	A	A	A	B	B	B	B
IWB38719	Ku_c19858_2078	5A	118.16	A	A	B	A	A	A	A	A	A	A	A	A	A	A	B	B	A	A	A	A	B	B	B	-	A	B	B	B	B	B	A	A	A	A	A	A	B	A	B	A	A	A	B	A	B	B
IWB71855	Tdurum_contig47863_651	5A	118.845	A	A	B	A	A	A	A	A	A	A	A	A	A	A	B	B	A	A	A	A	B	B	B	-	A	B	B	B	B	B	A	A	A	A	A	A	B	A	B	A	A	A	B	A	B	B
IWB10862	BS00076246_51	5A	118.845	A	A	B	A	A	A	A	A	A	A	A	A	A	A	B	B	A	A	A	A	B	B	B	-	A	B	B	B	B	B	A	A	A	A	A	A	B	A	B	A	A	A	B	A	B	B
IWB10726	BS00074299_51	5A	118.845	A	A	B	A	A	A	A	A	A	A	A	A	A	A	B	B	A	A	A	A	B	B	B	-	A	B	B	B	B	B	A	A	A	A	A	A	B	A	B	A	A	A	B	A	B	B
IWB10727	BS00074301_51	5A	118.845	A	A	B	A	A	A	A	A	A	A	A	A	A	A	B	B	A	A	A	A	B	B	B	-	A	B	B	B	B	B	A	A	A	A	A	A	B	A	B	A	A	A	B	A	B	B
IWB73709	Tdurum_contig86202_145	5A	118.845	A	A	B	A	A	A	A	A	A	A	A	A	A	A	B	B	A	A	A	A	B	B	B	-	A	B	B	B	B	B	A	A	A	A	A	A	B	A	B	A	A	A	B	A	B	B
IWB33488	GENE-3601_145	5A	118.845	A	A	B	A	A	A	A	A	A	A	A	A	A	A	B	B	A	A	A	A	B	B	B	-	A	B	B	B	B	B	A	A	A	A	A	A	B	A	B	A	A	A	B	A	B	B
IWB8369	BS00044408_51	5A	119.187	A	A	B	A	A	A	A	A	A	A	A	A	A	A	B	B	A	A	A	A	B	B	B	-	A	B	B	B	B	B	A	A	A	A	A	A	B	A	B	A	A	A	B	A	B	B
IWA6682	wsnp_Ku_c20011_29589289	5A	119.187	A	A	B	A	A	A	A	A	A	A	A	A	A	A	B	B	A	A	A	A	B	B	B	-	A	B	B	B	B	B	A	A	A	A	A	A	B	A	B	A	A	A	B	A	B	B
IWB25138	Excalibur_c31769_793	5A	128.57	A	A	B	A	A	A	A	A	A	A	A	A	A	A	B	B	B	A	A	A	B	B	A	A	A	B	B	B	A	B	A	A	A	A	A	A	B	B	B	A	A	A	B	B	B	B
IWB73150	Tdurum_contig69612_781	5A	128.907	A	A	B	A	A	A	A	A	A	A	A	A	A	A	B	B	B	A	A	A	B	B	A	A	A	B	B	B	A	B	A	A	A	A	A	A	B	B	B	A	A	A	B	B	B	B
IWB37063	JD_c15758_288	5A	128.907	A	A	B	A	A	A	A	A	A	A	A	A	A	A	B	B	B	A	A	A	B	B	A	A	A	B	B	B	A	B	A	A	A	A	A	A	B	B	B	A	A	A	B	B	B	B
IWB27060	Excalibur_c49550_97	5A	129.583	A	A	B	A	A	A	A	A	A	A	A	A	A	A	B	B	B	A	A	A	B	B	A	A	A	B	B	B	A	B	A	A	A	A	A	A	B	B	B	A	A	A	B	B	B	B
IWB66619	Tdurum_contig10587_601	5A	130.611	A	A	B	A	A	A	A	A	A	-	A	A	A	A	B	B	B	A	A	A	B	B	A	A	A	B	B	B	A	B	A	A	A	A	A	A	B	B	B	A	A	A	B	B	B	B
IWB73680	Tdurum_contig85105_286	5A	131.645	A	B	B	A	A	A	A	A	A	A	A	A	A	A	B	B	B	A	A	A	B	B	A	A	A	B	B	B	A	B	A	A	A	A	A	A	B	B	B	A	A	A	B	B	B	B
IWB72381	Tdurum_contig54725_586	5A	135.668	A	B	A	A	A	A	A	A	A	A	A	A	A	A	A	B	B	A	A	A	A	B	A	A	A	A	B	-	A	B	A	B	A	A	A	A	B	B	B	A	A	A	B	B	B	B
IWB61152	RAC875_c9617_395	5A	170.32	B	-	A	B	A	B	B	B	A	B	A	A	A	B	A	B	B	A	A	B	B	B	A	A	B	B	B	B	A	B	B	B	B	-	A	A	A	A	A	B	A	A	A	B	B	A
IWB9130	BS00063793_51	5A	174.115	B	-	A	B	A	B	B	B	A	A	A	B	A	B	A	B	B	A	A	B	B	B	A	A	B	B	B	B	A	A	B	B	B	B	A	A	A	B	A	B	A	B	A	B	B	B
IWB41874	Kukri_c18023_553	5A	174.462	B	-	A	B	A	B	B	B	A	A	A	A	A	B	A	B	B	A	A	B	B	B	A	A	B	B	B	B	A	A	B	B	B	B	A	A	A	B	A	B	A	B	A	B	B	B
IWA1670	wsnp_Ex_c12684_20157261	5A	175.166	B	-	A	B	A	B	B	B	A	A	A	A	A	B	A	B	B	A	A	B	B	B	A	A	B	B	B	B	A	A	B	B	B	B	A	A	A	B	A	B	A	B	A	B	B	B
IWB5368	BobWhite_rep_c63332_67	5A	178.904	B	-	A	B	A	A	A	A	A	A	A	A	A	B	A	B	B	A	A	B	B	B	A	A	B	B	B	B	A	A	B	B	B	A	A	A	A	B	A	B	A	B	A	B	B	B
IWB56756	RAC875_c32639_395	5A	179.608	B	-	A	B	A	A	A	A	A	A	A	A	A	B	A	B	B	A	A	B	B	B	A	A	B	B	B	B	A	A	B	B	B	A	A	A	A	B	A	B	A	B	A	B	B	B
IWB47624	Kukri_c75091_220	5A	179.608	B	-	A	B	A	A	A	A	A	A	A	A	A	B	A	B	B	A	A	B	B	B	A	A	B	B	B	B	A	A	B	B	B	A	A	A	A	B	A	B	A	B	A	B	B	B
IWB7014	BS00022299_51	5A	179.608	B	-	A	B	A	A	A	A	A	A	A	A	A	B	A	B	B	A	A	B	B	B	A	A	B	B	B	B	A	A	B	B	B	A	A	A	A	B	A	B	A	B	A	B	B	B
IWB64432	RFL_Contig3629_1465	5A	179.608	B	-	A	B	A	A	A	A	A	A	A	A	A	B	A	B	B	A	A	B	B	B	A	A	B	B	B	B	A	A	B	B	B	A	A	A	A	B	A	B	A	B	A	B	B	B
IWB23336	Excalibur_c1954_930	5A	179.963	B	-	A	B	A	A	A	A	A	A	A	A	A	B	A	B	B	A	A	B	B	B	A	A	B	B	B	B	A	A	B	B	B	A	A	A	A	B	A	B	A	B	A	B	B	B
IWA7789	wsnp_Ra_c25624_35192195	5A	180.677	B	-	A	B	A	A	A	A	A	A	A	A	A	B	A	B	B	A	A	B	B	B	A	A	B	B	B	B	A	A	B	B	B	A	A	A	A	B	A	B	A	B	A	B	B	B
IWB4261	BobWhite_c6966_236	5A	180.677	B	-	A	B	A	A	A	A	A	A	A	A	A	B	A	B	B	A	A	B	B	B	A	A	B	B	B	B	A	A	B	B	B	A	A	A	A	B	A	B	A	B	A	B	B	B
IWA648	wsnp_CAP11_c1116_654940	5A	180.677	B	-	A	B	A	A	A	A	A	A	A	A	A	B	A	B	B	A	A	B	B	B	A	A	B	B	B	B	A	A	B	B	B	A	A	A	A	B	A	B	A	B	A	B	B	B
IWB13571	CAP12_c956_61	5A	180.677	B	-	A	B	A	A	A	A	A	A	A	A	A	B	A	B	B	A	A	B	B	B	A	A	B	B	B	B	A	A	B	B	B	A	A	A	A	B	A	B	A	B	A	B	B	B
IWA3335	wsnp_Ex_c3136_5798236	5A	181.029	B	-	A	B	A	A	A	A	A	A	A	A	A	B	A	B	B	A	A	B	B	B	A	A	B	B	B	B	A	A	B	B	B	A	A	A	A	B	A	B	A	B	A	B	B	B
IWB8070	BS00036851_51	5A	181.029	B	-	A	B	A	A	A	A	A	A	A	A	A	B	A	B	B	A	A	B	B	B	A	A	B	B	B	B	A	A	B	B	B	A	A	A	A	B	A	B	A	B	A	B	B	B
IWB74351	tplb0029a15_1300	5A	181.029	B	-	A	B	A	A	A	A	A	A	A	A	A	B	A	B	B	A	A	B	B	B	A	A	B	B	B	B	A	A	B	B	B	A	A	A	A	B	A	B	A	B	A	B	B	B
IWB38700	Ku_c19516_384	5A	181.029	B	-	A	B	A	A	A	A	A	A	A	A	A	B	A	B	B	A	A	B	B	B	A	A	B	B	B	B	A	A	B	B	B	A	A	A	A	B	A	B	A	B	A	B	B	B
IWA2947	wsnp_Ex_c2505_4679749	5A	182.5	B	-	A	-	A	A	A	A	A	A	A	A	A	B	A	B	B	A	A	B	B	B	A	A	B	B	B	A	A	A	B	B	B	A	A	A	A	A	A	B	A	B	A	B	B	B
IWB73634	Tdurum_contig8348_831	5A	198.763	B	-	A	-	A	B	B	B	B	A	A	A	A	B	A	B	B	A	B	B	B	A	A	A	B	A	A	A	A	A	B	B	A	A	A	A	A	A	A	B	A	B	A	A	B	B
IWB69406	Tdurum_contig28001_110	5A	198.763	B	-	A	-	A	B	B	B	B	A	A	A	A	B	A	B	B	A	B	B	B	A	A	A	B	A	A	A	A	A	B	B	A	A	A	A	A	A	A	B	A	B	A	A	B	B
IWB10235	BS00068108_51	5A	200.987	B	-	A	-	A	B	B	B	B	A	A	A	A	B	A	B	B	A	B	B	B	A	A	A	B	A	A	A	A	A	B	B	B	A	A	A	A	A	A	B	A	B	A	A	B	B
IWB34655	IAAV3048	5A	201.717	B	-	A	-	A	B	B	B	B	A	A	A	A	B	A	B	B	A	B	B	B	A	A	A	B	A	A	A	A	A	B	B	B	A	A	A	A	A	A	B	A	B	A	A	B	B
IWB51435	Ra_c2142_821	5A	201.717	B	-	A	-	A	B	B	B	B	A	A	A	A	B	A	B	B	A	B	B	B	A	A	A	B	A	A	A	A	A	B	B	B	A	A	A	A	A	A	B	A	B	A	A	B	B
IWA2641	wsnp_Ex_c2171_4072774	5A	203.199	B	-	A	-	A	B	B	B	B	A	A	A	A	B	A	B	B	A	B	B	A	A	A	A	B	A	A	A	A	A	B	B	B	A	A	A	A	A	A	B	A	B	A	A	B	B
IWA2646	wsnp_Ex_c2171_4074003	5A	203.199	B	-	A	-	A	B	B	B	B	A	A	A	A	B	A	B	B	A	B	B	A	A	A	A	B	A	A	A	A	A	B	B	B	A	A	A	A	A	A	B	A	B	A	A	B	B
IWB8858	BS00062280_51	5B	0	B	A	B	B	B	B	B	B	B	B	B	B	B	B	B	A	B	A	-	B	A	B	A	A	B	A	B	A	B	A	B	B	A	B	A	A	B	B	-	-	A	B	B	B	-	B
IWA6402	wsnp_Ku_c10586_17464696	5B	1.4929	B	A	B	B	B	B	B	B	B	B	B	B	B	B	B	B	B	A	-	B	A	B	A	A	B	A	B	A	B	B	B	B	A	B	A	A	B	B	-	-	A	B	B	B	-	B
IWB68150	Tdurum_contig14130_315	5B	1.4929	B	A	B	B	B	B	B	B	B	B	B	B	B	B	B	B	B	A	-	B	A	B	A	A	B	A	B	A	B	B	B	B	A	B	A	A	B	B	-	-	A	B	B	B	-	B
IWB68149	Tdurum_contig14130_245	5B	1.4929	B	A	B	B	B	B	B	B	B	B	B	B	B	B	B	B	B	A	-	B	A	B	A	A	B	A	B	A	B	B	B	B	A	B	A	A	B	B	-	-	A	B	B	B	-	B
IWB7137	BS00022525_51	5B	1.4929	B	A	B	B	B	B	B	B	B	B	B	B	B	B	B	B	B	A	-	B	A	B	A	A	B	A	B	A	B	B	B	B	A	B	A	A	B	B	-	-	A	B	B	B	-	B
IWB11318	BS00083715_51	5B	1.4929	B	A	B	B	B	B	B	B	B	B	B	B	B	B	B	B	B	A	-	B	A	B	A	A	B	A	B	A	B	B	B	B	A	B	A	A	B	B	-	-	A	B	B	B	-	B
IWB10074	BS00067550_51	5B	1.84749	B	A	B	B	B	B	B	B	B	B	B	B	B	B	B	B	B	A	-	B	A	B	A	A	B	A	B	A	B	B	B	B	A	B	A	A	B	B	-	-	A	B	B	B	-	B
IWB29801	Excalibur_rep_c102143_58	5B	1.84749	B	A	B	B	B	B	B	B	B	B	B	B	B	B	B	B	B	A	-	B	A	B	A	A	B	A	B	A	B	B	B	B	A	B	A	A	B	B	-	-	A	B	B	B	-	B
IWB2028	BobWhite_c26680_62	5B	2.2098	B	A	B	B	B	B	B	B	B	B	B	B	B	B	B	B	B	A	-	B	A	B	A	A	B	A	B	A	B	B	B	B	A	B	A	A	B	B	-	-	A	B	B	B	B	B
IWB536	BobWhite_c137_203	5B	4.04876	B	A	B	A	B	B	B	B	B	B	B	B	B	B	A	B	B	A	-	B	A	B	A	A	B	A	B	A	B	B	B	B	A	B	A	A	B	B	-	-	A	B	B	B	B	B
IWA6251	wsnp_JD_rep_c48937_33188230	5B	4.04876	B	A	B	A	B	B	B	B	B	B	B	B	B	B	A	B	B	A	-	B	A	B	A	A	B	A	B	A	B	B	B	B	A	B	A	A	B	B	-	-	A	B	B	B	B	B
IWA3606	wsnp_Ex_c37410_45162707	5B	4.04876	B	A	B	A	B	B	B	B	B	B	B	B	B	B	A	B	B	A	-	B	A	B	A	A	B	A	B	A	B	B	B	B	A	B	A	A	B	B	-	-	A	B	B	B	B	B
IWA3607	wsnp_Ex_c37410_45162932	5B	4.04876	B	A	B	A	B	B	B	B	B	B	B	B	B	B	A	B	B	A	-	B	A	B	A	A	B	A	B	A	B	B	B	B	A	B	A	A	B	B	-	-	A	B	B	B	B	B
IWB9179	BS00064042_51	5B	4.41371	B	A	B	A	B	B	B	B	B	B	B	B	B	B	A	B	B	A	-	B	A	B	A	A	B	A	B	A	B	B	B	B	A	B	A	A	B	B	-	-	A	B	B	B	B	B
IWB6610	BS00015136_51	5B	6.67075	B	A	B	A	B	B	B	B	B	B	B	B	B	B	A	B	B	A	-	B	A	B	A	A	B	A	B	A	B	B	B	B	A	B	A	A	B	B	B	-	A	B	B	B	B	B
IWB34539	IAAV2346	5B	6.67075	B	A	B	A	B	B	B	B	B	B	B	B	B	B	A	B	B	A	-	B	A	B	A	A	B	A	B	A	B	B	B	B	A	B	A	A	B	B	B	-	A	B	B	B	B	B
IWB48848	Kukri_rep_c103150_398	5B	12.6036	B	A	B	A	A	B	B	B	B	A	B	B	B	B	A	B	A	A	-	B	A	B	B	B	B	B	B	A	B	B	B	B	A	B	A	A	B	B	B	-	A	B	A	B	B	B
IWA7181	wsnp_Ku_c568_1187615	5B	12.6036	B	A	B	A	A	B	B	B	B	A	B	B	B	B	A	B	A	A	-	B	A	B	B	B	B	B	B	A	B	B	B	B	A	B	A	A	B	B	B	-	A	B	A	B	B	B
IWB10350	BS00068592_51	5B	19.4455	B	A	B	A	A	B	B	B	B	A	A	B	-	B	A	B	A	A	A	B	A	B	B	B	B	B	B	A	B	B	B	B	B	A	A	A	B	B	B	A	A	B	A	B	B	B
IWB7411	BS00023072_51	5B	21.605	B	A	B	A	A	B	B	B	B	A	A	B	-	B	A	B	A	A	A	B	A	B	B	B	B	B	B	A	B	B	B	B	B	A	A	A	B	B	B	A	A	B	A	B	A	B
IWB34551	IAAV2411	5B	21.605	B	A	B	A	A	B	B	B	B	A	A	B	-	B	A	B	A	A	A	B	A	B	B	B	B	B	B	A	B	B	B	B	B	A	A	A	B	B	B	A	A	B	A	B	A	B
IWB9125	BS00063769_51	5B	21.605	B	A	B	A	A	B	B	B	B	A	A	B	-	B	A	B	A	A	A	B	A	B	B	B	B	B	B	A	B	B	B	B	B	A	A	A	B	B	B	A	A	B	A	B	A	B
IWB50649	Kukri_s113060_116	5B	22.3143	B	A	B	A	A	B	B	B	B	A	A	B	B	B	A	B	A	-	A	B	A	B	B	B	B	B	B	A	B	B	B	B	B	A	A	A	B	A	B	A	A	B	A	B	A	B
IWB43553	Kukri_c2827_439	5B	22.3143	B	A	B	A	A	B	B	B	B	A	A	B	B	B	A	B	A	-	A	B	A	B	B	B	B	B	B	A	B	B	B	B	B	A	A	A	B	A	B	A	A	B	A	B	A	B
IWA7300	wsnp_Ku_c7872_13484038	5B	22.3143	B	A	B	A	A	-	B	B	B	A	A	B	B	B	A	B	A	-	A	B	A	B	B	B	B	B	B	A	B	B	B	B	B	A	A	A	B	A	B	A	A	B	A	B	A	B
IWB51376	Ra_c19837_1031	5B	22.3143	B	A	B	A	A	-	B	B	B	A	A	B	B	B	A	B	A	-	A	B	A	B	B	B	B	B	B	A	B	B	B	B	B	A	A	A	B	A	B	A	A	B	A	B	A	B
IWB20310	Ex_c2571_842	5B	22.3143	B	A	B	A	A	B	B	B	B	A	A	B	B	B	A	B	A	-	A	B	A	B	B	B	B	B	B	A	B	B	B	B	B	A	A	A	B	A	B	A	A	B	A	B	A	B
IWB20311	Ex_c2571_987	5B	22.3143	B	A	B	A	A	B	B	B	B	A	A	B	B	B	A	B	A	-	A	B	A	B	B	B	B	B	B	A	B	B	B	B	B	A	A	A	B	A	B	A	A	B	A	B	A	B
IWB32093	GENE-0782_747	5B	22.3143	B	A	B	A	A	B	B	B	B	-	A	B	B	B	A	B	A	-	A	B	A	B	B	B	B	B	B	A	B	B	B	B	B	A	A	A	B	A	B	A	A	B	A	B	A	B
IWB7549	BS00024717_51	5B	22.3143	B	A	B	A	A	B	B	B	B	A	A	B	B	B	A	B	A	-	A	B	A	B	B	B	B	B	B	A	B	B	B	B	B	A	A	A	B	A	B	A	A	B	A	B	A	B
IWB21704	Excalibur_c10669_997	5B	22.3143	B	A	B	A	A	B	B	B	B	A	A	B	B	B	A	B	A	-	A	B	A	B	B	B	B	B	B	A	B	B	B	B	B	A	A	A	B	A	B	A	A	B	A	B	A	B
IWA1965	wsnp_Ex_c1498_2868339	5B	22.3143	B	A	B	A	A	B	B	B	B	A	A	B	B	B	A	B	A	-	A	B	A	B	B	B	B	B	B	A	B	B	B	B	B	A	A	A	B	A	B	A	A	B	A	B	A	B
IWB72886	Tdurum_contig62320_141	5B	22.3143	B	A	B	A	A	B	B	B	B	A	A	B	B	B	A	B	A	-	A	B	A	B	B	B	B	B	B	A	B	B	B	B	B	A	A	A	B	A	B	A	A	B	A	B	A	B
IWA5079	wsnp_Ex_rep_c103024_88075650	5B	23.7852	B	A	B	A	A	B	B	B	B	A	A	B	B	B	A	B	A	-	A	B	A	B	B	B	B	B	B	A	B	B	B	B	B	-	A	-	B	A	B	A	A	A	A	B	A	B
IWB8592	BS00050709_51	5B	23.7852	B	A	B	A	A	B	B	B	B	A	A	B	B	B	A	B	A	B	A	B	A	B	B	B	B	B	B	A	B	B	B	B	B	B	A	A	B	A	B	A	A	A	A	B	A	B
IWB39198	Ku_c33217_323	5B	27.9613	B	A	B	A	A	B	B	B	B	A	A	B	B	B	A	B	A	-	A	B	A	B	B	B	B	B	B	B	B	B	B	B	B	-	A	A	B	A	B	A	A	A	A	B	A	B
IWB35964	IACX4548	5B	27.9613	B	A	B	A	A	B	B	B	B	A	A	B	B	B	A	B	A	-	A	B	A	B	B	B	B	B	B	B	B	B	B	B	B	-	A	A	B	A	B	A	A	A	A	B	A	B
IWB44044	Kukri_c31961_630	5B	27.9613	B	A	B	A	A	B	B	B	B	A	A	B	B	B	A	B	A	-	A	B	A	B	B	B	B	B	B	B	B	B	B	B	B	-	A	A	B	A	B	A	A	A	A	B	A	B
IWB74498	tplb0033f11_1381	5B	36.5817	B	A	B	A	A	B	B	B	B	A	A	B	B	B	A	A	A	B	A	A	A	B	B	B	B	B	B	B	B	B	B	B	B	B	A	A	B	B	B	A	A	A	A	B	A	B
IWA3633	wsnp_Ex_c3817_6937184	5B	40.6952	B	A	B	A	A	B	B	B	B	A	A	B	B	B	A	A	A	A	A	A	A	B	B	B	A	B	B	B	B	B	B	B	B	B	A	A	B	B	B	A	A	A	B	B	A	B
IWB7678	BS00028183_51	5B	41.4045	B	A	B	A	A	B	B	B	B	A	A	B	B	B	A	A	A	A	A	A	A	B	B	B	A	B	B	B	B	B	B	B	B	B	A	A	B	B	B	A	A	A	B	B	A	B
IWB9364	BS00064767_51	5B	43.9613	B	A	B	A	A	B	B	B	B	A	A	B	B	B	A	A	A	A	A	A	A	B	B	B	A	B	B	B	B	B	B	B	B	B	A	A	B	A	B	A	A	A	B	B	A	B
IWB56529	RAC875_c30829_1711	5B	50.7483	B	A	B	A	A	B	B	B	B	A	A	B	B	B	A	A	A	B	A	A	A	B	B	B	A	B	A	B	B	B	A	B	B	B	A	A	B	A	B	A	A	A	B	B	A	B
IWB5781	BS00001101_51	5B	50.7483	B	A	B	A	A	B	B	B	B	A	A	B	B	B	A	A	A	B	A	A	A	B	B	B	A	B	A	B	B	B	A	B	B	B	A	A	B	A	B	A	A	A	B	B	A	B
IWA2181	wsnp_Ex_c16963_25554400	5B	50.7483	B	A	B	A	A	B	B	B	B	A	A	B	B	B	A	A	A	B	A	A	A	B	B	B	A	B	A	B	B	B	A	B	B	B	A	A	B	A	B	A	A	A	B	B	A	B
IWB65483	TA001996-0818	5B	51.1054	B	A	B	A	B	B	B	B	B	A	A	B	B	B	A	A	A	B	A	A	A	B	B	B	A	B	A	B	B	B	A	B	B	B	A	A	B	A	B	A	A	A	B	B	A	B
IWB7225	BS00022716_51	5B	51.8517	B	A	B	A	B	B	B	-	B	A	A	B	B	B	A	A	A	B	A	A	A	B	B	B	A	B	A	B	B	B	A	B	B	B	A	A	B	A	B	A	A	A	B	B	A	B
IWB9971	BS00067152_51	5B	51.8517	B	A	B	A	B	B	B	B	B	A	A	B	B	B	A	A	A	B	A	A	A	B	B	B	A	B	A	B	B	B	A	B	B	B	A	A	B	A	B	A	A	A	B	B	A	B
IWB35550	IAAV8847	5B	59.2825	B	B	B	A	B	B	B	B	B	B	A	B	B	B	B	A	B	B	A	A	B	B	B	B	A	B	A	B	B	B	A	A	B	B	A	A	B	A	B	A	A	B	B	B	A	B
IWB33292	GENE-3211_372	5B	60.3464	B	B	B	A	B	B	B	B	B	B	B	B	B	A	B	A	B	B	A	A	B	B	B	B	A	B	A	B	B	B	A	A	B	B	A	A	B	A	B	A	A	B	B	B	A	B
IWB5390	BobWhite_rep_c63648_306	5B	60.3464	B	B	B	A	B	B	B	B	B	B	B	B	B	A	B	A	B	B	A	A	B	B	B	B	A	B	A	B	B	B	A	A	B	B	A	A	B	A	B	A	A	B	B	B	A	B
IWB72937	Tdurum_contig63161_121	5B	60.3464	B	B	B	A	B	B	B	B	B	B	B	B	B	A	B	A	B	B	A	A	B	B	B	B	A	B	A	B	B	B	A	A	B	B	A	A	B	A	B	A	A	B	B	B	A	B
IWA6383	wsnp_Ku_c10296_17072695	5B	60.3464	B	B	B	A	B	B	B	B	B	B	B	B	B	A	B	A	B	B	A	A	B	B	B	B	A	B	A	B	B	B	A	A	B	B	A	A	B	A	B	A	A	B	B	B	A	B
IWB20326	Ex_c2615_564	5B	60.3464	B	B	B	A	B	B	B	B	B	B	B	B	B	A	B	A	B	B	A	A	B	B	B	B	A	B	A	B	B	B	A	A	B	B	A	A	B	A	B	A	A	B	B	B	A	B
IWA3025	wsnp_Ex_c2615_4862266	5B	60.3464	B	B	B	A	B	B	B	B	B	B	B	B	B	A	B	A	B	B	A	A	B	B	B	B	A	B	A	B	B	B	A	A	B	B	A	A	B	A	B	A	A	B	B	B	A	B
IWB40681	Kukri_c11815_706	5B	60.3464	B	B	B	A	B	B	B	B	B	B	B	B	B	A	B	A	B	B	A	A	B	B	B	B	A	B	A	B	B	B	A	A	B	B	A	A	B	A	B	A	A	B	B	B	A	B
IWB38177	Ku_c1083_1261	5B	60.7087	B	B	B	A	B	B	B	B	B	B	B	B	B	A	B	-	B	B	A	A	B	B	B	B	A	B	A	B	B	B	A	A	B	B	A	A	B	A	B	A	A	B	B	B	A	B
IWB55641	RAC875_c2437_1569	5B	61.071	B	B	B	A	B	B	B	B	B	B	B	B	B	A	B	A	B	B	A	A	B	B	B	B	A	B	A	B	B	-	A	A	B	B	A	A	B	A	B	A	A	B	B	B	A	B
IWB73110	Tdurum_contig68472_115	5B	61.071	B	B	B	A	B	B	B	B	B	B	B	B	B	A	B	A	B	B	A	A	B	B	B	B	A	B	A	B	B	-	A	A	B	B	A	A	B	A	B	A	A	B	B	B	A	B
IWB9729	BS00066138_51	5B	61.4256	B	B	B	A	B	B	B	B	B	B	B	B	B	A	B	A	B	B	A	A	B	B	B	B	A	B	A	B	B	-	A	A	B	B	A	A	B	A	B	A	A	B	B	B	A	B
IWA4632	wsnp_Ex_c718_1411957	5B	62.1348	B	B	B	A	B	B	B	B	B	B	B	B	B	B	B	A	B	B	A	A	B	B	B	B	A	B	A	B	B	-	A	A	B	B	A	A	B	A	B	A	A	B	B	B	A	B
IWA337	wsnp_BE517711B_Ta_2_1	5B	62.1348	B	B	B	A	B	B	B	B	B	B	B	B	B	B	B	A	B	B	A	A	B	B	B	B	A	B	A	B	B	-	A	A	B	B	A	A	B	A	B	A	A	B	B	B	A	B
IWB6704	BS00021673_51	5B	62.1348	B	B	B	A	B	B	B	B	B	B	B	B	B	B	B	A	B	B	-	-	B	B	B	B	A	B	A	B	B	-	A	A	B	B	-	-	B	A	B	-	A	B	B	B	A	B
IWB33391	GENE-3437_68	5B	62.1348	B	B	B	A	B	B	B	B	B	-	B	B	B	B	B	A	B	B	A	A	B	B	B	B	A	B	A	B	B	-	A	A	B	B	A	A	B	A	B	A	A	B	B	B	A	B
IWB36	BobWhite_c10247_316	5B	73.3716	B	B	B	B	B	-	B	B	B	-	B	A	A	B	A	A	B	B	B	A	A	B	B	B	B	B	A	B	B	B	A	A	B	B	A	A	B	A	B	A	A	A	B	B	A	B
IWB12924	CAP11_c506_72	5B	73.7213	B	B	B	B	B	B	B	B	B	-	B	A	A	B	A	B	B	B	B	A	A	B	B	B	B	B	A	B	B	B	A	A	B	B	A	A	B	A	B	A	A	A	B	B	A	B
IWB38480	Ku_c15213_388	5B	74.8578	B	B	B	B	B	B	B	B	B	-	B	A	A	B	A	-	B	-	B	A	A	B	-	B	-	B	A	B	B	B	A	A	B	B	A	A	-	A	B	A	A	A	B	B	A	B
IWB60359	RAC875_c7486_1667	5B	74.8578	B	B	B	B	B	B	B	B	B	-	B	A	A	B	A	B	B	B	B	A	A	B	B	B	B	B	A	B	B	B	A	A	B	B	A	A	B	A	B	A	A	A	B	B	A	B
IWA8252	wsnp_RFL_Contig1570_778491	5B	76.6315	B	B	B	B	B	B	B	B	B	-	B	A	A	B	A	B	B	B	B	A	A	A	B	B	B	B	A	B	B	B	A	A	B	B	A	A	B	A	B	A	A	A	B	B	A	B
IWA3105	wsnp_Ex_c2727_5053747	5B	76.6315	B	B	B	B	B	B	B	B	B	-	B	A	A	B	A	B	B	B	B	A	A	A	B	B	B	B	A	B	B	B	A	A	B	B	A	A	B	A	B	A	A	A	B	B	A	B
IWB20927	Ex_c5594_77	5B	79.5122	B	B	B	B	B	B	B	B	B	-	B	A	A	B	A	B	B	B	B	B	A	A	B	B	B	B	A	B	B	B	A	A	B	A	A	A	B	A	B	A	A	A	B	B	A	B
IWB31745	GENE-0209_733	5B	80.5686	B	B	B	B	B	B	B	B	B	-	B	A	A	B	A	B	B	B	B	B	A	A	B	B	B	B	A	B	B	B	A	A	B	A	A	A	B	A	B	A	A	A	B	B	A	B
IWB74044	Tdurum_contig98538_176	5B	80.9183	B	B	B	B	B	B	B	B	B	-	B	A	A	B	A	B	B	B	B	B	A	A	B	B	B	B	A	B	B	B	A	A	B	A	A	A	B	A	B	A	A	A	B	B	A	B
IWB35784	IACX17304	5B	80.9183	B	B	B	B	B	B	B	B	B	-	B	A	A	B	A	B	B	B	B	B	A	A	B	B	B	B	A	B	B	B	A	A	B	A	A	A	B	A	B	A	A	A	B	B	A	B
IWB35215	IAAV659	5B	80.9183	B	B	B	B	B	B	B	B	B	-	B	A	A	B	A	B	B	B	B	B	A	A	B	B	B	B	A	B	B	B	A	A	B	A	A	A	B	A	B	A	A	A	B	B	A	B
IWB3615	BobWhite_c4773_85	5B	81.9747	B	B	B	B	B	B	B	B	B	-	B	A	A	B	A	B	B	B	B	B	A	A	B	B	B	B	A	B	B	B	A	A	B	A	A	A	B	A	B	A	A	A	B	B	A	B
IWB18445	D_GBF1XID02HALMS_303	5B	81.9747	B	B	B	B	B	B	B	B	B	-	B	A	A	B	A	B	B	B	B	B	A	A	B	B	B	B	A	B	B	B	A	A	B	A	A	A	B	A	B	A	A	A	B	B	A	B
IWB45714	Kukri_c46932_65	5B	81.9747	B	B	B	B	B	B	B	B	B	-	B	A	A	B	A	B	B	B	B	B	A	A	B	B	B	B	A	B	B	B	A	A	B	A	A	A	B	A	B	A	A	A	B	B	A	B
IWB45712	Kukri_c46932_125	5B	81.9747	B	B	B	B	B	B	B	B	B	-	B	A	A	B	A	B	B	B	B	B	A	A	B	B	B	B	A	B	B	B	A	A	B	A	A	A	B	A	B	A	A	A	B	B	A	B
IWB45713	Kukri_c46932_155	5B	81.9747	B	B	B	B	B	B	B	B	B	-	B	A	A	B	A	B	B	B	B	B	A	A	B	B	B	B	A	B	B	B	A	A	B	A	A	A	B	A	B	A	A	A	B	B	A	B
IWA6112	wsnp_JD_c5795_6955627	5B	81.9747	B	B	B	B	B	B	B	B	B	-	B	A	A	B	A	B	B	B	B	B	A	A	B	B	B	B	A	B	B	B	A	A	B	A	A	A	B	A	B	A	A	A	B	B	A	B
IWB35443	IAAV8195	5B	81.9747	B	B	B	B	B	B	B	B	B	-	B	A	A	B	A	B	B	B	B	B	A	A	B	B	B	B	A	B	B	B	A	A	B	A	A	A	B	A	B	A	A	A	B	B	A	B
IWB56499	RAC875_c30584_75	5B	81.9747	B	B	B	B	B	B	B	B	B	-	B	A	A	B	A	B	B	B	B	B	A	A	B	B	B	B	A	B	B	B	A	A	B	A	A	A	B	A	B	A	A	A	B	B	A	B
IWB41225	Kukri_c14564_1108	5B	81.9747	B	B	B	B	B	B	B	B	B	-	B	A	A	B	A	B	B	B	B	B	A	A	B	B	B	B	A	B	B	B	A	A	B	A	A	A	B	A	B	A	A	A	B	B	A	B
IWB44431	Kukri_c35352_483	5B	90.8151	B	B	B	B	A	B	B	B	B	A	B	B	A	B	A	B	A	B	B	B	A	A	B	B	B	B	A	B	B	A	B	A	B	A	A	A	B	A	B	A	A	A	A	B	A	B
IWB57214	RAC875_c36779_148	5B	91.1599	B	B	B	B	A	B	B	B	B	A	B	B	A	B	A	B	A	B	B	B	A	A	B	B	B	B	A	B	B	A	B	A	B	A	A	A	B	A	B	A	A	A	A	B	A	B
IWB27296	Excalibur_c52162_95	5B	91.1599	B	B	B	B	A	B	B	B	B	A	B	B	A	B	A	B	A	B	B	B	A	A	B	B	B	B	A	B	B	A	B	A	B	A	A	A	B	A	B	A	A	A	A	B	A	B
IWB72810	Tdurum_contig61623_129	5B	91.8544	B	B	B	B	A	B	B	B	B	A	B	B	A	B	A	B	A	B	B	B	A	A	B	B	B	B	A	B	B	A	B	A	B	A	A	A	B	A	B	A	A	A	A	B	A	B
IWB13787	CAP7_c12729_232	5B	91.8544	B	B	B	B	A	B	B	B	B	A	B	B	A	B	A	B	A	B	B	B	A	A	B	B	B	B	A	B	B	A	B	A	B	A	A	A	B	A	B	A	A	A	A	B	A	B
IWB44719	Kukri_c37692_347	5B	91.8544	B	B	B	B	A	B	B	B	B	A	B	B	A	B	A	B	A	B	B	B	A	A	B	B	B	B	A	B	B	A	B	A	B	A	A	A	B	A	B	A	A	A	A	B	A	B
IWB27651	Excalibur_c56310_57	5B	91.8544	B	B	B	B	A	B	B	B	B	A	B	B	A	B	A	B	A	B	B	B	A	A	B	B	B	B	A	B	B	A	B	A	B	A	A	A	B	A	B	A	A	A	A	B	A	B
IWB8527	BS00049083_51	5B	91.8544	B	B	B	B	A	B	B	B	B	A	B	B	A	B	A	B	A	B	B	B	A	A	B	B	B	B	A	B	B	A	B	A	B	A	A	A	B	A	B	A	A	A	A	B	A	B
IWB13523	CAP12_c703_150	5B	91.8544	B	B	B	B	A	B	B	B	B	A	B	B	A	B	A	B	A	B	B	B	A	A	B	B	B	B	A	B	B	A	B	A	B	A	A	A	B	A	B	A	A	A	A	B	A	B
IWB33372	GENE-3383_710	5B	91.8544	B	B	B	B	A	B	B	B	B	A	B	B	A	B	A	B	A	B	B	B	A	A	B	B	B	B	A	B	B	A	B	A	B	A	A	A	B	A	B	A	A	A	A	B	A	B
IWB6687	BS00020982_51	5B	91.8544	B	B	B	B	A	B	B	B	B	A	B	B	A	B	A	B	A	B	B	B	A	A	B	B	B	B	A	B	B	A	B	A	B	A	A	A	B	A	B	A	A	A	A	B	A	B
IWA4793	wsnp_Ex_c8322_14030310	5B	93.9832	B	B	B	B	A	B	B	B	B	A	B	B	A	B	A	B	A	B	B	B	B	A	B	B	B	B	A	B	B	A	B	A	B	A	A	A	B	A	B	A	A	A	A	B	A	B
IWB7745	BS00029869_51	5B	93.9832	B	B	B	B	A	B	B	B	B	A	B	B	A	B	A	B	A	B	B	B	B	A	B	B	B	B	A	B	B	A	B	A	B	A	A	A	B	A	B	A	A	A	A	B	A	B
IWB66975	Tdurum_contig11228_274	5B	97.6935	A	B	B	B	A	B	B	B	B	A	B	B	A	B	A	B	A	B	B	B	B	A	B	B	B	B	A	B	B	A	B	B	B	A	A	A	B	A	B	A	B	A	A	B	A	B
IWB10018	BS00067328_51	5B	98.0336	A	B	B	B	A	B	B	B	B	A	B	B	A	B	A	B	A	B	B	B	B	A	B	B	B	B	A	B	B	A	B	B	B	A	A	A	B	A	B	A	B	A	B	B	A	B
IWB69410	Tdurum_contig28016_254	5B	98.7428	A	B	B	B	A	B	B	B	-	A	B	B	A	B	A	B	A	B	B	B	B	A	B	B	B	B	A	B	B	A	B	B	B	A	A	A	B	A	B	A	B	A	B	B	A	B
IWB14973	CAP8_c890_220	5B	99.8144	A	B	B	B	A	B	B	B	-	A	B	B	A	B	A	B	A	B	B	B	B	A	B	B	B	B	A	B	B	A	B	B	B	A	A	A	B	A	B	A	B	A	B	B	A	B
IWB58682	RAC875_c50755_244	5B	101.943	A	B	B	B	A	B	B	B	-	A	B	B	A	B	A	B	A	A	B	B	B	A	B	B	B	B	B	B	B	-	B	B	B	A	A	A	B	A	B	A	B	A	A	B	A	B
IWB12087	BS00099719_51	5B	102.638	A	B	B	B	A	B	B	B	A	A	B	B	A	B	A	B	A	A	B	B	B	A	B	B	B	B	B	B	B	-	B	B	B	A	A	A	B	A	B	A	B	A	A	B	A	B
IWA7910	wsnp_Ra_c39562_47242455	5B	102.638	A	B	B	B	A	B	B	B	A	A	B	B	A	B	A	B	A	A	B	B	B	A	B	B	B	B	B	B	B	-	B	B	B	A	A	A	B	A	B	A	B	A	A	B	A	B
IWB7415	BS00023077_51	5B	102.638	A	B	B	B	A	B	B	B	A	A	B	B	A	B	A	B	A	A	B	B	B	A	B	B	B	B	B	B	B	-	B	B	B	A	A	A	B	A	B	A	B	A	A	B	A	B
IWB46962	Kukri_c6176_1400	5B	113.208	A	B	B	A	B	B	B	B	A	B	B	A	A	B	A	B	A	-	B	A	B	A	A	A	B	B	B	B	B	-	B	B	B	B	A	A	B	A	B	A	B	B	A	A	A	A
IWB71751	Tdurum_contig47071_1322	5B	123.436	A	B	B	A	B	-	B	A	A	B	B	A	B	B	A	-	A	A	B	B	B	A	B	B	B	B	A	B	B	-	B	B	B	B	A	A	B	A	A	B	B	A	B	A	A	A
IWB63594	RFL_Contig1265_515	5B	123.436	A	B	B	A	B	-	B	A	A	B	B	A	B	B	A	-	A	A	B	B	B	A	B	B	B	B	A	B	B	-	B	B	B	B	A	A	B	A	A	B	B	A	B	A	A	A
IWB73546	Tdurum_contig82077_129	5B	123.436	A	B	B	A	B	-	B	A	A	B	B	A	B	B	A	-	A	A	B	B	B	A	B	B	B	B	A	B	B	-	B	B	B	B	A	A	B	A	A	B	B	A	B	A	A	A
IWB64048	RFL_Contig2772_1693	5B	124.531	A	B	B	A	B	-	B	A	A	B	B	A	B	B	A	-	A	A	B	B	B	A	-	B	B	B	A	B	B	-	B	B	B	B	A	A	B	B	A	B	B	A	B	A	A	A
IWB69510	Tdurum_contig28377_271	5B	124.893	A	B	B	A	B	-	B	A	A	B	B	A	B	B	A	-	A	A	B	B	B	A	-	B	B	B	A	B	B	-	B	B	B	B	A	A	B	B	A	B	B	A	B	A	A	A
IWB69025	Tdurum_contig24416_284	5B	132.514	A	B	B	A	A	-	B	A	A	B	A	A	B	B	A	A	A	B	B	B	B	A	-	B	A	B	A	B	B	-	B	B	B	A	B	B	B	A	A	B	B	A	B	B	A	A
IWB67732	Tdurum_contig12776_278	5B	132.871	A	B	B	A	A	-	B	A	A	B	A	A	B	B	A	A	A	B	B	B	B	A	-	B	A	B	A	B	B	-	B	B	B	A	B	B	B	A	A	B	B	A	B	B	A	A
IWB34592	IAAV265	5B	135.428	A	B	B	A	A	-	B	A	A	B	A	B	B	B	A	B	A	B	B	A	B	A	-	B	A	B	A	B	B	-	B	B	B	A	B	B	B	A	A	B	B	A	B	B	A	A
IWB72048	Tdurum_contig5017_1015	5B	135.428	A	B	B	A	A	-	B	A	A	B	A	B	B	B	A	B	A	B	B	A	B	A	-	B	A	B	A	B	B	-	B	B	B	A	B	B	B	A	A	B	B	A	B	B	A	A
IWB73222	Tdurum_contig7459_1061	5B	135.428	A	B	B	A	A	-	B	A	A	-	A	B	B	B	A	B	A	B	B	A	B	A	-	B	A	B	A	B	B	-	B	B	B	A	B	B	B	A	A	B	B	A	B	B	A	A
IWB7593	BS00025795_51	5B	135.804	A	B	B	A	A	-	B	A	A	B	A	-	B	B	A	B	A	B	B	A	B	A	-	B	A	B	A	B	B	-	B	B	B	A	B	B	B	A	A	B	B	A	B	-	A	A
IWB70781	Tdurum_contig42069_208	5B	135.804	A	B	B	A	A	-	B	A	A	B	A	B	B	B	A	B	A	B	B	A	B	A	-	B	A	B	A	B	B	-	B	B	B	A	B	B	B	A	A	B	B	A	B	B	A	A
IWB71831	Tdurum_contig47627_442	5B	137.212	A	B	B	A	A	-	B	A	A	B	A	B	B	B	A	B	A	B	B	A	B	A	-	B	A	B	A	B	B	-	B	B	B	A	B	B	B	A	A	B	B	A	B	B	A	A
IWB64707	RFL_Contig4520_749	5B	137.212	A	B	B	A	A	-	B	A	A	B	A	B	B	B	A	B	A	B	B	A	B	A	-	B	A	B	A	B	B	-	B	B	B	A	B	B	B	A	A	B	B	A	B	B	A	A
IWB71894	Tdurum_contig48443_1323	5B	137.212	A	B	B	A	A	-	B	A	A	B	A	B	B	B	A	B	A	B	B	A	B	A	-	B	A	B	A	B	B	-	B	B	B	A	B	B	B	A	A	B	B	A	B	B	A	A
IWB73814	Tdurum_contig92805_192	5B	137.212	A	B	B	A	A	-	B	A	A	B	A	B	B	B	A	B	A	B	B	A	B	A	-	B	A	B	A	B	B	-	B	B	B	A	B	B	B	A	A	B	B	A	B	B	A	A
IWB7744	BS00029852_51	5B	137.212	A	B	B	A	A	-	B	A	A	B	A	B	B	B	A	B	A	B	B	A	B	A	-	B	A	B	A	B	B	-	B	B	B	A	B	B	B	A	A	B	B	A	B	B	A	A
IWB6980	BS00022231_51	5B	137.212	A	B	B	A	A	-	B	A	A	B	A	B	B	B	A	B	A	B	B	A	B	A	-	B	A	B	A	B	B	-	B	B	B	A	B	B	B	A	A	B	B	A	B	B	A	A
IWB70546	Tdurum_contig35470_227	5B	146.563	A	B	A	A	A	B	B	A	A	B	B	B	B	B	A	B	A	B	B	A	-	A	B	B	A	B	A	B	B	-	B	A	B	-	B	B	B	A	B	B	B	A	B	B	A	A
IWB11032	BS00078784_51	5B	150.329	A	B	A	A	A	B	B	A	A	B	B	B	B	B	A	B	A	B	B	A	-	A	B	B	B	B	A	B	B	-	B	A	B	B	B	B	B	A	B	B	B	A	B	B	A	A
IWB7672	BS00028082_51	5B	150.329	A	B	A	A	A	B	B	A	A	B	B	B	B	B	A	B	A	B	B	A	-	A	B	B	B	B	A	B	B	-	B	A	B	B	B	B	B	A	B	B	B	A	B	B	A	A
IWB73548	Tdurum_contig8210_317	5B	150.329	A	B	A	A	A	B	B	A	A	B	B	B	B	B	A	B	A	B	B	A	-	A	B	B	B	B	A	B	B	-	B	A	B	B	B	B	B	A	B	B	B	A	B	B	A	A
IWB72617	Tdurum_contig58293_582	5B	154.887	A	B	A	A	A	B	B	B	A	B	A	B	B	B	A	B	A	B	B	A	-	A	A	A	B	B	A	B	B	B	-	A	B	B	B	B	B	A	A	B	B	A	B	B	A	A
IWB73596	Tdurum_contig82805_271	5B	158.625	A	B	A	A	A	A	A	A	A	B	A	B	A	B	A	B	A	B	B	B	-	A	B	A	B	B	A	B	B	B	-	A	B	B	B	B	B	A	A	B	B	A	B	B	A	A
IWB40755	Kukri_c1214_437	5B	166.347	A	B	B	A	A	A	A	A	A	B	A	B	A	B	A	B	A	B	B	B	A	B	B	A	B	B	A	A	B	B	-	A	B	B	B	B	-	B	A	B	B	A	B	B	A	A
IWB40750	Kukri_c1214_2247	5B	166.347	A	B	B	A	A	A	A	A	A	B	A	B	A	B	A	B	A	B	B	B	A	B	B	A	B	B	A	A	B	B	-	A	B	B	B	B	-	B	A	B	B	A	B	B	A	A
IWA3360	wsnp_Ex_c3175_5864594	5B	166.347	A	B	B	A	A	A	A	A	A	B	A	B	A	B	A	B	A	B	B	B	A	B	B	A	B	B	A	A	B	B	-	A	B	B	B	B	-	B	A	B	B	A	B	B	A	A
IWB72701	Tdurum_contig59965_403	5B	169.335	A	B	B	A	A	A	A	A	A	B	A	B	A	B	A	B	A	B	B	B	A	B	A	A	B	B	A	A	B	B	-	A	B	B	B	B	-	B	A	B	B	A	A	B	-	A
IWB72670	Tdurum_contig59631_111	5B	169.687	A	B	B	A	A	A	A	A	A	B	A	B	A	B	A	B	A	B	B	B	A	B	A	A	B	B	A	A	B	B	-	A	B	B	B	B	-	B	A	B	B	A	A	B	-	A
IWB72671	Tdurum_contig59631_198	5B	169.687	A	B	B	A	A	A	A	A	A	B	A	B	A	B	A	B	A	B	B	B	A	B	A	A	B	B	A	A	B	B	-	A	B	B	B	B	-	B	A	B	B	A	A	B	-	A
IWB65485	TA001999-1324	5B	170.428	A	B	B	A	A	A	A	A	A	B	A	B	A	B	A	B	A	B	B	B	A	B	-	A	B	B	A	A	B	B	-	A	B	B	B	B	-	B	A	B	B	-	A	B	B	A
IWB54957	RAC875_c20161_821	5B	171.932	A	B	B	A	A	A	A	A	A	B	A	B	A	B	A	B	A	B	B	B	A	B	A	A	B	B	A	A	B	B	-	A	B	B	B	B	A	B	A	B	B	A	A	B	B	A
IWB73352	Tdurum_contig76150_816	5B	171.932	A	B	B	A	A	A	A	A	A	B	A	B	A	B	A	B	A	B	B	B	A	B	A	A	B	B	A	A	B	B	-	A	B	B	B	B	A	B	A	B	B	A	A	B	B	A
IWB71515	Tdurum_contig44271_1220	5B	176.239	A	B	B	A	A	A	A	A	A	B	A	B	A	B	B	B	A	B	B	B	A	B	A	A	B	-	A	A	B	B	A	A	B	B	B	B	A	A	A	B	B	A	A	B	B	A
IWB73995	Tdurum_contig9749_66	5B	176.964	A	B	B	A	A	A	A	A	A	B	A	B	A	B	B	B	A	B	B	B	A	B	A	A	B	-	A	B	B	B	A	A	B	B	B	B	A	A	A	B	B	A	A	B	B	A
IWB72181	Tdurum_contig51416_414	5B	176.964	A	B	B	A	A	A	A	A	A	B	A	B	A	B	B	B	A	B	B	B	A	B	A	A	B	-	A	B	B	B	A	A	B	B	B	B	A	A	A	B	B	A	A	B	B	A
IWB42485	Kukri_c21384_1758	5B	177.678	B	B	B	A	A	A	A	A	A	B	A	B	A	B	B	B	A	B	B	B	A	B	A	A	B	-	A	B	B	B	A	A	B	B	B	B	A	A	A	B	B	A	A	B	B	A
IWA6578	wsnp_Ku_c16116_24914991	5B	177.678	B	B	B	A	A	A	A	A	A	B	A	B	A	B	B	B	A	B	B	B	A	B	A	A	B	-	A	B	B	B	A	A	B	B	B	B	A	A	A	B	B	A	A	B	B	A
IWA6937	wsnp_Ku_c34036_43438136	6A	0	B	B	A	B	B	B	B	B	A	A	A	B	A	A	B	B	A	B	B	A	A	B	A	A	B	B	B	A	B	A	A	B	-	B	B	B	B	A	A	A	B	B	A	A	A	B
IWB67724	Tdurum_contig12749_255	6A	0.347211	B	B	A	B	B	B	B	B	A	A	A	B	A	A	B	B	A	B	B	A	A	B	A	A	B	B	B	A	B	A	A	B	-	B	B	B	B	A	A	A	B	B	A	A	A	B
IWB62636	RAC875_rep_c70001_263	6A	0.347211	B	B	A	B	B	B	B	B	A	A	A	B	A	A	B	B	A	B	B	A	A	B	A	A	B	B	B	A	B	A	A	B	-	B	B	B	B	A	A	A	B	B	A	A	A	B
IWB24293	Excalibur_c25276_314	6A	0.347211	B	B	A	B	B	B	B	B	A	A	A	B	A	A	B	B	A	B	B	A	A	B	A	A	B	B	B	A	B	A	A	B	-	B	B	B	B	A	A	A	B	B	A	A	A	B
IWB11959	BS00096519_51	6A	0.347211	B	B	A	B	B	B	B	B	A	A	A	B	A	A	B	B	A	B	B	A	A	B	A	A	B	B	B	A	B	A	A	B	-	B	B	B	B	A	A	A	B	B	A	A	A	B
IWB22702	Excalibur_c15851_590	6A	0.347211	B	B	A	B	B	B	B	B	A	A	A	B	A	A	B	B	A	B	B	A	A	B	A	A	B	B	B	A	B	A	A	B	-	B	B	B	B	A	A	A	B	B	A	A	A	B
IWB60233	RAC875_c68978_220	6A	0.694422	B	B	A	B	B	B	B	B	A	A	A	B	A	A	B	B	A	B	B	A	A	B	A	A	B	B	B	A	B	A	A	B	-	B	B	B	B	A	A	A	B	B	A	A	A	B
IWB58271	RAC875_c4668_771	6A	0.694422	B	B	A	B	B	B	B	B	A	A	A	B	A	A	B	B	A	B	B	A	A	B	A	A	B	B	B	A	B	A	A	B	-	B	B	B	B	A	A	A	B	B	A	A	A	B
IWB11315	BS00083630_51	6A	0.694422	B	B	A	B	B	B	B	B	A	A	A	B	A	A	B	B	A	B	B	A	A	B	A	A	B	B	B	A	B	A	A	B	-	B	B	B	B	A	A	A	B	B	A	A	A	B
IWB43808	Kukri_c3009_1702	6A	0.694422	B	B	A	B	B	B	B	B	A	A	A	B	A	A	B	B	A	B	B	A	A	B	A	A	B	B	B	A	B	A	A	B	-	B	B	B	B	A	A	A	B	B	A	A	A	B
IWB35595	IAAV9150	6A	0.694422	B	B	A	B	B	B	B	B	A	A	A	B	A	A	B	B	A	B	B	A	A	B	A	A	B	B	B	A	B	A	A	B	-	B	B	B	B	A	A	A	B	B	A	A	A	B
IWB72510	Tdurum_contig56431_637	6A	1.04163	B	B	A	B	B	B	B	B	A	A	A	B	A	A	B	B	A	B	B	A	A	B	A	A	B	B	B	A	B	A	A	B	-	B	B	B	B	A	A	A	B	B	A	A	A	B
IWA705	wsnp_CAP11_c2142_1128735	6A	2.09807	B	B	A	B	B	B	B	B	A	A	A	B	A	A	B	B	A	B	B	A	A	B	A	A	B	B	B	A	B	A	A	B	-	B	B	B	A	A	A	B	B	B	A	A	A	B
IWB7581	BS00025560_51	6A	2.44771	B	B	A	B	B	B	B	B	A	A	A	B	A	A	B	B	A	B	B	A	A	B	A	A	B	B	B	A	B	A	A	B	-	B	B	B	A	A	A	B	B	B	A	A	A	B
IWB66617	Tdurum_contig10580_316	6A	2.44771	B	B	A	B	B	B	B	B	A	A	A	B	A	A	B	B	A	B	B	A	A	B	A	A	B	B	B	A	B	A	A	B	-	B	B	B	A	A	A	B	B	B	A	A	A	B
IWB11976	BS00096853_51	6A	3.14702	B	B	A	B	B	B	B	B	A	A	A	B	A	A	B	B	A	B	B	A	A	A	A	A	B	B	B	A	B	A	A	B	-	B	B	B	A	A	A	B	B	B	A	A	A	B
IWB34573	IAAV2577	6A	4.92073	B	B	A	B	B	B	B	B	A	A	A	B	A	A	B	B	A	B	B	A	A	A	A	A	B	B	B	B	B	A	A	B	-	B	B	B	A	A	A	A	B	B	A	A	A	B
IWB43099	Kukri_c25244_199	6A	4.92073	B	B	A	B	B	B	B	B	A	A	A	B	A	A	B	B	A	B	B	A	A	A	A	A	B	B	B	B	B	A	A	B	-	B	B	B	A	A	A	A	B	B	A	A	A	B
IWB12052	BS00098857_51	6A	4.92073	B	B	A	B	B	B	B	B	A	A	A	B	A	A	B	B	A	B	B	A	A	A	A	A	B	B	B	B	B	A	A	B	-	B	B	B	A	A	A	A	B	B	A	A	A	B
IWB69896	Tdurum_contig29823_203	6A	4.92073	B	B	A	B	B	B	B	B	A	A	A	B	A	A	B	B	A	B	B	A	A	A	A	A	B	B	B	B	B	A	A	B	-	B	B	B	A	A	A	A	B	B	A	A	A	B
IWB20433	Ex_c2978_643	6A	4.92073	B	B	A	B	B	B	B	B	A	A	A	B	A	A	B	B	A	B	B	A	A	A	A	A	B	B	B	B	B	A	A	B	-	B	B	B	A	A	A	A	B	B	A	A	A	B
IWB14410	CAP7_rep_c5315_221	6A	4.92073	B	B	A	B	B	B	B	B	A	A	A	B	A	A	B	B	A	B	B	A	A	A	A	A	B	B	B	B	B	A	A	B	-	B	B	B	A	A	A	A	B	B	A	A	A	B
IWB3722	BobWhite_c5092_422	6A	4.92073	B	B	A	B	B	B	B	B	A	A	A	B	A	A	B	B	A	B	B	A	A	A	A	A	B	B	B	B	B	A	A	B	-	B	B	B	A	A	A	A	B	B	A	A	A	B
IWB12262	BS00105913_51	6A	4.92073	B	B	A	B	B	B	B	B	A	A	A	B	A	A	B	B	A	B	B	A	A	A	A	A	B	B	B	B	B	A	A	B	-	B	B	B	A	A	A	A	B	B	A	A	A	B
IWB12261	BS00105910_51	6A	4.92073	B	B	A	B	B	B	B	B	A	A	A	B	A	A	B	B	A	B	B	A	A	A	A	A	B	B	B	B	B	A	A	B	-	B	B	B	A	A	A	A	B	B	A	A	A	B
IWB56165	RAC875_c28122_475	6A	4.92073	B	B	A	B	B	B	B	B	A	A	A	B	A	A	B	B	A	B	B	A	A	A	A	A	B	B	B	B	B	A	A	B	-	B	B	B	A	A	A	A	B	B	A	A	A	B
IWB26293	Excalibur_c4202_1326	6A	4.92073	B	B	A	B	B	B	B	B	A	A	A	B	A	A	B	B	A	B	B	A	A	A	A	A	B	B	B	B	B	A	A	B	-	B	B	B	A	A	A	A	B	B	A	A	A	B
IWA6981	wsnp_Ku_c38351_47009610	6A	4.92073	B	B	A	B	B	B	B	B	A	A	A	B	A	A	B	B	A	B	B	A	A	A	A	A	B	B	B	B	B	A	A	B	-	B	B	B	A	A	A	A	B	B	A	A	A	B
IWB49922	Kukri_rep_c69659_71	6A	4.92073	B	B	A	B	B	B	B	B	A	A	A	B	A	A	B	B	A	B	B	A	A	A	A	A	B	B	B	B	B	A	A	B	-	B	B	B	A	A	A	A	B	B	A	A	A	B
IWA6178	wsnp_JD_c7718_8795833	6A	4.92073	B	B	A	B	B	B	B	B	A	A	A	B	A	A	B	B	A	B	B	A	A	A	A	A	B	B	B	B	B	A	A	B	-	B	B	B	A	A	A	A	B	B	A	A	A	B
IWA5503	wsnp_Ex_rep_c68165_66935148	6A	4.92073	B	B	A	B	B	B	B	B	A	A	A	B	A	A	B	B	A	B	B	A	A	A	A	A	B	B	B	B	B	A	A	B	-	B	B	B	A	A	A	A	B	B	A	A	A	B
IWA5502	wsnp_Ex_rep_c68165_66935041	6A	4.92073	B	B	A	B	B	B	B	B	A	A	A	B	A	A	B	B	A	B	B	A	A	A	A	A	B	B	B	B	B	A	A	B	-	B	B	B	A	A	A	A	B	B	A	A	A	B
IWA5501	wsnp_Ex_rep_c68165_66935014	6A	4.92073	B	B	A	B	B	B	B	B	A	A	A	B	A	A	B	B	A	B	B	A	A	A	A	A	B	B	B	B	B	A	A	B	-	B	B	B	A	A	A	A	B	B	A	A	A	B
IWB63355	RAC875_rep_c97032_73	6A	4.92073	B	B	A	B	B	B	B	B	A	A	A	B	A	A	B	B	A	B	B	A	A	A	A	A	B	B	B	B	B	A	A	B	-	B	B	B	A	A	A	A	B	B	A	A	A	B
IWB52075	Ra_c4286_1000	6A	4.92073	B	B	A	B	B	B	B	B	A	A	A	B	A	A	B	B	A	B	B	A	A	A	A	A	B	B	B	B	B	A	A	B	-	B	B	B	A	A	A	A	B	B	A	A	A	B
IWB20556	Ex_c3530_106	6A	4.92073	B	B	A	B	B	B	B	B	A	A	A	B	A	A	B	B	A	B	B	A	A	A	A	A	B	B	B	B	B	A	A	B	-	B	B	B	A	A	A	A	B	B	A	A	A	B
IWA3519	wsnp_Ex_c3530_6459643	6A	4.92073	B	B	A	B	B	B	B	B	A	A	A	B	A	A	B	B	A	B	B	A	A	A	A	A	B	B	B	B	B	A	A	B	-	B	B	B	A	A	A	A	B	B	A	A	A	B
IWB7466	BS00023192_51	6A	5.61039	B	B	A	B	B	B	B	B	A	A	A	B	A	A	B	A	A	B	B	A	A	A	A	A	B	B	B	B	B	A	A	B	-	B	B	B	A	A	A	A	B	B	A	A	A	B
IWB10958	BS00077789_51	6A	8.13038	B	B	A	B	B	B	B	B	A	A	A	B	A	A	B	A	B	B	B	A	A	A	A	A	B	B	B	B	B	A	A	B	-	B	B	B	A	A	A	A	B	B	A	A	A	B
IWB7337	BS00022951_51	6A	9.52928	B	B	A	B	B	B	B	B	A	A	A	B	A	A	B	A	B	B	B	A	A	A	A	A	B	B	B	B	B	A	A	B	-	B	B	B	A	A	A	A	B	B	A	A	A	B
IWB29014	Excalibur_c8197_381	6A	9.52928	B	B	A	B	B	B	B	B	A	A	A	B	A	A	B	A	B	B	B	A	A	A	A	A	B	B	B	B	B	A	A	B	-	B	B	B	A	A	A	A	B	B	A	A	A	B
IWB6327	BS00011010_51	6A	9.52928	B	B	A	B	B	B	B	B	A	A	A	B	A	A	B	A	B	B	B	A	A	A	A	A	B	B	B	B	B	A	A	B	-	B	B	B	A	A	A	A	B	B	A	A	A	B
IWB67933	Tdurum_contig13287_203	6A	9.52928	B	B	A	B	B	B	B	B	A	A	A	B	A	A	B	A	B	B	B	A	A	A	A	A	B	B	B	B	B	A	A	B	-	B	B	B	A	A	A	A	B	B	A	A	A	B
IWB73287	Tdurum_contig75595_643	6A	9.52928	B	B	A	B	B	B	B	B	A	A	A	B	A	A	B	A	B	B	B	A	A	A	A	A	B	B	B	B	B	A	A	B	-	B	B	B	A	A	A	A	B	B	A	A	A	B
IWB33864	GENE-4235_196	6A	9.52928	B	B	A	B	B	B	B	B	A	A	A	B	A	A	B	A	B	B	B	A	A	A	A	A	B	B	B	B	B	A	A	B	-	B	B	B	A	A	A	A	B	B	A	A	A	B
IWB36242	IACX7801	6A	9.52928	B	B	A	B	B	B	B	B	A	A	A	B	A	A	B	A	B	B	B	A	A	A	A	A	B	B	B	B	B	A	A	B	-	B	B	B	A	A	A	A	B	B	A	A	A	B
IWB71873	Tdurum_contig48179_1051	6A	9.52928	B	B	A	B	B	B	B	B	A	A	A	B	A	A	B	A	B	B	B	A	A	A	A	A	B	B	B	B	B	A	A	B	-	B	B	B	A	A	A	A	B	B	A	A	A	B
IWA6630	wsnp_Ku_c17618_26749729	6A	9.52928	B	B	A	B	B	B	B	B	A	A	A	-	A	A	B	A	B	B	B	A	A	A	A	A	B	B	B	B	B	A	A	B	-	B	B	B	A	A	A	A	B	B	A	A	A	B
IWB44659	Kukri_c37241_513	6A	9.52928	B	B	A	B	B	B	B	B	A	A	A	B	A	A	B	A	B	B	B	A	A	A	A	A	B	B	B	B	B	A	A	B	-	B	B	B	A	A	A	A	B	B	A	A	A	B
IWA2018	wsnp_Ex_c15378_23639387	6A	24.8981	B	B	A	B	B	B	B	B	A	A	B	A	B	A	A	B	B	A	A	A	A	A	A	A	B	B	B	B	B	A	A	A	A	A	B	B	A	A	A	A	-	B	A	B	A	B
IWB36506	Jagger_c2853_75	6A	25.2604	B	B	A	B	B	B	B	B	A	A	B	A	B	A	A	B	B	A	A	A	A	A	A	A	B	B	B	B	B	A	A	A	A	A	B	B	A	A	A	A	A	B	A	B	A	B
IWB21588	Excalibur_c10263_218	6A	26.7314	B	B	A	B	B	A	A	A	A	A	B	A	B	A	A	B	B	A	A	A	A	A	A	A	B	B	B	B	B	A	A	A	A	A	B	B	A	A	A	A	A	B	A	B	A	B
IWB73282	Tdurum_contig7557_723	6A	27.4613	B	B	A	B	B	A	A	A	A	A	B	A	B	A	A	B	B	A	A	A	A	A	A	A	B	B	B	B	B	A	A	A	A	A	B	B	A	A	A	A	A	B	A	B	A	B
IWB58592	RAC875_c49875_405	6A	31.4062	B	B	B	B	B	A	A	A	A	A	B	A	B	A	A	B	B	A	A	A	A	A	A	A	B	B	B	B	B	A	B	A	A	A	B	B	A	A	A	A	A	A	A	B	A	B
IWB72426	Tdurum_contig55124_310	6A	31.7633	B	B	B	B	B	A	A	A	A	A	B	B	B	A	A	B	B	A	A	A	A	A	A	A	B	B	B	B	B	A	B	A	A	A	B	B	A	A	A	A	A	A	A	B	A	B
IWB68523	Tdurum_contig16290_156	6A	31.7633	B	B	B	B	B	A	A	A	A	A	B	B	B	A	A	B	B	A	A	A	A	A	A	A	B	B	B	B	B	A	B	A	-	A	B	B	A	A	A	A	A	A	A	B	A	B
IWB11102	BS00079942_51	6A	31.7633	B	B	B	B	B	A	A	A	A	A	B	B	B	A	A	B	B	A	A	A	A	A	A	A	B	B	B	B	B	A	B	A	-	A	B	B	A	A	A	A	A	A	A	B	A	B
IWA1874	wsnp_Ex_c14192_22135363	6A	31.7633	B	B	B	B	B	A	A	A	A	A	B	B	B	A	A	B	B	A	A	A	A	A	A	A	B	B	B	B	B	A	B	A	-	A	B	B	A	A	A	A	A	A	A	B	A	B
IWA5238	wsnp_Ex_rep_c66433_64661643	6A	31.7633	B	B	B	B	B	A	A	A	A	A	B	B	B	A	A	B	B	A	A	A	A	A	A	A	B	B	B	B	B	A	B	A	-	A	B	B	A	A	A	A	A	A	A	B	A	B
IWB10234	BS00068106_51	6A	31.7633	B	B	B	B	B	A	A	A	A	A	B	B	B	A	A	B	B	A	A	A	A	A	A	A	B	B	B	B	B	A	B	A	-	A	B	B	A	A	A	A	A	A	A	B	A	B
IWB73616	Tdurum_contig83190_441	6A	31.7633	B	B	B	B	B	A	A	A	A	A	B	B	B	A	A	B	B	A	A	A	A	A	A	A	B	B	B	B	B	A	B	A	-	A	B	B	A	A	A	A	A	A	A	B	A	B
IWA2686	wsnp_Ex_c22089_31270140	6A	32.4828	B	B	B	B	B	A	A	A	A	A	B	B	B	A	A	B	B	A	A	A	A	A	A	A	B	B	B	B	B	A	B	A	-	A	B	B	A	A	A	A	A	A	A	B	A	B
IWB6851	BS00021999_51	6A	32.4828	B	B	B	B	B	A	A	A	A	A	B	B	B	A	A	B	B	A	A	A	A	A	A	A	B	B	B	B	B	A	B	A	-	A	B	B	A	A	A	A	A	A	A	B	A	B
IWB63546	RFL_Contig1038_942	6A	32.4828	B	B	B	B	B	A	A	A	A	A	B	B	B	A	A	B	B	A	A	A	A	A	A	A	B	B	B	B	B	A	B	A	-	A	B	B	A	A	A	A	A	A	A	B	A	B
IWB11680	BS00090928_51	6A	32.4828	B	B	B	B	B	A	A	A	A	A	B	B	B	A	A	B	B	A	A	A	A	A	A	A	B	B	B	B	B	A	B	A	-	A	B	B	A	A	A	A	A	A	A	B	A	B
IWB47355	Kukri_c67_1504	6A	33.5858	B	B	B	B	B	A	A	A	A	A	B	B	B	A	A	B	B	A	A	A	A	A	A	A	B	B	B	B	B	A	B	A	-	A	B	B	A	A	A	A	A	A	A	B	A	B
IWA3670	wsnp_Ex_c3913_7100986	6A	33.5858	B	B	B	B	B	A	A	A	A	A	B	B	B	A	A	B	B	A	A	A	A	A	A	A	B	B	B	B	B	A	B	A	-	A	B	B	A	A	A	A	A	A	A	B	A	B
IWA3495	wsnp_Ex_c3472_6358437	6A	33.5858	B	B	B	B	B	A	A	A	A	A	B	B	B	A	A	B	B	A	A	A	A	A	A	A	B	B	B	B	B	A	B	A	-	A	B	B	A	A	A	A	A	A	A	B	A	B
IWB6293	BS00010811_51	6A	33.9379	B	B	B	B	B	A	A	A	A	A	B	B	B	A	A	B	B	A	A	A	A	A	A	A	B	B	B	B	B	A	B	A	-	A	B	B	A	A	A	A	A	A	A	B	A	B
IWB72208	Tdurum_contig51717_1582	6A	33.9379	B	B	B	B	B	A	A	A	A	A	B	B	B	A	A	B	B	A	A	A	A	A	A	A	B	B	B	B	B	A	B	A	-	A	B	B	A	A	A	A	A	A	A	B	A	B
IWB9852	BS00066636_51	6A	37.3264	B	B	B	B	B	A	A	A	A	A	B	B	B	A	A	B	B	A	A	A	A	A	A	A	B	B	B	B	B	A	B	A	B	A	B	B	A	A	A	A	A	A	A	B	A	B
IWA5041	wsnp_Ex_rep_c102011_87270703	6A	38.7351	B	B	B	B	B	A	A	A	A	A	B	B	B	A	A	B	B	A	A	A	A	A	A	A	B	B	B	B	B	A	B	A	B	A	B	B	A	A	A	A	A	A	A	B	A	B
IWB40054	Ku_c8125_1049	6A	38.7351	B	B	B	B	B	A	A	A	A	A	B	B	B	A	A	B	B	A	A	A	A	A	A	A	B	B	B	B	B	A	B	A	B	A	B	B	A	A	A	A	A	A	A	B	A	B
IWA2249	wsnp_Ex_c17692_26437459	6A	38.7351	B	B	B	B	B	A	A	A	A	A	B	B	B	A	A	B	B	A	A	A	A	A	A	A	B	B	B	B	B	A	B	A	B	A	B	B	A	A	A	A	A	A	A	B	A	B
IWA7659	wsnp_Ra_c16745_25482384	6A	38.7351	B	B	B	B	B	A	A	A	A	A	B	B	B	A	A	B	B	A	A	A	A	A	A	A	B	B	B	B	B	A	B	A	B	A	B	B	A	A	A	A	A	A	A	B	A	B
IWB34635	IAAV2924	6A	40.9262	B	B	A	B	B	A	A	A	A	A	B	B	B	A	A	B	A	A	A	A	A	A	A	A	B	B	B	B	B	A	B	A	B	A	B	B	A	A	A	A	A	A	A	B	A	B
IWB52666	Ra_c77116_338	6A	40.9262	B	B	A	B	B	A	A	A	A	A	B	B	B	A	A	B	A	A	A	A	A	A	A	A	B	B	B	B	B	A	B	A	B	A	B	B	A	A	A	A	A	A	A	B	A	B
IWB52665	Ra_c77116_279	6A	40.9262	B	B	A	B	B	A	A	A	A	A	B	B	B	A	A	B	A	A	A	A	A	A	A	A	B	B	B	B	B	A	B	A	B	A	B	B	A	A	A	A	A	A	A	B	A	B
IWB35130	IAAV6004	6A	40.9262	B	B	A	B	B	A	A	A	A	A	B	B	B	A	A	B	A	A	A	A	A	A	A	A	B	B	B	B	B	A	B	A	B	A	B	B	A	A	A	A	A	A	A	B	A	B
IWB7420	BS00023089_51	6A	40.9262	B	B	A	B	B	A	A	A	A	A	B	B	B	A	A	B	A	A	A	A	A	A	A	A	B	B	B	B	B	A	B	A	B	A	B	B	A	A	A	A	A	A	A	B	A	B
IWB10321	BS00068469_51	6A	40.9262	B	B	A	B	B	A	A	A	A	A	B	B	B	A	A	B	A	A	A	A	A	A	A	A	B	B	B	B	B	A	B	A	B	A	B	B	A	A	A	A	A	A	A	B	A	B
IWA7438	wsnp_Ku_rep_c68351_67302372	6A	40.9262	B	B	A	B	B	A	A	A	A	A	B	B	B	A	A	B	A	A	A	A	A	A	A	A	B	B	B	B	B	A	B	A	B	A	B	B	A	A	A	A	A	A	A	B	A	B
IWB51879	Ra_c33862_243	6A	40.9262	B	B	A	B	B	A	A	A	A	A	B	B	B	A	A	B	A	A	A	A	A	A	A	A	B	B	B	B	B	A	B	A	B	A	B	B	A	A	A	A	A	A	A	B	A	B
IWA1498	wsnp_Ex_c11446_18468102	6A	40.9262	B	B	A	B	B	A	A	A	A	A	B	B	B	A	A	B	A	A	A	A	A	A	A	A	B	B	B	B	B	A	B	A	B	A	B	B	A	A	A	A	A	A	A	B	A	B
IWB39921	Ku_c71238_1537	6A	40.9262	B	B	A	B	B	A	A	A	A	A	B	B	B	A	A	B	A	A	A	A	A	A	A	A	B	B	B	B	B	A	B	A	B	A	B	B	A	A	A	A	A	A	A	B	A	B
IWB9444	BS00065079_51	6A	40.9262	B	B	A	B	B	A	A	A	A	A	B	B	B	A	A	B	A	A	A	A	A	A	A	A	B	B	B	B	B	A	B	A	B	A	B	B	A	A	A	A	A	A	A	B	A	B
IWB7526	BS00024191_51	6A	40.9262	B	B	A	B	B	A	A	A	A	A	B	B	B	A	A	B	A	A	A	A	A	A	A	A	B	B	B	B	B	A	B	A	B	A	B	B	A	A	A	A	A	A	A	B	A	B
IWB20844	Ex_c50864_326	6A	40.9262	B	B	A	B	B	A	A	A	A	A	B	B	B	A	A	B	A	A	A	A	A	A	A	A	B	B	B	B	B	A	B	A	B	A	B	B	A	A	A	A	A	A	A	B	A	B
IWB34375	IAAV1385	6A	40.9262	B	B	A	B	B	A	A	A	A	A	B	B	B	A	A	B	A	A	A	A	A	A	A	A	B	B	B	B	B	A	B	A	B	A	B	B	A	A	A	A	A	A	A	B	A	B
IWB5437	BobWhite_rep_c64054_499	6A	40.9262	B	B	A	B	B	A	A	A	A	A	B	B	B	A	A	B	A	A	A	A	A	A	A	A	B	B	B	B	B	A	B	A	B	A	B	B	A	A	A	A	A	A	A	B	A	B
IWA7323	wsnp_Ku_c8394_14267750	6A	40.9262	B	B	A	B	B	A	A	A	A	A	B	B	B	A	A	B	A	A	A	A	A	A	A	A	B	B	B	B	B	A	B	A	B	A	B	B	A	A	A	A	A	A	A	B	A	B
IWB52222	Ra_c5250_567	6A	41.6207	B	B	A	B	B	A	A	A	A	A	B	B	B	A	A	B	A	B	A	A	A	A	A	A	B	B	B	B	B	A	B	A	B	A	B	B	A	A	A	A	A	A	A	B	A	B
IWB11029	BS00078715_51	6A	41.6207	B	B	A	B	B	A	A	A	A	A	B	B	B	A	A	B	A	B	A	A	A	A	A	A	B	B	B	B	B	A	B	A	B	A	B	B	A	A	A	A	A	A	A	B	A	B
IWA5143	wsnp_Ex_rep_c105612_89983181	6A	41.6207	B	B	A	B	B	A	A	A	A	A	B	B	B	A	A	B	A	B	A	A	A	A	A	A	B	B	B	B	B	A	B	A	B	A	B	B	A	A	A	A	A	A	A	B	A	B
IWB9334	BS00064632_51	6A	41.6207	B	B	A	B	B	A	A	A	A	A	B	B	B	A	A	B	A	B	A	A	A	A	A	A	B	B	B	B	B	A	B	A	B	A	B	B	A	A	A	A	A	A	A	B	A	B
IWB12672	CAP11_c1206_301	6A	42.3453	B	B	A	B	B	-	A	A	A	A	B	-	B	A	A	B	A	-	A	A	A	A	A	A	B	B	B	B	B	A	B	B	B	A	B	B	A	A	A	A	A	A	A	B	A	B
IWB8932	BS00062823_51	6A	42.705	B	B	A	B	B	A	A	A	A	A	B	B	B	A	A	B	A	B	A	A	A	A	A	A	B	B	B	B	B	A	B	B	B	A	B	B	A	A	A	A	A	A	A	B	A	B
IWB25475	Excalibur_c34574_452	6A	42.705	B	B	A	B	B	A	A	A	A	-	B	B	B	A	A	B	A	B	A	A	A	A	A	A	B	B	B	B	B	A	B	B	B	A	B	B	A	A	A	A	A	A	A	B	A	B
IWB73438	Tdurum_contig78006_158	6A	42.705	B	B	A	B	B	A	A	A	A	A	B	B	B	A	A	B	A	B	A	A	A	A	A	A	B	B	B	B	B	A	B	B	B	A	B	B	A	A	A	A	A	A	A	B	A	B
IWB72306	Tdurum_contig53138_302	6A	43.0596	B	B	A	B	B	A	A	A	A	A	B	B	B	A	A	B	A	B	A	A	A	A	A	A	B	B	B	B	B	A	B	B	B	A	B	B	A	A	A	B	A	A	A	B	A	B
IWB35333	IAAV7384	6A	43.0596	B	B	A	B	B	A	A	A	A	A	B	B	B	A	A	-	A	B	A	A	A	A	A	A	B	B	B	B	B	A	B	B	B	A	B	B	A	A	A	B	A	A	A	B	A	B
IWB73642	Tdurum_contig83570_288	6A	48.155	B	B	A	B	B	A	A	A	A	A	B	B	B	A	A	B	A	B	A	A	A	A	B	B	B	B	B	A	B	A	B	B	B	A	B	B	B	A	A	B	A	A	A	B	A	B
IWA399	wsnp_BE607043A_Td_2_1	6A	48.8849	B	B	A	B	B	A	A	A	A	A	B	B	B	A	A	B	A	B	A	A	A	A	B	B	B	B	B	A	B	A	B	B	B	B	B	B	B	A	A	B	A	A	-	B	A	B
IWB33567	GENE-3709_393	6A	48.8849	B	B	A	B	B	A	A	A	A	-	B	B	B	A	A	B	A	B	A	A	A	A	B	B	B	B	B	A	B	A	B	B	B	B	B	B	B	A	A	B	A	A	-	B	A	B
IWB36195	IACX7439	6A	49.988	B	B	A	B	B	A	A	A	A	A	B	B	B	A	A	B	A	-	A	A	A	A	B	B	B	B	B	A	B	A	B	B	B	B	B	B	B	A	A	B	A	A	-	B	A	B
IWB10186	BS00067934_51	6A	49.988	B	B	A	B	B	A	A	A	A	A	B	B	B	A	A	B	A	B	A	A	A	A	B	B	B	B	B	A	B	A	B	B	B	B	B	B	B	A	A	B	A	A	-	B	A	B
IWB9763	BS00066274_51	6A	49.988	B	B	A	B	B	A	A	A	A	A	B	B	B	A	A	B	A	B	A	A	A	A	B	B	B	B	B	A	B	A	B	B	B	B	B	-	B	A	A	B	A	A	-	B	A	B
IWA6247	wsnp_JD_rep_c48797_33040150	6A	52.2115	B	B	A	B	B	A	A	A	A	A	B	B	B	A	A	B	A	B	A	A	A	A	B	B	B	B	B	A	B	A	B	B	B	B	B	B	B	A	A	B	A	A	-	B	A	B
IWB9600	BS00065633_51	6A	52.2115	B	B	A	B	B	A	A	A	A	A	B	B	B	A	A	B	A	B	A	A	A	A	B	B	B	B	B	A	B	A	B	B	B	B	B	B	B	A	A	B	A	A	-	B	A	B
IWB5996	BS00005019_51	6A	52.5687	B	B	A	B	B	A	A	A	A	A	B	B	B	A	A	B	A	B	A	A	A	A	B	B	B	B	B	A	B	A	B	B	B	B	B	B	B	A	A	B	A	A	-	B	A	B
IWA6724	wsnp_Ku_c22358_32187765	6A	52.5687	B	B	A	B	B	A	A	A	A	A	B	B	B	A	A	B	A	B	A	A	A	A	B	B	B	B	B	A	B	A	B	B	B	B	B	B	B	A	A	B	A	A	-	B	A	B
IWB1926	BobWhite_c2568_115	6A	52.9208	B	B	A	B	B	-	A	A	A	-	B	B	B	A	A	B	A	B	A	A	A	A	B	B	B	B	B	A	B	A	B	B	B	B	B	B	B	A	A	B	A	A	-	B	A	B
IWB10738	BS00074432_51	6A	53.2754	B	B	A	B	B	A	A	A	A	A	B	B	B	A	A	B	A	B	A	A	A	A	B	B	B	B	B	A	B	A	B	B	B	B	B	B	B	A	A	B	A	A	-	B	A	B
IWA38	wsnp_BE403818A_Ta_2_1	6A	53.625	B	B	A	B	B	A	A	A	A	A	B	B	B	A	A	B	A	B	A	A	A	A	B	B	B	B	B	A	B	A	B	B	B	B	B	B	B	A	A	B	A	A	B	B	A	B
IWB36100	IACX6046	6A	53.625	B	B	A	B	B	A	A	A	A	A	B	B	B	A	A	B	A	B	A	A	A	A	B	B	B	B	B	A	B	A	B	B	B	B	B	B	B	A	A	B	A	A	B	B	A	B
IWA5459	wsnp_Ex_rep_c67819_66516786	6A	54.3243	B	B	A	B	B	A	A	A	A	A	B	B	B	A	B	B	A	B	A	A	A	A	B	B	B	B	B	A	B	A	B	B	B	B	B	B	B	A	A	B	A	A	B	B	A	B
IWA6938	wsnp_Ku_c3450_6387847	6A	55.3808	B	A	A	B	B	A	A	A	A	A	B	B	B	A	B	B	A	B	A	A	A	A	B	B	B	B	B	A	B	A	B	B	B	B	B	B	B	A	A	B	A	A	B	B	A	B
IWA224	wsnp_BE490226A_Ta_2_2	6A	56.4372	B	A	A	B	B	A	A	A	A	A	B	B	B	A	B	B	A	B	A	A	A	A	B	B	B	B	B	A	B	A	B	B	B	B	B	B	B	A	A	B	A	A	B	B	A	B
IWB10600	BS00072216_51	6A	56.7844	B	A	A	B	B	A	A	A	A	A	B	B	B	A	B	B	A	B	A	A	A	A	B	B	B	B	B	A	B	A	B	B	B	B	B	B	B	A	A	B	A	A	B	B	A	B
IWB5338	BobWhite_rep_c63152_444	6A	57.4789	B	A	A	B	B	A	A	A	A	A	B	B	B	A	B	B	A	B	A	A	A	A	B	B	B	B	A	A	B	A	B	B	B	B	B	B	B	A	A	B	A	A	B	B	A	B
IWB13180	CAP12_c118_95	6A	57.8237	B	A	A	B	B	A	A	A	A	A	B	B	B	A	B	B	A	B	A	A	A	A	B	B	B	B	A	A	B	A	B	B	B	B	B	B	B	A	A	B	A	A	B	B	A	B
IWB7513	BS00023893_51	6A	59.6229	B	A	A	B	B	A	A	A	A	A	B	B	B	A	B	B	A	B	A	A	A	A	B	B	B	B	A	A	B	A	B	A	B	B	B	B	B	A	A	B	A	A	B	B	A	B
IWB72803	Tdurum_contig61574_645	6A	62.6114	B	A	A	B	B	A	A	A	A	A	B	B	B	A	B	B	A	B	A	B	A	A	B	B	B	B	A	A	B	A	B	A	B	B	B	B	B	A	B	B	A	A	B	B	A	B
IWA8431	wsnp_RFL_Contig3136_3092151	6A	62.6114	B	A	A	B	B	A	A	A	A	A	B	B	B	A	B	B	A	B	A	B	A	A	B	B	B	B	A	A	B	A	B	A	B	B	B	B	B	A	B	B	A	A	B	B	A	B
IWA654	wsnp_CAP11_c1178_684471	6A	62.6114	B	A	A	B	B	A	A	A	A	A	B	B	B	A	B	B	A	B	A	B	A	A	B	B	B	B	A	A	B	A	B	A	B	B	B	B	B	A	B	B	A	A	B	B	A	B
IWB69933	Tdurum_contig29974_90	6A	62.6114	B	A	A	B	B	A	A	A	A	A	B	B	B	A	B	B	A	B	A	B	A	A	B	B	B	B	A	A	B	A	B	A	B	B	B	B	B	A	B	B	A	A	B	B	A	B
IWA992	wsnp_CAP12_c928_486444	6A	62.6114	B	A	A	B	B	A	A	A	A	A	B	B	B	A	B	B	A	B	A	B	A	A	B	B	B	B	A	A	B	A	B	A	B	B	B	B	B	A	B	B	A	A	B	B	A	B
IWB53065	RAC875_c104548_369	6A	62.6114	B	A	A	B	B	A	A	A	A	A	B	B	B	A	B	B	A	B	A	B	A	A	B	B	B	B	A	A	B	A	B	A	B	B	B	B	B	A	B	B	A	A	B	B	A	B
IWB72440	Tdurum_contig55363_297	6A	62.6114	B	A	A	B	B	A	A	A	A	A	B	B	B	A	B	B	A	B	A	B	A	A	B	B	B	B	A	A	B	A	B	A	B	B	B	B	B	A	B	B	A	A	B	B	A	B
IWB73137	Tdurum_contig69065_319	6A	62.6114	B	A	A	B	B	A	A	A	A	A	B	B	B	A	B	B	A	B	A	B	A	A	B	B	B	B	A	A	B	A	B	A	B	B	B	B	B	A	B	B	A	A	B	B	A	B
IWB11206	BS00081699_51	6A	62.6114	B	A	A	B	B	A	A	A	A	A	B	B	B	A	B	B	A	B	A	B	A	A	B	B	B	B	A	A	B	A	B	A	B	B	B	B	B	A	B	B	A	A	B	B	A	B
IWB8308	BS00042195_51	6A	62.6114	B	A	A	B	B	A	A	A	A	A	B	B	B	A	B	B	A	B	A	B	A	A	B	B	B	B	A	A	B	A	B	A	B	B	B	B	B	A	B	B	A	A	B	B	A	B
IWB34819	IAAV4068	6A	62.6114	B	A	A	B	B	A	A	A	A	A	B	B	B	A	B	B	A	B	A	B	A	A	B	B	B	B	A	A	B	A	B	A	B	B	B	B	B	A	B	B	A	A	B	B	A	B
IWB41325	Kukri_c15096_4174	6A	62.6114	B	A	A	B	B	A	A	A	A	A	B	B	B	A	B	B	A	B	A	B	A	A	B	B	B	B	A	A	B	A	B	A	B	B	B	B	B	A	B	B	A	A	B	B	A	B
IWB41326	Kukri_c15096_4206	6A	62.6114	B	A	A	B	B	A	A	A	A	A	B	B	B	A	B	B	A	B	A	B	A	A	B	B	B	B	A	A	B	A	B	A	B	B	B	B	B	A	B	B	A	A	B	B	A	B
IWB8212	BS00040166_51	6A	63.3107	B	A	A	B	B	A	A	A	A	A	B	B	B	A	B	B	A	B	A	B	A	A	B	B	B	B	A	A	B	A	B	A	B	B	B	B	B	A	B	B	A	A	B	B	A	B
IWB8211	BS00040165_51	6A	63.3107	B	A	A	B	B	A	A	A	A	A	B	B	B	A	B	B	A	B	A	B	A	A	B	B	B	B	A	A	B	A	B	A	B	B	B	B	B	A	B	B	A	A	B	B	A	B
IWB40509	Kukri_c11073_954	6A	64.3671	B	A	A	B	B	A	A	A	A	A	B	A	B	A	B	B	B	B	A	B	A	A	B	B	B	B	A	A	B	A	B	A	B	B	B	B	B	A	B	B	A	A	B	B	A	B
IWB73414	Tdurum_contig77175_248	6A	64.3671	B	A	A	B	B	A	A	A	A	A	B	A	B	A	B	B	B	B	A	B	A	A	B	B	B	B	A	A	B	A	B	A	B	B	B	B	B	A	B	B	A	A	B	B	A	B
IWB73413	Tdurum_contig77175_150	6A	64.3671	B	A	A	B	B	A	A	A	A	A	B	A	B	A	B	B	B	B	A	B	A	A	B	B	B	B	A	A	B	A	B	A	B	B	B	B	B	A	B	B	A	A	B	B	A	B
IWA260	wsnp_BE495143A_Ta_2_2	6A	68.1621	B	A	A	B	A	A	A	A	A	A	B	A	B	A	B	B	B	B	A	B	A	A	B	B	B	B	A	A	B	A	B	A	B	B	B	B	B	A	B	A	A	A	B	A	A	B
IWB71891	Tdurum_contig48420_654	6A	68.1621	B	A	A	B	A	A	A	A	A	A	B	A	B	A	B	B	B	B	A	B	A	A	B	B	B	B	A	A	B	A	B	A	B	B	B	B	B	A	B	A	A	A	B	A	A	B
IWB72393	Tdurum_contig54796_1427	6A	68.5117	B	A	A	B	A	A	A	A	A	A	B	A	B	A	B	B	B	B	A	B	A	A	B	B	B	B	A	A	B	A	B	A	B	B	B	B	B	A	B	A	A	A	B	A	A	B
IWA3491	wsnp_Ex_c34641_42914170	6A	68.5117	B	A	A	B	A	A	A	A	A	A	B	A	B	A	B	B	B	B	A	B	A	A	B	B	B	B	A	A	B	A	B	A	B	B	B	B	B	A	B	A	A	A	B	A	A	B
IWB199	BobWhite_c1131_328	6A	73.2127	B	A	A	B	A	A	A	A	A	A	B	A	B	A	B	B	B	B	A	B	A	A	B	B	B	B	A	B	B	A	B	A	B	B	B	B	A	B	B	A	A	A	B	A	A	B
IWB65466	TA001855-0472	6A	73.5673	B	A	A	B	A	A	A	A	A	A	B	A	B	A	B	B	B	B	A	B	A	A	B	B	B	B	A	B	B	A	B	A	B	B	B	B	A	B	B	A	A	A	B	A	A	B
IWB68272	Tdurum_contig14676_637	6A	74.2868	B	A	A	B	A	A	A	A	A	A	B	B	B	A	B	B	B	B	A	B	A	A	B	B	B	B	A	B	B	A	B	A	B	B	B	B	A	B	B	A	A	A	B	A	A	B
IWB69770	Tdurum_contig29357_338	6A	78.6627	B	B	A	B	A	-	A	A	A	A	B	B	B	A	B	B	B	B	A	B	A	A	B	B	B	B	B	B	B	A	B	A	B	B	B	B	A	B	B	A	A	A	B	A	B	B
IWB61092	RAC875_c93959_96	6A	79.025	B	B	A	B	A	A	A	A	A	A	B	B	B	A	B	B	B	B	A	B	A	A	B	B	B	B	B	B	B	A	B	A	B	B	B	B	A	B	B	A	A	A	B	A	B	B
IWB12055	BS00099074_51	6A	80.8242	B	B	A	B	A	A	A	A	A	B	B	B	B	A	B	B	A	B	A	B	A	A	B	B	B	B	B	B	B	A	B	A	B	B	B	B	A	B	B	A	A	A	B	A	B	B
IWB51908	Ra_c3533_880	6A	81.1763	B	B	A	B	A	A	A	A	A	B	B	B	B	A	B	B	A	B	A	B	A	A	B	B	B	B	B	B	B	A	B	A	B	B	B	B	A	B	B	A	A	A	B	A	B	B
IWA2539	wsnp_Ex_c20457_29526403	6A	81.1763	B	B	A	B	A	A	A	A	A	B	B	B	B	A	B	B	A	B	A	B	A	A	B	B	B	B	B	B	B	A	B	A	B	B	B	B	A	B	B	A	A	A	B	A	B	B
IWA5035	wsnp_Ex_rep_c101766_87073440	6A	82.2479	B	B	A	B	A	A	A	A	A	B	B	B	B	A	B	B	A	B	A	B	A	A	B	B	B	B	B	B	B	A	B	A	B	B	A	A	A	B	B	A	A	A	B	A	B	B
IWB46659	Kukri_c57452_1040	6A	82.2479	B	B	A	B	A	A	A	A	A	B	B	B	B	A	B	B	A	B	A	B	A	A	B	B	B	B	B	B	B	A	B	A	B	B	A	A	A	B	B	A	A	A	B	A	B	B
IWA5398	wsnp_Ex_rep_c67436_66026057	6A	82.2479	B	B	A	B	A	A	A	A	A	B	B	B	B	A	B	B	A	B	A	B	A	A	B	B	B	B	B	B	B	A	B	A	B	B	A	A	A	B	B	A	A	A	B	A	B	B
IWB63713	RFL_Contig1715_631	6A	82.2479	B	B	A	B	A	A	A	A	A	B	B	B	B	A	B	B	A	B	A	B	A	A	B	-	B	B	B	B	B	A	B	A	B	B	A	A	A	B	B	A	A	A	B	A	B	B
IWB71707	Tdurum_contig46670_1680	6A	85.2142	B	B	A	B	B	A	A	A	A	B	B	B	B	A	B	B	A	B	A	B	A	A	B	-	B	B	B	A	B	A	B	A	B	B	A	A	A	B	B	B	A	A	B	A	B	B
IWA4603	wsnp_Ex_c7002_12063380	6A	86.2559	B	B	A	B	B	A	A	A	A	B	B	B	B	A	A	B	A	B	A	B	A	A	B	-	B	B	B	A	B	A	B	A	B	B	A	A	A	B	B	B	A	A	B	A	B	B
IWB5419	BobWhite_rep_c63956_254	6A	86.9504	B	B	A	B	B	A	A	A	A	B	B	B	B	A	A	B	A	B	A	B	A	A	B	-	B	B	B	B	B	A	B	A	B	B	A	A	A	B	B	B	A	A	B	A	B	B
IWB58463	RAC875_c48687_681	6A	88.3691	B	B	A	B	B	A	A	A	A	B	B	B	B	B	A	B	A	B	A	B	A	A	B	-	B	B	B	B	B	A	B	A	B	B	A	A	A	B	B	B	A	A	B	A	B	B
IWB71956	Tdurum_contig49206_350	6A	94.9964	B	B	B	B	B	A	A	A	A	B	A	B	B	B	A	B	A	B	A	B	A	A	A	A	B	B	B	B	A	A	B	A	B	B	A	A	A	B	A	B	A	A	B	A	B	B
IWB73478	Tdurum_contig8071_567	6A	99.7902	B	B	B	B	B	A	A	A	B	B	B	B	B	B	B	B	A	B	A	B	A	A	A	A	B	B	B	B	A	A	A	A	B	B	A	A	A	B	B	B	A	A	B	A	B	B
IWB31243	Excalibur_rep_c75101_108	6A	100.13	B	B	B	B	B	A	A	A	B	B	B	B	B	B	B	B	A	B	A	B	A	A	A	A	B	B	B	B	A	A	A	B	B	B	A	A	A	B	B	B	A	A	B	A	B	B
IWB33839	GENE-4208_788	6A	100.82	B	B	B	B	B	A	A	A	B	B	B	B	B	B	B	B	A	B	A	B	A	B	A	A	B	B	B	B	A	A	A	B	B	B	A	A	A	B	B	B	A	A	B	A	B	B
IWB59857	RAC875_c6429_55	6A	102.632	B	B	B	B	B	A	A	A	B	B	B	B	B	B	-	B	A	B	A	B	A	B	A	A	B	B	B	B	A	A	A	B	B	B	A	A	A	B	B	B	B	A	B	A	B	B
IWB12763	CAP11_c2234_240	6A	102.632	B	B	B	B	B	-	A	A	B	B	B	B	B	B	B	B	A	B	A	B	A	B	A	A	B	B	B	B	-	A	A	B	B	B	A	A	A	B	B	B	B	A	B	A	B	B
IWB8311	BS00042200_51	6A	102.632	B	B	B	B	B	A	A	A	B	B	B	B	B	B	-	B	A	B	A	B	A	B	A	A	B	B	B	B	A	A	A	B	B	B	A	A	A	B	B	B	B	A	B	A	B	B
IWB10911	BS00077044_51	6A	102.632	B	B	B	B	B	A	A	A	B	B	B	B	B	B	-	B	A	B	A	B	A	B	A	A	B	B	B	B	A	A	A	B	B	B	A	A	A	B	B	B	B	A	B	A	B	B
IWB44475	Kukri_c3570_1418	6A	106.046	B	B	B	B	B	-	A	A	B	B	A	B	B	B	A	B	A	B	A	B	A	B	A	A	B	B	B	A	A	A	A	B	B	B	A	A	A	B	B	B	B	A	B	A	B	B
IWB10829	BS00075751_51	6B	0	A	A	B	B	A	A	A	A	A	B	A	B	A	B	B	B	A	A	B	A	A	B	B	B	B	B	A	B	A	-	A	A	B	B	A	A	B	B	B	B	A	A	A	A	A	B
IWB63325	RAC875_rep_c94503_152	6B	1.05644	A	A	B	B	A	A	A	A	A	B	A	B	A	B	B	B	A	A	B	A	A	B	B	B	B	B	A	B	A	-	A	A	B	B	A	A	B	B	B	B	A	A	A	A	A	B
IWB8657	BS00055174_51	6B	1.05644	A	A	B	B	A	A	A	A	A	B	A	B	A	B	B	B	A	A	B	A	A	B	B	B	B	B	A	B	A	-	A	A	B	B	A	A	B	B	B	B	A	A	A	A	A	B
IWB3282	BobWhite_c43135_397	6B	1.40126	A	A	B	B	A	A	A	A	A	B	A	B	A	B	A	B	A	A	B	A	A	B	B	B	B	B	A	B	A	-	A	A	B	B	A	A	B	B	B	B	A	A	A	A	A	B
IWB70714	Tdurum_contig41996_1823	6B	1.74371	A	A	A	B	A	A	A	A	A	B	A	B	A	B	A	B	A	A	B	A	A	B	B	B	B	B	A	B	A	B	A	A	B	B	A	A	B	B	B	B	A	A	A	A	A	B
IWA6759	wsnp_Ku_c24391_34351602	6B	3.98389	B	A	A	B	A	-	A	A	A	-	A	B	A	B	A	B	A	A	B	A	A	B	B	B	B	B	A	B	A	-	A	A	B	B	A	A	B	B	B	B	A	A	A	A	-	B
IWA666	wsnp_CAP11_c1355_767877	6B	4.37147	B	A	A	B	A	A	A	A	A	B	B	B	A	B	A	B	A	A	B	A	A	B	B	B	B	B	A	B	A	-	A	A	B	B	A	A	B	B	B	B	A	A	A	A	-	B
IWB4662	BobWhite_c9804_305	6B	4.37147	B	A	A	B	A	A	A	A	A	B	B	B	A	B	A	B	A	A	B	-	A	-	-	B	B	B	A	B	A	-	A	A	B	B	A	A	B	B	B	B	A	A	A	A	-	B
IWB71329	Tdurum_contig42655_1256	6B	4.37147	B	A	A	B	A	A	A	A	A	B	B	B	A	B	A	B	A	A	B	-	A	B	-	B	B	B	A	B	A	-	A	A	B	B	A	A	B	B	B	B	A	A	A	A	-	B
IWA4633	wsnp_Ex_c7191_12352173	6B	13.1557	B	A	A	B	B	B	B	B	A	B	B	B	A	B	B	B	A	A	B	A	A	B	B	B	B	B	A	A	A	B	A	A	B	B	A	A	B	A	B	A	A	A	A	B	B	A
IWB52739	Ra_c8396_465	6B	13.855	B	A	A	B	B	B	B	B	A	-	B	B	A	B	B	B	A	A	B	A	A	B	B	B	B	B	A	A	A	B	A	A	B	B	A	A	B	A	B	A	A	A	A	B	B	B
IWB52738	Ra_c8396_464	6B	13.855	B	A	A	B	B	-	B	B	A	B	B	B	A	B	B	B	A	A	B	A	A	B	B	B	B	B	A	A	A	B	A	A	B	B	A	A	B	A	B	A	A	A	A	B	B	B
IWA4612	wsnp_Ex_c702_1383612	6B	14.2096	B	A	B	B	B	B	B	B	A	B	B	B	A	B	B	B	A	A	B	A	A	B	B	B	B	B	A	A	A	B	A	A	B	B	A	A	B	A	B	A	A	A	A	B	B	B
IWA4610	wsnp_Ex_c702_1382859	6B	14.2096	B	A	B	B	B	B	B	B	A	B	B	B	A	B	B	B	A	A	B	A	A	B	B	B	B	B	A	A	A	B	A	A	B	B	A	A	B	A	B	A	A	A	A	B	B	B
IWA3991	wsnp_Ex_c4728_8444212	6B	14.2096	B	A	B	B	B	B	B	B	A	B	B	B	A	B	B	B	A	A	B	A	A	B	B	B	B	B	A	A	A	B	A	A	B	B	A	A	B	A	B	A	A	A	A	B	B	B
IWB62692	RAC875_rep_c70449_63	6B	14.2096	B	A	B	B	B	B	B	B	A	-	B	B	A	B	B	B	A	A	B	A	A	B	-	B	B	B	A	A	A	B	A	A	B	B	A	A	B	A	B	A	A	A	A	B	B	B
IWB7778	BS00030457_51	6B	14.2096	B	A	B	B	B	B	B	B	A	B	B	B	A	B	B	B	A	A	B	A	A	B	B	B	B	B	A	A	A	B	A	A	B	B	A	A	B	A	B	A	A	A	A	B	B	B
IWB7937	BS00033642_51	6B	21.5791	B	A	B	B	B	B	B	B	A	B	B	B	A	B	B	A	B	A	B	A	A	B	A	A	B	B	A	B	A	A	A	A	B	B	A	A	B	A	B	A	A	A	A	B	B	B
IWB7935	BS00033629_51	6B	21.9288	B	A	B	B	B	B	B	B	A	B	B	B	A	B	B	A	B	A	B	A	A	B	A	A	B	B	A	B	A	-	A	A	B	A	A	A	B	A	B	A	A	A	A	B	B	B
IWB73576	Tdurum_contig82504_154	6B	21.9288	B	A	B	B	B	B	B	B	A	-	B	B	A	B	-	A	B	A	B	A	A	B	A	A	B	B	A	B	A	-	A	A	B	A	A	A	B	A	B	A	A	A	A	B	B	B
IWA1850	wsnp_Ex_c14031_21934322	6B	24.5044	B	A	B	B	B	B	B	B	B	B	B	B	A	A	-	A	B	A	B	A	A	B	A	A	B	B	A	B	A	A	B	A	B	A	A	A	B	A	B	A	A	A	A	B	B	B
IWA1851	wsnp_Ex_c14031_21934513	6B	24.5044	B	A	B	B	B	B	B	B	B	B	B	B	A	A	-	A	B	A	B	A	A	B	A	A	B	B	A	B	A	A	B	A	B	A	A	A	B	A	B	A	A	A	A	B	B	B
IWB28072	Excalibur_c61792_51	6B	25.9132	B	A	A	B	B	B	B	B	B	B	B	B	A	A	-	A	B	A	B	A	A	B	A	A	B	B	A	B	A	A	B	A	B	A	A	A	B	A	B	A	A	A	A	B	B	B
IWB72920	Tdurum_contig62941_335	6B	25.9132	B	A	A	B	B	B	B	B	B	B	B	B	A	A	-	A	B	A	B	A	A	B	A	A	B	B	A	B	A	A	B	A	B	A	A	A	B	A	B	A	A	A	A	B	B	B
IWB51651	Ra_c27159_181	6B	26.9478	B	A	A	B	B	B	B	B	B	B	B	A	A	A	-	A	B	A	B	A	A	B	A	A	B	B	A	B	A	A	B	A	B	A	A	A	B	A	B	A	A	A	A	B	B	B
IWB12424	BS00109708_51	6B	26.9478	B	A	A	B	B	B	B	B	B	B	B	A	A	A	-	A	B	A	B	A	A	B	A	A	B	B	A	B	A	A	B	A	B	A	A	A	B	A	B	A	A	A	A	B	B	B
IWB74197	tplb0024k14_744	6B	28.0042	B	A	A	B	B	B	B	B	B	B	B	A	A	A	-	A	B	A	A	A	A	B	A	A	B	B	A	B	A	A	B	A	B	A	A	A	B	A	B	A	A	A	A	B	B	B
IWB12108	BS00099998_51	6B	31.2934	B	A	A	B	B	B	B	B	B	B	B	A	A	A	B	B	B	A	A	A	A	B	A	A	B	B	A	B	A	A	B	A	B	A	B	B	B	A	A	A	A	A	A	B	B	B
IWB72766	Tdurum_contig61150_752	6B	33.0546	B	A	A	B	B	B	B	B	B	B	B	A	A	B	B	B	B	A	A	B	A	B	A	A	B	B	A	B	B	A	B	A	B	A	B	B	B	A	A	A	A	A	A	B	B	B
IWB53136	RAC875_c10650_90	6B	35.5566	-	A	A	B	B	B	B	B	B	-	B	A	A	B	B	B	B	A	A	B	A	B	A	A	B	B	A	B	B	A	B	A	B	A	B	B	B	A	A	A	A	A	A	B	B	B
IWB63808	RFL_Contig2024_600	6B	35.9038	-	A	A	B	B	B	B	B	B	B	B	A	A	B	B	B	B	A	A	B	A	B	A	A	B	B	A	B	B	A	B	A	B	A	B	B	B	A	A	A	A	A	A	B	B	B
IWB74047	Tdurum_contig9860_281	6B	39.193	-	A	A	B	B	B	B	B	B	B	B	A	A	B	B	B	B	A	A	B	A	B	A	A	B	B	A	B	B	A	B	A	B	A	B	B	B	A	A	A	A	A	A	B	B	B
IWB72482	Tdurum_contig56007_439	6B	39.193	-	A	A	B	B	B	B	B	B	B	B	A	A	B	B	B	B	A	A	B	A	B	A	A	B	B	A	B	B	A	B	A	B	A	B	B	B	A	A	A	A	A	A	B	B	B
IWB72400	Tdurum_contig5486_1406	6B	39.5332	-	A	A	B	B	B	B	B	B	B	B	A	A	B	B	B	B	A	A	B	A	B	A	A	B	B	A	B	B	A	B	A	B	A	B	B	B	A	A	A	A	A	A	B	B	B
IWB90	BobWhite_c10614_157	6B	45.3278	-	A	-	B	B	B	B	B	B	B	B	A	A	B	B	B	B	A	A	B	A	A	B	B	B	B	A	B	B	A	B	B	B	A	B	B	B	A	A	A	A	A	A	A	B	B
IWA5888	wsnp_JD_c18284_16822042	6B	45.3278	-	A	-	B	B	B	B	B	B	B	B	A	A	B	B	B	B	A	A	B	A	A	B	B	B	B	A	B	B	A	B	B	B	A	B	B	B	A	A	A	A	A	A	A	B	B
IWB28975	Excalibur_c80941_665	6B	53.9483	A	A	A	B	B	A	B	B	B	B	B	A	B	A	B	B	B	A	B	B	A	B	B	B	B	B	A	B	A	A	B	B	B	A	B	B	A	A	A	A	A	B	A	B	B	B
IWB70709	Tdurum_contig41980_2722	6B	53.9483	A	A	A	B	B	A	B	B	B	B	B	A	B	A	B	B	B	A	B	B	A	B	B	B	B	B	A	B	A	A	B	B	B	A	B	B	A	A	A	A	A	B	A	B	B	B
IWB70708	Tdurum_contig41980_2293	6B	53.9483	A	A	A	B	B	A	B	B	B	B	B	A	B	A	B	B	B	A	B	B	A	B	B	B	B	B	A	B	A	A	B	B	B	A	B	B	A	A	A	A	A	B	A	B	B	B
IWB70707	Tdurum_contig41980_1727	6B	53.9483	A	A	A	B	B	A	B	B	B	B	B	A	B	A	B	B	B	A	B	B	A	B	B	B	B	B	A	B	A	A	B	B	B	A	B	B	A	A	A	A	A	B	A	B	B	B
IWB70710	Tdurum_contig41980_619	6B	53.9483	A	A	A	B	B	A	B	B	B	B	B	A	B	A	B	B	B	A	B	B	A	B	B	B	B	B	A	B	A	A	B	B	B	A	B	B	A	A	A	A	A	B	A	B	B	B
IWB33829	GENE-4197_99	6B	53.9483	A	A	A	B	B	A	B	B	B	B	B	A	B	A	B	B	B	A	B	B	A	B	B	B	B	B	A	B	A	A	B	B	B	A	B	B	A	A	A	A	A	B	A	B	B	B
IWA3501	wsnp_Ex_c34962_43193869	6B	53.9483	A	A	A	B	B	A	B	B	B	B	B	A	B	A	B	B	B	A	B	B	A	B	B	B	B	B	A	B	A	A	B	B	B	A	B	B	A	A	A	A	A	B	A	B	B	B
IWA7937	wsnp_Ra_c4330_7871129	6B	54.6379	A	A	A	B	B	A	B	B	B	B	B	A	B	A	B	B	B	A	B	B	A	B	B	B	B	B	A	B	A	A	B	B	B	A	B	B	A	A	A	A	A	B	B	B	B	B
IWB69644	Tdurum_contig28832_337	6B	56.4243	A	A	A	B	B	A	B	B	B	B	B	A	-	A	B	B	B	A	B	B	A	B	B	B	B	B	B	B	A	A	B	B	B	A	B	B	A	B	A	A	A	B	B	A	B	B
IWB72202	Tdurum_contig51676_120	6B	56.4243	A	A	A	B	B	A	B	B	B	B	B	A	-	A	B	B	B	A	B	B	A	B	B	B	B	B	B	B	A	A	B	B	B	A	B	B	A	B	A	A	A	B	B	A	B	B
IWB2007	BobWhite_c26504_163	6B	57.5036	A	A	A	B	B	A	B	B	B	B	B	A	-	A	B	B	B	A	B	B	A	B	B	A	B	B	B	B	A	A	B	B	B	A	B	B	-	B	A	B	A	B	B	A	B	B
IWB5586	BobWhite_rep_c65994_267	6B	57.5036	A	A	A	B	B	A	B	B	B	B	B	A	-	A	B	B	B	A	B	B	A	B	B	A	B	B	B	B	A	A	B	B	B	A	B	B	-	B	A	B	A	B	B	A	B	B
IWB18	BobWhite_c10140_297	6B	60.6324	A	-	A	B	B	A	B	B	B	B	A	A	-	A	B	B	B	A	B	B	-	B	-	A	B	B	B	B	B	B	B	B	B	A	B	B	B	B	A	B	A	B	B	A	B	B
IWB10656	BS00073259_51	6B	60.9948	A	-	A	B	B	A	B	B	B	B	A	A	-	A	B	B	B	A	B	B	-	B	-	A	B	B	B	B	B	B	B	B	B	A	B	B	-	B	A	B	A	B	B	A	B	B
IWA2342	wsnp_Ex_c18669_27544717	6B	60.9948	A	-	A	B	B	A	B	B	B	-	A	A	-	A	B	B	B	A	B	B	-	B	-	A	B	B	B	B	B	B	B	B	B	A	-	B	-	B	A	B	A	B	B	A	B	B
IWB1636	BobWhite_c22767_189	6B	60.9948	A	-	A	B	B	A	B	B	B	B	A	-	-	A	B	B	B	A	B	B	-	B	-	A	B	B	B	B	B	B	B	B	B	A	B	B	B	B	A	B	A	B	B	A	B	B
IWB73427	Tdurum_contig77621_396	6B	62.4877	A	-	A	B	B	A	B	B	B	B	A	A	-	B	B	B	B	A	B	B	-	B	-	A	B	B	B	B	B	B	B	B	B	A	B	B	B	B	A	B	A	B	B	A	B	B
IWB36646	Jagger_c555_287	6B	62.8526	A	-	A	B	B	A	B	B	B	-	A	A	-	B	B	B	B	A	B	B	-	B	-	A	B	B	B	B	B	B	B	B	B	A	B	B	B	B	A	B	A	B	B	A	B	B
IWA2244	wsnp_Ex_c17667_26408733	6B	62.8526	A	-	A	B	B	A	B	B	B	B	A	A	-	B	B	B	B	A	B	B	-	B	-	A	B	B	B	B	B	B	B	B	B	A	B	B	B	B	A	B	A	B	B	A	B	B
IWB36647	Jagger_c555_818	6B	62.8526	A	-	A	B	B	A	B	B	B	B	A	A	-	B	B	B	B	A	B	B	-	B	-	A	B	B	B	B	B	B	B	B	B	A	B	B	B	B	A	B	A	B	B	A	B	B
IWB7574	BS00025302_51	6B	62.8526	A	-	A	B	B	A	B	B	B	B	A	A	-	B	B	B	B	A	B	B	-	B	-	A	B	B	B	B	B	B	B	B	B	A	B	B	B	B	A	B	A	B	B	A	B	B
IWB1088	BobWhite_c17750_568	6B	62.8526	A	-	A	B	B	A	B	B	B	B	A	A	-	B	B	B	B	A	B	B	-	B	-	A	B	B	B	B	B	B	B	B	B	A	B	B	B	B	A	B	A	B	B	A	B	B
IWB9014	BS00063174_51	6B	62.8526	A	-	A	B	B	A	B	B	B	B	A	A	-	B	B	B	B	A	B	B	-	B	-	A	B	B	B	B	B	B	B	B	B	A	B	B	B	B	A	B	A	B	B	A	B	B
IWB14722	CAP8_c4223_13	6B	62.8526	A	-	A	B	B	A	B	B	B	B	A	A	-	B	B	B	B	A	B	B	-	B	-	A	B	B	B	B	B	B	B	B	B	A	B	B	B	B	A	B	A	B	B	A	B	B
IWB25741	Excalibur_c36650_1557	6B	62.8526	A	-	A	B	B	A	B	B	B	B	A	A	-	B	B	B	B	A	B	B	-	B	-	A	B	B	B	B	B	B	B	B	B	A	B	B	B	B	A	B	A	B	B	A	B	B
IWA4515	wsnp_Ex_c6466_11234080	6B	62.8526	A	-	A	B	B	A	B	B	B	B	A	A	-	B	B	B	B	A	B	B	-	B	-	A	B	B	B	B	B	B	B	B	B	A	B	B	B	B	A	B	A	B	B	A	B	B
IWB8461	BS00047254_51	6B	62.8526	A	-	A	B	B	A	B	B	B	B	A	A	-	B	B	B	B	A	B	B	-	B	-	A	B	B	B	B	B	B	B	B	B	A	B	B	B	B	A	B	A	B	B	A	B	B
IWA2451	wsnp_Ex_c19707_28702378	6B	62.8526	A	-	A	B	B	A	B	B	B	B	A	A	-	B	B	B	B	A	B	B	-	B	-	A	B	B	B	B	B	B	B	B	B	A	B	B	B	B	A	B	A	B	B	A	B	B
IWB45168	Kukri_c41694_285	6B	63.2022	A	-	A	B	B	A	B	B	B	-	A	A	B	B	B	B	B	A	B	B	-	B	-	A	B	B	B	B	B	B	B	B	B	A	B	B	B	B	A	B	A	B	B	A	B	B
IWB32983	GENE-2606_197	6B	63.2022	A	-	A	B	B	A	B	B	B	B	A	A	B	B	B	B	B	A	B	B	-	B	-	A	B	B	B	B	B	B	B	B	B	A	B	B	B	B	A	B	A	B	B	A	B	B
IWA8192	wsnp_Ra_rep_c73731_71807419	6B	63.2022	A	-	A	B	B	A	B	B	B	B	A	A	B	B	B	B	B	A	B	B	-	B	-	A	B	B	B	B	B	B	B	B	B	A	B	B	B	B	A	B	A	B	B	A	B	B
IWA5531	wsnp_Ex_rep_c68480_67305954	6B	63.2022	A	-	A	B	B	A	B	B	B	B	A	A	B	B	B	B	B	A	B	B	-	B	-	A	B	B	B	B	B	B	B	B	B	A	B	B	B	B	A	B	A	B	B	A	B	B
IWB10171	BS00067873_51	6B	63.2022	A	-	A	B	B	A	B	B	B	B	A	A	B	B	B	B	B	A	B	B	-	B	-	A	B	B	B	B	B	B	B	B	B	A	B	B	B	B	A	B	A	B	B	A	B	B
IWA8189	wsnp_Ra_rep_c73725_71801046	6B	63.2022	A	-	A	B	B	A	B	B	B	B	A	A	B	B	B	B	B	A	B	B	-	B	-	A	B	B	B	B	B	B	B	B	B	A	B	B	B	B	A	B	A	B	B	A	B	B
IWA7995	wsnp_Ra_c54050_57499377	6B	63.2022	A	-	A	B	B	A	B	B	B	B	A	A	B	B	B	B	B	A	B	B	-	B	-	A	B	B	B	B	B	B	B	B	B	A	B	B	B	B	A	B	A	B	B	A	B	B
IWB51631	Ra_c26497_381	6B	63.5471	A	-	A	B	B	A	B	B	B	B	A	A	B	B	B	B	B	A	B	B	-	B	-	A	B	B	B	B	B	B	B	B	B	A	B	B	B	B	A	B	A	B	B	A	B	B
IWA3917	wsnp_Ex_c44857_50804565	6B	63.5471	A	-	A	B	B	A	B	B	B	B	A	A	B	B	B	B	B	A	B	B	-	B	-	A	B	B	B	B	B	B	B	B	B	A	B	B	B	B	A	B	A	B	B	A	B	B
IWB18183	D_GBB4FNX01BO9N8_336	6B	63.5471	A	-	A	B	B	A	B	B	B	B	A	A	B	B	B	B	B	A	B	B	-	B	-	A	B	B	B	B	B	B	B	B	B	A	B	B	B	B	A	B	A	B	B	A	B	B
IWB7615	BS00026203_51	6B	63.5471	A	-	A	B	B	A	B	B	B	B	A	A	B	B	B	B	B	A	B	B	-	B	-	A	B	B	B	B	B	B	B	B	B	A	B	B	B	B	A	B	A	B	B	A	B	B
IWB57747	RAC875_c41604_1001	6B	63.5471	A	-	A	B	B	A	B	B	B	B	A	A	B	B	B	B	B	A	B	B	-	B	-	A	B	B	B	B	B	B	B	B	B	A	B	B	B	B	A	B	A	B	B	A	B	B
IWA4783	wsnp_Ex_c8267_13954978	6B	63.5471	A	-	A	B	B	A	B	B	B	B	A	A	B	B	B	B	B	A	B	B	-	B	-	A	B	B	B	B	B	B	B	B	B	A	B	B	B	B	A	B	A	B	B	A	B	B
IWB36648	Jagger_c556_473	6B	63.5471	A	-	A	B	B	A	B	B	B	B	A	A	B	B	B	B	B	A	B	B	-	B	-	A	B	B	B	B	B	B	B	B	B	A	B	B	B	B	A	B	A	B	B	A	B	B
IWB28873	Excalibur_c7823_397	6B	63.5471	A	-	A	B	B	A	B	B	B	B	A	A	B	B	B	B	B	A	B	B	-	B	-	A	B	B	B	B	B	B	B	B	B	A	B	B	B	B	A	B	A	B	B	A	B	B
IWB38105	Ku_c1044_1007	6B	63.5471	A	-	A	B	B	A	B	B	B	B	A	A	B	B	B	B	B	A	B	B	-	B	-	A	B	B	B	B	B	B	B	B	B	A	B	B	B	B	A	B	A	B	B	A	B	B
IWA7571	wsnp_Ra_c11600_18784716	6B	63.5471	A	-	A	B	B	A	B	B	B	B	A	A	B	B	B	B	B	A	B	B	-	B	-	A	B	B	B	B	B	B	B	B	B	A	B	B	B	B	A	B	A	B	B	A	B	B
IWB56968	RAC875_c34604_142	6B	63.5471	A	-	A	B	B	A	B	B	B	B	A	A	B	B	B	B	B	A	B	B	-	B	-	A	B	B	B	B	B	B	B	B	B	A	B	B	B	B	A	B	A	B	B	A	B	B
IWA5242	wsnp_Ex_rep_c66458_64698299	6B	63.5471	A	-	A	B	B	A	B	B	B	B	A	A	B	B	B	B	B	A	B	B	-	B	-	A	B	B	B	B	B	B	B	B	B	A	B	B	B	B	A	B	A	B	B	A	B	B
IWA1839	wsnp_Ex_c1398_2677127	6B	63.8919	A	-	A	B	B	A	B	B	B	B	A	A	B	B	B	B	B	A	B	B	-	B	-	A	B	B	B	B	B	B	B	B	B	B	B	B	B	B	A	B	A	B	B	A	B	B
IWB10584	BS00071912_51	6B	63.8919	A	-	A	B	B	A	B	B	B	B	A	A	B	B	B	B	B	A	B	B	-	B	-	A	B	B	B	B	B	B	B	B	B	B	B	B	B	B	A	B	A	B	B	A	B	B
IWB60984	RAC875_c90029_92	6B	63.8919	A	-	A	B	B	A	B	B	B	B	A	A	B	B	B	B	B	A	B	B	-	B	-	A	B	B	B	B	B	B	B	B	B	B	B	B	B	B	A	B	A	B	B	A	B	B
IWB46486	Kukri_c55096_140	6B	63.8919	A	-	A	B	B	A	B	B	B	B	A	A	B	B	B	B	B	A	B	B	-	B	-	A	B	B	B	B	B	B	B	B	B	B	B	B	B	B	A	B	A	B	B	A	B	B
IWA3652	wsnp_Ex_c3858_7011837	6B	63.8919	A	-	A	B	B	A	B	B	B	B	A	A	B	B	B	B	B	A	B	B	-	B	-	A	B	B	B	B	B	B	B	B	B	B	B	B	B	B	A	B	A	B	B	A	B	B
IWA941	wsnp_CAP12_c242_135767	6B	63.8919	A	-	A	B	B	A	B	B	B	B	A	A	B	B	B	B	B	A	B	B	-	B	-	A	B	B	B	B	B	B	B	B	B	B	B	B	B	B	A	B	A	B	B	A	B	B
IWB13931	CAP7_c2536_65	6B	63.8919	A	-	A	B	B	A	B	B	B	B	A	A	B	B	B	B	B	A	B	B	-	B	-	A	B	B	B	B	B	B	B	B	B	B	B	B	B	B	A	B	A	B	B	A	B	B
IWB11122	BS00080317_51	6B	63.8919	A	-	A	B	B	A	B	B	B	B	A	A	B	B	B	B	B	A	B	B	-	B	-	A	B	B	B	B	B	B	B	B	B	B	B	B	B	B	A	B	A	B	B	A	B	B
IWB71603	Tdurum_contig45370_704	6B	63.8919	A	-	A	B	B	A	B	B	B	B	A	A	B	B	B	B	B	A	B	B	-	B	-	A	B	B	B	B	B	B	B	B	B	B	B	B	B	B	A	B	A	B	B	A	B	B
IWB5404	BobWhite_rep_c63804_353	6B	63.8919	A	-	A	B	B	A	B	B	B	B	A	A	B	B	B	B	B	A	B	B	-	B	-	A	B	B	B	B	B	B	B	B	B	B	B	B	B	B	A	B	A	B	B	A	B	B
IWB46081	Kukri_c50603_164	6B	63.8919	A	-	A	B	B	A	B	B	B	B	A	A	B	B	B	B	B	A	B	B	-	B	-	A	B	B	B	B	B	B	B	B	B	B	B	B	B	B	A	B	A	B	B	A	B	B
IWB65914	TA005016-0827	6B	63.8919	A	-	A	B	B	A	B	B	B	B	A	A	B	B	B	B	B	A	B	B	-	B	-	A	B	B	B	B	B	B	B	B	B	B	B	B	B	B	A	B	A	B	B	A	B	B
IWB33826	GENE-4195_165	6B	63.8919	A	-	A	B	B	A	B	B	B	B	A	A	B	B	B	B	B	A	B	B	-	B	-	A	B	B	B	B	B	B	B	B	B	B	B	B	B	B	A	B	A	B	B	A	B	B
IWB197	BobWhite_c11301_226	6B	63.8919	A	-	A	B	B	A	B	B	B	B	A	A	B	B	B	B	B	A	B	B	-	B	-	A	B	B	B	B	B	B	B	B	B	B	B	B	B	B	A	B	A	B	B	A	B	B
IWB71651	Tdurum_contig4592_327	6B	63.8919	A	-	A	B	B	A	B	B	B	B	A	A	B	B	B	B	B	A	B	B	-	B	-	A	B	B	B	B	B	B	B	B	B	B	B	B	B	B	A	B	A	B	B	A	B	B
IWB46391	Kukri_c54_306	6B	63.8919	A	-	A	B	B	A	B	B	B	B	A	A	B	B	B	B	B	A	B	B	-	B	-	A	B	B	B	B	B	B	B	B	B	B	B	B	B	B	A	B	A	B	B	A	B	B
IWB34383	IAAV1460	6B	63.8919	A	-	A	B	B	A	B	B	B	B	A	A	B	B	B	B	B	A	B	B	-	B	-	A	B	B	B	B	B	B	B	B	B	B	B	B	B	B	A	B	A	B	B	A	B	B
IWB73415	Tdurum_contig77234_467	6B	63.8919	A	-	A	B	B	A	B	-	B	B	A	A	B	B	B	B	B	A	B	B	-	B	-	A	B	B	B	B	B	B	B	B	B	B	B	B	B	B	A	B	A	B	B	A	B	B
IWA5345	wsnp_Ex_rep_c67012_65465341	6B	63.8919	A	-	A	B	B	A	B	-	B	B	A	A	B	B	B	B	B	A	B	B	-	B	-	A	B	B	B	B	B	B	B	B	B	B	B	B	B	B	A	B	A	B	B	A	B	B
IWB73148	Tdurum_contig69600_415	6B	66.4866	A	-	A	B	B	A	B	-	B	B	A	A	-	B	B	B	B	A	B	B	-	B	-	A	B	B	B	B	B	B	B	B	B	B	B	B	B	B	A	B	A	B	B	A	B	B
IWB10698	BS00073906_51	6B	68.3392	A	A	A	B	B	B	B	B	B	B	A	B	A	B	B	B	B	A	B	B	-	B	-	A	B	B	B	B	B	B	B	B	B	B	B	B	-	B	-	B	A	B	B	A	B	B
IWB11475	BS00086964_51	6B	69.4032	A	A	A	B	B	B	B	B	B	B	A	B	A	B	B	B	B	A	B	B	-	B	-	A	B	B	B	B	B	B	B	B	B	B	B	B	-	B	-	B	A	B	B	A	B	B
IWB73934	Tdurum_contig9531_176	6B	69.4032	A	A	A	B	B	B	B	B	B	B	A	B	A	B	B	B	B	A	B	B	-	B	-	A	B	B	B	B	B	B	B	B	B	B	B	B	-	B	-	B	A	B	B	A	B	B
IWA4485	wsnp_Ex_c6356_11056222	6B	70.8634	A	A	A	B	B	B	B	B	B	B	A	B	A	B	B	B	B	A	B	B	-	B	-	A	B	B	B	B	B	B	B	A	B	B	B	B	B	B	-	B	A	B	B	A	B	B
IWB58026	RAC875_c4420_371	6B	70.8634	A	A	A	B	B	B	B	B	B	B	A	B	A	B	B	B	B	A	B	B	-	B	-	A	B	B	B	B	B	B	B	A	B	B	B	B	B	B	-	B	A	B	B	A	B	B
IWB72359	Tdurum_contig54525_2045	6B	74.6874	A	A	-	B	B	B	B	B	B	B	A	B	A	B	A	B	B	B	B	B	A	B	A	A	B	B	B	B	B	B	B	A	B	B	B	B	B	B	B	B	B	B	B	A	B	B
IWB68462	Tdurum_contig15762_139	6B	74.6874	A	A	-	B	B	B	B	B	B	B	A	B	A	B	A	B	B	B	B	B	A	B	A	A	B	B	B	B	B	B	B	A	B	B	B	B	B	B	B	B	B	B	B	A	B	B
IWB73369	Tdurum_contig76473_357	6B	74.6874	A	A	-	B	B	B	B	B	B	B	A	B	A	B	A	B	B	B	B	B	A	B	A	A	B	B	B	B	B	B	B	A	B	B	B	B	B	B	B	B	B	B	B	A	B	B
IWA6660	wsnp_Ku_c1876_3666308	6B	75.3677	A	A	-	B	B	B	B	B	B	B	A	B	A	B	A	B	B	B	B	B	A	B	A	A	B	B	A	B	B	B	B	A	B	B	B	B	B	B	B	B	B	B	B	A	B	B
IWB72870	Tdurum_contig62155_325	6B	76.0526	A	A	-	B	B	B	B	B	B	B	A	B	A	B	A	B	B	B	B	B	A	B	A	A	B	B	A	B	B	B	B	A	B	B	B	B	B	B	B	B	B	B	B	A	B	B
IWB44917	Kukri_c39369_307	6B	76.0526	A	A	-	B	B	B	B	B	B	B	A	B	A	B	A	B	B	B	B	B	A	B	A	A	B	B	A	B	B	B	B	A	B	B	B	B	B	B	B	B	B	B	B	A	B	B
IWB2838	BobWhite_c36416_56	6B	77.4515	A	A	-	A	B	B	B	B	B	B	A	B	A	B	A	B	B	B	B	B	B	B	A	A	B	B	A	B	B	B	B	A	B	B	B	B	B	B	B	B	B	B	B	A	B	B
IWA6904	wsnp_Ku_c3185_5949143	6B	77.4515	A	A	-	A	B	B	B	B	B	B	A	B	A	B	A	B	B	B	B	B	B	B	A	A	B	B	A	B	B	B	B	A	B	B	B	B	B	B	B	B	B	B	B	A	B	B
IWB43816	Kukri_c3014_818	6B	79.9535	A	A	-	A	B	B	B	B	B	B	A	B	A	B	A	B	B	B	B	B	A	B	A	A	B	B	A	B	B	B	B	A	B	A	B	B	B	B	B	B	B	B	A	A	B	B
IWA3768	wsnp_Ex_c4124_7455032	6B	79.9535	A	A	-	A	B	B	B	B	B	B	A	B	A	B	A	B	B	B	B	B	A	B	A	A	B	B	A	B	B	B	B	A	B	A	B	B	B	B	B	B	B	B	A	A	B	B
IWB74068	Tdurum_contig9936_384	6B	79.9535	A	A	-	A	B	B	B	B	B	B	A	B	A	B	A	B	B	B	B	B	A	B	A	A	B	B	A	B	B	B	B	A	B	A	B	B	B	B	B	B	B	B	A	A	B	B
IWB72572	Tdurum_contig57255_86	6B	82.4734	A	A	-	A	B	B	B	B	B	B	A	A	A	B	A	B	B	B	B	B	A	B	A	A	B	B	A	B	B	B	B	A	B	B	A	A	B	B	B	B	B	B	A	A	B	B
IWB73224	Tdurum_contig74717_297	6B	82.4734	A	A	-	A	B	B	B	B	B	B	A	A	A	B	A	B	B	B	B	B	A	B	A	A	B	B	A	B	B	B	B	A	B	B	A	A	B	B	B	B	B	B	A	A	B	B
IWB32217	GENE-1074_108	6B	84.2471	A	A	-	A	B	B	B	B	B	B	A	A	A	B	A	B	B	B	B	A	A	B	A	A	B	B	A	B	B	A	B	A	B	B	A	A	B	B	B	B	B	B	A	A	B	B
IWB7702	BS00028997_51	6B	89.1871	A	A	B	A	A	B	B	B	B	B	A	A	A	B	A	B	B	A	B	B	B	B	A	A	B	B	A	B	B	A	B	A	B	A	A	A	B	B	A	B	B	B	A	A	B	B
IWB70643	Tdurum_contig41142_267	6B	105.98	A	A	B	A	A	B	B	B	B	B	A	-	A	B	A	B	B	A	B	B	B	B	B	B	B	B	A	B	B	A	B	A	B	A	A	A	A	B	A	A	A	A	A	A	B	B
IWB71618	Tdurum_contig45559_403	6B	105.98	A	A	B	A	A	B	B	B	B	B	A	-	A	B	A	B	B	A	B	B	B	B	B	B	B	B	A	B	B	A	B	A	B	A	A	A	A	B	A	A	A	A	A	A	B	B
IWB69684	Tdurum_contig29013_239	6B	113.172	A	A	B	A	A	B	B	B	B	B	A	A	A	B	B	B	B	A	B	B	B	B	B	B	A	B	A	B	B	A	B	A	B	A	A	A	A	B	A	B	A	-	A	A	A	B
IWB60708	RAC875_c82640_416	6B	122.244	A	A	B	A	A	A	A	A	B	B	A	A	A	B	B	B	B	A	B	B	B	B	B	B	A	B	A	B	A	A	B	A	B	A	A	A	A	B	B	B	A	-	A	A	A	B
IWA7116	wsnp_Ku_c4910_8793327	6B	136.506	A	B	A	B	A	A	A	A	B	B	A	A	A	B	A	B	B	B	B	A	A	B	A	A	A	B	A	B	A	-	B	A	B	A	B	B	A	B	B	B	A	A	A	B	A	B
IWB27199	Excalibur_c51068_220	6B	136.506	A	B	A	B	A	A	A	A	B	B	A	A	A	B	A	B	B	B	B	A	A	B	A	A	A	B	A	B	A	-	B	A	B	A	B	B	A	B	B	B	A	A	A	B	A	B
IWB10041	BS00067417_51	6B	142.222	A	B	A	B	A	A	A	A	A	B	A	A	A	A	A	B	A	B	B	A	A	B	A	A	A	B	A	B	A	-	B	A	B	A	B	-	A	B	B	B	A	A	A	B	A	A
IWB49568	Kukri_rep_c112678_555	6B	142.222	A	B	A	B	A	A	A	A	A	B	A	A	A	A	A	B	A	B	B	A	A	B	A	A	A	B	A	B	A	-	B	A	B	A	B	-	A	B	B	B	A	A	A	B	A	A
IWB10245	BS00068166_51	6B	143.671	A	B	A	B	A	A	A	A	A	B	A	B	A	A	A	B	A	B	B	A	A	B	A	A	A	B	A	B	A	-	B	A	B	A	B	-	A	B	B	B	A	B	A	A	A	A
IWB2117	BobWhite_c27559_270	6B	146.728	A	B	A	B	A	A	A	A	A	B	A	B	A	A	A	B	A	B	B	-	A	B	A	-	B	B	A	B	A	-	B	A	B	A	B	-	A	B	B	B	A	B	A	A	A	A
IWB59972	RAC875_c65710_156	6B	146.728	A	B	A	B	A	A	A	A	A	B	A	B	A	A	A	B	A	B	B	-	A	B	A	-	B	B	A	B	A	-	B	A	B	A	B	-	A	B	B	B	A	B	A	A	A	A
IWB73308	Tdurum_contig75763_741	6B	146.728	A	B	A	B	A	A	A	A	A	B	A	B	A	A	A	B	A	B	B	-	A	B	A	-	B	B	A	B	A	-	B	A	B	A	B	-	A	B	B	B	A	B	A	A	A	A
IWB73307	Tdurum_contig75763_629	6B	146.728	A	B	A	B	A	A	A	A	A	B	A	B	A	A	A	B	A	B	B	-	A	B	A	-	B	B	A	B	A	-	B	A	B	A	B	-	A	B	B	B	A	B	A	A	A	A
IWB43577	Kukri_c28517_372	6B	146.728	A	B	A	B	A	A	A	A	A	B	A	B	A	A	A	B	A	B	B	-	A	B	A	-	B	B	A	B	A	-	B	A	B	A	B	-	A	B	B	B	A	B	A	A	A	A
IWB73109	Tdurum_contig68452_377	6B	147.09	A	B	A	A	A	A	A	A	A	B	A	B	A	A	A	B	A	B	B	-	A	B	A	-	B	B	A	B	A	B	B	A	B	A	B	A	A	B	B	B	A	B	A	A	A	A
IWB36649	Jagger_c5597_332	6B	148.194	A	B	A	A	A	A	A	A	A	B	A	B	A	A	A	B	A	B	B	-	A	B	A	-	A	B	A	B	A	-	B	A	B	A	B	A	A	B	B	B	A	B	A	A	A	A
IWA5606	wsnp_Ex_rep_c69373_68312188	6B	148.194	A	B	A	A	A	A	A	A	A	B	A	B	A	A	A	B	A	B	B	-	A	B	A	-	A	B	A	B	A	-	B	A	B	A	B	A	A	B	B	B	A	B	A	A	A	A
IWB13085	CAP11_c949_196	6B	150.06	A	B	A	A	A	-	A	A	A	B	A	B	A	A	A	B	A	B	B	A	A	B	A	-	A	B	A	B	A	-	B	A	B	A	A	A	A	B	B	B	A	B	A	A	A	A
IWB73603	Tdurum_contig83023_225	6B	151.179	A	B	A	A	A	A	A	A	A	B	A	B	A	A	A	B	A	B	B	A	A	B	A	-	A	B	A	B	A	-	B	A	B	A	A	B	A	B	B	B	A	B	A	A	A	A
IWB72122	Tdurum_contig50822_456	6B	152.283	A	B	A	A	A	A	A	A	A	B	A	B	A	A	A	B	A	B	B	A	A	B	A	-	B	B	A	B	A	-	B	A	B	A	A	B	A	B	B	B	A	B	A	A	A	A
IWB65437	TA001682-1583	6B	153.018	A	B	A	A	A	A	A	A	A	B	A	B	A	A	A	B	A	B	B	A	B	B	A	A	B	B	A	B	A	A	B	A	B	A	A	B	A	B	B	B	A	B	A	A	A	-
IWB73036	Tdurum_contig65998_182	6B	168.14	A	A	A	A	A	B	B	B	A	A	A	A	B	A	A	B	B	B	B	B	B	B	B	B	B	B	A	A	A	B	B	A	B	A	A	B	A	B	B	B	A	B	B	A	A	B
IWB10420	BS00069822_51	6B	168.14	A	A	A	A	A	B	B	B	A	A	A	A	B	A	A	B	B	B	B	B	B	B	B	B	B	B	A	A	A	B	B	A	B	A	A	B	A	B	B	B	A	B	B	A	A	B
IWB73072	Tdurum_contig67619_532	6B	168.14	A	A	A	A	A	B	B	B	A	A	A	A	B	A	A	B	B	B	B	B	B	B	B	B	B	B	A	A	A	B	B	A	B	A	A	B	A	B	B	B	A	B	B	A	A	B
IWB7277	BS00022828_51	6B	168.14	A	A	A	A	A	B	B	B	A	A	A	A	B	A	A	B	B	B	B	B	B	B	B	B	B	B	A	A	A	B	B	A	B	A	A	B	A	B	B	B	A	B	B	A	A	B
IWB11889	BS00094584_51	6B	168.14	A	A	A	A	A	B	B	B	A	A	A	A	B	A	A	B	B	B	B	B	B	B	B	B	B	B	A	A	A	B	B	A	B	A	A	B	A	B	B	B	A	B	B	A	A	B
IWB72512	Tdurum_contig5646_154	7A	0	A	B	A	B	B	B	B	B	B	B	B	A	B	A	A	A	A	A	A	A	B	A	A	-	A	A	A	B	A	B	B	A	B	A	B	B	A	A	A	A	A	B	A	A	B	-
IWB73316	Tdurum_contig75811_1629	7A	0	A	B	A	B	B	B	B	B	B	B	B	-	B	A	A	A	A	A	A	A	B	A	A	-	A	A	A	B	A	B	B	A	B	A	B	B	-	-	-	A	A	B	A	A	B	-
IWB72233	Tdurum_contig52015_1695	7A	0	A	B	A	B	B	B	B	B	B	B	B	A	B	A	A	A	A	A	A	A	B	A	A	-	A	A	A	B	A	B	B	A	B	A	B	B	A	A	A	A	A	B	A	A	B	-
IWB11073	BS00079237_51	7A	0	A	B	A	B	B	-	B	B	B	B	B	A	B	A	A	A	A	A	A	A	B	A	A	-	A	A	A	B	A	B	B	A	B	A	B	B	A	A	A	A	A	B	A	A	B	-
IWB72227	Tdurum_contig52015_1090	7A	0	A	B	A	B	B	B	B	B	B	B	B	A	B	A	A	A	A	A	A	A	B	A	A	-	A	A	A	B	A	B	B	A	B	A	B	B	A	A	A	A	A	B	A	A	B	-
IWB55967	RAC875_c26706_504	7A	0	A	B	A	B	B	B	B	B	B	B	B	-	B	A	A	A	A	A	A	A	B	A	A	-	A	A	A	B	A	B	B	A	B	A	B	B	A	A	A	A	A	B	A	A	B	-
IWB55311	RAC875_c22210_191	7A	2.89559	A	B	A	B	B	B	B	B	B	B	B	-	B	B	A	A	A	A	A	B	B	A	A	A	A	A	A	B	A	B	B	A	B	A	B	B	A	A	A	A	A	B	A	A	B	A
IWA7197	wsnp_Ku_c5874_10384800	7A	3.26871	A	B	A	B	B	B	B	B	B	B	B	A	B	B	A	A	A	A	A	B	B	A	A	A	A	A	A	B	A	B	B	A	B	A	B	B	A	A	A	A	A	B	A	A	B	A
IWB73239	Tdurum_contig74815_685	7A	3.26871	A	B	A	B	B	B	B	B	B	B	B	A	B	B	A	A	A	A	A	B	B	A	A	A	A	A	A	B	A	B	B	A	B	A	B	B	A	A	A	A	A	B	A	A	B	A
IWB73235	Tdurum_contig74815_1274	7A	3.26871	A	B	A	B	B	B	B	B	B	B	B	A	B	B	A	A	A	A	A	B	B	A	A	A	A	A	A	B	A	B	B	A	B	A	B	B	A	A	A	A	A	B	A	A	B	A
IWA7306	wsnp_Ku_c792_1636348	7A	3.26871	A	B	A	B	B	B	B	B	B	B	B	A	B	B	A	A	A	A	A	B	B	A	A	A	A	A	A	B	A	B	B	A	B	A	B	B	A	A	A	A	A	B	A	A	B	A
IWB29365	Excalibur_c9183_1397	7A	3.62331	A	B	A	B	B	B	B	B	B	B	B	A	B	B	A	A	A	A	A	B	B	A	A	A	A	A	A	B	A	B	B	A	B	A	B	B	A	A	A	A	A	B	A	A	B	A
IWA5337	wsnp_Ex_rep_c66939_65371026	7A	3.98826	A	B	A	B	B	B	B	B	B	-	B	A	B	B	A	A	A	A	A	B	B	A	A	A	A	A	A	B	A	B	B	A	B	A	B	B	A	A	A	A	A	B	A	A	B	A
IWB11509	BS00087471_51	7A	4.3559	A	B	A	B	B	B	B	B	B	B	B	A	B	B	A	A	A	A	A	B	B	A	A	A	A	A	A	B	A	B	B	A	B	A	B	B	A	A	A	A	A	B	A	A	B	A
IWB36251	IACX7857	7A	4.3559	A	B	A	B	B	B	B	B	B	B	B	A	B	B	A	A	A	A	A	B	B	A	A	A	A	A	A	B	A	B	B	A	B	A	B	B	A	A	A	A	A	B	A	A	B	A
IWB55808	RAC875_c25517_1067	7A	4.3559	A	B	A	B	B	B	B	B	B	B	B	A	B	B	A	A	A	A	A	B	B	A	A	A	A	A	A	B	A	B	B	A	B	A	B	B	A	A	A	A	A	B	A	A	B	A
IWB4527	BobWhite_c8796_753	7A	4.3559	A	B	A	B	B	B	B	B	B	B	B	A	B	B	A	A	A	A	A	B	B	A	A	A	A	A	A	B	A	B	B	A	B	A	B	B	A	A	A	A	A	B	A	A	B	A
IWB1481	BobWhite_c21200_281	7A	4.3559	A	B	A	B	B	B	B	B	B	B	B	A	B	B	A	A	A	A	A	B	B	A	A	A	A	A	A	B	A	B	B	A	B	A	B	B	A	A	A	A	A	B	A	A	B	A
IWB65750	TA003860-0675	7A	4.3559	A	B	A	B	B	B	B	B	B	B	B	A	B	B	A	A	A	A	A	B	B	A	A	A	A	A	A	B	A	B	B	A	B	A	B	B	A	A	A	A	A	B	A	A	B	A
IWB11727	BS00091701_51	7A	4.3559	A	B	A	B	B	B	B	B	B	B	B	A	B	B	A	A	A	A	A	B	B	A	A	A	A	A	A	B	A	B	B	A	B	A	B	B	A	A	A	A	A	B	A	A	B	A
IWB22779	Excalibur_c16355_712	7A	5.83773	-	B	A	B	B	B	B	B	B	-	A	B	B	B	A	A	A	A	A	B	B	A	A	A	A	A	A	B	A	B	B	A	B	A	B	B	A	A	A	A	A	B	A	A	B	A
IWB5820	BS00002974_51	7A	6.20003	B	B	A	B	B	B	B	B	B	B	A	B	B	B	A	A	A	A	A	B	B	A	A	A	A	A	A	B	A	B	B	A	B	A	B	B	A	A	A	A	A	B	A	A	B	A
IWB19538	Ex_c10105_526	7A	7.67097	B	B	A	B	B	B	B	B	B	B	A	B	B	B	A	A	A	A	A	B	B	A	A	A	A	A	A	B	A	B	B	A	B	B	B	B	A	A	B	A	A	B	A	A	B	A
IWA3267	wsnp_Ex_c30239_39179460	7A	7.67097	B	B	A	B	B	B	B	B	B	B	A	B	B	B	A	A	A	A	A	B	B	A	A	A	A	A	A	B	A	B	B	A	B	B	B	B	A	A	B	A	A	B	A	A	B	A
IWB35150	IAAV6131	7A	11.409	B	B	A	B	B	B	B	B	B	A	A	B	B	B	A	A	A	A	A	B	B	A	A	A	A	A	A	-	A	B	B	A	B	B	B	B	B	A	A	A	A	B	A	A	B	A
IWB8512	BS00048699_51	7A	29.8152	B	B	A	B	B	A	A	A	B	A	A	B	A	A	A	A	B	A	A	B	B	B	A	A	B	B	A	B	A	B	B	A	A	A	B	B	A	A	B	A	B	B	A	A	A	B
IWB72301	Tdurum_contig53050_286	7A	41.0149	A	B	A	B	B	A	A	A	A	A	B	B	A	A	A	A	B	B	A	A	A	B	A	A	A	B	A	A	A	B	B	A	A	A	B	B	B	A	B	A	B	B	A	A	A	B
IWB7400	BS00023055_51	7A	41.7192	A	B	A	B	B	A	A	A	A	A	B	B	A	A	A	B	B	B	A	A	A	B	A	A	A	B	A	A	A	B	B	A	A	A	B	B	B	A	B	A	B	B	A	A	A	B
IWB71609	Tdurum_contig45437_1667	7A	42.0688	A	B	A	B	B	A	A	A	A	A	B	B	A	A	A	B	B	B	A	A	A	B	A	A	A	B	A	A	A	B	B	A	A	A	B	B	B	A	B	A	B	B	A	A	A	B
IWB74024	Tdurum_contig98029_517	7A	45.7791	A	B	A	A	B	B	B	B	A	A	B	B	A	A	A	B	B	B	A	A	A	B	A	A	A	B	A	A	A	B	B	A	A	A	A	A	B	A	B	A	B	B	A	A	A	B
IWB73948	Tdurum_contig9584_624	7A	49.4894	A	B	A	A	B	B	B	B	A	A	B	B	A	A	A	B	B	B	A	A	A	B	A	A	B	B	A	A	A	B	A	A	A	A	A	A	B	B	B	A	B	B	A	A	A	B
IWB73947	Tdurum_contig9584_463	7A	49.4894	A	B	A	A	B	B	B	B	A	A	B	B	A	A	A	B	B	B	A	A	A	B	A	A	B	B	A	A	A	B	A	A	A	A	A	A	B	B	B	A	B	B	A	A	A	B
IWB73270	Tdurum_contig75475_454	7A	49.4894	A	B	A	A	B	B	B	B	A	A	B	B	A	A	A	B	B	B	A	A	A	B	A	A	B	B	A	A	A	B	A	A	A	A	A	A	B	B	B	A	B	B	A	A	A	B
IWB13340	CAP12_c2951_105	7A	49.4894	A	B	A	A	B	B	B	B	A	A	B	B	A	A	A	B	B	B	A	A	A	B	A	A	B	B	A	A	A	B	A	A	A	A	A	A	B	B	B	A	B	B	A	A	A	B
IWB68858	Tdurum_contig20214_181	7A	51.9302	A	A	A	A	B	B	B	B	A	A	B	B	A	A	A	B	B	B	A	A	A	B	A	A	B	B	A	A	A	B	A	A	A	A	A	A	B	B	B	A	B	A	A	A	A	B
IWB34476	IAAV1940	7A	51.9302	A	A	A	A	B	B	B	B	A	A	B	B	A	A	A	B	B	B	A	A	A	-	A	A	-	B	A	A	A	B	A	A	A	A	A	A	-	B	B	A	B	A	A	A	A	-
IWB73088	Tdurum_contig67992_160	7A	52.2873	A	A	A	A	B	B	B	B	A	A	A	B	A	A	A	B	B	B	A	A	A	B	A	A	B	B	A	A	A	B	A	A	A	A	A	A	B	B	B	A	B	A	A	A	A	B
IWB72688	Tdurum_contig59789_174	7A	52.2873	A	A	A	A	B	B	B	B	A	A	A	B	A	A	A	B	B	B	A	A	A	B	A	A	B	B	A	A	A	B	A	A	A	A	A	A	B	B	B	A	B	A	A	A	A	B
IWB73538	Tdurum_contig8190_280	7A	52.6445	A	A	A	A	B	B	B	B	A	A	A	B	A	A	A	B	B	B	A	A	A	B	A	A	B	B	A	A	A	B	A	A	A	A	A	A	A	B	B	A	B	A	A	A	A	B
IWB73539	Tdurum_contig8190_96	7A	52.6445	A	A	A	A	B	B	B	B	A	A	A	B	A	A	A	B	B	B	A	A	A	B	A	A	B	B	A	A	A	B	A	A	A	A	A	A	A	B	B	A	B	A	A	A	A	B
IWB8374	BS00044694_51	7A	55.2392	A	A	A	A	B	B	B	B	A	A	A	B	A	A	B	B	B	B	A	A	A	B	A	A	B	B	A	A	A	B	A	A	A	A	A	A	A	B	B	A	A	A	A	A	A	B
IWB12197	BS00102772_51	7A	55.2392	A	A	A	A	B	B	B	B	A	A	A	B	A	A	B	B	B	B	A	A	A	B	A	A	B	B	A	A	A	B	A	A	A	A	A	A	A	B	B	A	A	A	A	A	A	B
IWB12198	BS00102773_51	7A	55.2392	A	A	A	A	B	B	B	B	A	A	A	B	A	A	B	B	B	B	A	A	A	B	A	A	B	B	A	A	A	B	A	A	A	A	A	A	A	B	B	A	A	A	A	A	A	B
IWB71338	Tdurum_contig42712_284	7A	57.0385	A	A	A	A	B	B	B	B	A	A	A	B	A	B	B	B	B	B	A	A	A	B	B	B	B	B	A	A	A	B	A	A	A	A	A	A	A	B	B	A	A	A	A	A	A	B
IWB12626	BS00111112_51	7A	57.0385	A	A	A	A	B	B	B	B	A	A	A	B	A	B	B	B	B	B	A	A	A	B	B	B	B	B	A	A	A	B	A	A	A	A	A	A	A	B	B	A	A	A	A	A	A	B
IWB72200	Tdurum_contig51645_738	7A	57.0385	A	A	A	A	B	B	B	B	A	A	A	B	A	B	B	B	B	B	A	A	A	B	B	B	B	B	A	A	A	B	A	A	A	A	A	A	A	B	B	A	A	A	A	A	A	B
IWB68515	Tdurum_contig16244_105	7A	57.3931	A	A	A	A	B	B	B	B	A	A	A	B	A	B	B	B	B	B	A	A	A	B	B	B	B	B	A	A	A	B	A	A	A	A	A	A	A	B	B	A	A	A	A	A	A	B
IWB24585	Excalibur_c27503_211	7A	58.0973	A	A	A	A	B	B	B	B	A	A	A	B	A	B	B	B	B	B	A	A	A	B	B	B	B	B	A	A	A	B	A	A	A	A	B	B	A	B	B	A	A	A	A	A	A	B
IWB7484	BS00023225_51	7A	59.1538	A	A	A	A	B	B	B	B	A	A	A	B	A	B	B	B	B	B	A	A	A	B	B	B	B	B	A	A	A	B	A	A	A	A	B	B	A	B	B	A	A	A	A	A	A	A
IWB39677	Ku_c5938_4231	7A	59.1538	A	A	A	A	B	B	B	B	A	A	A	B	A	B	B	B	B	B	A	A	A	B	B	B	B	B	A	A	A	B	A	A	A	A	B	B	A	B	B	A	A	A	A	A	A	A
IWB39676	Ku_c5938_4221	7A	59.1538	A	A	A	A	B	B	B	B	A	A	A	B	A	B	B	B	B	B	A	A	A	B	B	B	B	B	A	A	A	B	A	A	A	A	B	B	A	B	B	A	A	A	A	A	A	A
IWA7201	wsnp_Ku_c5938_10491311	7A	59.1538	A	A	A	A	B	B	B	B	A	A	A	B	A	B	B	B	B	B	A	A	A	B	B	B	B	B	A	A	A	B	A	A	A	A	B	B	A	B	B	A	A	A	A	A	A	A
IWA2513	wsnp_Ex_c2017_3787478	7A	59.5034	A	A	A	A	B	B	B	B	A	A	A	B	A	B	B	B	B	B	A	A	A	B	B	B	B	B	A	A	A	B	A	A	A	A	B	B	A	B	B	A	A	A	A	A	A	A
IWB8251	BS00040929_51	7A	65.3434	A	A	A	A	B	B	B	B	A	A	A	B	A	B	B	B	B	B	A	B	A	B	B	B	B	A	A	A	A	B	A	A	B	A	B	B	A	B	B	A	A	B	A	A	A	A
IWB72710	Tdurum_contig60128_346	7A	74.0359	A	A	A	A	B	B	B	B	A	A	A	B	A	-	B	B	B	B	A	A	A	B	B	B	A	A	A	A	B	B	A	A	A	A	B	B	A	A	B	A	A	B	A	B	-	A
IWB8241	BS00040657_51	7A	74.0359	A	A	A	A	B	B	B	B	A	A	A	B	A	-	B	B	B	B	A	A	A	B	B	B	A	A	A	A	B	B	A	A	A	A	B	B	A	A	B	A	A	B	A	B	-	A
IWA6331	wsnp_JG_c227_167774	7A	75.4855	A	A	A	A	B	B	B	B	A	B	A	B	A	B	B	B	B	B	A	A	A	B	B	B	A	A	A	A	B	B	A	A	A	A	B	B	A	A	B	A	A	B	A	B	-	A
IWA7205	wsnp_Ku_c6065_10682531	7A	76.542	A	A	A	A	B	B	B	B	A	B	A	B	A	B	B	B	B	B	A	A	A	B	B	B	A	A	A	A	B	B	A	A	A	A	A	A	A	A	B	A	A	B	A	B	-	A
IWB35972	IACX481	7A	76.8892	A	A	A	A	B	B	B	B	A	B	A	B	A	B	B	B	B	B	A	A	A	B	B	B	A	A	A	A	B	B	A	A	A	A	A	A	A	A	B	A	A	B	A	B	-	A
IWB62888	RAC875_rep_c72596_466	7A	76.8892	A	A	A	A	B	B	B	B	A	B	A	B	A	B	B	B	B	B	A	A	A	B	B	B	A	A	A	A	B	B	A	A	A	A	A	A	A	A	B	A	A	B	A	B	-	A
IWB37766	JD_c6934_1038	7A	76.8892	A	A	A	A	B	B	B	B	A	B	A	B	A	B	B	B	B	B	A	A	A	B	B	B	A	A	A	A	B	B	A	A	A	A	A	A	A	A	B	A	A	B	A	B	-	A
IWB71332	Tdurum_contig42661_202	7A	76.8892	A	A	A	A	B	B	B	B	A	B	A	B	A	B	B	B	B	B	A	A	A	B	B	B	A	A	A	A	B	B	A	A	A	A	A	A	A	A	B	A	A	B	A	B	-	A
IWB45867	Kukri_c484_1877	7A	77.9456	A	A	A	A	B	B	B	B	A	B	A	B	A	B	B	B	B	-	A	A	A	B	B	B	A	A	A	A	B	B	A	B	A	A	A	A	A	A	B	A	A	B	A	B	B	A
IWB71389	Tdurum_contig43052_3851	7A	79.0171	A	A	A	A	B	B	B	B	A	B	A	B	A	B	B	B	B	B	A	A	A	B	B	B	A	A	A	A	B	B	A	B	A	A	A	A	A	A	B	A	A	B	A	B	B	A
IWB11841	BS00093896_51	7A	79.0171	A	A	A	A	B	B	B	B	A	B	A	B	A	B	B	B	B	B	A	A	A	B	B	B	A	A	A	A	B	B	A	B	A	A	A	A	A	A	B	-	A	B	A	B	B	A
IWB11840	BS00093895_51	7A	79.0171	A	A	A	A	B	B	B	B	A	B	A	B	A	B	B	B	B	B	A	A	A	B	B	B	A	A	A	A	B	B	A	B	A	A	A	A	A	A	B	A	A	B	A	B	B	A
IWB8372	BS00044593_51	7A	81.5554	A	A	A	A	B	B	B	B	A	B	A	B	A	B	B	B	B	B	A	A	A	B	B	B	A	A	A	B	B	B	A	A	A	A	A	A	A	A	B	A	A	B	A	A	B	A
IWB11895	BS00094744_51	7A	84.8207	B	A	A	A	B	B	B	B	A	B	A	B	A	B	B	A	B	B	A	A	A	B	A	A	A	A	A	B	B	B	A	A	A	A	A	A	A	A	B	A	A	B	A	A	B	B
IWB10504	BS00070827_51	7A	85.5152	B	A	A	A	B	B	B	B	A	B	A	B	A	B	B	A	B	B	A	A	A	B	A	A	A	A	A	B	B	B	A	A	A	A	A	A	A	A	B	A	A	B	A	A	B	B
IWB8180	BS00039559_51	7A	85.5152	B	A	A	A	B	B	B	B	A	B	A	-	A	B	B	A	B	B	A	A	A	B	A	A	A	A	A	B	B	B	A	A	A	A	A	A	A	A	B	A	A	B	A	A	B	B
IWB12176	BS00101427_51	7A	85.5152	B	A	A	A	B	B	B	B	A	B	A	B	A	B	B	A	B	B	A	A	A	B	A	A	A	A	A	B	B	B	A	A	A	A	A	A	A	A	B	A	A	B	A	A	B	B
IWB10647	BS00073170_51	7A	85.5152	B	A	A	A	B	B	B	B	A	B	A	B	A	B	B	A	B	B	A	A	A	B	A	A	A	A	A	B	B	B	A	A	A	A	A	A	A	A	B	A	A	B	A	A	B	B
IWB10648	BS00073171_51	7A	85.5152	B	A	A	A	B	B	B	B	A	B	A	B	A	B	B	A	B	B	A	A	A	B	A	A	A	A	A	B	B	B	A	A	A	A	A	A	A	A	B	A	A	B	A	A	B	B
IWB11693	BS00091101_51	7A	85.8648	B	A	A	A	B	B	B	B	A	B	A	B	A	B	B	A	B	B	A	A	A	B	A	A	A	A	A	B	B	B	A	A	A	A	A	A	A	A	B	A	A	B	A	A	B	B
IWB73952	Tdurum_contig96102_254	7A	86.5741	A	A	A	A	B	B	B	B	A	B	A	B	A	B	B	A	B	B	A	A	A	B	A	A	A	A	A	B	B	B	A	A	A	A	A	A	A	A	B	A	A	B	A	A	B	B
IWB71714	Tdurum_contig4676_3364	7A	86.5741	A	A	A	A	B	B	B	B	A	B	A	B	A	B	B	A	B	B	A	A	A	B	A	A	A	A	A	B	B	B	A	A	A	A	A	A	A	A	B	A	A	B	A	A	B	B
IWB68604	Tdurum_contig17020_550	7A	86.5741	A	A	A	A	B	B	B	B	A	B	A	B	A	B	B	A	B	B	A	A	A	B	A	A	A	A	A	B	B	B	A	A	A	A	A	A	A	A	B	A	A	B	A	A	B	B
IWB19533	Ex_c100454_35	7A	92.9065	A	A	A	A	B	B	B	B	A	B	A	B	A	B	B	A	A	B	A	A	A	A	A	A	A	A	B	B	B	B	A	A	B	A	A	B	A	A	B	A	A	B	A	A	B	B
IWB33920	GENE-4347_41	7A	95.0976	A	A	A	A	B	B	B	B	A	B	A	B	A	B	B	A	A	B	A	A	A	A	A	A	A	A	B	B	B	B	A	A	B	A	A	B	A	A	B	A	A	B	A	A	B	B
IWA797	wsnp_CAP11_c651_429263	7A	95.792	A	A	A	A	B	B	B	B	A	B	A	B	A	B	B	A	A	B	A	A	A	A	A	A	A	A	B	B	B	B	A	A	B	A	A	B	A	A	B	A	A	B	A	A	B	B
IWB8620	BS00052668_51	7A	95.792	A	A	A	A	B	B	B	B	A	-	A	B	A	B	B	A	A	B	A	A	A	A	A	A	A	A	B	B	B	B	A	A	B	A	A	B	A	A	B	A	A	B	A	A	B	B
IWB6761	BS00021791_51	7A	95.792	A	A	A	A	B	B	B	B	A	B	A	B	A	B	B	A	A	B	A	A	A	A	A	A	A	A	B	B	B	B	A	A	B	A	A	B	A	A	B	A	A	B	A	A	B	B
IWB8446	BS00046998_51	7A	95.792	A	A	A	A	B	B	B	B	A	B	A	B	A	B	B	A	A	B	A	A	A	A	A	A	A	A	B	B	B	B	A	A	B	A	A	B	A	A	B	A	A	B	A	A	B	B
IWB21674	Excalibur_c10563_523	7A	95.792	A	A	A	A	B	B	B	B	A	B	A	B	A	B	B	A	A	B	A	A	A	A	A	A	A	A	B	B	B	B	A	A	B	A	A	B	A	A	B	A	A	B	A	A	B	B
IWB13689	CAP7_c10133_40	7A	95.792	A	A	A	A	B	B	B	B	A	B	A	B	A	B	B	A	A	B	A	A	A	A	A	A	A	A	B	B	B	B	A	A	B	A	A	B	A	A	B	A	A	B	A	A	B	B
IWB73368	Tdurum_contig76441_240	7A	99.1055	A	A	A	A	A	B	B	B	A	B	A	B	B	B	B	A	B	B	A	A	A	A	A	A	A	A	B	B	B	B	A	A	B	A	A	B	A	A	B	A	A	B	A	A	B	B
IWA2392	wsnp_Ex_c19262_28188808	7A	99.512	A	A	A	A	A	B	B	B	A	B	A	B	B	B	B	A	B	B	A	A	A	A	A	A	A	A	B	B	B	B	A	A	B	A	A	B	A	A	B	A	A	B	A	A	B	B
IWB19819	Ex_c13716_356	7A	99.512	A	A	A	A	A	B	B	B	A	B	A	B	B	B	B	A	B	B	A	A	A	A	A	A	A	A	B	B	B	B	A	A	B	A	A	B	A	A	B	A	A	B	A	A	B	B
IWB49743	Kukri_rep_c68087_688	7A	99.512	A	A	A	A	A	B	B	B	A	B	A	B	B	B	B	A	B	B	A	A	A	A	A	A	A	A	B	B	B	B	A	A	B	A	A	B	A	A	B	A	A	B	A	A	B	B
IWB20871	Ex_c52578_44	7A	99.512	A	A	A	A	A	B	B	B	A	B	A	B	B	B	B	A	B	B	A	A	A	A	A	A	A	A	B	B	B	B	A	A	B	A	A	B	A	A	B	A	A	B	A	A	B	B
IWB9983	BS00067200_51	7A	99.512	A	A	A	A	A	B	B	B	A	B	-	B	B	B	B	A	B	B	A	A	A	-	-	A	A	A	B	B	B	B	A	A	B	A	A	B	-	-	B	A	A	B	A	-	B	B
IWB10939	BS00077560_51	7A	99.512	A	A	A	A	A	B	B	B	A	B	A	B	B	B	B	A	B	B	A	A	A	A	A	A	A	A	B	B	B	B	A	A	B	A	A	B	A	A	B	A	A	B	A	A	B	B
IWB10978	BS00077955_51	7A	99.512	A	A	A	A	A	B	B	B	A	B	A	B	B	B	B	A	B	B	A	A	A	A	A	A	A	A	B	B	B	B	A	A	B	A	A	B	A	A	B	A	A	B	A	A	B	B
IWB9156	BS00063933_51	7A	99.512	A	A	A	A	A	B	B	B	A	-	A	B	B	B	B	A	B	B	A	A	A	A	A	A	A	A	B	B	B	B	A	A	B	A	A	B	A	A	B	A	A	B	A	A	B	B
IWB9049	BS00063383_51	7A	99.512	A	A	A	A	A	B	B	B	A	B	A	B	B	B	B	A	B	B	A	A	A	A	A	A	A	A	B	B	B	B	A	A	B	A	A	B	A	A	B	A	A	B	A	A	B	B
IWB11088	BS00079590_51	7A	99.512	A	A	A	A	A	-	B	B	A	B	A	B	B	B	B	A	B	B	A	A	A	A	A	A	A	A	B	B	B	B	A	A	B	A	A	B	A	A	B	A	A	B	A	A	B	B
IWA7472	wsnp_Ku_rep_c70256_69818445	7A	99.512	A	A	A	A	A	B	B	B	A	B	A	B	B	B	B	A	B	B	A	A	A	A	A	A	A	A	B	B	B	B	A	A	B	A	A	B	A	A	B	A	A	B	A	A	B	B
IWB57300	RAC875_c37565_396	7A	99.512	A	A	A	A	A	B	B	B	A	B	A	B	B	B	B	A	B	B	A	A	A	A	A	A	A	A	B	B	B	B	A	A	B	A	A	B	A	A	B	A	A	B	A	A	B	B
IWB69646	Tdurum_contig28838_226	7A	99.512	A	A	A	A	A	B	B	B	A	B	A	B	B	B	B	A	B	B	A	A	A	A	A	A	A	A	B	B	B	B	A	A	B	A	A	B	A	A	B	A	A	B	A	A	B	B
IWB65015	RFL_Contig5478_741	7A	99.512	A	A	A	A	A	B	B	B	A	B	A	B	B	B	B	A	B	B	A	A	A	A	A	A	A	A	B	B	B	B	A	A	B	A	A	B	A	A	B	A	A	B	A	A	B	B
IWA7932	wsnp_Ra_c428_904568	7A	99.512	A	A	A	A	A	B	B	B	A	B	A	B	B	B	B	A	B	B	A	A	A	A	A	A	A	A	B	B	B	B	A	A	B	A	A	B	A	A	B	A	A	B	A	A	B	B
IWB55534	RAC875_c23581_105	7A	99.512	A	A	A	A	A	B	B	B	A	B	A	B	B	B	B	A	B	B	A	A	A	A	A	A	A	A	B	B	B	B	A	A	B	A	A	B	A	A	B	A	A	B	A	A	B	B
IWB9602	BS00065647_51	7A	99.512	A	A	A	A	A	B	B	B	A	B	A	B	B	B	B	A	B	B	A	A	A	A	A	A	A	A	B	B	B	B	A	A	B	A	A	B	A	A	B	A	A	B	A	A	B	B
IWA788	wsnp_CAP11_c592_400447	7A	99.512	A	A	A	A	A	B	B	B	A	B	A	B	B	B	B	A	B	B	A	A	A	A	A	A	A	A	B	B	B	B	A	A	B	A	A	B	A	A	B	A	A	B	A	A	B	B
IWB8022	BS00035678_51	7A	99.512	A	A	A	A	A	B	B	B	A	B	A	B	B	B	B	A	B	B	A	A	A	A	A	A	A	A	B	B	B	B	A	A	B	A	A	B	A	A	B	A	A	B	A	A	B	B
IWB20116	Ex_c21222_313	7A	99.8617	A	A	A	A	A	B	B	B	A	B	A	B	B	B	B	A	B	B	A	A	A	A	A	A	A	A	B	B	B	B	A	A	B	A	A	B	A	A	B	A	A	B	A	A	B	B
IWB73164	Tdurum_contig70105_162	7A	99.8617	A	A	A	A	A	B	B	B	A	B	A	B	B	B	B	A	B	B	A	A	A	A	A	A	A	A	B	B	B	B	A	A	B	A	A	B	A	A	B	A	A	B	A	A	B	B
IWB3817	BobWhite_c5396_296	7A	101.674	A	A	A	A	A	B	B	B	A	B	A	B	B	B	B	A	B	B	A	A	A	A	A	A	B	A	B	B	B	B	A	A	B	A	A	B	A	A	B	B	A	B	A	A	B	B
IWB46119	Kukri_c5101_2636	7A	104.477	A	A	A	A	A	-	A	A	A	B	A	B	B	B	B	A	B	B	A	A	A	A	A	A	B	A	B	-	B	B	A	A	B	A	A	B	A	A	B	B	A	B	A	A	B	A
IWB14050	CAP7_c3756_190	7A	104.477	A	A	A	A	A	-	A	A	A	B	A	B	B	B	B	A	B	B	A	A	A	A	A	A	B	A	B	-	B	B	A	A	B	A	A	B	A	A	B	B	A	B	A	A	B	A
IWB8647	BS00054416_51	7A	104.477	A	A	A	A	A	-	A	A	A	B	A	B	B	B	B	A	B	B	A	A	A	A	-	A	B	-	B	-	B	B	A	A	B	A	A	B	A	A	B	B	A	B	A	A	B	A
IWA3843	wsnp_Ex_c42836_49314564	7A	105.596	A	A	A	A	A	-	A	A	A	B	A	B	B	B	B	A	B	B	A	A	A	A	A	A	B	A	B	-	A	B	A	A	B	A	A	B	A	A	B	B	A	B	A	A	B	A
IWB34158	GENE-4769_448	7A	105.596	A	A	A	A	A	-	A	A	A	B	A	B	B	B	B	A	B	B	A	A	A	A	A	A	B	A	B	-	A	B	A	A	B	A	A	B	A	A	B	B	A	B	A	A	B	A
IWB14967	CAP8_c8768_51	7A	106.683	A	A	A	A	A	-	A	A	A	B	A	B	B	B	B	A	B	B	A	A	A	A	A	A	B	A	B	-	A	B	A	A	B	A	A	B	A	A	B	B	A	B	A	A	B	A
IWA1834	wsnp_Ex_c1395_2672221	7A	106.683	A	A	A	A	A	-	A	A	A	B	A	B	B	B	B	A	B	B	A	A	A	A	A	A	B	A	B	-	A	B	A	A	B	A	A	B	A	A	B	B	A	B	A	A	B	A
IWB59123	RAC875_c5549_149	7A	106.683	A	A	A	A	A	-	A	A	A	B	A	B	B	B	B	A	B	B	A	A	A	A	A	A	B	A	B	-	A	B	A	A	B	A	A	B	A	A	B	B	A	B	A	A	B	A
IWB11124	BS00080365_51	7A	107.447	A	A	A	A	A	-	A	A	A	B	A	B	B	B	B	A	B	B	A	A	A	A	A	A	B	A	B	-	A	B	A	A	B	A	A	B	A	A	B	B	A	B	A	A	B	A
IWB36186	IACX72	7A	107.447	A	A	A	A	A	-	A	A	A	B	A	B	B	B	B	A	B	B	A	A	A	A	A	A	B	A	B	-	A	B	A	A	B	A	A	B	A	A	B	B	A	B	A	A	B	A
IWB7607	BS00026056_51	7A	109.704	A	B	A	A	A	A	A	A	A	-	A	B	B	B	B	A	B	B	B	A	A	A	A	A	B	A	B	-	A	B	A	A	B	A	A	B	A	A	B	B	A	B	A	A	B	A
IWB51323	Ra_c18741_604	7A	110.061	A	B	A	A	A	-	A	A	A	B	A	B	B	B	B	A	B	B	B	A	A	A	A	A	B	B	B	-	A	B	A	A	B	A	A	B	A	A	B	B	A	B	A	A	B	A
IWB9558	BS00065462_51	7A	110.061	A	B	A	A	A	-	A	A	A	B	A	B	B	B	B	A	B	B	B	A	A	A	A	A	B	B	B	-	A	B	A	A	B	A	A	B	A	A	B	B	A	B	A	A	B	A
IWA4601	wsnp_Ex_c7001_12062578	7A	114.837	B	A	B	A	A	-	-	-	A	B	A	B	B	B	B	A	B	B	B	B	A	A	A	A	B	B	B	-	A	B	A	A	B	B	A	A	A	A	B	B	A	A	A	A	B	A
IWB7547	BS00024619_51	7A	116.33	B	A	B	A	A	-	-	-	A	B	A	B	B	B	B	A	B	B	B	B	A	A	A	A	B	B	B	-	B	B	A	A	B	A	A	A	A	A	B	B	A	A	A	A	B	A
IWA8073	wsnp_Ra_c7969_13600474	7A	116.695	B	A	B	A	A	-	-	-	B	B	A	B	B	B	B	A	B	B	B	B	A	A	A	A	B	B	B	-	B	B	A	A	B	A	A	A	A	A	B	B	A	A	A	A	B	A
IWA448	wsnp_BF293181A_Ta_2_4	7A	118.918	B	A	B	A	A	-	-	-	B	B	A	B	B	B	B	A	B	B	B	B	A	A	A	A	B	B	B	-	B	B	A	A	B	A	A	A	A	B	B	B	A	A	A	A	B	A
IWA4996	wsnp_Ex_c9982_16429661	7A	118.918	B	A	B	A	A	-	-	-	B	B	A	B	B	B	B	A	B	B	B	B	A	A	A	A	B	B	B	-	B	B	A	A	B	A	A	A	A	B	B	B	A	A	A	A	B	A
IWB8028	BS00035807_51	7A	120.411	B	A	-	A	A	-	-	-	B	A	A	B	B	B	B	A	B	B	B	B	A	A	B	B	B	B	B	-	B	B	A	A	B	A	A	A	A	B	B	B	A	A	A	A	B	A
IWB10812	BS00075525_51	7A	120.411	B	A	-	A	A	-	-	-	B	A	A	B	B	B	B	A	B	B	B	B	A	A	B	B	B	B	B	-	B	B	A	A	B	A	A	A	A	B	B	B	A	A	A	A	B	A
IWB213	BobWhite_c11374_530	7A	120.411	B	A	-	A	A	-	-	-	B	A	A	B	B	B	B	A	B	B	B	B	A	A	B	B	B	B	B	-	B	B	A	A	B	A	A	A	A	B	B	B	A	A	A	A	B	A
IWB53764	RAC875_c13696_226	7A	121.141	B	A	-	A	A	-	-	-	B	A	A	B	B	B	B	A	B	B	B	B	A	A	B	B	B	B	B	-	B	B	A	A	B	A	A	A	A	B	B	B	A	A	A	A	B	A
IWB34648	IAAV3025	7A	121.141	B	A	-	A	A	-	-	-	B	A	A	B	B	B	B	A	B	B	B	B	A	A	B	B	B	B	B	-	B	B	A	A	B	A	A	A	A	B	B	B	A	A	A	A	B	A
IWA808	wsnp_CAP11_c78_114341	7A	121.141	B	A	-	A	A	-	-	-	B	A	A	B	B	B	B	A	B	B	B	B	A	A	B	B	B	B	B	-	B	B	A	A	B	A	A	A	A	B	B	B	A	A	A	A	B	A
IWB35162	IAAV6180	7A	121.141	B	A	-	A	A	-	-	-	B	A	A	B	B	B	B	A	B	B	B	B	A	A	B	B	B	B	B	-	B	B	A	A	B	A	A	A	A	B	B	B	A	A	A	A	B	A
IWB9639	BS00065822_51	7A	123.415	B	A	-	A	A	B	B	B	B	A	A	B	B	B	B	A	B	B	B	B	A	A	B	B	B	B	B	-	B	B	A	A	B	A	A	A	A	B	B	A	A	A	A	A	A	A
IWB71633	Tdurum_contig45680_434	7A	123.775	-	A	-	A	A	B	B	B	B	-	A	B	B	B	B	A	B	B	B	B	A	A	B	B	B	B	B	-	B	B	A	A	B	A	A	A	A	B	B	A	A	A	A	A	A	A
IWB39099	Ku_c29856_132	7A	124.87	-	A	-	A	A	B	B	B	B	A	A	B	B	B	B	A	B	B	B	B	A	A	B	B	B	B	B	-	B	B	A	A	B	A	A	A	A	B	B	A	A	A	A	A	A	A
IWB39100	Ku_c29856_174	7A	124.87	-	A	-	A	A	B	B	B	B	A	A	B	B	B	B	A	B	B	B	B	A	A	B	B	B	B	B	-	B	B	A	A	B	A	A	A	A	B	B	A	A	A	A	A	A	A
IWB58316	RAC875_c47130_120	7A	126.794	-	A	B	A	-	B	B	B	A	A	A	B	B	B	B	A	B	B	B	B	A	-	A	A	B	B	A	B	B	B	A	A	B	A	A	A	A	B	B	A	A	A	A	A	A	A
IWB4809	BobWhite_rep_c49790_351	7A	127.905	-	A	B	A	A	B	B	B	A	A	A	B	B	B	B	A	B	B	B	B	A	A	A	A	B	B	A	B	B	B	A	A	B	A	A	A	A	B	B	A	A	A	A	A	A	A
IWA593	wsnp_BM134363A_Ta_2_4	7A	127.905	-	A	B	A	A	B	B	B	A	A	A	B	B	B	B	A	B	B	B	B	A	A	A	A	B	B	A	-	B	B	A	A	B	A	A	A	A	B	B	A	A	A	A	A	-	A
IWB25077	Excalibur_c31216_744	7A	127.905	-	A	B	A	A	B	B	B	A	A	A	B	B	B	B	A	B	B	B	B	A	A	A	A	B	B	A	-	B	B	A	A	B	A	A	A	A	B	B	A	A	A	A	A	-	A
IWB6963	BS00022202_51	7A	130.145	-	A	B	A	A	B	B	B	A	A	A	B	B	B	B	A	B	B	B	B	A	A	A	A	B	B	A	-	B	B	A	A	B	A	A	A	A	B	B	A	A	A	A	A	-	A
IWB10968	BS00077891_51	7A	130.145	-	A	B	A	A	B	B	B	A	A	A	B	B	B	B	A	B	B	B	B	A	A	A	A	B	B	A	-	B	B	A	A	B	A	A	A	A	B	B	A	A	A	A	A	-	A
IWB73705	Tdurum_contig8615_370	7A	132.402	B	A	B	A	A	B	B	B	A	A	A	B	B	B	B	A	B	B	B	A	A	A	A	-	B	B	A	A	B	B	A	A	B	A	A	A	A	B	B	B	A	A	A	A	B	A
IWB11812	BS00093512_51	7A	133.097	B	A	B	A	A	-	B	B	A	A	A	B	B	B	B	A	B	B	B	A	A	A	A	-	B	B	A	A	B	B	A	A	B	A	A	A	A	B	B	B	A	A	A	A	B	A
IWB72845	Tdurum_contig61966_1069	7A	133.097	B	A	B	A	A	B	B	B	A	A	A	B	B	B	B	A	B	B	B	A	A	A	A	-	B	B	A	A	B	B	A	A	B	A	A	A	A	B	B	B	A	A	A	A	B	A
IWA2776	wsnp_Ex_c23102_32328852	7A	133.097	B	A	B	A	A	B	B	B	A	A	A	B	B	B	B	A	B	B	B	A	A	A	A	-	B	B	A	A	B	B	A	A	B	A	A	A	A	B	B	B	A	A	A	A	B	A
IWA2775	wsnp_Ex_c23102_32328851	7A	133.097	B	A	B	A	A	B	B	B	A	A	A	B	B	B	B	A	B	B	B	A	A	A	A	-	B	B	A	A	B	B	A	A	B	A	A	A	A	B	B	B	A	A	A	A	B	A
IWB50294	Kukri_rep_c74538_62	7A	133.442	B	A	B	A	A	B	B	B	A	A	A	B	B	B	B	A	B	B	B	A	A	A	A	-	B	B	A	A	B	B	A	A	B	A	A	A	A	B	B	B	A	A	A	A	B	A
IWA5489	wsnp_Ex_rep_c68047_66792559	7A	133.442	B	A	B	A	A	B	B	B	A	A	A	B	B	B	B	A	B	B	B	A	A	A	A	-	B	B	A	A	B	B	A	A	B	A	A	A	A	B	B	B	A	A	A	A	B	A
IWB73139	Tdurum_contig69067_405	7A	134.491	B	A	B	A	A	B	B	B	A	A	A	B	B	B	B	A	B	B	B	A	A	A	A	-	B	B	A	B	B	B	A	A	B	A	A	A	A	B	B	B	A	A	A	A	B	A
IWB11909	BS00094965_51	7A	138.574	B	A	B	A	A	B	B	B	A	A	A	B	B	B	B	A	B	A	B	A	A	A	A	-	B	B	A	B	A	B	A	A	B	A	A	A	A	B	B	B	A	A	A	A	B	A
IWB37023	JD_c149_673	7A	139.645	B	A	B	A	A	B	B	B	A	A	A	B	B	B	B	A	B	A	B	B	A	A	A	-	B	B	A	B	A	B	A	A	B	A	A	A	A	B	B	B	A	A	A	A	B	A
IWB11533	BS00087915_51	7A	139.645	B	A	B	A	A	B	B	B	A	A	A	B	B	B	B	A	B	A	B	B	A	A	A	-	B	B	A	B	A	B	A	A	B	A	A	A	A	B	B	B	A	A	A	A	B	A
IWB21290	Ex_c7495_807	7A	139.645	B	A	B	A	A	B	B	B	A	A	A	B	B	B	B	A	B	A	B	B	A	A	A	-	B	B	A	B	A	B	A	A	B	A	A	A	A	B	B	B	A	A	A	A	B	A
IWB4998	BobWhite_rep_c52270_315	7A	139.645	B	A	B	A	A	B	B	B	A	A	A	B	B	B	B	A	B	A	B	B	A	A	A	-	B	B	A	B	A	B	A	A	B	A	A	A	A	B	B	B	A	A	A	A	B	A
IWA1031	wsnp_CAP7_c1321_664478	7A	141.471	B	A	B	A	A	B	B	B	A	A	A	B	B	-	B	A	B	A	B	B	A	A	A	A	B	B	A	B	A	B	A	A	B	A	A	A	A	B	B	B	A	A	A	A	A	A
IWA1032	wsnp_CAP7_c1321_664480	7A	141.471	B	A	B	A	A	B	B	B	A	A	A	B	B	-	B	A	B	A	B	B	A	A	A	A	B	B	A	B	A	B	A	A	B	A	A	A	A	B	B	B	A	A	A	A	A	A
IWB36250	IACX7848	7A	141.811	B	A	B	A	A	B	B	B	A	A	A	B	B	-	B	A	B	A	B	B	A	A	A	A	B	B	A	B	A	B	A	A	B	A	A	A	A	B	B	B	A	A	A	A	A	A
IWB52523	Ra_c70829_369	7A	142.153	B	A	B	A	A	B	B	B	A	-	A	B	B	-	B	A	B	A	B	-	A	A	A	A	B	B	A	B	A	B	A	A	B	A	A	A	A	B	B	B	A	A	A	A	A	A
IWB52521	Ra_c70829_1329	7A	142.153	B	A	B	A	A	B	B	B	A	A	A	B	B	-	B	A	B	A	B	-	A	A	A	A	B	B	A	B	A	B	A	A	B	A	A	A	A	B	B	B	A	A	A	A	A	A
IWB35048	IAAV5578	7A	142.505	B	A	B	A	A	B	B	B	A	A	A	B	B	-	B	A	B	A	B	-	A	A	A	A	B	B	A	B	A	B	A	A	B	A	A	A	A	B	B	B	A	A	A	A	A	A
IWB50776	Ra_c105310_660	7A	142.505	B	A	B	A	A	B	B	B	A	A	A	B	B	-	B	A	B	A	B	-	A	A	A	A	B	B	A	B	A	B	A	A	B	A	A	A	A	B	B	B	A	A	A	A	A	A
IWB35597	IAAV9161	7A	142.505	B	A	B	A	A	B	B	B	A	A	A	B	B	-	B	A	B	A	B	-	A	A	A	A	B	B	A	B	A	B	A	A	B	A	A	A	A	B	B	B	A	A	A	A	A	A
IWA5167	wsnp_Ex_rep_c108367_91621570	7A	142.505	B	A	B	A	A	B	B	B	A	A	A	B	B	-	B	A	B	A	B	-	A	A	A	A	B	B	A	B	A	B	A	A	B	A	A	A	A	B	B	B	A	A	A	A	A	A
IWB66083	TA006300-0258	7A	152.104	B	A	B	A	-	B	B	B	A	-	A	B	B	B	B	A	B	A	B	A	A	A	A	A	B	B	A	B	A	B	A	A	B	A	A	A	A	B	B	B	A	A	A	A	A	B
IWB34095	GENE-4672_55	7A	152.818	B	A	B	A	A	B	B	B	A	A	A	B	B	B	B	A	B	A	B	A	A	A	A	A	B	B	A	B	A	B	A	A	B	A	A	A	A	B	B	B	A	A	A	A	A	B
IWB9043	BS00063363_51	7A	159.201	B	B	B	B	A	B	B	B	B	A	A	B	B	B	B	A	B	B	B	A	A	A	A	A	B	B	A	B	A	B	A	A	B	A	B	B	A	-	B	B	A	A	A	A	A	B
IWB72397	Tdurum_contig54832_139	7A	164.083	B	A	B	B	A	B	B	B	B	A	A	B	B	B	B	A	B	-	B	A	A	A	A	A	-	-	A	B	A	A	A	A	-	A	B	B	A	-	B	A	A	A	A	A	A	B
IWB46674	Kukri_c57593_79	7A	169.366	B	B	B	B	A	B	B	B	B	A	A	B	B	B	B	A	A	B	B	A	A	A	A	A	B	B	B	B	A	A	A	A	B	A	B	B	A	B	B	A	A	B	A	A	A	B
IWB50566	Kukri_rep_c98227_230	7A	169.366	B	B	B	B	A	B	B	B	B	A	A	B	B	B	B	A	A	B	B	A	A	A	A	A	B	B	B	B	A	A	A	A	B	A	B	B	A	B	B	A	A	B	A	A	A	B
IWB30790	Excalibur_rep_c66918_307	7A	169.366	B	B	B	B	A	B	B	B	B	A	A	B	B	B	B	A	A	B	B	A	A	A	A	A	B	B	B	B	A	A	A	A	B	A	B	B	A	B	B	A	A	B	A	A	A	B
IWB35043	IAAV5550	7A	183.922	B	B	A	B	A	B	B	B	B	A	B	B	A	A	A	A	A	B	B	A	B	B	B	B	B	B	B	B	A	A	A	B	B	A	B	B	A	B	B	A	A	A	A	A	A	B
IWA4887	wsnp_Ex_c916_1767286	7A	183.922	B	B	A	B	A	B	B	B	B	A	B	B	A	A	A	A	A	B	B	A	B	B	B	B	B	B	B	B	A	A	A	B	B	A	B	B	A	B	B	A	A	A	A	A	A	B
IWB43619	Kukri_c28968_130	7A	183.922	B	B	A	B	A	B	B	B	B	A	B	B	A	A	A	A	A	B	B	A	B	B	B	B	B	B	B	B	A	A	A	B	B	A	B	B	A	B	B	A	A	A	A	A	A	B
IWA4434	wsnp_Ex_c6142_10746442	7A	183.922	B	B	A	B	A	B	B	B	B	A	B	B	A	A	A	A	A	B	B	A	B	B	B	B	B	B	B	B	A	A	A	B	B	A	B	B	A	B	B	A	A	A	A	A	A	B
IWB7611	BS00026122_51	7A	183.922	B	B	A	B	A	B	B	B	B	A	B	B	A	A	A	A	A	B	B	A	B	B	B	B	B	B	B	B	A	A	A	B	B	A	B	B	A	B	B	A	A	A	A	A	A	B
IWB10852	BS00076120_51	7A	183.922	B	B	A	B	A	B	B	B	B	A	B	B	A	A	A	A	A	B	B	A	B	B	B	B	B	B	B	B	A	A	A	B	B	A	B	B	A	B	B	A	A	A	A	A	A	B
IWB39426	Ku_c43151_811	7A	183.922	B	B	A	B	A	B	B	B	B	A	B	B	A	A	A	A	A	B	B	A	B	B	B	B	B	B	B	B	A	A	A	B	B	A	B	B	A	B	B	A	A	A	A	A	A	B
IWB34223	GENE-4895_101	7A	190.204	B	B	A	B	A	B	B	B	B	A	B	B	A	A	A	A	A	B	B	A	B	B	A	A	B	B	B	B	A	A	A	B	B	A	B	B	B	B	B	A	A	A	A	B	A	B
IWA179	wsnp_BE445506A_Ta_2_2	7A	190.204	B	B	A	B	A	B	B	B	B	A	B	B	A	A	A	A	A	B	B	A	B	B	A	A	B	B	B	B	A	A	A	B	B	A	B	B	B	B	B	A	A	A	A	B	A	B
IWB7367	BS00023003_51	7A	191.613	B	B	A	B	A	B	B	B	B	A	B	B	A	A	A	A	A	B	B	A	B	B	A	A	B	A	B	B	A	A	A	B	B	A	B	B	B	B	B	A	A	A	A	B	B	B
IWB10428	BS00069988_51	7A	193.727	B	B	A	B	A	B	B	B	B	A	B	B	A	A	A	A	A	B	B	A	B	B	A	A	B	A	B	B	A	A	A	B	B	A	B	B	B	B	B	A	A	A	A	B	B	A
IWB6923	BS00022137_51	7A	193.727	B	B	A	B	A	B	B	B	B	A	B	B	A	A	A	A	A	B	B	A	B	B	A	A	B	A	B	B	A	A	A	B	B	A	B	B	B	B	B	A	A	A	A	B	B	A
IWB11407	BS00085421_51	7A	194.067	B	B	A	B	A	B	B	B	B	A	B	B	A	A	A	A	A	B	B	A	B	B	A	A	B	A	B	B	A	A	A	B	B	A	B	B	B	B	B	A	A	A	A	B	B	A
IWB73420	Tdurum_contig77505_779	7A	194.067	B	B	A	B	A	B	B	B	B	A	B	B	A	A	A	A	A	B	B	A	B	B	A	A	B	A	B	B	A	A	A	B	B	A	B	B	B	B	B	A	A	A	A	B	B	A
IWB10370	BS00069019_51	7A	194.067	B	B	A	B	A	B	B	B	B	-	B	B	A	A	A	A	A	B	B	A	B	B	A	A	B	A	B	B	A	A	A	B	B	A	B	B	B	B	B	A	A	A	A	B	B	A
IWB66765	Tdurum_contig10827_1008	7A	194.067	B	B	A	B	A	B	B	B	B	A	B	B	A	A	A	A	A	B	B	A	B	B	A	A	B	A	B	B	A	A	A	B	B	A	B	B	B	B	B	A	A	A	A	B	B	A
IWB65192	RFL_Contig602_627	7A	194.067	B	B	A	B	A	B	B	B	B	A	B	B	A	A	A	A	A	B	B	A	B	B	A	A	B	A	B	B	A	A	A	B	B	A	B	B	B	B	B	A	A	A	A	B	B	A
IWB68321	Tdurum_contig14983_299	7A	194.067	B	B	A	B	A	B	B	B	B	A	B	B	A	A	A	A	A	B	B	A	B	B	A	A	B	A	B	B	A	A	A	B	B	A	B	B	B	B	B	A	A	A	A	B	B	A
IWB64853	RFL_Contig4980_884	7A	194.067	B	B	A	B	A	B	B	B	B	A	B	B	A	A	A	A	A	B	B	A	B	B	A	A	B	A	B	B	A	A	A	B	B	A	B	B	B	B	B	A	A	A	A	B	B	A
IWB72104	Tdurum_contig50628_448	7A	194.067	B	B	A	B	A	B	B	B	B	A	B	B	A	A	A	A	A	B	B	A	B	B	A	A	B	A	B	B	A	A	A	B	B	A	B	B	B	B	B	A	A	A	A	B	B	A
IWB71625	Tdurum_contig45618_1089	7A	194.067	B	B	A	B	A	B	B	B	B	A	B	B	A	A	A	A	A	B	B	A	B	B	A	A	B	A	B	B	A	A	A	B	B	A	B	B	B	B	B	A	A	A	A	B	B	A
IWB65211	RFL_Contig6075_1128	7B	0	B	A	A	B	A	A	A	A	A	B	B	A	B	B	A	B	B	B	B	A	B	B	A	A	A	A	B	A	A	B	A	B	B	B	B	B	A	A	B	B	B	B	-	A	B	B
IWB72574	Tdurum_contig57324_104	7B	0	B	A	A	B	A	A	A	A	A	B	B	A	B	B	A	B	B	B	B	A	B	B	A	A	A	A	B	A	A	B	A	B	B	B	B	B	A	A	B	B	B	B	-	A	B	B
IWB20228	Ex_c24068_652	7B	5.79469	B	A	A	B	A	A	A	A	B	B	B	A	B	B	A	B	A	B	B	A	A	B	A	A	A	A	B	A	A	B	A	B	B	B	B	B	A	B	B	B	B	B	A	B	A	B
IWB74023	Tdurum_contig98005_345	7B	7.56839	A	A	A	B	A	A	A	A	B	B	B	A	B	B	A	B	A	B	B	A	A	B	A	A	A	B	B	A	A	A	A	B	B	B	B	A	A	B	B	B	B	B	A	B	A	B
IWB74022	Tdurum_contig98005_272	7B	7.56839	A	A	A	B	A	A	A	A	B	B	B	A	B	B	A	B	A	B	B	A	A	B	A	A	A	B	B	A	A	A	A	B	B	B	B	A	A	B	B	B	B	B	A	B	A	B
IWB72316	Tdurum_contig5352_556	7B	7.56839	A	A	A	B	A	A	A	A	B	B	B	A	B	B	A	B	A	B	B	A	A	B	A	A	A	B	B	A	A	A	A	B	B	B	B	A	A	B	B	B	B	B	A	B	A	B
IWB73685	Tdurum_contig85266_280	7B	8.63233	A	A	A	B	A	A	A	A	B	B	B	A	B	B	A	B	A	B	B	A	A	B	-	A	A	B	B	A	A	A	A	B	B	B	B	A	A	B	B	B	B	B	A	B	A	B
IWB70085	Tdurum_contig30677_55	7B	8.63233	A	A	A	B	A	A	A	A	B	B	B	A	B	B	A	B	A	B	B	A	A	B	A	A	A	B	B	A	A	A	A	B	B	B	B	A	A	B	B	B	B	B	A	B	A	B
IWB70086	Tdurum_contig30677_66	7B	8.63233	A	A	A	B	A	A	A	A	B	B	B	A	B	B	A	B	A	B	B	A	A	B	A	A	A	B	B	A	A	A	A	B	B	B	B	A	A	B	B	B	B	B	A	B	A	B
IWB73917	Tdurum_contig9465_925	7B	12.7458	A	B	A	B	A	B	A	A	B	B	B	A	B	B	A	B	A	B	B	A	A	B	B	B	A	B	B	B	A	A	A	B	B	B	B	A	A	B	B	B	B	B	B	B	A	B
IWB73519	Tdurum_contig81683_217	7B	38.8086	A	B	-	B	A	B	A	-	B	B	B	A	B	B	A	A	B	B	A	A	A	B	B	B	A	B	-	B	A	A	B	B	B	B	B	B	B	B	A	A	A	A	B	A	A	B
IWB43046	Kukri_c24895_402	7B	39.1607	A	B	-	B	A	B	A	-	B	B	B	A	B	B	A	A	B	B	A	A	A	B	B	B	A	B	-	B	A	A	B	B	B	B	B	B	B	B	A	A	A	A	B	A	A	B
IWA8138	wsnp_Ra_rep_c108473_91741819	7B	39.1607	A	B	-	B	A	B	A	-	B	B	B	A	B	B	A	A	B	B	A	A	A	B	B	B	A	B	-	B	A	A	B	B	B	B	B	B	B	B	A	A	A	A	B	A	A	B
IWB8652	BS00054881_51	7B	39.1607	A	B	-	B	A	B	A	-	B	B	B	A	B	B	A	A	B	B	A	A	A	B	B	B	A	B	-	B	A	A	B	B	B	B	B	B	B	B	A	A	A	A	B	A	A	B
IWB40119	Ku_c884_2297	7B	39.1607	A	B	B	B	A	B	A	-	B	B	B	A	B	B	A	A	B	B	A	A	A	B	B	B	A	B	-	B	A	A	B	B	B	B	B	B	B	B	A	A	A	A	B	A	A	B
IWB40118	Ku_c884_1017	7B	39.1607	A	B	-	B	A	B	A	-	B	B	B	A	B	B	A	A	B	B	A	A	A	B	B	B	A	B	-	B	A	A	B	B	B	B	B	B	B	B	A	A	A	A	B	A	A	B
IWB40120	Ku_c884_736	7B	39.1607	A	B	B	B	A	B	A	-	B	B	B	A	B	B	A	A	B	B	A	A	A	B	B	B	A	B	-	B	A	A	B	B	B	B	B	B	B	B	A	A	A	A	B	A	A	B
IWB9254	BS00064343_51	7B	39.1607	A	B	-	B	A	B	A	-	B	B	B	A	B	B	A	A	B	B	A	A	A	B	B	B	A	B	-	B	A	A	B	B	B	B	B	B	B	B	A	A	A	A	B	A	A	B
IWB68833	Tdurum_contig1969_254	7B	39.5153	A	B	-	B	A	B	A	-	B	B	B	A	B	B	A	A	B	B	A	A	A	B	B	B	A	B	-	B	A	A	B	B	B	B	B	B	B	B	A	A	A	A	B	A	-	B
IWB64830	RFL_Contig492_751	7B	39.5153	A	B	-	B	A	B	A	-	B	B	B	A	B	B	A	A	B	B	A	A	A	B	B	B	A	B	-	B	A	A	B	B	B	B	B	B	B	B	A	A	A	A	B	A	A	B
IWA3572	wsnp_Ex_c36325_44308589	7B	40.5945	A	B	-	B	A	B	A	-	B	B	B	A	B	B	A	A	B	B	A	A	A	B	B	B	A	B	-	B	A	A	B	B	B	B	B	B	B	B	A	A	A	A	B	A	-	B
IWB71980	Tdurum_contig49572_643	7B	40.5945	A	B	-	B	A	B	A	-	B	B	B	A	B	B	A	A	B	B	A	A	A	B	B	B	A	B	-	B	A	A	B	B	B	B	B	B	B	B	A	A	A	A	B	A	-	B
IWB72146	Tdurum_contig51024_1234	7B	40.5945	A	B	-	B	A	B	A	-	B	B	B	A	B	B	A	A	B	B	A	A	A	B	B	B	A	B	-	B	A	A	B	B	B	B	B	B	B	B	A	A	A	A	B	A	-	B
IWB3251	BobWhite_c42613_62	7B	40.9517	A	B	-	B	A	B	A	-	B	B	B	A	B	B	A	A	B	B	A	A	A	B	B	B	A	B	-	B	A	A	B	B	B	B	B	B	B	B	A	A	A	A	B	A	-	B
IWB34205	GENE-4862_1104	7B	40.9517	A	B	-	B	A	B	A	-	B	B	B	A	B	B	A	A	B	B	A	A	A	B	B	B	A	B	-	B	A	A	B	B	B	B	B	B	B	B	A	A	A	A	B	A	-	B
IWB20808	Ex_c48378_568	7B	46.1285	A	B	-	A	A	B	A	-	B	-	B	A	B	B	B	A	B	B	A	B	A	B	A	A	A	B	-	B	A	A	B	B	B	B	B	B	B	B	A	A	A	A	B	A	B	B
IWB71513	Tdurum_contig44261_127	7B	47.6103	A	B	-	A	A	A	A	-	B	-	B	A	B	B	B	A	B	B	A	B	A	B	A	A	A	B	B	B	A	A	B	B	B	B	B	B	B	B	A	A	A	A	B	B	B	B
IWB70399	Tdurum_contig32954_195	7B	47.6103	A	B	-	A	A	A	A	-	B	-	B	A	B	B	B	A	B	B	A	B	A	B	A	A	A	B	B	B	A	A	B	B	B	B	B	B	B	B	A	A	A	A	B	B	B	B
IWB8067	BS00036788_51	7B	49.0705	A	B	-	A	A	A	A	-	B	-	B	A	B	B	B	A	B	B	A	B	A	B	A	A	A	B	B	B	B	A	B	B	B	B	B	B	B	B	A	A	A	B	B	B	B	B
IWB11047	BS00079017_51	7B	49.4328	A	B	-	A	A	A	A	-	B	-	B	A	B	B	B	A	B	B	A	B	A	B	A	A	A	B	B	B	B	A	B	B	B	B	B	B	B	B	A	A	A	B	B	B	B	B
IWB34706	IAAV3391	7B	49.4328	A	B	-	A	A	A	A	-	B	-	B	A	B	B	B	A	B	B	A	B	A	B	A	A	A	B	B	B	B	A	B	B	B	B	B	B	B	B	A	A	A	B	B	B	B	B
IWB7118	BS00022498_51	7B	49.4328	A	B	-	A	A	A	A	-	B	-	B	A	B	B	B	A	B	B	A	B	A	B	A	A	A	B	B	B	B	A	B	B	B	B	B	B	B	B	A	A	A	B	B	B	B	B
IWB57670	RAC875_c4108_2179	7B	51.2854	A	B	-	A	A	A	A	-	B	-	B	A	B	B	B	A	B	B	A	B	A	B	A	A	A	B	B	B	B	A	B	B	B	B	B	B	B	B	A	A	A	B	B	B	B	B
IWB35777	IACX17	7B	52.3646	A	B	-	A	A	A	A	A	A	-	B	A	B	B	B	A	B	B	A	B	A	B	A	A	A	B	B	B	B	A	B	B	B	B	B	B	B	B	A	A	A	B	B	B	B	B
IWB173	BobWhite_c11119_83	7B	52.7143	A	B	-	B	A	A	A	A	A	-	B	A	B	B	B	A	B	B	A	B	A	B	A	A	A	B	B	B	B	A	B	B	B	B	B	B	B	B	A	A	A	B	B	B	B	B
IWB32502	GENE-1477_748	7B	54.5532	A	B	-	B	A	A	A	A	A	-	B	A	B	B	B	A	B	B	A	B	A	B	A	A	A	B	B	B	B	A	B	B	B	B	B	B	B	B	A	B	A	B	B	A	B	B
IWB56243	RAC875_c2889_273	7B	55.2779	A	B	-	B	A	A	A	A	A	-	B	A	B	B	B	A	B	B	B	B	A	B	A	A	A	B	B	B	-	A	B	B	B	B	B	B	B	B	A	B	A	B	B	A	B	B
IWB8964	BS00062967_51	7B	56.0187	A	B	-	B	A	A	A	A	A	-	B	A	B	A	B	A	B	B	B	B	A	B	A	A	A	B	B	B	-	B	B	B	B	B	B	B	B	B	A	B	A	B	B	A	B	B
IWB5043	BobWhite_rep_c53518_78	7B	56.0187	A	B	-	B	A	A	A	A	A	-	B	A	B	A	B	A	B	B	B	B	A	B	A	A	A	B	B	B	-	B	B	B	B	B	B	B	B	B	A	B	A	B	B	A	B	B
IWB70254	Tdurum_contig31496_79	7B	60.36	A	B	-	B	A	-	A	A	A	A	B	B	B	A	B	B	B	B	B	B	A	B	A	A	A	B	B	B	B	B	B	B	B	B	B	B	B	B	A	B	A	B	B	A	B	B
IWB7847	BS00031611_51	7B	63.3709	B	B	-	B	A	A	A	A	A	A	B	B	B	A	B	B	B	B	B	B	A	B	A	A	A	B	B	B	B	B	B	B	A	B	B	B	B	B	A	B	A	B	B	A	B	B
IWB7848	BS00031612_51	7B	63.3709	B	B	-	B	A	A	A	A	A	A	B	B	B	A	B	B	B	B	B	B	A	B	A	A	A	B	B	B	B	B	B	B	A	B	B	B	B	B	A	B	A	B	B	A	B	B
IWB71852	Tdurum_contig47854_182	7B	63.3709	B	B	-	B	A	A	A	A	A	A	B	B	B	A	B	B	B	B	B	B	A	-	A	A	A	B	B	B	B	B	B	B	A	B	B	B	B	B	A	B	A	B	B	A	B	B
IWB71851	Tdurum_contig47854_142	7B	63.3709	B	B	-	B	A	A	A	A	A	A	B	B	B	A	B	B	B	B	B	B	A	B	A	A	A	B	B	B	B	B	B	B	A	B	B	B	B	B	A	B	A	B	B	A	B	B
IWA1642	wsnp_Ex_c12535_19963035	7B	63.3709	B	B	A	B	A	A	A	A	A	A	B	B	B	A	B	B	B	B	B	B	A	B	A	A	A	B	B	B	B	B	B	B	A	B	B	B	B	B	A	B	A	B	B	A	B	B
IWB10628	BS00072941_51	7B	63.3709	B	B	A	B	A	A	A	A	A	A	B	B	B	A	B	B	B	B	B	B	A	B	A	A	A	B	B	B	B	B	B	B	A	B	B	B	B	B	A	B	A	B	B	A	B	B
IWB24548	Excalibur_c27158_671	7B	63.3709	B	B	A	B	A	A	A	A	A	-	B	B	B	A	B	B	B	B	B	B	A	B	A	A	A	B	B	B	B	B	B	B	A	B	B	B	B	B	A	B	A	B	B	A	B	B
IWB7824	BS00031141_51	7B	63.3709	B	B	A	B	A	A	A	A	A	A	B	B	B	A	B	B	B	B	B	B	A	B	A	A	A	B	B	B	B	B	B	B	A	B	B	B	B	B	A	B	A	B	B	A	B	B
IWB957	BobWhite_c16787_205	7B	63.3709	B	B	A	B	A	A	A	A	A	A	B	B	B	A	B	B	B	B	B	B	A	B	A	A	A	B	B	B	B	B	B	B	A	B	B	B	B	B	A	B	A	B	B	A	B	B
IWA375	wsnp_be591305B_Ta_1_1	7B	65.9657	B	B	-	B	A	A	A	A	A	A	B	B	B	A	B	B	A	B	B	B	A	B	A	A	A	B	A	B	B	B	A	B	A	B	B	B	B	B	A	B	A	B	B	A	B	B
IWB56254	RAC875_c28962_1393	7B	66.67	B	B	-	B	A	A	A	A	A	A	B	B	B	A	B	B	A	B	B	B	A	B	A	A	A	B	A	B	B	B	A	B	B	B	B	B	B	B	A	B	A	B	B	A	B	B
IWB40562	Kukri_c11274_506	7B	67.0124	B	B	-	B	A	A	A	A	A	A	-	B	B	A	B	-	A	B	B	B	A	-	A	A	A	B	A	B	-	B	A	B	B	B	B	B	B	-	A	B	A	-	B	A	B	B
IWB42040	Kukri_c18871_1338	7B	67.0124	B	B	-	B	A	A	A	A	A	A	B	B	B	A	B	B	A	B	B	B	A	B	A	A	A	B	A	B	B	B	A	B	B	B	B	B	B	B	A	B	A	B	B	A	B	B
IWB73494	Tdurum_contig81318_116	7B	68.9664	B	B	B	B	A	-	A	A	A	A	B	B	B	A	B	B	A	B	B	B	A	B	A	A	A	B	A	B	B	B	A	B	B	B	B	B	B	B	B	B	A	B	B	A	B	B
IWB69050	Tdurum_contig25380_205	7B	68.9664	B	B	B	B	A	-	A	A	A	A	B	B	B	A	B	B	A	B	B	B	A	B	A	A	A	B	A	B	B	B	A	B	B	B	B	B	B	B	B	B	A	B	B	A	B	B
IWB55964	RAC875_c26683_919	7B	68.9664	B	B	B	B	A	-	A	A	A	A	B	B	B	A	B	B	A	B	B	B	A	B	A	A	A	B	A	B	B	B	A	B	B	B	B	B	B	B	B	B	A	B	B	A	B	B
IWB74051	Tdurum_contig98740_79	7B	68.9664	B	B	B	B	A	-	A	A	A	A	B	B	B	A	B	B	A	B	B	B	A	B	A	A	A	B	A	B	B	B	A	B	B	B	B	B	B	B	B	B	A	B	B	A	B	B
IWB71925	Tdurum_contig48847_669	7B	69.3261	B	B	B	B	A	-	A	A	A	B	B	B	B	A	B	B	A	B	B	B	A	B	A	A	A	B	A	B	B	B	A	B	B	B	B	B	B	B	B	B	A	B	B	A	B	B
IWB73443	Tdurum_contig78772_317	7B	69.3261	B	B	B	B	A	-	A	A	A	B	B	B	B	A	B	B	A	B	B	B	A	B	A	A	A	B	A	B	B	B	A	B	B	B	B	B	B	B	B	B	A	B	B	A	B	B
IWB60357	RAC875_c7474_1661	7B	72.6153	B	B	B	B	A	B	B	B	A	B	B	B	B	A	A	B	A	B	B	B	B	B	A	A	A	B	A	B	B	B	A	B	B	B	B	B	B	B	A	B	B	B	B	A	B	B
IWB56242	RAC875_c2887_52	7B	72.6153	B	B	B	B	A	B	B	B	A	B	B	B	B	A	A	B	A	B	B	B	B	B	A	A	A	B	A	B	B	B	A	B	B	B	B	B	B	B	A	B	B	B	B	A	B	B
IWB73105	Tdurum_contig68339_71	7B	72.9626	B	B	B	B	A	B	B	B	A	B	B	B	B	A	A	B	A	B	B	B	B	B	A	A	A	B	A	B	B	B	A	B	B	B	B	B	B	B	A	B	B	B	B	A	B	B
IWB73104	Tdurum_contig68339_168	7B	72.9626	B	B	B	B	A	B	B	B	A	B	B	B	B	A	A	B	A	B	B	B	B	B	A	A	A	B	A	B	B	B	A	B	B	B	B	B	B	B	A	B	B	B	B	A	B	B
IWB68767	Tdurum_contig19022_1524	7B	72.9626	B	B	B	B	A	B	B	B	A	B	B	B	B	A	A	B	A	B	B	B	B	B	A	A	A	B	A	B	B	B	A	B	B	B	B	B	B	B	A	B	B	B	B	A	B	B
IWB40799	Kukri_c12317_336	7B	72.9626	B	B	B	B	A	B	B	B	A	B	B	B	B	A	A	B	A	B	B	B	B	B	A	A	A	B	A	B	B	B	A	B	B	B	B	B	B	B	A	B	B	B	B	A	B	B
IWB69212	Tdurum_contig25895_484	7B	72.9626	B	B	B	B	A	B	B	B	A	B	B	B	B	A	A	B	A	B	B	B	B	B	A	A	A	B	A	B	B	B	A	B	B	B	B	B	B	B	A	B	B	B	B	A	B	B
IWB60181	RAC875_c68398_75	7B	72.9626	B	B	B	B	A	B	B	B	A	B	B	B	B	A	A	B	A	B	B	B	B	B	A	A	A	B	A	B	B	B	A	B	B	B	B	B	B	B	A	B	B	B	B	A	B	B
IWA449	wsnp_BF293181B_Ta_2_1	7B	74.3517	B	B	B	B	A	B	B	B	B	B	B	B	B	A	B	B	A	B	B	B	B	B	A	A	A	B	A	B	B	B	A	B	B	B	B	B	B	B	A	B	B	B	B	A	B	B
IWB26230	Excalibur_c41452_997	7B	75.8227	B	B	B	B	A	B	B	B	B	B	B	B	B	A	B	B	A	B	B	B	B	B	B	B	A	B	A	B	B	B	A	B	B	B	B	B	B	B	A	B	B	B	B	A	B	B
IWA3655	wsnp_Ex_c38711_46173464	7B	75.8227	B	B	B	B	A	B	B	B	B	B	B	B	B	A	B	B	A	B	B	B	B	B	B	B	A	B	A	B	B	B	A	B	B	B	B	B	B	B	A	B	B	B	B	A	B	B
IWB19721	Ex_c12057_797	7B	75.8227	B	B	B	B	A	B	B	B	B	B	B	B	B	A	B	B	A	B	B	B	B	B	B	B	A	B	A	B	B	B	A	B	B	B	B	B	B	B	A	B	B	B	B	A	B	B
IWB48538	Kukri_c99107_143	7B	75.8227	B	B	B	B	A	B	B	B	B	B	B	B	B	A	B	B	A	B	B	B	B	B	B	B	A	B	A	B	B	B	A	B	B	B	B	B	B	B	A	B	B	B	B	A	B	B
IWB2567	BobWhite_c3269_141	7B	75.8227	B	B	B	B	A	B	B	B	B	B	B	B	B	A	B	B	A	B	B	B	B	B	B	B	A	B	A	B	B	B	A	B	B	B	B	B	B	B	A	B	B	B	B	A	B	B
IWB2568	BobWhite_c3269_191	7B	75.8227	B	B	B	B	A	B	B	B	B	B	B	B	B	A	B	B	A	-	B	B	B	B	B	B	A	B	A	B	B	B	A	B	B	B	B	B	B	B	A	B	B	B	B	A	B	B
IWB12371	BS00108573_51	7B	75.8227	B	B	B	B	A	B	B	B	B	B	B	B	B	A	B	B	A	B	B	B	B	B	B	B	A	B	A	B	B	B	A	B	B	B	B	B	B	B	A	B	B	B	B	A	B	B
IWA1361	wsnp_Ex_c106_217340	7B	76.1675	B	B	B	B	A	B	B	B	B	B	B	B	B	A	B	B	A	B	B	B	B	B	B	-	A	B	A	B	B	B	A	B	B	B	B	B	B	B	A	B	B	B	B	A	B	B
IWB44319	Kukri_c34355_722	7B	76.1675	B	B	B	B	A	B	B	B	B	B	B	B	B	A	B	B	A	B	B	B	B	B	B	-	A	B	A	B	B	B	A	B	B	B	B	B	B	B	A	B	B	B	B	A	B	B
IWB40901	Kukri_c12822_132	7B	76.1675	B	B	B	B	A	B	B	B	B	B	B	B	B	A	B	B	A	B	B	B	B	B	B	-	A	B	A	B	B	B	A	B	B	B	B	B	B	B	A	B	B	B	B	A	B	B
IWB74713	tplb0041g04_660	7B	76.1675	B	B	B	B	A	B	B	B	B	B	B	B	B	A	B	B	A	B	B	B	B	B	B	-	A	B	A	B	B	B	A	B	B	B	B	B	B	B	A	B	B	B	B	A	B	B
IWA636	wsnp_BQ171683B_Ta_2_1	7B	76.1675	B	B	B	B	A	B	B	B	B	B	B	B	B	A	B	B	A	B	B	B	B	B	B	B	A	B	A	B	B	B	A	B	B	B	B	B	B	B	A	B	B	B	B	A	B	B
IWB72504	Tdurum_contig56342_134	7B	76.1675	B	B	B	B	A	B	B	B	B	B	B	B	B	A	B	B	A	B	B	B	B	B	B	B	A	B	A	B	B	B	A	B	B	B	B	B	B	B	A	B	B	B	B	A	B	B
IWB72505	Tdurum_contig56342_259	7B	76.1675	B	B	B	B	A	-	B	B	B	B	B	B	B	A	B	B	A	B	B	B	B	B	B	B	A	B	A	B	B	B	A	B	B	B	B	B	B	B	A	B	B	B	B	A	B	B
IWB29286	Excalibur_c8994_1297	7B	76.1675	B	B	B	B	A	B	B	B	B	B	B	B	B	A	B	B	A	B	B	B	B	B	B	B	A	B	A	B	B	B	A	B	B	B	B	B	B	B	A	B	B	B	B	A	B	B
IWB38733	Ku_c20136_198	7B	76.5123	B	B	B	B	A	B	B	B	B	B	B	B	B	A	B	B	A	B	B	B	B	B	B	B	A	B	A	B	B	B	A	B	B	B	B	B	B	B	A	B	B	B	B	A	B	B
IWB40249	Kukri_c10108_115	7B	79.0691	B	B	B	B	A	B	B	B	B	B	B	B	B	A	B	B	A	B	B	B	B	A	B	B	A	B	A	B	B	B	A	B	B	B	B	B	B	B	A	B	B	B	B	A	B	B
IWB59199	RAC875_c5646_969	7B	84.1247	B	B	B	B	A	B	B	B	B	-	B	B	B	A	B	B	A	B	B	B	B	A	B	B	A	B	A	B	B	B	B	B	B	B	B	B	B	B	A	B	B	B	B	A	B	B
IWB10797	BS00075332_51	7B	85.924	B	B	B	B	A	B	B	B	B	B	B	B	B	A	B	B	A	B	B	B	B	A	B	B	A	B	A	B	B	B	B	B	B	B	B	B	B	B	A	B	B	B	B	B	B	B
IWB73136	Tdurum_contig69011_566	7B	85.924	B	B	B	B	A	B	B	B	B	B	B	B	B	A	B	B	A	B	B	B	B	A	B	B	A	B	A	B	B	B	B	B	B	B	B	B	B	B	A	B	B	B	B	B	B	B
IWB72469	Tdurum_contig55724_208	7B	85.924	B	B	B	B	A	B	B	B	B	B	B	B	B	A	B	B	A	B	B	B	B	A	B	B	A	B	A	B	B	B	B	B	B	B	B	B	B	B	A	B	B	B	B	B	B	B
IWB70715	Tdurum_contig41998_1213	7B	85.924	B	B	B	B	A	B	B	B	B	B	B	B	B	A	B	B	A	B	B	B	B	A	B	B	A	B	A	B	B	B	B	B	B	B	B	B	B	B	A	B	B	B	B	B	B	B
IWB72997	Tdurum_contig64611_278	7B	85.924	B	B	B	B	A	B	B	B	B	B	B	B	B	A	B	B	A	B	B	B	B	A	B	B	A	B	A	B	B	B	B	B	B	B	B	B	B	B	A	B	B	B	B	B	B	B
IWB35137	IAAV6058	7B	96.5862	B	B	B	B	B	B	B	B	B	B	B	B	B	B	B	B	B	B	B	B	B	B	B	B	B	B	B	B	B	B	B	B	B	B	B	B	B	B	B	B	B	B	B	B	B	B
IWA7185	wsnp_Ku_c5693_10079343	7B	96.5862	B	B	B	B	B	B	B	B	B	-	B	B	B	B	B	B	B	B	B	B	B	B	B	B	B	B	B	B	B	B	B	B	B	B	B	B	B	B	B	B	B	B	B	B	B	B
IWB38052	Ku_c10179_1837	7B	104.245	B	B	B	B	A	B	B	B	B	B	B	B	B	A	B	B	A	B	B	B	B	A	B	B	A	B	A	B	B	B	B	B	B	B	B	B	B	B	B	B	B	B	B	B	B	B
IWB34042	GENE-4608_280	7B	104.245	B	B	B	B	A	B	B	B	B	B	B	-	B	A	B	B	A	B	B	B	B	A	B	B	A	B	A	B	B	B	B	B	B	B	B	B	B	B	B	B	B	B	B	B	B	B
IWB5825	BS00003350_51	7B	104.245	B	B	B	B	A	B	B	B	B	B	B	B	B	A	B	B	A	B	B	B	B	A	B	B	A	B	A	B	B	B	B	B	B	B	B	B	B	B	B	B	B	B	B	B	B	B
IWB9018	BS00063208_51	7B	106.057	-	B	B	B	A	B	B	B	B	B	B	B	B	A	B	B	A	B	B	B	B	A	B	B	A	B	A	B	B	B	A	B	B	B	B	B	B	B	B	B	B	B	B	B	B	B
IWB34276	GENE-4958_195	7B	106.412	A	B	B	B	A	B	B	B	B	B	B	B	B	A	B	B	A	B	B	B	B	A	B	B	A	B	A	B	B	B	A	B	-	B	B	B	B	B	B	B	B	B	B	B	B	B
IWB9820	BS00066484_51	7B	106.412	A	B	B	B	A	B	B	B	B	B	B	B	B	A	B	B	A	B	B	B	B	A	B	B	A	B	A	B	B	B	A	B	-	B	B	B	B	B	B	B	B	B	B	B	B	B
IWB7710	BS00029286_51	7B	107.126	A	B	B	B	A	B	B	B	B	B	B	B	B	A	B	B	A	A	B	B	B	A	B	B	A	B	A	B	B	B	A	B	-	B	B	B	B	B	B	B	B	B	B	B	B	B
IWB7711	BS00029287_51	7B	107.126	A	B	B	B	A	B	B	B	B	B	B	B	B	A	B	B	A	A	B	B	B	A	B	B	A	B	A	B	B	B	A	B	-	B	B	B	B	B	B	B	B	B	B	B	B	B
IWB56854	RAC875_c3361_180	7B	110.489	A	B	B	B	A	-	A	A	B	B	B	B	B	A	B	B	A	A	B	B	B	A	B	B	A	B	B	B	B	B	A	B	A	B	B	B	B	B	B	B	B	B	B	B	B	B
IWA1339	wsnp_Ex_c10500_17163855	7B	110.836	A	B	B	B	A	-	A	A	B	B	B	B	B	A	B	B	A	A	B	B	B	A	B	B	A	B	B	B	B	B	A	B	A	B	B	B	B	B	B	B	B	B	B	B	B	B
IWA3423	wsnp_Ex_c3309_6096114	7B	110.836	A	B	B	B	A	-	A	A	B	B	B	B	B	A	B	B	A	A	B	B	B	A	B	B	A	B	B	B	B	B	A	B	A	B	B	B	B	B	B	B	B	B	B	B	B	B
IWB25295	Excalibur_c3309_1180	7B	110.836	A	B	B	B	A	-	A	A	B	B	B	B	B	A	B	B	A	A	B	B	B	A	B	B	A	B	B	B	B	B	A	B	A	B	B	B	B	B	B	B	B	B	B	B	B	B
IWB72124	Tdurum_contig5083_1164	7B	110.836	A	B	B	B	A	-	A	A	B	B	B	B	B	A	B	B	A	A	B	B	B	A	B	B	A	B	B	B	B	B	A	B	A	B	B	B	B	B	B	B	B	B	B	B	B	B
IWA7330	wsnp_Ku_c854_1768346	7B	110.836	A	B	B	B	A	-	A	A	B	B	B	B	B	A	B	B	A	A	B	B	B	A	B	B	A	B	B	B	B	B	A	B	A	B	B	B	B	B	B	B	B	B	B	B	B	B
IWA7329	wsnp_Ku_c854_1768062	7B	110.836	A	B	B	B	A	-	A	A	B	B	B	B	B	A	B	B	A	A	B	B	B	A	B	B	A	B	B	B	B	B	A	B	A	B	B	B	B	B	B	B	B	B	B	B	B	B
IWB4539	BobWhite_c8890_279	7B	113.356	A	B	B	B	A	-	A	A	B	B	B	B	B	A	B	B	A	A	B	B	B	A	B	-	A	B	B	B	B	B	A	B	B	B	B	B	B	B	B	B	B	B	B	B	B	B
IWA2767	wsnp_Ex_c22955_32173776	7B	113.356	A	B	B	B	A	-	A	A	B	B	B	B	B	A	B	B	A	A	B	B	B	A	B	-	A	B	B	B	B	B	A	B	B	B	B	B	B	B	B	B	B	B	B	B	B	B
IWB7642	BS00027054_51	7B	115.548	A	B	B	B	A	-	A	A	B	B	B	B	B	A	B	B	A	A	B	B	B	A	B	-	A	B	B	B	B	B	A	B	B	B	B	A	B	A	B	B	B	B	B	B	B	B
IWA394	wsnp_BE605194B_Ta_2_1	7B	115.897	A	B	B	B	A	-	A	A	B	B	B	B	A	A	B	B	A	A	B	B	B	A	B	-	A	B	B	B	B	B	A	B	B	B	B	A	B	A	B	B	B	B	B	B	B	B
IWA320	wsnp_BE498985A_Ta_2_1	7B	115.897	A	B	B	B	A	-	A	A	B	B	B	B	A	A	B	B	A	A	B	B	B	A	B	-	A	B	B	B	B	B	A	B	B	B	B	A	B	A	B	B	B	B	B	B	B	B
IWB71473	Tdurum_contig43995_370	7B	115.897	A	B	B	B	A	-	A	A	B	B	B	B	A	A	B	B	A	A	B	B	B	A	B	-	A	B	B	B	B	B	A	B	B	B	B	A	B	A	B	B	B	B	B	B	B	B
IWB71422	Tdurum_contig43435_417	7B	119.663	A	B	B	B	A	B	B	B	B	B	A	B	A	A	B	B	A	A	B	B	B	A	B	-	A	B	B	B	B	B	A	B	B	B	B	A	B	A	B	B	B	B	B	B	B	B
IWB71789	Tdurum_contig47317_100	7B	120.358	A	B	B	B	A	B	B	B	B	B	A	B	A	A	B	B	A	A	B	B	B	A	B	-	B	B	B	B	B	B	A	B	B	B	B	A	B	A	B	B	B	B	B	B	B	B
IWB35490	IAAV8521	7B	123.346	A	B	B	B	A	B	B	B	B	B	A	B	A	A	B	B	A	A	B	B	B	A	B	-	A	B	B	B	B	B	A	B	B	B	B	A	B	A	B	B	A	B	B	B	B	B
IWB68458	Tdurum_contig15734_221	7B	127.555	A	B	B	B	A	B	B	B	B	B	A	B	A	B	B	B	A	A	B	B	B	B	B	B	A	A	A	B	B	B	A	B	B	B	A	A	B	A	B	B	A	B	B	B	B	B
IWB72939	Tdurum_contig63207_82	7B	128.953	A	B	B	B	A	B	B	B	B	B	A	B	A	B	B	B	A	A	B	B	B	B	B	B	A	A	A	B	B	B	A	B	B	B	B	B	B	A	B	B	A	B	B	B	B	B
IWA2369	wsnp_Ex_c19_39269	7B	133.067	B	B	B	B	A	B	B	B	A	B	A	B	A	B	B	B	A	A	B	B	B	B	-	B	A	A	A	B	B	B	A	B	A	B	A	B	B	A	B	B	A	B	B	B	B	B
[truncated: 40 more rows]
[truncated: 103 more columns]

## Sheet: Supplementary Table 2
Supplementary Table 2. Phenotypic reactions of 149 recombinant inbred lines derived from the durum cultivars Kronos and Gredho and checks in response to infiltration with the nectrophic effector Ptr ToxB. Reactions were rated on a 0-3 scale where 0 = insensitive and 3 = highly sensitive as described by Friesen and Faris (2012).
Line-ID	Rep-1	Rep-2	Rep-3	Rep-4	Avg	Sensitive (S) or Insensitive (I)
Kronos	2.3	2.5	2.5	2.5	2.4	S
Gredho	0	0	0	0	0	I
Altar84	2	2	2.8	2.3	2.3	S
Langdon	0.5	0.5	0	0.5	0.4	I
KG-RIL-1	2.5	2.8	2.5	2.5	2.6	S
KG-RIL-2	0	0	0	0	0	I
KG-RIL-4	1.5	3	1.5	2	2	S
KG-RIL-5	2.5	2	2	2.5	2.3	S
KG-RIL-6	2	2	2.5	2.5	2.3	S
KG-RIL-7	2.3	2.3	2	2.5	2.3	S
KG-RIL-8	2	2	2	2	2	S
KG-RIL-9	1.5	1.5	2	2	1.8	S
KG-RIL-10	2	2	2	2	2	S
KG-RIL-11	2	3	1.5	1.5	2	S
KG-RIL-12	0.5	0	0	0	0.1	I
KG-RIL-13	0	0.5	0	0	0.1	I
KG-RIL-14	1.5	1.5	1.5	2.5	1.8	S
KG-RIL-15	1.3	2.5	1	2	1.7	S
KG-RIL-16	0	0	0	0	0	I
KG-RIL-17	1.8	2	2	2	1.9	S
KG-RIL-18	0	0	0	0	0	I
KG-RIL-19	1.3	1.8	2	1.5	1.6	S
KG-RIL-20	0	0	0	0	0	I
KG-RIL-21	1.5	2.5	1.5	1.5	1.8	S
KG-RIL-22	0	0	0	0	0	I
KG-RIL-24	0	0	0	0	0	I
KG-RIL-25	2	2.5	1.5	2	2	S
KG-RIL-26	2	2.5	2	2	2.1	S
KG-RIL-27	1.8	2	1.5	2	1.8	S
KG-RIL-28	0	0.3	0	0	0.1	I
KG-RIL-29	2	2.5	1.5	2	2	S
KG-RIL-30	1.5	2.5	2	2	2	S
KG-RIL-31	0.5	0	0.5	0	0.3	I
KG-RIL-32	0	0	0	0	0	I
KG-RIL-33	2	2	2.5	3	2.4	S
KG-RIL-34	0.5	0	0	0	0.1	I
KG-RIL-35	2	1.8	2.5	3	2.3	S
KG-RIL-36	1.5	1.5	1.8	2.5	1.8	S
KG-RIL-37	2	2	1.8	3	2.2	S
KG-RIL-38	2	2	2.3	2	2.1	S
KG-RIL-39	1.8	3	2	1.5	2.1	S
KG-RIL-40	0.3	0	0	0	0.1	I
KG-RIL-41	0.3	0	0	0	0.1	I
KG-RIL-42	1.8	1.8	1.3	1.5	1.6	S
KG-RIL-43	2.3	1.8	1.3	1.5	1.7	S
KG-RIL-44	2.5	2.8	1.5	2.5	2.3	S
KG-RIL-45	0	0	0	0	0	I
KG-RIL-46	0	0	0	0	0	I
KG-RIL-47	1.5	2	2	2	1.9	S
KG-RIL-48	1.8	3	2	2	2.2	S
KG-RIL-49	0.5	0.5	0	0.3	0.3	I
KG-RIL-50	0.3	0	0	0.3	0.1	I
KG-RIL-51	0	0	0	0.3	0.1	I
KG-RIL-52	0.3	0	0	0	0.1	I
KG-RIL-53	0	0	0	0	0	I
KG-RIL-54	0	0	0	0	0	I
KG-RIL-56	0	0	0	0	0	I
KG-RIL-57	2	2	2	2	2	S
KG-RIL-58	1.5	1.5	1.3	2	1.6	S
KG-RIL-59	2	2	1.5	1.5	1.8	S
KG-RIL-60	0.5	0.5	0.5	0	0.4	I
KG-RIL-61	1.3	1	1	2.3	1.4	S
KG-RIL-62	0	0	0	0	0	I
KG-RIL-64	1.5	2	2	3	2.1	S
KG-RIL-65	1.5	2.3	1.5	2.3	1.9	S
KG-RIL-66	2	2	2	2	2	S
KG-RIL-67	0	0	0	0	0	I
KG-RIL-68	0	0	0	0	0	I
KG-RIL-69	1.5	2	1.5	1.5	1.6	S
KG-RIL-70	0	0	0	0	0	I
KG-RIL-71	2	2.3	2	2	2.1	S
KG-RIL-72	0	0	0	0.5	0.1	I
KG-RIL-73	2	2	1.5	2	1.9	S
KG-RIL-74	1.8	1.8	1.8	2	1.8	S
KG-RIL-75	0.3	0.3	0	0	0.1	I
KG-RIL-76	0.5	0	0	0	0.1	I
KG-RIL-77	2.3	2.5	2	2	2.2	S
KG-RIL-78	1.8	2.3	1.3	2	1.8	S
KG-RIL-79	2.8	3	1	3	2.4	S
KG-RIL-80	0	0	0	0	0	I
KG-RIL-81	3	3	2	2	2.5	S
KG-RIL-82	0.5	0.5	0.5	0.3	0.4	I
KG-RIL-83	-	-	-	-	-	-
KG-RIL-84	1.5	3	2	2	2.1	S
KG-RIL-85	0	0.5	0	0	0.1	I
KG-RIL-86	2	3	2.5	3	2.6	S
KG-RIL-87	2	2	1.5	1.5	1.8	S
KG-RIL-88	0	0	0	0	0	I
KG-RIL-89	0	0	0	0	0	I
KG-RIL-90	0	0	0	0	0	I
KG-RIL-91	2.5	2	2	2.5	2.3	S
KG-RIL-92	2	2	1.8	2	1.9	S
KG-RIL-93	1.5	1.8	1.5	2	1.7	S
KG-RIL-94	1.5	2	1.8	2	1.8	S
KG-RIL-95	0	0	0	0	0	I
KG-RIL-96	0	0	0.3	0	0.1	I
KG-RIL-97	0	0	0	0	0	I
KG-RIL-98	2.5	3	2	2	2.4	S
KG-RIL-99	1.8	2	1.8	2	1.9	S
KG-RIL-100	1.5	2.5	1.5	2.5	2	S
KG-RIL-101	0	0	0	0	0	I
KG-RIL-102	2.8	2.5	2	3	2.6	S
KG-RIL-103	0	0.3	0	0	0.1	I
KG-RIL-104	0.3	0	0	0	0.1	I
KG-RIL-105	0.5	0	0	0	0.1	I
KG-RIL-106	3	2	1.3	2	2.1	S
KG-RIL-107	2	2	2	2	2	S
KG-RIL-108	0	0	0	0	0	I
KG-RIL-109	0	0	0.5	0	0.1	I
KG-RIL-110	2.3	2	3	2	2.3	S
KG-RIL-111	0	0	0	0	0	I
KG-RIL-113	0	0	0	0	0	I
KG-RIL-114	0.3	0	0	0	0.1	I
KG-RIL-115	0	0	0	0	0	I
KG-RIL-116	0	0	0.3	0	0.1	I
KG-RIL-117	0	0.3	0	0	0.1	I
KG-RIL-118	1.5	1.8	2	2	1.8	S
KG-RIL-119	0	0	0	0	0	I
KG-RIL-120	0.3	0	0	0	0.1	I
KG-RIL-121	0.5	0	0.3	0	0.2	I
KG-RIL-122	0.3	0	0.5	0	0.2	I
KG-RIL-123	0	0	0.5	0	0.1	I
KG-RIL-124	2	1.5	1.5	1.5	1.6	S
KG-RIL-125	3	1.3	1.5	1.3	1.8	S
KG-RIL-126	1.8	1.5	2	1.5	1.7	S
KG-RIL-127	0	0	0	0	0	I
KG-RIL-128	2	2.8	1.5	1.5	1.9	S
KG-RIL-129	2.3	3	1.5	1	1.9	S
KG-RIL-130	0.3	0	0	0	0.1	I
KG-RIL-132	2.3	1	1.5	1	1.4	S
KG-RIL-133	2.5	2	1.8	2	2.1	S
KG-RIL-134	0.3	0.3	0	0.3	0.2	I
KG-RIL-135	0	0	0	0.3	0.1	I
KG-RIL-136	1.5	2.3	2	2	1.9	S
KG-RIL-137	0	0	0	0	0	I
KG-RIL-139	0.5	0	0	0	0.1	I
KG-RIL-140	2.3	2.8	2	3	2.5	S
KG-RIL-141	0.5	0	0	0	0.1	I
KG-RIL-142	1.8	2.8	2	1.5	2	S
KG-RIL-143	2.3	3	2	2.5	2.4	S
KG-RIL-144	0	0	0	0	0	I
KG-RIL-145	2	2.5	2	2	2.1	S
KG-RIL-146	0.5	0	0	0.5	0.3	I
KG-RIL-147	1.8	2	2.5	3	2.3	S
KG-RIL-148	-	-	-	-	-	-
KG-RIL-152	0	0	0	0	0	I
KG-RIL-153	0	0	0.5	0	0.1	I
KG-RIL-154	2	2.5	2.3	3	2.4	S
KG-RIL-155	-	-	-	-	-	-
KG-RIL-156	-	-	-	-	-	-
KG-RIL-157	-	-	-	-	-	-
KG-RIL-158	-	-	-	-	-	-
KG-RIL-159	-	-	-	-	-	-

## Sheet: Supplementary Table 3
Supplementary Table 3. PCR primers developed and used for saturation mapping of the Tsc2 gene in the Kronos × Gredho recombinant inbred population.
fcp ID	Type	IDa	Sequence (5' -> 3')b	Pos (bp)c
fcp1022	SSR	Forward	AGGATACGATACCTACATGGGG	26,213,374 – 26,213,533
		Reverse	ACCTAAGTTGCCATAAGCATGA
fcp1023	KASP	FAM	GAAGGTGACCAAGTTCATGCTCCTCATCCTCACCCATCGTA	27804146
		HEX	GAAGGTCGGAGTCAACGGATTCCTCATCCTCACCCATCGTG
		Com	CGTTGTTTGGCACTCCGTTT
fcp1024	SSR	Forward	ACCTTGAATCCCTTCCAAGAAT	28,785,542 – 28,785,691
		Reverse	CTGCCTGCTAGGTGTTCGAC
fcp1025	SSR	Forward	AAAAGTTCCATGAGCAGAGGAG	29,797,963 – 29,798,172
		Reverse	GCTTAAATGAAAAGGATCGGTG
fcp1026	KASP	FAM	GAAGGTGACCAAGTTCATGCTATATGCAGGCCCTGTGCA	29798557
		HEX	GAAGGTCGGAGTCAACGGATTATATGCAGGCCCTGTGCG
		Com	ATGTGATAGCCCTAGCCCCG
fcp1027	KASP	FAM	GAAGGTGACCAAGTTCATGCTTTGATTGCGGAGTATGTGCA	30202645
		HEX	GAAGGTCGGAGTCAACGGATTTTGATTGCGGAGTATGTGCG
		Com	GCAATGCGTGTCCGTGTAAA
fcp1028	KASP	FAM	GAAGGTGACCAAGTTCATGCTCCGTTCAGATACAATGGAACTCTAC	30240848
		HEX	GAAGGTCGGAGTCAACGGATTCCGTTCAGATACAATGGAACTCTAT
		Com	GGCGTAGACATGAGCAGAAA
fcp1029	SSR	Forward	TCCTAGTCCCTCCCTAGAGGTT	30,269,311 – 30,269,476
		Reverse	CTGGTTTGTTGTATCCCAGCTT
fcp1030	SSR	Forward	CCCGCCTCTTATTCCACTTAAT	30,272,913 – 30,273,136
		Reverse	TATCAAGGATGGGATGTGGTTT
fcp1031	SSR	Forward	GCGCTGCATTTAGCATACCT	30,311,119 – 30,311,475
		Reverse	CACACTTAATATGGGACTGAGGG
fcp1032	KASP	FAM	GAAGGTGACCAAGTTCATGCTAGCAGTAGCCACTATCCAGAAT	30312693
		HEX	GAAGGTCGGAGTCAACGGATTAGCAGTAGCCACTATCCAGAAC
		Com	CAAGCCACACAGCACACAC
fcp1033	KASP	FAM	GAAGGTGACCAAGTTCATGCTTGAAATCACAGGATATGGTTCTCTT	30349230
		HEX	GAAGGTCGGAGTCAACGGATTTGAAATCACAGGATATGGTTCTCTC
		Com	CATAGCTGTAACCTGTGCGG
fcp1034	KASP	FAM	GAAGGTGACCAAGTTCATGCTCTTTCACCCCATCCACCGA	30373477
		HEX	GAAGGTCGGAGTCAACGGATTCTTTCACCCCATCCACCGG
		Com	CCATCAGGAAAGCATGCACC
fcp1035	KASP	FAM	GAAGGTGACCAAGTTCATGCTTCATTCCCAAGAACATGTTACTCTC	30374052
		HEX	GAAGGTCGGAGTCAACGGATTTCATTCCCAAGAACATGTTACTCTA
		Com	AGTCAGAGTAGAGAGGGGTGA
fcp1036	KASP	FAM	GAAGGTGACCAAGTTCATGCTATAGTTGGCCCAAACTCGCC	30375102
		HEX	GAAGGTCGGAGTCAACGGATTATAGTTGGCCCAAACTCGCT
		Com	TGATGGTTGTCATAGCTGGGA
fcp1037	KASP	FAM	GAAGGTGACCAAGTTCATGCTGCCTATTGCATGCAACTTAGTTAA	30375462
		HEX	GAAGGTCGGAGTCAACGGATTGCCTATTGCATGCAACTTAGTTAG
		Com	TGTCAAAGTTTCACACATTAACGT
fcp1038	KASP	FAM	GAAGGTGACCAAGTTCATGCTTTGAAATCACACAAATTCGAACAAA	30376252
		HEX	GAAGGTCGGAGTCAACGGATTTTGAAATCACACAAATTCGAACAAG
		Com	GGGACAAGGCACGTGATTCT
fcp1039	KASP	FAM	GAAGGTGACCAAGTTCATGCTGGTGAGAAGCTAAATGGTGATCTT	30377147
		HEX	GAAGGTCGGAGTCAACGGATTGGTGAGAAGCTAAATGGTGATCTC
		Com	GGCAGTTGCACTTCCATGAG
fcp1040	KASP	FAM	GAAGGTGACCAAGTTCATGCTGCTTTCCCCACCCTCCATC	30377251
		HEX	GAAGGTCGGAGTCAACGGATTGCTTTCCCCACCCTCCATT
		Com	ACAAGCATGAGATATGTCGCT
fcp1041	KASP	FAM	GAAGGTGACCAAGTTCATGCTTCTTTTATGTTGCAGGTATTCTCTT	30377419
		HEX	GAAGGTCGGAGTCAACGGATTTCTTTTATGTTGCAGGTATTCTCTC
		Com	GCGACATATCTCATGCTTGTGT
fcp1042	KASP	FAM	GAAGGTGACCAAGTTCATGCTGGAAGGAAACGTTTGCCAGT	30387075
		HEX	GAAGGTCGGAGTCAACGGATTGGAAGGAAACGTTTGCCAGC
		Com	TGGCAAAGTGAAGCAGTGGA
fcp1043	KASP	FAM	GAAGGTGACCAAGTTCATGCTCATCCACCACCACCATAAGTTAT	30608661
		HEX	GAAGGTCGGAGTCAACGGATTCATCCACCACCACCATAAGTTAC
		Com	CACTAGGATGCGTTGTTTGCC
fcp1044	KASP	FAM	GAAGGTGACCAAGTTCATGCTGCGATGTGCCGTCTGTTC	30784354
		HEX	GAAGGTCGGAGTCAACGGATTGCGATGTGCCGTCTGTTT
		Com	ATGAACGGCCTGTCACCATC
fcp1045	KASP	FAM	GAAGGTGACCAAGTTCATGCTAGAAAGCTGACACTGCATCG	30939846
		HEX	GAAGGTCGGAGTCAACGGATTAGAAAGCTGACACTGCATCT
		Com	AACTTCGGGGCCCTTTGTAC
fcp1046	KASP	FAM	GAAGGTGACCAAGTTCATGCTTCACGACAAACATCAAAAAGTATGG	30969972
		HEX	GAAGGTCGGAGTCAACGGATTTCACGACAAACATCAAAAAGTATGT
		Com	TGAAACGGTTGCCCTTCTCA
fcp1047	KASP	FAM	GAAGGTGACCAAGTTCATGCTGGTGAGAAAATGGTTAGAGAGGTAT	30981334
		HEX	GAAGGTCGGAGTCAACGGATTGGTGAGAAAATGGTTAGAGAGGTAG
		Com	TATATGGATGCAGCTCCGGC
fcp1048	KASP	FAM	GAAGGTGACCAAGTTCATGCTACGTTGCTCCATGTACAAGT	30981486
		HEX	GAAGGTCGGAGTCAACGGATTACGTTGCTCCATGTACAAGC
		Com	GCATTGCAGCACAAGGAGTT
fcp1049	KASP	FAM	GAAGGTGACCAAGTTCATGCTTCCAGCTGTTGTCACTATGAATT	30982177
		HEX	GAAGGTCGGAGTCAACGGATTTCCAGCTGTTGTCACTATGAATC
		Com	GGAAAACCGATGCGCCTAGA
fcp1050	KASP	FAM	GAAGGTGACCAAGTTCATGCTTTCTTATGTCGACAAACTTGGGAA	30990316
		HEX	GAAGGTCGGAGTCAACGGATTTTCTTATGTCGACAAACTTGGGAG
		Com	CACCCCATGGACCTTCAGAG
fcp1051	KASP	FAM	GAAGGTGACCAAGTTCATGCTCGTTTTCCCATGACTGATTTGGAA	31004103
		HEX	GAAGGTCGGAGTCAACGGATTCGTTTTCCCATGACTGATTTGGAG
		Com	CCATGAACATGCATGCACGT
fcp1052	KASP	FAM	GAAGGTGACCAAGTTCATGCTCCTGTATCGCCAGCCACAC	31022887
		HEX	GAAGGTCGGAGTCAACGGATTCCTGTATCGCCAGCCACAG
		Com	GTTTTGTGCGGGGCGTATTT
fcp1053	KASP	FAM	GAAGGTGACCAAGTTCATGCTGGACAAGAAAGAAGCTCACCA	31049783
		HEX	GAAGGTCGGAGTCAACGGATTGGACAAGAAAGAAGCTCACCG
		Com	CTTGCTTGCTTGTGTGCTCG
fcp1054	KASP	FAM	GAAGGTGACCAAGTTCATGCTAGTCTCACTAAACCATCTCAATGT	31059257
		HEX	GAAGGTCGGAGTCAACGGATTAGTCTCACTAAACCATCTCAATGA
		Com	TCATCAGCAAGGGCAACAGT
fcp1055	KASP	FAM	GAAGGTGACCAAGTTCATGCTTGTACTGCCAACTTGAACTTGT	31059772
		HEX	GAAGGTCGGAGTCAACGGATTTGTACTGCCAACTTGAACTTGA
		Com	GCACACTCAAGAGCAGAGGA
fcp1056	KASP	FAM	GAAGGTGACCAAGTTCATGCTGTACCACGTCTCTCCATCTCT	31060267
		HEX	GAAGGTCGGAGTCAACGGATTGTACCACGTCTCTCCATCTCC
		Com	GTCAGTCAGTCACCACCGG
fcp1057	KASP	FAM	GAAGGTGACCAAGTTCATGCTCGAGGATGGAACGGACGG	31060476
		HEX	GAAGGTCGGAGTCAACGGATTCGAGGATGGAACGGACGT
		Com	ACACTCGTACCAATCAGCGT
fcp1058	KASP	FAM	GAAGGTGACCAAGTTCATGCTAACAATGTGCTTAACGATAACTGT	31071872
		HEX	GAAGGTCGGAGTCAACGGATTAACAATGTGCTTAACGATAACTGC
		Com	ATTGTAGTCGTTGCCTCCCC
fcp1059	KASP	FAM	GAAGGTGACCAAGTTCATGCTCCCAGCTGGCTACACTCA	31099261
		HEX	GAAGGTCGGAGTCAACGGATTCCCAGCTGGCTACACTCG
		Com	TCATCCCTCTACTCCTCGGC
fcp1060	KASP	FAM	GAAGGTGACCAAGTTCATGCTCTTGAGCAGGCCAGCGAC	31100791
		HEX	GAAGGTCGGAGTCAACGGATTCTTGAGCAGGCCAGCGAT
		Com	CCCTTACACCGTGCAGTCC
fcp1061	KASP	FAM	GAAGGTGACCAAGTTCATGCTTGATGTCAGGCTGCACAAAAAC	31100944
		HEX	GAAGGTCGGAGTCAACGGATTTGATGTCAGGCTGCACAAAAAG
		Com	ACCTGTTTGCTGAGCCTGAG
fcp1062	KASP	FAM	GAAGGTGACCAAGTTCATGCTTGGTGTGGGTGTGGCAATTT	31168457
		HEX	GAAGGTCGGAGTCAACGGATTTGGTGTGGGTGTGGCAATTG
		Com	GCAAAGGTAGCAAAGACGCA
fcp1063	KASP	FAM	GAAGGTGACCAAGTTCATGCTACTTCCCGGTTTTTGTTCCTT	31754645
		HEX	GAAGGTCGGAGTCAACGGATTACTTCCCGGTTTTTGTTCCTC
		Com	CTTAGCTCCTCTGCATGGCA
fcp1064	KASP	FAM	GAAGGTGACCAAGTTCATGCTTGATTACGGGCAGGCCGG	31942727
		HEX	GAAGGTCGGAGTCAACGGATTTGATTACGGGCAGGCCGA
		Com	AGCAAGCAGAGCTCTCCATC
a ID = Type of fluorescent dye (FAM or HEX) or primer sequence used for genotyping.
b For KASP assays, red and blue font color represent the Kronos and Gredho allele, respectively.
c Pos (bp) = Physical position of the marker on chromosome 2B in base pairs (based on the Kronos reference genome v1.1; Seong et al. 2024). For SSR markers, positions showed the interval between the forward and reverse primers. For KASP markers, it shows the SNP positions on chromosome 2B.
References
1. Seong K, Kumar R, Lunde C, and Krasileva K (2024) Chromosome-level genome assembly of Triticum turgidum var 'Kronos' [Data set]. Zenodo. https://doi.org/10.5281/zenodo.11106422

## Sheet: Supplementary Table 4
Supplementary Table 4. Annotated gene models in the 108.4 kb candidate gene region of the Kronos genome defined by flanking recombination events identified through high-resolution mappinga
Gene models	Start (bp)	Stop (bp)	Strand	Predicted functionb
TrturKRN2B01G009110	30259251	30261185	-	Transferase family
TrturKRN2B01G009120	30270650	30273077	+	Uncharacterized subfamily of plant invertase/pectin methylesterase inhibitor domains
TrturKRN2B01G009130	30278411	30282896	-	Leucine-rich repeat-receptor-like kinase (LRR-RLK)
TrturKRN2B01G009140	30289244	30291643	+	Exo70 exocyst subunit complex
TrturKRN2B01G009160	30312732	30313337	+	Transferase family
TrturKRN2B01G009170	30314336	30316160	+	Transferase family
a Flanking interval is defined by markers, fcp1028 (30,240,848 bp) and fcp1033 (30,349,230 bp), in the Kronos reference genome (version 1.1; Seong et al. 2024) identified through high-resolution mapping.
b Gene function was predicted using the NCBI Conserved Domain Database and InterProScan v5.52-86.0.
References
1. Seong K, Kumar R, Lunde C, and Krasileva K (2024) Chromosome-level genome assembly of Triticum turgidum var 'Kronos' [Data set]. Zenodo. https://doi.org/10.5281/zenodo.11106422

## Sheet: Supplementary Table 5
Supplementary Table 5. Ptr ToxB reactions and candidate gene analysis comparing the six candidate genes identified in Kronos across 12 sequenced wheat lines.
Wheat Genotypesa	Ploidy	Pseudomolecule or scaffold (Mbp)c	Physical position of flanking markers and Tsc2 interval (bp)			Presence and absence of Tsc2 candidate genes based on annotated Kronos genes TrturKRN2B01G009110- TrturKRN2B01G009170d						Reaction to Ptr ToxBe
			fcp1028	fcp1033	Tsc2 locus	9110	9120	9130	9140	9160	9170
ArinaLrFor	6X	Chr 2B (810.50)	24106472	24245846	139374	+	+	-	-	+	+	I
Chinese Spring	6X	Chr 2B (812.75)	27159852	27276500	116648	+	+	-	-	+	+	I
Fielder	6X	Chr 2B (808.12)	24275497	24413514	138017	+	+	-	-	+	+	I
Jagger	6X	Chr 2B (810.73)	23947930	24087905	139975	+	+	-	-	+	+	I
Julius	6X	Chr 2B (785.94)	22523052	22661420	138368	+	+	-	-	+	+	I
Svevo	4X	Chr 2B (790.33)	23907526	24046853	139327	+	+	-	-	+	+	I
Lancer	6X	Chr 2B (671.56)	22050765	22169159	118394	+	+	+	+	+	+	I
CDC Landmark	6X	Chr 2B (797.31)	19395605	19514579	118974	+	+	+	+	+	+	I
Glennb	6X	contig707 (6.15)	4930135	4821695	108440	+	+	+	+	+	+	S
SY Mattis	6X	Chr 2B (799.85)	20774925	20883578	108653	+	+	+	+	+	+	S
Kronos	4X	Chr 2B (828.54)	30240848	30349230	108382	+	+	+	+	+	+	S
Simetob	4X	utg000555I (5.41)	4804845	4696417	108428	+	+	+	+	+	+	S
a References for the genomic assemblies of wheat: Walkowiak et al. 2020 (ArinaLrFor, CDC Landmark, Jagger, Julius, LongReach Lancer, and SY Mattis), Zhu et al. 2021 (Chinese Spring), Sato et al. 2021 (Fielder), Seong et al. 2024 (Kronos version 1.1), Maccaferri et al. 2019 (Svevo), and unpublished genomic assemblies [Glenn (Jason Fiedler, personal communication) and Simeto (Singh and Faris 2026; …
b Gene models in the Glenn and Simeto assemblies were annotated via AUGUSTUS, as these scaffold-level assemblies are not publicly available.
c Values in parentheses represent approximate mega-basepair (Mbp) coordinates in each physical map or scaffold.
d Orange “+” symbols indicate genes that are conserved in both sensitive and insensitive genotypes and therefore show no association with Ptr ToxB sensitivity. Green “+” symbols highlight genes TrturKRN2B01G009130 and TrturKRN2B01G009140, which are present in all sensitive genotypes but absent in most insensitive genotypes, making them the strongest candidates for Tsc2. The blue “+” symbols indic…
e Reactions to infiltrations with Ptr ToxB recorded as I = insensitive or S = sensitive.
References
1. Maccaferri M, Harris NS, Twardziok SO, Pasam RK, et al. (2019) Durum wheat genome highlights past domestication signatures and future improvement targets. Nat. Genet. 51:885-895. https://doi.org/10.1038/s41588-019-0381-3
2. Sato K, Abe F, Mascher M, Haberer G, et al. (2021) Chromosome-scale genome assembly of the transformation-amenable common wheat cultivar ‘Fielder.’ DNA Res 28:dsab008. https://doi.org/10.1093/dnares/dsab008
3. Seong K, Kumar R, Lunde C, and Krasileva K (2024) Chromosome-level genome assembly of Triticum turgidum var 'Kronos' [Data set]. Zenodo. https://doi.org/10.5281/zenodo.11106422
4. Walkowiak S, Gao L, Monat C, Haberer G, et al. (2020) Multiple wheat genomes reveal global variation in modern breeding. Nature 588:277-283. https://doi.org/10.1038/s41586-020-2961-x
5. Zhu T, Wang L, Rimbert H, Rodriguez JC, et al. (2021) Optical maps refine the bread wheat Triticum aestivum cv. Chinese Spring genome assembly. Plant J 107:303-314. https://doi.org/10.1111/tpj.15289

## Sheet: Supplementary Table 6
Supplementary Table 6. Kronos TILLING lines with mutations in the LRR-RLK gene TrturKRN2B01G009130 and their reaction to infiltration with Ptr ToxB
Kronos TILLING Linesa	Pos (bp)b	WTc	Mutd	Type	Amino acid change	Codon change	SIFTe	Reaction to Ptr ToxB
Kronos4311	406	G	A	missense	G136R	Gga/Aga	0	Sensitive
Kronos608	566	C	T	missense	P189L	cCt/cTt	0	Sensitive
Kronos4066	664	C	T	missense	L222F	Ctc/Ttc	0	Sensitive
Kronos479	727	C	T	missense	P243S	Ccg/Tcg	0.02	Sensitive
Kronos3061	773	G	A	missense	G258E	gGg/gAg	0	Sensitive
Kronos2290	782	C	T	missense	P261L	cCt/cTt	0	Sensitive
Kronos3997	845	G	A	missense	G282D	gGc/gAc	0	Sensitive
Kronos1186	926	T	C	missense	F309S	tTc/tCc	0.01	Sensitive
Kronos4208	928	C	T	missense	P310S	Ccg/Tcg	0	Sensitive
Kronos2876	1073	C	T	missense	P358L	cCa/cTa	0	Sensitive
Kronos3962	1083	G	A	nonsense	W361*	tgG/tgA	NA	Sensitive
Kronos3243	1300	G	A	missense	G434R	Gga/Aga	0.01	Sensitive
Kronos3481	1979	C	T	missense	P660L	cCt/cTt	0.04	Sensitive
Kronos2636	1982	G	A	missense	C661Y	tGt/tAt	0.01	Sensitive
Kronos2071	2231	G	A	missense	G744E	gGa/gAa	0	Sensitive
Kronos302	2254	G	A	missense	G752R	Ggg/Agg	0.01	Sensitive
Kronos3868	2554	G	A	missense	A852T	Gct/Act	0.01	Sensitive
Kronos4561	2674	G	A	missense	A892T	Gca/Aca	0.01	Sensitive
Kronos2109	2737	C	T	nonsense	Q913*	Caa/Taa	NA	Sensitive
a Kronos TILLING lines were generated by Krasileva et al. 2017.
b Pos = Position of the mutant nucleotide in the gene from the START codon (ATG).
c WT = wild type nucleotide.
d Mut = mutant nucleotide.
e SIFT = Sorting Intolerant from Tolerant (Ng and Henikoff 2003).
References
1. Ng PC and Henikoff S (2003) SIFT: Predicting amino acid changes that affect protein function. Nucleic Acids Res 31:3812-3814. https://doi.org/10.1093/nar/gkg509
2. Krasileva KV, Vasquez-Gross HA, Howell T, Bailey P, et al. (2017) Uncovering hidden variation in polyploid wheat. Proc Natl Acad Sci USA 114:E913-E921. https://doi.org/10.1073/pnas.1619268114

## Sheet: Supplementary Table 7
Supplementary Table 7. Kronos TILLING and Prosper EMS lines with mutations in the TtExo70FX15 (Tsc2) gene, their reaction to Ptr ToxB, and their predicted impact on protein integrity
Mutant linea	Ptr ToxB reactionb	Pos (bp)c	Type	AA changed	SIFTe	SAAMBEf	Missense-3Dg	Dynamut2 [ΔΔG (kcal/mol)]h	Dynamut2 [Molecular stability]i
Kronos879	I	374	missense	E125V	0.05	Disruptive	No structural damage	-0.01	Destabilizing
Kronos3205	I	447	nonsense	W149*	NAj	NA		NA	NA
Kronos2647	I	523	missense	A175T	0.17	Nondisruptive	No structural damage	-1.24	Destabilizing
Kronos98	I	556	missense	A186T	0.1	Nondisruptive	No structural damage	-1.14	Destabilizing
Kronos2370	I	559	missense	V187M	0.01	Nondisruptive	No structural damage	-0.21	Destabilizing
Kronos4365	I	903	nonsense	W301*	NA	NA	NA	NA	NA
Kronos2704	I	1172	nonsense	W391*	NA	NA	NA	NA	NA
Kronos3105	S	1177	missense	H393Y	0.1	Disruptive	No structural damage	1.13	Stabilizing
Kronos281	I	1183	nonsense	Q395*	NA	NA	NA	NA	NA
Kronos375	I	1499	missense	G500E	0	Nondisruptive	No structural damage	-0.52	Destabilizing
Prosper19a	I	269	missense	G90D	0.27	Nondisruptive	No structural damage	-1.8	Destabilizing
Prosper145a	I	269	missense	G90D	0.27	Nondisruptive	No structural damage	-1.8	Destabilizing
Prosper105a	I	447	nonsense	W149*	NA	NA	NA	NA	NA
Prosper206a	I	460	nonsense	Q154*	NA	NA	NA	NA	NA
Prosper855a	I	463	missense	D155N	0.13	Nondisruptive	No structural damage	-0.56	Destabilizing
Propser94a	I	487	missense	A163T	0	Nondisruptive	No structural damage	-1.45	Destabilizing
Prosper109a	I	488	missense	A163V	NA	Disruptive	No structural damage	0.15	Stabilizing
Prosper89a	I	556	missense	A186T	0.1	Nondisruptive	No structural damage	-1.14	Destabilizing
Prosper260a	I	556	missense	A186T	0.1	Nondisruptive	No structural damage	-1.14	Destabilizing
Prosper796a	I	572	missense	G191D	0.02	Nondisruptive	Structural damage	-0.07	Destabilizing
Prosper968a	I	838	missense	E280K	0.19	Disruptive	No structural damage	-0.54	Destabilizing
Prosper30a	I	903	nonsense	W301*	NA	NA	NA	NA	NA
Prosper103a	I	1009	missense	L337F	0	Nondisruptive	No structural damage	-1.01	Destabilizing
Prosper510a	I	1352	missense	P451L	0	Disruptive	No structural damage	-0.41	Destabilizing
Prosper97a	I	1408	missense	R470C	0.06	Disruptive	No structural damage	-0.43	Destabilizing
a Kronos TILLING lines were generated by Krasileva et al. 2017.
b I = insensitive to Ptr ToxB; S = sensitive to Ptr ToxB.
c Pos (bp): Position of the variant in base pairs (bp) within the gene sequence (from start codon).
d AA change: Amino acid change resulting from the mutation. A * indicates the induction of a stop codon.
e SIFT: Score from the Sorting Intolerant From Tolerant (SIFT) algorithm predicting whether the variant is likely to be tolerated (higher values; > 0.05) or deleterious (lower values; < 0.05) (Ng and Henikoff 2003).
f SAAMBE: Structural Analysis and Molecular Binding Energy (SAAMBE) prediction of mutation impact on protein function, classified as disruptive or nondisruptive.
g Missense-3D: Structural assessment indicating whether the mutation causes significant structural damage to the protein.
h Dynamut2 [ΔΔG (kcal/mol)]: Free energy change (ΔΔG) prediction from Dynamut2, with negative values suggesting destabilization and positive values indicating stabilization.
i Dynamut2 [Molecular stability]: Classification of the variant’s impact on molecular stability as stabilizing or destabilizing.
j NA: Not applicable or not available for nonsense mutations, which introduce stop codons.
References
1. Ng PC and Henikoff S (2003) SIFT: Predicting amino acid changes that affect protein function. Nucleic Acids Res 31:3812-3814. https://doi.org/10.1093/nar/gkg509
2. Krasileva KV, Vasquez-Gross HA, Howell T, Bailey P, et al. (2017) Uncovering hidden variation in polyploid wheat. Proc Natl Acad Sci USA 114:E913-E921. https://doi.org/10.1073/pnas.1619268114

## Sheet: Supplementary Table 8
Supplementary Table 8. Raw quantification cycle (Cq) value underlying Tsc2 expression analyses across treatments and timepoints.
Biological Set Name	Samplea	Timepointb	Treatmentc	Cq_Targetd	Cq_Referencee	ΔCqf	ΔΔCqg	Fold Changeh
0hpi-B	0hpi-B1	0hpi	Ptr ToxB	31.85	25.0181	6.83192	-0.564888	1.47927
0hpi-B	0hpi-B2	0hpi	Ptr ToxB	32.383	25.2994	7.08362	-0.313181	1.24244
0hpi-B	0hpi-B3	0hpi	Ptr ToxB	33.1822	25.3852	7.79703	0.400227	0.757739
0hpi-B	0hpi-B4	0hpi	Ptr ToxB	34.0687	25.9989	8.06975	0.672944	0.627226
0hpi-B	0hpi-B5	0hpi	Ptr ToxB	31.9033	24.9358	6.96751	-0.429299	1.34658
0hpi-B	0hpi-B6	0hpi	Ptr ToxB	33.9764	26.3504	7.62603	0.229227	0.853092
0hpi-B	0hpi-B7	0hpi	Ptr ToxB	31.3144	24.5654	6.74904	-0.647762	1.56674
0hpi-Y	0hpi-Y1	0hpi	YPD	32.3774	25.5848	6.7926	-0.604205	1.52014
0hpi-Y	0hpi-Y2	0hpi	YPD	32.5032	25.5034	6.99979	-0.39702	1.31678
0hpi-Y	0hpi-Y4	0hpi	YPD	32.1724	23.78	8.39245	0.995644	0.501512
0hpi-Y	0hpi-Y5	0hpi	YPD	31.7629	24.2626	7.50037	0.103562	0.930732
0hpi-Y	0hpi-Y6	0hpi	YPD	31.4986	24.6087	6.88991	-0.506893	1.42099
0hpi-Y	0hpi-Y7	0hpi	YPD	32.4933	24.6876	7.80572	0.408912	0.753191
6hpi-B	6hpi-B1	6hpi	Ptr ToxB	34.8007	24.3179	10.4828	3.086	0.117767
6hpi-B	6hpi-B2	6hpi	Ptr ToxB	34.597	24.3349	10.2621	2.86531	0.137232
6hpi-B	6hpi-B3	6hpi	Ptr ToxB	35.2999	24.5462	10.7536	3.35684	0.0976092
6hpi-B	6hpi-B4	6hpi	Ptr ToxB	35.3757	25.6625	9.71322	2.31642	0.200766
6hpi-B	6hpi-B5	6hpi	Ptr ToxB	35.7087	24.2055	11.5032	4.10637	0.0580577
6hpi-B	6hpi-B6	6hpi	Ptr ToxB	33.8319	25.4748	8.3571	0.960298	0.513951
6hpi-Y	6hpi-Y1	6hpi	YPD	35.2272	25.8989	9.32832	1.93151	0.262154
6hpi-Y	6hpi-Y2	6hpi	YPD	36.2138	26.7274	9.48642	2.08961	0.234944
6hpi-Y	6hpi-Y3	6hpi	YPD	35.2152	23.1442	12.071	4.67417	0.0391683
6hpi-Y	6hpi-Y4	6hpi	YPD	36.4276	24.3911	12.0365	4.63967	0.0401162
6hpi-Y	6hpi-Y6	6hpi	YPD	34.9096	23.7885	11.1211	3.72434	0.0756592
12hpi-B	12hpi-B1	12hpi	Ptr ToxB	30.2097	21.795	8.41469	1.01788	0.493841
12hpi-B	12hpi-B2	12hpi	Ptr ToxB	29.8003	21.8566	7.94373	0.546927	0.684477
12hpi-B	12hpi-B3	12hpi	Ptr ToxB	30.8488	22.9212	7.92759	0.530786	0.692177
12hpi-B	12hpi-B4	12hpi	Ptr ToxB	29.8537	21.7061	8.14757	0.75076	0.59429
12hpi-B	12hpi-B5	12hpi	Ptr ToxB	30.1727	22.1519	8.02088	0.624073	0.648837
12hpi-B	12hpi-B6	12hpi	Ptr ToxB	29.7287	22.067	7.6617	0.264895	0.83226
12hpi-B	12hpi-B7	12hpi	Ptr ToxB	30.4434	22.2304	8.21303	0.81622	0.567928
12hpi-Y	12hpi-Y2	12hpi	YPD	31.5945	22.8986	8.69595	1.29914	0.406368
12hpi-Y	12hpi-Y4	12hpi	YPD	31.82	23.7612	8.05882	0.662014	0.631995
12hpi-Y	12hpi-Y5	12hpi	YPD	31.4977	22.888	8.60975	1.21295	0.431386
12hpi-Y	12hpi-Y6	12hpi	YPD	32.5716	23.6034	8.96819	1.57138	0.336486
12hpi-Y	12hpi-Y7	12hpi	YPD	31.4981	23.6033	7.89483	0.49802	0.708078
24hpi-B	24hpi-B1	24hpi	Ptr ToxB	31.974	22.9519	9.02208	1.62527	0.324149
24hpi-B	24hpi-B2	24hpi	Ptr ToxB	32.327	23.0477	9.2793	1.88249	0.271215
24hpi-B	24hpi-B3	24hpi	Ptr ToxB	30.4069	22.4416	7.96525	0.568446	0.674343
24hpi-B	24hpi-B4	24hpi	Ptr ToxB	34.2476	23.1656	11.0821	3.68525	0.0777374
24hpi-B	24hpi-B6	24hpi	Ptr ToxB	31.7014	22.6937	9.00771	1.6109	0.327393
24hpi-Y	24hpi-Y11	24hpi	YPD	33.0133	24.2834	8.72987	1.33306	0.396924
24hpi-Y	24hpi-Y13	24hpi	YPD	34.0051	26.4555	7.54961	0.152803	0.899501
24hpi-Y	24hpi-Y14	24hpi	YPD	30.9448	24.0131	6.93169	-0.465117	1.38043
24hpi-Y	24hpi-Y3	24hpi	YPD	32.6163	24.6921	7.92413	0.527321	0.693842
24hpi-Y	24hpi-Y7	24hpi	YPD	32.7245	24.1672	8.55732	1.16051	0.447354
48hpi-B	48hpi-B1	48hpi	Ptr ToxB	30.5272	21.5617	8.96548	1.56867	0.337119
48hpi-B	48hpi-B2	48hpi	Ptr ToxB	30.4224	21.8982	8.52421	1.1274	0.457739
48hpi-B	48hpi-B3	48hpi	Ptr ToxB	30.3858	22.3929	7.99289	0.59608	0.661549
48hpi-B	48hpi-B4	48hpi	Ptr ToxB	30.7537	21.8297	8.92397	1.52716	0.346959
48hpi-B	48hpi-B5	48hpi	Ptr ToxB	32.6084	23.2165	9.39186	1.99506	0.250858
48hpi-B	48hpi-B6	48hpi	Ptr ToxB	32.6362	23.3416	9.29467	1.89786	0.26834
48hpi-B	48hpi-B7	48hpi	Ptr ToxB	32.6847	23.5115	9.1732	1.7764	0.291911
48hpi-Y	48hpi-Y1	48hpi	YPD	31.6993	23.6743	8.02502	0.628211	0.646978
48hpi-Y	48hpi-Y2	48hpi	YPD	31.6469	24.9912	6.65561	-0.741193	1.67156
48hpi-Y	48hpi-Y3	48hpi	YPD	32.071	24.6956	7.37544	-0.0213621	1.01492
48hpi-Y	48hpi-Y4	48hpi	YPD	31.0032	24.1396	6.86363	-0.53318	1.44712
48hpi-Y	48hpi-Y6	48hpi	YPD	31.1222	24.0412	7.08099	-0.315819	1.24472
48hpi-Y	48hpi-Y7	48hpi	YPD	31.1718	24.1359	7.03586	-0.360944	1.28427
72hpi-B	72hpi-B1	72hpi	Ptr ToxB	33.4033	23.7583	9.64494	2.24813	0.210496
72hpi-B	72hpi-B2	72hpi	Ptr ToxB	33.1324	23.012	10.1203	2.72352	0.151404
72hpi-B	72hpi-B3	72hpi	Ptr ToxB	33.582	23.2098	10.3723	2.97547	0.127144
72hpi-B	72hpi-B4	72hpi	Ptr ToxB	32.4013	22.2348	10.1665	2.7697	0.146635
72hpi-B	72hpi-B5	72hpi	Ptr ToxB	33.1416	23.1187	10.0229	2.62608	0.161984
72hpi-B	72hpi-B6	72hpi	Ptr ToxB	33.387	23.8259	9.56104	2.16424	0.2231
72hpi-Y	72hpi-Y1	72hpi	YPD	32.844	25.409	7.43504	0.0382379	0.973844
72hpi-Y	72hpi-Y2	72hpi	YPD	33.3869	25.6338	7.75311	0.356302	0.781165
72hpi-Y	72hpi-Y3	72hpi	YPD	32.4158	25.155	7.26079	-0.136019	1.09887
72hpi-Y	72hpi-Y4	72hpi	YPD	32.4496	24.3729	8.07669	0.679888	0.624214
72hpi-Y	72hpi-Y5	72hpi	YPD	32.3902	25.8246	6.5656	-0.831205	1.77917
72hpi-Y	72hpi-Y6	72hpi	YPD	32.7788	25.329	7.44976	0.052954	0.963961
a Unique biological replicate identifier. Each entry represents an independently infiltrated plant sample processed through RNA extraction, cDNA synthesis, and qRT-PCR.
b Sampling timepoint post-infiltration (hpi).
c Treatment applied to the biological replicate (Ptr ToxB or mock control yeast-peptone-dextrose; YPD).
d Quantification cycle (Cq) value for the Tsc2 target gene measured by qRT-PCR.
e Cq value for the GAPDH reference gene used for normalization.
f ΔCq = CqTarget - CqReference. This value represents normalization of Tsc2 to the endogenous control for each biological replicate.
g ΔΔCq = ΔCqsample - mean ΔCq0hpi,YPD, used to calculate the relative expression.
h Fold change calculated as 2-ΔΔCq.

## Sheet: Supplementary Table 9
Supplementary Table 9. Summary of Tsc2 transcriptional responses to Ptr ToxB treatment across different time points.
Timepoint	Treatment	Na	Mean Fold Changeb	SEMc	t-statisticd	P-valuee
0hpi	Ptr ToxB	7	1.125	0.141	0.233	0.82
	YPD	6	1.074	0.166
6hpi	Ptr ToxB	6	0.188	0.068	0.682	0.513
	YPD	5	0.13	0.049
12hpi	Ptr ToxB	7	0.645	0.041	1.732	0.129
	YPD	5	0.503	0.071
24hpi	Ptr ToxB	5	0.335	0.096	-2.112	0.078
	YPD	5	0.764	0.179
48hpi	Ptr ToxB	7	0.373	0.055	-5.454	0.001
	YPD	6	1.218	0.145
72hpi	Ptr ToxB	6	0.17	0.016	-5.284	0.003
	YPD	6	1.037	0.163
a N = number of independent biological replicates for each treatment and time point.
b Relative expression of Tsc2 was calculated using the ΔΔCq method with GAPDH as the endogenous reference gene. Mean Fold Change values represent group-wise averages of the biological replicates (N).
c SEM = standard error of the mean reflects variability within each treatment group [Ptr ToxB and yeast-peptone-dextrose (YPD)].
d Welch’s t-statistic comparing Ptr ToxB-treated samples with mock (YPD) controls at each time point.
e P-value from a two-sided Welch’s t-test comparing treatments at each time point.

## Sheet: Supplementary Table 10
Supplementary Table 10. Presence/absence of Tsc2 and reaction to Ptr ToxB in 112 hexaploid spring wheat lines
USDA National Small Grains Collection accession ID	Name	Accession status	Country of origin	Tsc2 gene presence/absence	Ptr ToxB reaction
CItr 12345	Red Egyptian	cultivated	Egypt	+	S
CItr 13777	RL 4137	breeding	Canada	+	I
CItr 15136	American 378	breeding	Sudan	-	I
CItr 15522	II-53-761	breeding	United States	+	S
CItr 17750	RL 4314	breeding	Canada	+	S
PI 70698	Pseudo-erythroleucon	landrace	Iraq	+	I
PI 155119	'Caesium 111'	cultivar	Russian Federation	+	I
PI 165180	Akyarnaz	landrace	Turkey	+	I
PI 170907	153-M-M-3	breeding	South Africa	+	S
PI 170910	163-2-1-1	breeding	South Africa	+	S
PI 176225	9544a	landrace	India	+	I
PI 178752	Hamra	landrace	Iraq	-	I
PI 182077	S-1	cultivated	Pakistan	+	I
PI 185401	H 16	cultivated	Portugal	-	I
PI 185713	'Ideal'	cultivar	Portugal	+	I
PI 185891	II-116-2C-8C-1C-14C	breeding	Mexico	+	S
PI 189737	'Norin 96'	cultivar	Japan	-	I
PI 189826	49-2810 H1070	breeding	Argentina	-	I
PI 191453	Hundi	cultivated	Spain	+	I
PI 192208	Rumanien	cultivated	Romania	+	I
PI 192539	H 19 D 12716	cultivated	Portugal	+	S
PI 192648	2288A	breeding	Mozambique	+	S
PI 193014	'Bontaar'	cultivar	South Africa	+	I
PI 210972	T.A. 622-3 Sasl 2176	cultivated	Egypt	+	S
PI 211102	12794	landrace	Afghanistan	-	I
PI 223190	'Kurtur No. 1'	breeding	Ecuador	-	I
PI 225160	'Mentana'	cultivar	Italy	-	I
PI 227199	'Penkop'	cultivar	South Africa	+	S
PI 254128	559.O.1.L.2	breeding	Kenya	+	S
PI 262636	'Alabasskaja'	cultivar	Kazakhstan	-	I
PI 270044	C591	cultivated	Pakistan	-	I
PI 272331	IAS-43	breeding	Brazil	-	I
PI 278220	Brook 3	cultivated	Austria	+	S
PI 278741	'Taichung No. 23'	cultivar	Taiwan	-	I
PI 282922	I-1039	breeding	Argentina	-	I
PI 283148	'F 8'	cultivar	Jordan	-	I
PI 322199	WC 545	cultivated	India	-	I
PI 326304	'Dal'nevostocnaja'	cultivar	Russian Federation	+	S
PI 337605	'Rothwell Sprite'	cultivar	United Kingdom	-	I
PI 338530	'Niki'	cultivar	Greece	+	S
PI 340684	'Chinese 166'	cultivar	Netherlands	-	I
PI 347169	Tirmai	landrace	Afghanistan	-	I
PI 351504	'Massaux No. 3'	cultivar	Argentina	-	I
PI 351536	Ottawa 2780 E	cultivated	Canada	-	I
PI 351736	'Cluj 50-2490'	cultivar	Romania	+	S
PI 351870	T-2089	cultivated	Burundi	-	I
PI 351874	T-2093	cultivated	Burundi	-	I
PI 352179	'MO 58-30'	cultivar	Norway	-	I
PI 352204	B 580	breeding	Switzerland	+	S
PI 352251	T-2842	breeding	Switzerland	-	I
PI 358339	2020/70	breeding	Croatia	-	I
PI 367681	'Kasteel'	cultivar	South Africa	-	I
PI 378912	13440	cultivated	Colombia	+	S
PI 384378	Dikwa 33	cultivated	Nigeria	+	S
PI 388038	N/A	breeding	Israel	+	S
PI 404235	'Bal'bugda'	cultivar	Azerbaijan	-	I
PI 410909	Boudahaika	landrace	Morocco	-	I
PI 413005	F430K20	breeding	South Africa	+	S
PI 422280	'HI 385'	cultivar	India	-	I
PI 422282	'HI 588'	cultivar	India	-	I
PI 428528	'Prinqual'	cultivar	France	-	I
PI 449298	7020	breeding	Spain	-	I
PI 462111	280	cultivated	Yemen	+	S
PI 468980	MG 27028	landrace	Greece	+	I
PI 469062	MG 27948	landrace	Greece	+	I
PI 519383	L935-4L-1AP-0AP-2K-0AP	breeding	Syria	+	I
PI 519503	L 1360-3838	breeding	Egypt	+	S
PI 519662	Frohberg 12-107	breeding	United States	+	S
PI 520073	N/A	breeding	Mexico	+	I
PI 520107	'Cumhuriyet 75'	cultivar	Turkey	-	I
PI 520265	ND 598	breeding	United States	+	S
PI 520346	N/A	breeding	Canada	+	S
PI 520350	ND 587	breeding	United States	+	S
PI 534372	MG 18160	landrace	Tunisia	-	I
PI 534433	MG 18222	landrace	Algeria	+	S
PI 565222	Gabo	landrace	Bolivia	-	I
PI 574501	NR 2	breeding	Canada	+	S
PI 591942	'SST 124'	cultivar	South Africa	+	S
PI 613323	CIGM90.1291	breeding	Mexico	+	S
PI 623820	IWA8607143	landrace	Iran	-	I
PI 625141	IWA8609754	landrace	Iran	+	I
PI 625253	IWA8610524	landrace	Iran	+	I
NA	6B662	breeding	Canada	+	S
NA	Alsen	cultivar	North Dakota, USA	+	I
NA	Arina	cultivar	Switzerland	-	I
PI 520554	Bobwhite	cultivar	Canada	-	I
NA	BR34	breeding	Brazil	-	I
CItr 17681	Butte	cultivar	North Dakota, USA	-	I
CItr 14108	Chinese Spring	cultivar	China	-	I
PI 633862	Dapps	cultivar	North Dakota, USA	+	I
CItr 17268	Fielder	cultivar	Idaho, USA	-	I
PI 639273	Glenn	cultivar	North Dakota, USA	+	S
PI 531005	Grandin	cultivar	North Dakota, USA	+	S
NA	Hanna	cultivar	Agripro, USA	+	S
CItr 15090	Hard Red Calcutta	Uncertain improvement status	Saskatchewan, Canada	-	I
CItr 8178	Hope	cultivar	South Dakota, USA	+	I
NA	Katepwa	cultivar	Canada	+	S
PI 590576	Kulm	cultivar	North Dakota, USA	+	S
PI 508271	Lancer	cultivar	Canada	+	I
NA	CDC Landmark	cultivar	Canada	+	I
CItr 17790	Len	cultivar	North Dakota, USA	+	S
PI 351208	Marquis	cultivar	Canada	-	I
NA	ND 2709	breeding	North Dakota, USA	+	I
NA	ND 495	breeding	North Dakota, USA	-	I
NA	Norin-61	cultivar	Japan	-	I
PI 613587	Parshall	cultivar	North Dakota, USA	+	S
PI 348919	Red Fife	cultivar	Australia	-	I
PI 634981	Steele-ND	cultivar	North Dakota, USA	+	S
PI 481542	Sumai3	cultivar	China	-	I
PI 168659	Thatcher	cultivar	Minnesota, USA	+	S
PI 168688	Timstein	cultivar	Minnesota, USA	-	I
NA	W7984	synthetic	Mexico	+	S

[truncated: 9 more sheets: Supplementary Table 11, Supplementary Table 12, Supplementary Table 13, Supplementary Table 14, Supplementary Table 15, Supplementary Table 16, Supplementary Table 17, Supplementary Table 18, Supplementary Table 19]
